# Supplementary material
Source: publisher figshare collection journal article supplement (https://acs.figshare.com/ndownloader/files/6927710)
Supplement: Supplementary file 1 [file 6927710]

 
data_X16049 
  
_audit_creation_method            SHELXL-2014/6 
_chemical_name_systematic         ? 
_chemical_name_common             ? 
_chemical_melting_point           ? 
_chemical_formula_moiety          ? 
_chemical_formula_sum 
 'C51 H63 Cl Mo N2 O' 
_chemical_formula_weight          851.42 
  
loop_ 
 _atom_type_symbol 
 _atom_type_description 
 _atom_type_scat_dispersion_real 
 _atom_type_scat_dispersion_imag 
 _atom_type_scat_source 
 'C'  'C'   0.0033   0.0016 
 'International Tables Vol C Tables 4.2.6.8 and 6.1.1.4' 
 'H'  'H'   0.0000   0.0000 
 'International Tables Vol C Tables 4.2.6.8 and 6.1.1.4' 
 'N'  'N'   0.0061   0.0033 
 'International Tables Vol C Tables 4.2.6.8 and 6.1.1.4' 
 'O'  'O'   0.0106   0.0060 
 'International Tables Vol C Tables 4.2.6.8 and 6.1.1.4' 
 'Cl'  'Cl'   0.1484   0.1585 
 'International Tables Vol C Tables 4.2.6.8 and 6.1.1.4' 
 'Mo'  'Mo'  -1.6832   0.6857 
 'International Tables Vol C Tables 4.2.6.8 and 6.1.1.4' 
  
_space_group_crystal_system       monoclinic 
_space_group_IT_number            14 
_space_group_name_H-M_alt         'P 21/n' 
_space_group_name_Hall            '-P 2yn' 
  
_shelx_space_group_comment 
; 
The symmetry employed for this shelxl refinement is uniquely defined 
by the following loop, which should always be used as a source of 
symmetry information in preference to the above space-group names. 
They are only intended as comments. 
; 
  
loop_ 
 _space_group_symop_operation_xyz 
 'x, y, z' 
 '-x+1/2, y+1/2, -z+1/2' 
 '-x, -y, -z' 
 'x-1/2, -y-1/2, z-1/2' 
  
_cell_length_a                    20.729(5) 
_cell_length_b                    11.107(2) 
_cell_length_c                    21.689(5) 
_cell_angle_alpha                 90 
_cell_angle_beta                  110.024(4) 
_cell_angle_gamma                 90 
_cell_volume                      4691.6(18) 
_cell_formula_units_Z             4 
_cell_measurement_temperature     100(2) 
_cell_measurement_reflns_used     9458 
_cell_measurement_theta_min       2.18 
_cell_measurement_theta_max       31.68 
  
_exptl_crystal_description        block 
_exptl_crystal_colour             yellow 
_exptl_crystal_density_meas       . 
_exptl_crystal_density_method     'not measured' 
_exptl_crystal_density_diffrn     1.205 
_exptl_crystal_F_000              1800 
_exptl_transmission_factor_min    ? 
_exptl_transmission_factor_max    ? 
_exptl_crystal_size_max           0.515 
_exptl_crystal_size_mid           0.275 
_exptl_crystal_size_min           0.225 
_exptl_absorpt_coefficient_mu     0.373 
_shelx_estimated_absorpt_T_min    0.831 
_shelx_estimated_absorpt_T_max    0.921 
_exptl_absorpt_correction_type    multi-scan 
_exptl_absorpt_correction_T_min   0.7043  
_exptl_absorpt_correction_T_max   0.7463  
_exptl_absorpt_process_details    'SADABS (Sheldrick, 2009)' 
_exptl_absorpt_special_details    ? 
_diffrn_ambient_temperature       100(2) 
_diffrn_radiation_wavelength      0.71073 
_diffrn_radiation_type            MoK\a 
_diffrn_source                    'I\mS micro-focus sealed tube, multilayer optics' 
_diffrn_measurement_device_type   'Bruker Smart APEX2 CCD' 
_diffrn_measurement_method        '\f and \w scans' 
_diffrn_detector_area_resol_mean  8.3 
_diffrn_reflns_number             143485 
_diffrn_reflns_av_unetI/netI      0.0186 
_diffrn_reflns_av_R_equivalents   0.0354 
_diffrn_reflns_limit_h_min        -29 
_diffrn_reflns_limit_h_max        29 
_diffrn_reflns_limit_k_min        -15 
_diffrn_reflns_limit_k_max        15 
_diffrn_reflns_limit_l_min        -30 
_diffrn_reflns_limit_l_max        30 
_diffrn_reflns_theta_min          1.676 
_diffrn_reflns_theta_max          30.508 
_diffrn_reflns_theta_full         25.242 
_diffrn_measured_fraction_theta_max   0.998 
_diffrn_measured_fraction_theta_full  1.000 
_diffrn_reflns_Laue_measured_fraction_max    0.998 
_diffrn_reflns_Laue_measured_fraction_full   1.000 
_diffrn_reflns_point_group_measured_fraction_max   0.998 
_diffrn_reflns_point_group_measured_fraction_full  1.000 
_reflns_number_total              14282 
_reflns_number_gt                 12598 
_reflns_threshold_expression      'I > 2\s(I)' 
_reflns_Friedel_coverage          0.000 
_reflns_Friedel_fraction_max      . 
_reflns_Friedel_fraction_full     . 
  
_reflns_special_details 
; 
 Reflections were merged by SHELXL according to the crystal 
 class for the calculation of statistics and refinement. 
  
 _reflns_Friedel_fraction is defined as the number of unique 
 Friedel pairs measured divided by the number that would be 
 possible theoretically, ignoring centric projections and 
 systematic absences. 
; 
  
_computing_data_collection        'APEX2 v2011.4.0 (Bruker-AXS, 2015)' 
_computing_cell_refinement        'SAINT 7.46A (Bruker-AXS, 2015)' 
_computing_data_reduction         'SAINT 7.46A (Bruker-AXS, 2015)' 
_computing_structure_solution     'SHELXS-2015 (Sheldrick, 2015)' 
_computing_structure_refinement 'SHELXL-2014/6 (Sheldrick, 2014)' 
_computing_molecular_graphics     'Bruker SHELXTL' 
_computing_publication_material   'Bruker SHELXTL' 
_refine_special_details 
; 
 Alkylidene disordered over two positions.

 Bruker X8 Kappa DUO four-circle diffractometer, Bruker APEX2 CCD. 
 The instrument was purchased with the help of funding from the 
 National Science Foundation (NSF) under Grant Number 
 CHE-0946721.  Please acknowledge this grant in all publications 
 of this structure. 
; 
_refine_ls_structure_factor_coef  Fsqd 
_refine_ls_matrix_type            full 
_refine_ls_weighting_scheme       calc 
_refine_ls_weighting_details 
'w=1/[\s^2^(Fo^2^)+(0.0295P)^2^+2.4178P] where P=(Fo^2^+2Fc^2^)/3' 
_atom_sites_solution_primary      direct 
_atom_sites_solution_secondary    difmap 
_atom_sites_solution_hydrogens    mixed 
_refine_ls_hydrogen_treatment     mixed 
_refine_ls_extinction_method      none 
_refine_ls_extinction_coef        . 
_refine_ls_number_reflns          14282 
_refine_ls_number_parameters      598 
_refine_ls_number_restraints      418 
_refine_ls_R_factor_all           0.0317 
_refine_ls_R_factor_gt            0.0261 
_refine_ls_wR_factor_ref          0.0688 
_refine_ls_wR_factor_gt           0.0651 
_refine_ls_goodness_of_fit_ref    1.028 
_refine_ls_restrained_S_all       1.029 
_refine_ls_shift/su_max           0.003 
_refine_ls_shift/su_mean          0.000 
  
loop_ 
 _atom_site_label 
 _atom_site_type_symbol 
 _atom_site_fract_x 
 _atom_site_fract_y 
 _atom_site_fract_z 
 _atom_site_U_iso_or_equiv 
 _atom_site_adp_type 
 _atom_site_occupancy 
 _atom_site_site_symmetry_order 
 _atom_site_calc_flag 
 _atom_site_refinement_flags_posn 
 _atom_site_refinement_flags_adp 
 _atom_site_refinement_flags_occupancy 
 _atom_site_disorder_assembly 
 _atom_site_disorder_group 
Cl1 Cl 0.75844(2) 0.16326(3) 0.48607(2) 0.02471(6) Uani 1 1 d . . . . . 
Mo1 Mo 0.75943(2) 0.37769(2) 0.48038(2) 0.01433(3) Uani 1 1 d . . . . . 
C1 C 0.82683(6) 0.42244(11) 0.56082(6) 0.0211(2) Uani 1 1 d D . . . . 
H1 H 0.8045(8) 0.4126(15) 0.5931(7) 0.025 Uiso 1 1 d D U . . . 
C2 C 0.89976(7) 0.46932(13) 0.59034(6) 0.0253(2) Uani 1 1 d D U . . . 
C3 C 0.9343(4) 0.4949(5) 0.5380(4) 0.0220(8) Uani 0.631(3) 1 d D U P A 1 
H3A H 0.9798 0.5300 0.5594 0.033 Uiso 0.631(3) 1 calc R U P A 1 
H3B H 0.9058 0.5512 0.5051 0.033 Uiso 0.631(3) 1 calc R U P A 1 
H3C H 0.9388 0.4193 0.5165 0.033 Uiso 0.631(3) 1 calc R U P A 1 
C4 C 0.9438(4) 0.3760(5) 0.6368(3) 0.0318(10) Uani 0.631(3) 1 d D U P A 1 
H4A H 0.9228 0.3544 0.6695 0.048 Uiso 0.631(3) 1 calc R U P A 1 
H4B H 0.9897 0.4091 0.6590 0.048 Uiso 0.631(3) 1 calc R U P A 1 
H4C H 0.9473 0.3041 0.6119 0.048 Uiso 0.631(3) 1 calc R U P A 1 
C5 C 0.89532(14) 0.5919(3) 0.62405(14) 0.0244(5) Uani 0.631(3) 1 d D U P A 1 
C6 C 0.9129(2) 0.5988(3) 0.69186(16) 0.0426(7) Uani 0.631(3) 1 d D U P A 1 
H6 H 0.9296 0.5291 0.7178 0.051 Uiso 0.631(3) 1 calc R U P A 1 
C7 C 0.9065(2) 0.7079(4) 0.7227(2) 0.0534(9) Uani 0.631(3) 1 d D U P A 1 
H7 H 0.9195 0.7114 0.7691 0.064 Uiso 0.631(3) 1 calc R U P A 1 
C8 C 0.88147(15) 0.8086(3) 0.68575(16) 0.0512(8) Uani 0.631(3) 1 d D U P A 1 
H8 H 0.8757 0.8812 0.7064 0.061 Uiso 0.631(3) 1 calc R U P A 1 
C9 C 0.86472(14) 0.8042(3) 0.61874(15) 0.0455(8) Uani 0.631(3) 1 d D U P A 1 
H9 H 0.8487 0.8746 0.5932 0.055 Uiso 0.631(3) 1 calc R U P A 1 
C10 C 0.87124(12) 0.6965(2) 0.58819(13) 0.0337(6) Uani 0.631(3) 1 d D U P A 1 
H10 H 0.8589 0.6945 0.5418 0.040 Uiso 0.631(3) 1 calc R U P A 1 
C3A C 0.9266(7) 0.5188(10) 0.5409(7) 0.031(2) Uani 0.369(3) 1 d D U P A 2 
H3A1 H 0.9275 0.4553 0.5098 0.047 Uiso 0.369(3) 1 calc R U P A 2 
H3A2 H 0.9732 0.5494 0.5627 0.047 Uiso 0.369(3) 1 calc R U P A 2 
H3A3 H 0.8969 0.5846 0.5172 0.047 Uiso 0.369(3) 1 calc R U P A 2 
C4A C 0.9405(7) 0.3536(9) 0.6243(5) 0.0319(19) Uani 0.369(3) 1 d D U P A 2 
H4A1 H 0.9207 0.3222 0.6562 0.048 Uiso 0.369(3) 1 calc R U P A 2 
H4A2 H 0.9888 0.3744 0.6470 0.048 Uiso 0.369(3) 1 calc R U P A 2 
H4A3 H 0.9373 0.2921 0.5910 0.048 Uiso 0.369(3) 1 calc R U P A 2 
C5A C 0.8955(3) 0.5590(5) 0.6428(2) 0.0291(10) Uani 0.369(3) 1 d D U P A 2 
C6A C 0.9356(2) 0.5545(5) 0.7078(2) 0.0303(9) Uani 0.369(3) 1 d D U P A 2 
H6A H 0.9665 0.4893 0.7240 0.036 Uiso 0.369(3) 1 calc R U P A 2 
C7A C 0.9310(2) 0.6458(5) 0.7501(2) 0.0395(11) Uani 0.369(3) 1 d D U P A 2 
H7A H 0.9616 0.6453 0.7942 0.047 Uiso 0.369(3) 1 calc R U P A 2 
C8A C 0.8836(3) 0.7364(6) 0.7299(3) 0.0493(15) Uani 0.369(3) 1 d D U P A 2 
H8A H 0.8791 0.7950 0.7601 0.059 Uiso 0.369(3) 1 calc R U P A 2 
C9A C 0.8430(4) 0.7406(5) 0.6653(3) 0.073(2) Uani 0.369(3) 1 d D U P A 2 
H9A H 0.8106 0.8039 0.6500 0.087 Uiso 0.369(3) 1 calc R U P A 2 
C10A C 0.8489(3) 0.6519(5) 0.6218(3) 0.0583(17) Uani 0.369(3) 1 d D U P A 2 
H10A H 0.8204 0.6558 0.5770 0.070 Uiso 0.369(3) 1 calc R U P A 2 
N1 N 0.80764(5) 0.38401(8) 0.42812(5) 0.01679(18) Uani 1 1 d . . . . . 
C11 C 0.84014(6) 0.37639(10) 0.38156(6) 0.0185(2) Uani 1 1 d . . . . . 
C12 C 0.82242(6) 0.45893(11) 0.32838(6) 0.0223(2) Uani 1 1 d . . . . . 
C13 C 0.85791(7) 0.45075(14) 0.28432(7) 0.0299(3) Uani 1 1 d . . . . . 
H13 H 0.8468 0.5046 0.2482 0.036 Uiso 1 1 calc R U . . . 
C14 C 0.90894(8) 0.36574(15) 0.29222(7) 0.0338(3) Uani 1 1 d . . . . . 
H14 H 0.9327 0.3624 0.2618 0.041 Uiso 1 1 calc R U . . . 
C15 C 0.92551(7) 0.28563(13) 0.34414(7) 0.0303(3) Uani 1 1 d . . . . . 
H15 H 0.9607 0.2278 0.3489 0.036 Uiso 1 1 calc R U . . . 
C16 C 0.89161(6) 0.28802(11) 0.38975(6) 0.0224(2) Uani 1 1 d . . . . . 
C17 C 0.76621(7) 0.55101(12) 0.31987(7) 0.0271(3) Uani 1 1 d . . . . . 
H17 H 0.7701 0.5808 0.3645 0.033 Uiso 1 1 calc R U . . . 
C18 C 0.77093(10) 0.66080(16) 0.27859(9) 0.0440(4) Uani 1 1 d . . . . . 
H18A H 0.8162 0.6984 0.2978 0.066 Uiso 1 1 calc R U . . . 
H18B H 0.7352 0.7190 0.2779 0.066 Uiso 1 1 calc R U . . . 
H18C H 0.7645 0.6350 0.2336 0.066 Uiso 1 1 calc R U . . . 
C19 C 0.69551(8) 0.49145(16) 0.28994(8) 0.0389(3) Uani 1 1 d . . . . . 
H19A H 0.6900 0.4616 0.2459 0.058 Uiso 1 1 calc R U . . . 
H19B H 0.6595 0.5506 0.2871 0.058 Uiso 1 1 calc R U . . . 
H19C H 0.6918 0.4240 0.3177 0.058 Uiso 1 1 calc R U . . . 
C20 C 0.90850(7) 0.19493(12) 0.44410(7) 0.0253(2) Uani 1 1 d . . . . . 
H20 H 0.8865 0.2211 0.4764 0.030 Uiso 1 1 calc R U . . . 
C21 C 0.87740(8) 0.07273(13) 0.41581(8) 0.0350(3) Uani 1 1 d . . . . . 
H21A H 0.8278 0.0818 0.3933 0.052 Uiso 1 1 calc R U . . . 
H21B H 0.8858 0.0142 0.4515 0.052 Uiso 1 1 calc R U . . . 
H21C H 0.8988 0.0443 0.3846 0.052 Uiso 1 1 calc R U . . . 
C22 C 0.98588(8) 0.18199(15) 0.48109(9) 0.0374(3) Uani 1 1 d . . . . . 
H22A H 1.0082 0.1502 0.4513 0.056 Uiso 1 1 calc R U . . . 
H22B H 0.9935 0.1266 0.5181 0.056 Uiso 1 1 calc R U . . . 
H22C H 1.0054 0.2609 0.4975 0.056 Uiso 1 1 calc R U . . . 
O1 O 0.67368(4) 0.37065(7) 0.50077(4) 0.01636(15) Uani 1 1 d . . . . . 
C31 C 0.62713(6) 0.29815(10) 0.51159(5) 0.01538(19) Uani 1 1 d . . . . . 
C32 C 0.56656(6) 0.26937(10) 0.45943(5) 0.0165(2) Uani 1 1 d . . . . . 
C33 C 0.51812(6) 0.19446(11) 0.47156(6) 0.0212(2) Uani 1 1 d . . . . . 
H33 H 0.4774 0.1740 0.4365 0.025 Uiso 1 1 calc R U . . . 
C34 C 0.52845(7) 0.14927(12) 0.53403(6) 0.0239(2) Uani 1 1 d . . . . . 
H34 H 0.4951 0.0985 0.5417 0.029 Uiso 1 1 calc R U . . . 
C35 C 0.58799(7) 0.17907(11) 0.58503(6) 0.0220(2) Uani 1 1 d . . . . . 
H35 H 0.5949 0.1483 0.6277 0.026 Uiso 1 1 calc R U . . . 
C36 C 0.63817(6) 0.25334(10) 0.57531(5) 0.0179(2) Uani 1 1 d . . . . . 
C37 C 0.55429(6) 0.31707(10) 0.39190(5) 0.0166(2) Uani 1 1 d . . . . . 
C38 C 0.53289(6) 0.43674(11) 0.37640(6) 0.0201(2) Uani 1 1 d . . . . . 
C39 C 0.51726(7) 0.47739(12) 0.31206(6) 0.0262(3) Uani 1 1 d . . . . . 
H39 H 0.5019 0.5579 0.3016 0.031 Uiso 1 1 calc R U . . . 
C40 C 0.52363(8) 0.40315(13) 0.26280(6) 0.0287(3) Uani 1 1 d . . . . . 
C41 C 0.54649(7) 0.28620(12) 0.27930(6) 0.0261(3) Uani 1 1 d . . . . . 
H41 H 0.5523 0.2351 0.2465 0.031 Uiso 1 1 calc R U . . . 
C42 C 0.56122(6) 0.24144(11) 0.34277(6) 0.0204(2) Uani 1 1 d . . . . . 
C43 C 0.52544(7) 0.51926(12) 0.42840(7) 0.0285(3) Uani 1 1 d . . . . . 
H43A H 0.5044 0.5951 0.4082 0.043 Uiso 1 1 calc R U . . . 
H43B H 0.5708 0.5356 0.4609 0.043 Uiso 1 1 calc R U . . . 
H43C H 0.4963 0.4810 0.4500 0.043 Uiso 1 1 calc R U . . . 
C44 C 0.50521(11) 0.44761(16) 0.19300(7) 0.0477(5) Uani 1 1 d . . . . . 
H44A H 0.4571 0.4282 0.1685 0.071 Uiso 1 1 calc R U . . . 
H44B H 0.5348 0.4085 0.1722 0.071 Uiso 1 1 calc R U . . . 
H44C H 0.5117 0.5350 0.1931 0.071 Uiso 1 1 calc R U . . . 
C45 C 0.58287(8) 0.11193(12) 0.35723(7) 0.0293(3) Uani 1 1 d . . . . . 
H45A H 0.5470 0.0674 0.3675 0.044 Uiso 1 1 calc R U . . . 
H45B H 0.6258 0.1083 0.3948 0.044 Uiso 1 1 calc R U . . . 
H45C H 0.5900 0.0759 0.3188 0.044 Uiso 1 1 calc R U . . . 
C46 C 0.70202(6) 0.28036(11) 0.63182(5) 0.0185(2) Uani 1 1 d . . . . . 
C47 C 0.71457(6) 0.39698(11) 0.65884(6) 0.0201(2) Uani 1 1 d . . . . . 
C48 C 0.77267(6) 0.41766(13) 0.71415(6) 0.0239(2) Uani 1 1 d . . . . . 
H48 H 0.7811 0.4964 0.7322 0.029 Uiso 1 1 calc R U . . . 
C49 C 0.81839(6) 0.32547(14) 0.74336(6) 0.0263(3) Uani 1 1 d . . . . . 
C50 C 0.80612(7) 0.21174(13) 0.71527(6) 0.0270(3) Uani 1 1 d . . . . . 
H50 H 0.8378 0.1488 0.7341 0.032 Uiso 1 1 calc R U . . . 
C51 C 0.74860(7) 0.18711(12) 0.66013(6) 0.0226(2) Uani 1 1 d . . . . . 
C52 C 0.66646(7) 0.50060(12) 0.63017(7) 0.0270(3) Uani 1 1 d . . . . . 
H52A H 0.6864 0.5753 0.6527 0.040 Uiso 1 1 calc R U . . . 
H52B H 0.6223 0.4857 0.6359 0.040 Uiso 1 1 calc R U . . . 
H52C H 0.6594 0.5080 0.5833 0.040 Uiso 1 1 calc R U . . . 
C53 C 0.87929(8) 0.34674(17) 0.80511(7) 0.0379(4) Uani 1 1 d . . . . . 
H53A H 0.8667 0.3267 0.8435 0.057 Uiso 1 1 calc R U . . . 
H53B H 0.8930 0.4315 0.8073 0.057 Uiso 1 1 calc R U . . . 
H53C H 0.9177 0.2958 0.8045 0.057 Uiso 1 1 calc R U . . . 
C54 C 0.73929(8) 0.06117(12) 0.63236(7) 0.0301(3) Uani 1 1 d . . . . . 
H54A H 0.7827 0.0170 0.6500 0.045 Uiso 1 1 calc R U . . . 
H54B H 0.7254 0.0651 0.5844 0.045 Uiso 1 1 calc R U . . . 
H54C H 0.7037 0.0197 0.6446 0.045 Uiso 1 1 calc R U . . . 
N2 N 0.72406(5) 0.56256(9) 0.46055(5) 0.02074(19) Uani 1 1 d . . . . . 
C61 C 0.70459(7) 0.65919(11) 0.45205(6) 0.0233(2) Uani 1 1 d . . . . . 
C62 C 0.68066(8) 0.78565(11) 0.43937(8) 0.0306(3) Uani 1 1 d . . . . . 
C63 C 0.66735(9) 0.83330(15) 0.50000(8) 0.0399(4) Uani 1 1 d . . . . . 
H63A H 0.6320 0.7840 0.5084 0.060 Uiso 1 1 calc R U . . . 
H63B H 0.6516 0.9170 0.4925 0.060 Uiso 1 1 calc R U . . . 
H63C H 0.7099 0.8295 0.5380 0.060 Uiso 1 1 calc R U . . . 
C64 C 0.61421(10) 0.78538(14) 0.37961(8) 0.0460(4) Uani 1 1 d . . . . . 
H64A H 0.6233 0.7506 0.3418 0.069 Uiso 1 1 calc R U . . . 
H64B H 0.5976 0.8681 0.3694 0.069 Uiso 1 1 calc R U . . . 
H64C H 0.5793 0.7372 0.3894 0.069 Uiso 1 1 calc R U . . . 
C65 C 0.73716(11) 0.85709(14) 0.42484(13) 0.0553(5) Uani 1 1 d . . . . . 
H65A H 0.7796 0.8535 0.4630 0.083 Uiso 1 1 calc R U . . . 
H65B H 0.7227 0.9412 0.4156 0.083 Uiso 1 1 calc R U . . . 
H65C H 0.7453 0.8222 0.3866 0.083 Uiso 1 1 calc R U . . . 
  
loop_ 
 _atom_site_aniso_label 
 _atom_site_aniso_U_11 
 _atom_site_aniso_U_22 
 _atom_site_aniso_U_33 
 _atom_site_aniso_U_23 
 _atom_site_aniso_U_13 
 _atom_site_aniso_U_12 
Cl1 0.02991(15) 0.01583(12) 0.03435(16) 0.00215(11) 0.01866(13) 0.00131(11) 
Mo1 0.01489(5) 0.01451(5) 0.01420(5) -0.00009(3) 0.00577(3) 0.00027(3) 
C1 0.0208(6) 0.0239(5) 0.0187(5) -0.0012(4) 0.0067(4) 0.0007(4) 
C2 0.0202(6) 0.0315(6) 0.0213(5) -0.0044(5) 0.0033(5) -0.0005(5) 
C3 0.0203(15) 0.0183(18) 0.0285(14) -0.0020(14) 0.0095(11) -0.0035(14) 
C4 0.0242(18) 0.039(2) 0.027(2) 0.0066(17) 0.0016(18) 0.0009(16) 
C5 0.0164(10) 0.0339(14) 0.0217(13) -0.0084(10) 0.0049(10) -0.0058(10) 
C6 0.058(2) 0.0435(17) 0.0299(14) -0.0073(12) 0.0193(14) -0.0133(14) 
C7 0.060(3) 0.064(2) 0.0424(17) -0.0247(16) 0.0251(17) -0.0152(19) 
C8 0.0405(15) 0.0532(17) 0.0585(18) -0.0358(14) 0.0153(13) -0.0057(13) 
C9 0.0315(13) 0.0368(13) 0.0549(16) -0.0209(12) -0.0022(11) 0.0061(10) 
C10 0.0288(11) 0.0316(11) 0.0325(12) -0.0118(9) 0.0002(9) 0.0037(9) 
C3A 0.029(4) 0.027(4) 0.032(3) 0.001(3) 0.001(2) -0.008(3) 
C4A 0.021(3) 0.050(4) 0.018(3) 0.003(2) -0.002(2) -0.002(3) 
C5A 0.027(2) 0.035(2) 0.021(2) -0.0039(16) 0.0032(17) -0.0090(17) 
C6A 0.023(2) 0.050(3) 0.0186(18) -0.0061(17) 0.0090(15) -0.0085(17) 
C7A 0.027(2) 0.060(3) 0.033(2) -0.017(2) 0.0124(17) -0.0128(19) 
C8A 0.041(3) 0.050(3) 0.053(3) -0.021(2) 0.010(2) -0.005(2) 
C9A 0.088(4) 0.042(3) 0.058(3) -0.028(2) -0.014(3) 0.017(3) 
C10A 0.074(3) 0.035(2) 0.038(2) -0.0165(19) -0.017(2) 0.010(2) 
N1 0.0172(4) 0.0157(4) 0.0181(4) 0.0001(3) 0.0068(4) 0.0001(3) 
C11 0.0180(5) 0.0206(5) 0.0184(5) -0.0038(4) 0.0083(4) -0.0042(4) 
C12 0.0237(6) 0.0254(6) 0.0192(5) -0.0014(4) 0.0091(5) -0.0054(5) 
C13 0.0329(7) 0.0387(7) 0.0218(6) -0.0011(5) 0.0138(5) -0.0084(6) 
C14 0.0341(7) 0.0467(8) 0.0288(7) -0.0093(6) 0.0212(6) -0.0081(6) 
C15 0.0265(7) 0.0356(7) 0.0336(7) -0.0098(6) 0.0166(6) -0.0015(5) 
C16 0.0205(6) 0.0230(6) 0.0254(6) -0.0057(5) 0.0102(5) -0.0028(4) 
C17 0.0308(7) 0.0280(6) 0.0242(6) 0.0069(5) 0.0117(5) 0.0022(5) 
C18 0.0554(11) 0.0384(8) 0.0440(9) 0.0188(7) 0.0247(8) 0.0073(8) 
C19 0.0276(7) 0.0461(9) 0.0389(8) 0.0067(7) 0.0060(6) 0.0029(6) 
C20 0.0229(6) 0.0216(6) 0.0340(7) -0.0006(5) 0.0133(5) 0.0031(5) 
C21 0.0381(8) 0.0233(6) 0.0509(9) -0.0053(6) 0.0248(7) -0.0015(6) 
C22 0.0252(7) 0.0353(8) 0.0514(9) 0.0075(7) 0.0127(7) 0.0068(6) 
O1 0.0152(4) 0.0181(4) 0.0160(4) -0.0008(3) 0.0056(3) -0.0012(3) 
C31 0.0167(5) 0.0147(4) 0.0148(5) -0.0009(4) 0.0056(4) 0.0003(4) 
C32 0.0176(5) 0.0170(5) 0.0140(5) -0.0003(4) 0.0044(4) -0.0005(4) 
C33 0.0206(5) 0.0233(5) 0.0175(5) -0.0010(4) 0.0037(4) -0.0056(4) 
C34 0.0268(6) 0.0242(6) 0.0218(6) 0.0003(4) 0.0096(5) -0.0076(5) 
C35 0.0278(6) 0.0226(6) 0.0159(5) 0.0017(4) 0.0080(5) -0.0034(5) 
C36 0.0199(5) 0.0186(5) 0.0140(5) -0.0014(4) 0.0045(4) -0.0003(4) 
C37 0.0143(5) 0.0193(5) 0.0139(5) 0.0001(4) 0.0021(4) -0.0022(4) 
C38 0.0165(5) 0.0209(5) 0.0199(5) 0.0012(4) 0.0025(4) -0.0008(4) 
C39 0.0261(6) 0.0224(6) 0.0241(6) 0.0060(5) 0.0008(5) -0.0027(5) 
C40 0.0335(7) 0.0311(7) 0.0167(5) 0.0045(5) 0.0024(5) -0.0122(5) 
C41 0.0311(7) 0.0305(6) 0.0160(5) -0.0032(5) 0.0071(5) -0.0081(5) 
C42 0.0220(6) 0.0217(5) 0.0163(5) -0.0019(4) 0.0049(4) -0.0030(4) 
C43 0.0291(7) 0.0249(6) 0.0293(6) -0.0024(5) 0.0071(5) 0.0071(5) 
C44 0.0710(12) 0.0444(9) 0.0199(6) 0.0096(6) 0.0057(7) -0.0171(9) 
C45 0.0385(8) 0.0231(6) 0.0237(6) -0.0045(5) 0.0074(6) 0.0041(5) 
C46 0.0197(5) 0.0236(5) 0.0119(4) 0.0002(4) 0.0049(4) 0.0003(4) 
C47 0.0185(5) 0.0268(6) 0.0145(5) -0.0028(4) 0.0049(4) 0.0008(4) 
C48 0.0206(6) 0.0339(6) 0.0164(5) -0.0070(5) 0.0054(4) -0.0023(5) 
C49 0.0188(6) 0.0448(8) 0.0138(5) -0.0017(5) 0.0035(4) 0.0008(5) 
C50 0.0256(6) 0.0381(7) 0.0158(5) 0.0057(5) 0.0054(5) 0.0089(5) 
C51 0.0271(6) 0.0262(6) 0.0149(5) 0.0030(4) 0.0075(5) 0.0042(5) 
C52 0.0251(6) 0.0260(6) 0.0249(6) -0.0078(5) 0.0023(5) 0.0038(5) 
C53 0.0243(7) 0.0641(10) 0.0187(6) -0.0037(6) -0.0014(5) 0.0023(7) 
C54 0.0432(8) 0.0236(6) 0.0233(6) 0.0045(5) 0.0113(6) 0.0067(6) 
N2 0.0216(5) 0.0195(5) 0.0224(5) -0.0011(4) 0.0093(4) -0.0013(4) 
C61 0.0251(6) 0.0201(5) 0.0260(6) -0.0023(4) 0.0104(5) -0.0014(5) 
C62 0.0366(8) 0.0153(5) 0.0398(8) -0.0024(5) 0.0130(6) 0.0025(5) 
C63 0.0408(9) 0.0323(7) 0.0411(8) -0.0129(6) 0.0069(7) 0.0108(7) 
C64 0.0626(12) 0.0246(7) 0.0379(8) 0.0018(6) 0.0008(8) 0.0122(7) 
C65 0.0652(13) 0.0190(7) 0.0959(16) 0.0021(8) 0.0459(12) -0.0037(7) 
  
_geom_special_details 
; 
 All esds (except the esd in the dihedral angle between two l.s. planes) 
 are estimated using the full covariance matrix.  The cell esds are taken 
 into account individually in the estimation of esds in distances, angles 
 and torsion angles; correlations between esds in cell parameters are only 
 used when they are defined by crystal symmetry.  An approximate (isotropic) 
 treatment of cell esds is used for estimating esds involving l.s. planes. 
; 
  
loop_ 
 _geom_bond_atom_site_label_1 
 _geom_bond_atom_site_label_2 
 _geom_bond_distance 
 _geom_bond_site_symmetry_2 
 _geom_bond_publ_flag 
Cl1 Mo1 2.3852(6) . ? 
Mo1 N1 1.7504(10) . ? 
Mo1 C1 1.8904(13) . ? 
Mo1 O1 1.9747(9) . ? 
Mo1 N2 2.1732(11) . ? 
C1 C2 1.5178(18) . ? 
C1 H1 0.968(13) . ? 
C2 C3A 1.473(9) . ? 
C2 C4 1.514(5) . ? 
C2 C5A 1.537(5) . ? 
C2 C3 1.562(5) . ? 
C2 C5 1.563(3) . ? 
C2 C4A 1.576(9) . ? 
C3 H3A 0.9800 . ? 
C3 H3B 0.9800 . ? 
C3 H3C 0.9800 . ? 
C4 H4A 0.9800 . ? 
C4 H4B 0.9800 . ? 
C4 H4C 0.9800 . ? 
C5 C6 1.391(4) . ? 
C5 C10 1.392(4) . ? 
C6 C7 1.412(5) . ? 
C6 H6 0.9500 . ? 
C7 C8 1.370(6) . ? 
C7 H7 0.9500 . ? 
C8 C9 1.375(4) . ? 
C8 H8 0.9500 . ? 
C9 C10 1.397(3) . ? 
C9 H9 0.9500 . ? 
C10 H10 0.9500 . ? 
C3A H3A1 0.9800 . ? 
C3A H3A2 0.9800 . ? 
C3A H3A3 0.9800 . ? 
C4A H4A1 0.9800 . ? 
C4A H4A2 0.9800 . ? 
C4A H4A3 0.9800 . ? 
C5A C6A 1.371(6) . ? 
C5A C10A 1.380(7) . ? 
C6A C7A 1.392(6) . ? 
C6A H6A 0.9500 . ? 
C7A C8A 1.368(7) . ? 
C7A H7A 0.9500 . ? 
C8A C9A 1.365(8) . ? 
C8A H8A 0.9500 . ? 
C9A C10A 1.399(6) . ? 
C9A H9A 0.9500 . ? 
C10A H10A 0.9500 . ? 
N1 C11 1.3952(14) . ? 
C11 C16 1.4155(17) . ? 
C11 C12 1.4197(17) . ? 
C12 C13 1.3942(17) . ? 
C12 C17 1.5135(19) . ? 
C13 C14 1.384(2) . ? 
C13 H13 0.9500 . ? 
C14 C15 1.383(2) . ? 
C14 H14 0.9500 . ? 
C15 C16 1.3960(18) . ? 
C15 H15 0.9500 . ? 
C16 C20 1.5161(19) . ? 
C17 C19 1.535(2) . ? 
C17 C18 1.536(2) . ? 
C17 H17 1.0000 . ? 
C18 H18A 0.9800 . ? 
C18 H18B 0.9800 . ? 
C18 H18C 0.9800 . ? 
C19 H19A 0.9800 . ? 
C19 H19B 0.9800 . ? 
C19 H19C 0.9800 . ? 
C20 C22 1.535(2) . ? 
C20 C21 1.537(2) . ? 
C20 H20 1.0000 . ? 
C21 H21A 0.9800 . ? 
C21 H21B 0.9800 . ? 
C21 H21C 0.9800 . ? 
C22 H22A 0.9800 . ? 
C22 H22B 0.9800 . ? 
C22 H22C 0.9800 . ? 
O1 C31 1.3379(13) . ? 
C31 C32 1.4092(16) . ? 
C31 C36 1.4118(15) . ? 
C32 C33 1.3966(16) . ? 
C32 C37 1.4952(15) . ? 
C33 C34 1.3910(17) . ? 
C33 H33 0.9500 . ? 
C34 C35 1.3861(18) . ? 
C34 H34 0.9500 . ? 
C35 C36 1.3990(17) . ? 
C35 H35 0.9500 . ? 
C36 C46 1.4944(16) . ? 
C37 C42 1.4023(16) . ? 
C37 C38 1.4051(17) . ? 
C38 C39 1.3953(17) . ? 
C38 C43 1.5017(18) . ? 
C39 C40 1.391(2) . ? 
C39 H39 0.9500 . ? 
C40 C41 1.387(2) . ? 
C40 C44 1.5117(19) . ? 
C41 C42 1.3954(17) . ? 
C41 H41 0.9500 . ? 
C42 C45 1.5075(18) . ? 
C43 H43A 0.9800 . ? 
C43 H43B 0.9800 . ? 
C43 H43C 0.9800 . ? 
C44 H44A 0.9800 . ? 
C44 H44B 0.9800 . ? 
C44 H44C 0.9800 . ? 
C45 H45A 0.9800 . ? 
C45 H45B 0.9800 . ? 
C45 H45C 0.9800 . ? 
C46 C51 1.4058(17) . ? 
C46 C47 1.4086(17) . ? 
C47 C48 1.3975(17) . ? 
C47 C52 1.5103(18) . ? 
C48 C49 1.392(2) . ? 
C48 H48 0.9500 . ? 
C49 C50 1.387(2) . ? 
C49 C53 1.5119(18) . ? 
C50 C51 1.3964(18) . ? 
C50 H50 0.9500 . ? 
C51 C54 1.5089(19) . ? 
C52 H52A 0.9800 . ? 
C52 H52B 0.9800 . ? 
C52 H52C 0.9800 . ? 
C53 H53A 0.9800 . ? 
C53 H53B 0.9800 . ? 
C53 H53C 0.9800 . ? 
C54 H54A 0.9800 . ? 
C54 H54B 0.9800 . ? 
C54 H54C 0.9800 . ? 
N2 C61 1.1392(17) . ? 
C61 C62 1.4836(18) . ? 
C62 C63 1.528(2) . ? 
C62 C65 1.534(2) . ? 
C62 C64 1.534(2) . ? 
C63 H63A 0.9800 . ? 
C63 H63B 0.9800 . ? 
C63 H63C 0.9800 . ? 
C64 H64A 0.9800 . ? 
C64 H64B 0.9800 . ? 
C64 H64C 0.9800 . ? 
C65 H65A 0.9800 . ? 
C65 H65B 0.9800 . ? 
C65 H65C 0.9800 . ? 
  
loop_ 
 _geom_angle_atom_site_label_1 
 _geom_angle_atom_site_label_2 
 _geom_angle_atom_site_label_3 
 _geom_angle 
 _geom_angle_site_symmetry_1 
 _geom_angle_site_symmetry_3 
 _geom_angle_publ_flag 
N1 Mo1 C1 100.47(5) . . ? 
N1 Mo1 O1 154.67(4) . . ? 
C1 Mo1 O1 103.96(5) . . ? 
N1 Mo1 N2 93.60(4) . . ? 
C1 Mo1 N2 91.54(5) . . ? 
O1 Mo1 N2 79.23(4) . . ? 
N1 Mo1 Cl1 95.19(3) . . ? 
C1 Mo1 Cl1 103.39(4) . . ? 
O1 Mo1 Cl1 85.67(2) . . ? 
N2 Mo1 Cl1 160.97(3) . . ? 
C2 C1 Mo1 142.57(9) . . ? 
C2 C1 H1 112.8(10) . . ? 
Mo1 C1 H1 104.6(10) . . ? 
C3A C2 C1 113.0(6) . . ? 
C4 C2 C1 109.4(3) . . ? 
C3A C2 C5A 115.4(5) . . ? 
C1 C2 C5A 103.5(2) . . ? 
C4 C2 C3 106.6(4) . . ? 
C1 C2 C3 113.2(4) . . ? 
C4 C2 C5 113.8(2) . . ? 
C1 C2 C5 106.65(13) . . ? 
C3 C2 C5 107.3(3) . . ? 
C3A C2 C4A 111.7(7) . . ? 
C1 C2 C4A 102.4(5) . . ? 
C5A C2 C4A 109.9(4) . . ? 
C2 C3 H3A 109.5 . . ? 
C2 C3 H3B 109.5 . . ? 
H3A C3 H3B 109.5 . . ? 
C2 C3 H3C 109.5 . . ? 
H3A C3 H3C 109.5 . . ? 
H3B C3 H3C 109.5 . . ? 
C2 C4 H4A 109.5 . . ? 
C2 C4 H4B 109.5 . . ? 
H4A C4 H4B 109.5 . . ? 
C2 C4 H4C 109.5 . . ? 
H4A C4 H4C 109.5 . . ? 
H4B C4 H4C 109.5 . . ? 
C6 C5 C10 117.3(3) . . ? 
C6 C5 C2 120.4(2) . . ? 
C10 C5 C2 122.2(2) . . ? 
C5 C6 C7 121.0(3) . . ? 
C5 C6 H6 119.5 . . ? 
C7 C6 H6 119.5 . . ? 
C8 C7 C6 120.1(3) . . ? 
C8 C7 H7 120.0 . . ? 
C6 C7 H7 120.0 . . ? 
C7 C8 C9 119.9(3) . . ? 
C7 C8 H8 120.1 . . ? 
C9 C8 H8 120.1 . . ? 
C8 C9 C10 120.1(3) . . ? 
C8 C9 H9 120.0 . . ? 
C10 C9 H9 120.0 . . ? 
C5 C10 C9 121.6(3) . . ? 
C5 C10 H10 119.2 . . ? 
C9 C10 H10 119.2 . . ? 
C2 C3A H3A1 109.5 . . ? 
C2 C3A H3A2 109.5 . . ? 
H3A1 C3A H3A2 109.5 . . ? 
C2 C3A H3A3 109.5 . . ? 
H3A1 C3A H3A3 109.5 . . ? 
H3A2 C3A H3A3 109.5 . . ? 
C2 C4A H4A1 109.5 . . ? 
C2 C4A H4A2 109.5 . . ? 
H4A1 C4A H4A2 109.5 . . ? 
C2 C4A H4A3 109.5 . . ? 
H4A1 C4A H4A3 109.5 . . ? 
H4A2 C4A H4A3 109.5 . . ? 
C6A C5A C10A 118.5(5) . . ? 
C6A C5A C2 124.7(4) . . ? 
C10A C5A C2 116.8(4) . . ? 
C5A C6A C7A 119.7(5) . . ? 
C5A C6A H6A 120.1 . . ? 
C7A C6A H6A 120.1 . . ? 
C8A C7A C6A 121.9(5) . . ? 
C8A C7A H7A 119.0 . . ? 
C6A C7A H7A 119.0 . . ? 
C9A C8A C7A 118.4(5) . . ? 
C9A C8A H8A 120.8 . . ? 
C7A C8A H8A 120.8 . . ? 
C8A C9A C10A 120.2(5) . . ? 
C8A C9A H9A 119.9 . . ? 
C10A C9A H9A 119.9 . . ? 
C5A C10A C9A 121.1(5) . . ? 
C5A C10A H10A 119.4 . . ? 
C9A C10A H10A 119.4 . . ? 
C11 N1 Mo1 172.07(9) . . ? 
N1 C11 C16 118.77(11) . . ? 
N1 C11 C12 119.62(11) . . ? 
C16 C11 C12 121.59(11) . . ? 
C13 C12 C11 117.67(12) . . ? 
C13 C12 C17 121.69(12) . . ? 
C11 C12 C17 120.63(11) . . ? 
C14 C13 C12 121.32(13) . . ? 
C14 C13 H13 119.3 . . ? 
C12 C13 H13 119.3 . . ? 
C15 C14 C13 120.39(12) . . ? 
C15 C14 H14 119.8 . . ? 
C13 C14 H14 119.8 . . ? 
C14 C15 C16 121.32(13) . . ? 
C14 C15 H15 119.3 . . ? 
C16 C15 H15 119.3 . . ? 
C15 C16 C11 117.71(12) . . ? 
C15 C16 C20 119.99(12) . . ? 
C11 C16 C20 122.26(11) . . ? 
C12 C17 C19 110.13(12) . . ? 
C12 C17 C18 114.05(12) . . ? 
C19 C17 C18 109.75(13) . . ? 
C12 C17 H17 107.6 . . ? 
C19 C17 H17 107.6 . . ? 
C18 C17 H17 107.6 . . ? 
C17 C18 H18A 109.5 . . ? 
C17 C18 H18B 109.5 . . ? 
H18A C18 H18B 109.5 . . ? 
C17 C18 H18C 109.5 . . ? 
H18A C18 H18C 109.5 . . ? 
H18B C18 H18C 109.5 . . ? 
C17 C19 H19A 109.5 . . ? 
C17 C19 H19B 109.5 . . ? 
H19A C19 H19B 109.5 . . ? 
C17 C19 H19C 109.5 . . ? 
H19A C19 H19C 109.5 . . ? 
H19B C19 H19C 109.5 . . ? 
C16 C20 C22 113.07(11) . . ? 
C16 C20 C21 109.76(12) . . ? 
C22 C20 C21 110.26(12) . . ? 
C16 C20 H20 107.9 . . ? 
C22 C20 H20 107.9 . . ? 
C21 C20 H20 107.9 . . ? 
C20 C21 H21A 109.5 . . ? 
C20 C21 H21B 109.5 . . ? 
H21A C21 H21B 109.5 . . ? 
C20 C21 H21C 109.5 . . ? 
H21A C21 H21C 109.5 . . ? 
H21B C21 H21C 109.5 . . ? 
C20 C22 H22A 109.5 . . ? 
C20 C22 H22B 109.5 . . ? 
H22A C22 H22B 109.5 . . ? 
C20 C22 H22C 109.5 . . ? 
H22A C22 H22C 109.5 . . ? 
H22B C22 H22C 109.5 . . ? 
C31 O1 Mo1 145.27(7) . . ? 
O1 C31 C32 119.57(10) . . ? 
O1 C31 C36 119.93(10) . . ? 
C32 C31 C36 120.48(10) . . ? 
C33 C32 C31 118.96(10) . . ? 
C33 C32 C37 120.23(10) . . ? 
C31 C32 C37 120.81(10) . . ? 
C34 C33 C32 121.17(11) . . ? 
C34 C33 H33 119.4 . . ? 
C32 C33 H33 119.4 . . ? 
C35 C34 C33 119.29(11) . . ? 
C35 C34 H34 120.4 . . ? 
C33 C34 H34 120.4 . . ? 
C34 C35 C36 121.69(11) . . ? 
C34 C35 H35 119.2 . . ? 
C36 C35 H35 119.2 . . ? 
C35 C36 C31 118.40(11) . . ? 
C35 C36 C46 119.36(10) . . ? 
C31 C36 C46 122.23(10) . . ? 
C42 C37 C38 119.41(10) . . ? 
C42 C37 C32 120.32(10) . . ? 
C38 C37 C32 120.22(10) . . ? 
C39 C38 C37 119.43(11) . . ? 
C39 C38 C43 120.36(12) . . ? 
C37 C38 C43 120.20(11) . . ? 
C40 C39 C38 121.73(12) . . ? 
C40 C39 H39 119.1 . . ? 
C38 C39 H39 119.1 . . ? 
C41 C40 C39 118.08(12) . . ? 
C41 C40 C44 120.75(14) . . ? 
C39 C40 C44 121.17(14) . . ? 
C40 C41 C42 121.89(12) . . ? 
C40 C41 H41 119.1 . . ? 
C42 C41 H41 119.1 . . ? 
C41 C42 C37 119.43(12) . . ? 
C41 C42 C45 119.62(11) . . ? 
C37 C42 C45 120.94(11) . . ? 
C38 C43 H43A 109.5 . . ? 
C38 C43 H43B 109.5 . . ? 
H43A C43 H43B 109.5 . . ? 
C38 C43 H43C 109.5 . . ? 
H43A C43 H43C 109.5 . . ? 
H43B C43 H43C 109.5 . . ? 
C40 C44 H44A 109.5 . . ? 
C40 C44 H44B 109.5 . . ? 
H44A C44 H44B 109.5 . . ? 
C40 C44 H44C 109.5 . . ? 
H44A C44 H44C 109.5 . . ? 
H44B C44 H44C 109.5 . . ? 
C42 C45 H45A 109.5 . . ? 
C42 C45 H45B 109.5 . . ? 
H45A C45 H45B 109.5 . . ? 
C42 C45 H45C 109.5 . . ? 
H45A C45 H45C 109.5 . . ? 
H45B C45 H45C 109.5 . . ? 
C51 C46 C47 119.63(11) . . ? 
C51 C46 C36 119.56(11) . . ? 
C47 C46 C36 120.76(10) . . ? 
C48 C47 C46 119.36(11) . . ? 
C48 C47 C52 118.80(11) . . ? 
C46 C47 C52 121.84(11) . . ? 
C49 C48 C47 121.48(12) . . ? 
C49 C48 H48 119.3 . . ? 
C47 C48 H48 119.3 . . ? 
C50 C49 C48 118.43(12) . . ? 
C50 C49 C53 120.21(13) . . ? 
C48 C49 C53 121.35(14) . . ? 
C49 C50 C51 121.92(12) . . ? 
C49 C50 H50 119.0 . . ? 
C51 C50 H50 119.0 . . ? 
C50 C51 C46 119.15(12) . . ? 
C50 C51 C54 118.58(12) . . ? 
C46 C51 C54 122.26(11) . . ? 
C47 C52 H52A 109.5 . . ? 
C47 C52 H52B 109.5 . . ? 
H52A C52 H52B 109.5 . . ? 
C47 C52 H52C 109.5 . . ? 
H52A C52 H52C 109.5 . . ? 
H52B C52 H52C 109.5 . . ? 
C49 C53 H53A 109.5 . . ? 
C49 C53 H53B 109.5 . . ? 
H53A C53 H53B 109.5 . . ? 
C49 C53 H53C 109.5 . . ? 
H53A C53 H53C 109.5 . . ? 
H53B C53 H53C 109.5 . . ? 
C51 C54 H54A 109.5 . . ? 
C51 C54 H54B 109.5 . . ? 
H54A C54 H54B 109.5 . . ? 
C51 C54 H54C 109.5 . . ? 
H54A C54 H54C 109.5 . . ? 
H54B C54 H54C 109.5 . . ? 
C61 N2 Mo1 177.43(10) . . ? 
N2 C61 C62 177.93(14) . . ? 
C61 C62 C63 108.41(12) . . ? 
C61 C62 C65 107.30(12) . . ? 
C63 C62 C65 111.91(14) . . ? 
C61 C62 C64 107.53(12) . . ? 
C63 C62 C64 110.70(14) . . ? 
C65 C62 C64 110.80(16) . . ? 
C62 C63 H63A 109.5 . . ? 
C62 C63 H63B 109.5 . . ? 
H63A C63 H63B 109.5 . . ? 
C62 C63 H63C 109.5 . . ? 
H63A C63 H63C 109.5 . . ? 
H63B C63 H63C 109.5 . . ? 
C62 C64 H64A 109.5 . . ? 
C62 C64 H64B 109.5 . . ? 
H64A C64 H64B 109.5 . . ? 
C62 C64 H64C 109.5 . . ? 
H64A C64 H64C 109.5 . . ? 
H64B C64 H64C 109.5 . . ? 
C62 C65 H65A 109.5 . . ? 
C62 C65 H65B 109.5 . . ? 
H65A C65 H65B 109.5 . . ? 
C62 C65 H65C 109.5 . . ? 
H65A C65 H65C 109.5 . . ? 
H65B C65 H65C 109.5 . . ? 
  
_refine_diff_density_max    0.417 
_refine_diff_density_min   -0.418 
_refine_diff_density_rms    0.052 
  
_shelxl_version_number 2014/6 
  
_shelx_res_file 
; 
TITL X16049 in P2(1)/n 
CELL 0.71073  20.72920  11.10660  21.68880  90.0000 110.0240  90.0000 
ZERR    4.00   0.00450   0.00240   0.00480   0.0000   0.0044   0.0000 
LATT  1 
SYMM 0.5-X, 0.5+Y, 0.5-Z 
SFAC C H N O CL MO 
UNIT 204 252 8 4 4 4 
TEMP -173 
SIZE 0.225 0.275 0.515 
  
wpdb -2 
acta 
  
DFIX 0.95 c1 h1 
  
L.S. 10 
BOND $H 
FMAP 2 
PLAN 20 
  
simu 0.02 c2 > c10a 
rigu c2 > c10a 
  
WGHT    0.029500    2.417800 
FVAR       0.09900   0.63051 
CL1   5    0.758441    0.163260    0.486065    11.00000    0.02991    0.01583 = 
         0.03435    0.00215    0.01866    0.00131 
MO1   6    0.759431    0.377687    0.480378    11.00000    0.01489    0.01451 = 
         0.01420   -0.00009    0.00577    0.00027 
REM  ---------------------------------------------------- 
sadi c2 c3 c2 c4 c2 c3a c2 c4a 
sadi c2 c5 c2 c5a 
sadi c5 c6 c5 c10 c5a c6a c5a c10a 
sadi c6 c7 c9 c10 c6a c7a c9a c10a 
sadi c7 c8 c8 c9 c7a c8a c8a c9a 
sadi 0.04 c1 c3 c1 c4 c1 c3a c1 c4a 
sadi 0.04 c1 c5 c1 c5a 
sadi 0.04 c3 c4 c3a c4a 
sadi 0.04 c2 c6 c2 c10 c2 c6a c2 c10a 
sadi 0.04 c5 c3 c5 c4 c5a c3a c5a c4a 
sadi 0.04 c5 c7 c5 c9 c5a c7a c5a c9a 
sadi 0.04 c6 c8 c8 c10 c6a c8a c8a c10a 
sadi 0.04 c7 c9 c7a c9a 
sadi 0.04 c3 c3a c4 c4a c5 c5a 
flat c2 c5 c6 c7 c8 c9 c10 
flat c2 c5a c6a c7a c8a c9a c10a 
REM  eadp c3 c3a 
REM  eadp c4 c4a 
C1    1    0.826828    0.422442    0.560823    11.00000    0.02080    0.02390 = 
         0.01867   -0.00118    0.00670    0.00074 
H1    2    0.804485    0.412580    0.593072    11.00000   -1.20000 
REM  Q1    1   0.8028  0.4116  0.5928  11.00000  0.05    0.94 
C2    1    0.899758    0.469320    0.590340    11.00000    0.02021    0.03148 = 
         0.02128   -0.00444    0.00334   -0.00052 
part 1 
C3    1    0.934256    0.494859    0.537958    21.00000    0.02029    0.01826 = 
         0.02846   -0.00198    0.00954   -0.00349 
AFIX 137 
H3A   2    0.979816    0.530044    0.559441    21.00000   -1.50000 
H3B   2    0.905783    0.551243    0.505097    21.00000   -1.50000 
H3C   2    0.938817    0.419316    0.516464    21.00000   -1.50000 
AFIX   0 
C4    1    0.943789    0.376030    0.636767    21.00000    0.02416    0.03906 = 
         0.02675    0.00663    0.00163    0.00091 
AFIX 137 
H4A   2    0.922842    0.354447    0.669481    21.00000   -1.50000 
H4B   2    0.989748    0.409127    0.658962    21.00000   -1.50000 
H4C   2    0.947285    0.304117    0.611918    21.00000   -1.50000 
AFIX   0 
C5    1    0.895321    0.591870    0.624045    21.00000    0.01643    0.03389 = 
         0.02172   -0.00835    0.00490   -0.00576 
C6    1    0.912938    0.598808    0.691865    21.00000    0.05754    0.04352 = 
         0.02994   -0.00731    0.01926   -0.01330 
AFIX  43 
H6    2    0.929581    0.529104    0.717832    21.00000   -1.20000 
AFIX   0 
C7    1    0.906462    0.707853    0.722703    21.00000    0.05993    0.06387 = 
         0.04237   -0.02472    0.02508   -0.01516 
AFIX  43 
H7    2    0.919454    0.711398    0.769135    21.00000   -1.20000 
AFIX   0 
C8    1    0.881466    0.808574    0.685754    21.00000    0.04054    0.05320 = 
         0.05854   -0.03580    0.01530   -0.00570 
AFIX  43 
H8    2    0.875724    0.881235    0.706402    21.00000   -1.20000 
AFIX   0 
C9    1    0.864719    0.804236    0.618743    21.00000    0.03154    0.03678 = 
         0.05489   -0.02089   -0.00216    0.00607 
AFIX  43 
H9    2    0.848691    0.874609    0.593181    21.00000   -1.20000 
AFIX   0 
C10   1    0.871239    0.696480    0.588194    21.00000    0.02883    0.03163 = 
         0.03255   -0.01178    0.00024    0.00374 
AFIX  43 
H10   2    0.858932    0.694530    0.541794    21.00000   -1.20000 
AFIX   0 
part 2 
C3A   1    0.926566    0.518808    0.540880   -21.00000    0.02878    0.02656 = 
         0.03192    0.00078    0.00125   -0.00837 
AFIX 137 
H3A1  2    0.927492    0.455324    0.509813   -21.00000   -1.50000 
H3A2  2    0.973191    0.549413    0.562701   -21.00000   -1.50000 
H3A3  2    0.896850    0.584610    0.517222   -21.00000   -1.50000 
AFIX   0 
C4A   1    0.940474    0.353570    0.624331   -21.00000    0.02071    0.04992 = 
         0.01849    0.00263   -0.00171   -0.00173 
AFIX 137 
H4A1  2    0.920686    0.322205    0.656168   -21.00000   -1.50000 
H4A2  2    0.988773    0.374415    0.646965   -21.00000   -1.50000 
H4A3  2    0.937288    0.292096    0.591001   -21.00000   -1.50000 
AFIX   0 
C5A   1    0.895529    0.559034    0.642793   -21.00000    0.02746    0.03486 = 
         0.02098   -0.00389    0.00321   -0.00897 
C6A   1    0.935645    0.554493    0.707815   -21.00000    0.02336    0.05032 = 
         0.01856   -0.00610    0.00902   -0.00851 
AFIX  43 
H6A   2    0.966493    0.489303    0.723976   -21.00000   -1.20000 
AFIX   0 
C7A   1    0.930981    0.645824    0.750060   -21.00000    0.02666    0.06041 = 
         0.03302   -0.01731    0.01240   -0.01279 
AFIX  43 
H7A   2    0.961565    0.645260    0.794190   -21.00000   -1.20000 
AFIX   0 
C8A   1    0.883623    0.736380    0.729863   -21.00000    0.04053    0.04971 = 
         0.05293   -0.02111    0.01002   -0.00539 
AFIX  43 
H8A   2    0.879119    0.794955    0.760051   -21.00000   -1.20000 
AFIX   0 
C9A   1    0.843011    0.740571    0.665331   -21.00000    0.08777    0.04230 = 
         0.05850   -0.02831   -0.01353    0.01734 
AFIX  43 
H9A   2    0.810627    0.803852    0.649960   -21.00000   -1.20000 
AFIX   0 
C10A  1    0.848946    0.651946    0.621773   -21.00000    0.07400    0.03476 = 
         0.03786   -0.01654   -0.01736    0.01036 
AFIX  43 
H10A  2    0.820424    0.655785    0.576960   -21.00000   -1.20000 
AFIX   0 
part 0 
REM  ---------------------------------------------------- 
N1    3    0.807643    0.384005    0.428124    11.00000    0.01716    0.01569 = 
         0.01812    0.00015    0.00683    0.00010 
C11   1    0.840137    0.376390    0.381563    11.00000    0.01798    0.02064 = 
         0.01835   -0.00379    0.00831   -0.00417 
C12   1    0.822425    0.458927    0.328383    11.00000    0.02367    0.02543 = 
         0.01923   -0.00137    0.00912   -0.00542 
C13   1    0.857907    0.450747    0.284323    11.00000    0.03288    0.03866 = 
         0.02176   -0.00114    0.01382   -0.00842 
AFIX  43 
H13   2    0.846835    0.504597    0.248153    11.00000   -1.20000 
AFIX   0 
C14   1    0.908941    0.365738    0.292224    11.00000    0.03411    0.04666 = 
         0.02877   -0.00931    0.02122   -0.00807 
AFIX  43 
H14   2    0.932728    0.362401    0.261806    11.00000   -1.20000 
AFIX   0 
C15   1    0.925507    0.285627    0.344142    11.00000    0.02647    0.03560 = 
         0.03364   -0.00982    0.01664   -0.00145 
AFIX  43 
H15   2    0.960654    0.227817    0.348861    11.00000   -1.20000 
AFIX   0 
C16   1    0.891613    0.288017    0.389749    11.00000    0.02055    0.02304 = 
         0.02542   -0.00573    0.01021   -0.00279 
C17   1    0.766206    0.551012    0.319870    11.00000    0.03084    0.02804 = 
         0.02422    0.00694    0.01171    0.00222 
AFIX  13 
H17   2    0.770134    0.580812    0.364520    11.00000   -1.20000 
AFIX   0 
C18   1    0.770933    0.660800    0.278587    11.00000    0.05544    0.03842 = 
         0.04400    0.01879    0.02470    0.00734 
AFIX 137 
H18A  2    0.816176    0.698438    0.297820    11.00000   -1.50000 
H18B  2    0.735186    0.719023    0.277945    11.00000   -1.50000 
H18C  2    0.764454    0.635002    0.233650    11.00000   -1.50000 
AFIX   0 
C19   1    0.695507    0.491451    0.289942    11.00000    0.02760    0.04611 = 
         0.03892    0.00671    0.00600    0.00286 
AFIX 137 
H19A  2    0.690011    0.461642    0.245902    11.00000   -1.50000 
H19B  2    0.659535    0.550631    0.287103    11.00000   -1.50000 
H19C  2    0.691828    0.424047    0.317709    11.00000   -1.50000 
AFIX   0 
C20   1    0.908495    0.194929    0.444105    11.00000    0.02292    0.02157 = 
         0.03403   -0.00057    0.01325    0.00310 
AFIX  13 
H20   2    0.886509    0.221100    0.476362    11.00000   -1.20000 
AFIX   0 
C21   1    0.877399    0.072728    0.415812    11.00000    0.03815    0.02329 = 
         0.05088   -0.00530    0.02476   -0.00152 
AFIX 137 
H21A  2    0.827841    0.081761    0.393281    11.00000   -1.50000 
H21B  2    0.885751    0.014230    0.451530    11.00000   -1.50000 
H21C  2    0.898780    0.044292    0.384586    11.00000   -1.50000 
AFIX   0 
C22   1    0.985875    0.181990    0.481092    11.00000    0.02519    0.03533 = 
         0.05144    0.00752    0.01266    0.00683 
AFIX 137 
H22A  2    1.008162    0.150191    0.451291    11.00000   -1.50000 
H22B  2    0.993497    0.126586    0.518080    11.00000   -1.50000 
H22C  2    1.005373    0.260931    0.497519    11.00000   -1.50000 
AFIX   0 
REM  ---------------------------------------------------- 
O1    4    0.673680    0.370648    0.500766    11.00000    0.01522    0.01809 = 
         0.01600   -0.00077    0.00565   -0.00120 
C31   1    0.627125    0.298147    0.511595    11.00000    0.01675    0.01473 = 
         0.01484   -0.00089    0.00561    0.00034 
C32   1    0.566559    0.269371    0.459427    11.00000    0.01764    0.01704 = 
         0.01400   -0.00028    0.00436   -0.00048 
C33   1    0.518123    0.194459    0.471556    11.00000    0.02056    0.02335 = 
         0.01750   -0.00101    0.00365   -0.00560 
AFIX  43 
H33   2    0.477396    0.173998    0.436519    11.00000   -1.20000 
AFIX   0 
C34   1    0.528453    0.149274    0.534027    11.00000    0.02678    0.02419 = 
         0.02177    0.00028    0.00963   -0.00759 
AFIX  43 
H34   2    0.495061    0.098537    0.541656    11.00000   -1.20000 
AFIX   0 
C35   1    0.587989    0.179068    0.585027    11.00000    0.02781    0.02257 = 
         0.01595    0.00172    0.00798   -0.00339 
AFIX  43 
H35   2    0.594894    0.148262    0.627676    11.00000   -1.20000 
AFIX   0 
C36   1    0.638171    0.253340    0.575310    11.00000    0.01994    0.01860 = 
         0.01399   -0.00138    0.00447   -0.00027 
C37   1    0.554289    0.317072    0.391895    11.00000    0.01435    0.01935 = 
         0.01394    0.00007    0.00213   -0.00222 
C38   1    0.532886    0.436742    0.376404    11.00000    0.01655    0.02087 = 
         0.01989    0.00124    0.00253   -0.00083 
C39   1    0.517265    0.477386    0.312057    11.00000    0.02611    0.02239 = 
         0.02408    0.00600    0.00080   -0.00271 
AFIX  43 
H39   2    0.501879    0.557864    0.301612    11.00000   -1.20000 
AFIX   0 
C40   1    0.523629    0.403148    0.262796    11.00000    0.03352    0.03110 = 
         0.01671    0.00452    0.00236   -0.01218 
C41   1    0.546489    0.286199    0.279304    11.00000    0.03110    0.03048 = 
         0.01602   -0.00317    0.00714   -0.00815 
AFIX  43 
H41   2    0.552281    0.235100    0.246461    11.00000   -1.20000 
AFIX   0 
C42   1    0.561224    0.241440    0.342767    11.00000    0.02202    0.02166 = 
         0.01635   -0.00185    0.00490   -0.00302 
C43   1    0.525436    0.519261    0.428403    11.00000    0.02905    0.02490 = 
         0.02925   -0.00245    0.00707    0.00710 
AFIX 137 
H43A  2    0.504363    0.595061    0.408207    11.00000   -1.50000 
H43B  2    0.570802    0.535622    0.460910    11.00000   -1.50000 
H43C  2    0.496279    0.480953    0.450027    11.00000   -1.50000 
AFIX   0 
C44   1    0.505207    0.447609    0.193003    11.00000    0.07099    0.04444 = 
         0.01989    0.00955    0.00569   -0.01707 
AFIX 137 
H44A  2    0.457114    0.428185    0.168453    11.00000   -1.50000 
H44B  2    0.534834    0.408454    0.172174    11.00000   -1.50000 
H44C  2    0.511730    0.535013    0.193137    11.00000   -1.50000 
AFIX   0 
C45   1    0.582874    0.111928    0.357229    11.00000    0.03849    0.02309 = 
         0.02368   -0.00446    0.00735    0.00413 
AFIX 137 
H45A  2    0.546974    0.067425    0.367459    11.00000   -1.50000 
H45B  2    0.625754    0.108265    0.394831    11.00000   -1.50000 
H45C  2    0.589968    0.075899    0.318800    11.00000   -1.50000 
AFIX   0 
C46   1    0.702017    0.280365    0.631822    11.00000    0.01972    0.02363 = 
         0.01186    0.00024    0.00491    0.00029 
C47   1    0.714569    0.396983    0.658836    11.00000    0.01851    0.02679 = 
         0.01447   -0.00282    0.00490    0.00077 
C48   1    0.772668    0.417658    0.714150    11.00000    0.02064    0.03390 = 
         0.01645   -0.00697    0.00536   -0.00230 
AFIX  43 
H48   2    0.781143    0.496416    0.732221    11.00000   -1.20000 
AFIX   0 
C49   1    0.818387    0.325468    0.743355    11.00000    0.01879    0.04481 = 
         0.01377   -0.00165    0.00355    0.00080 
C50   1    0.806120    0.211742    0.715267    11.00000    0.02559    0.03814 = 
         0.01582    0.00573    0.00540    0.00888 
AFIX  43 
H50   2    0.837774    0.148799    0.734092    11.00000   -1.20000 
AFIX   0 
C51   1    0.748601    0.187113    0.660131    11.00000    0.02705    0.02619 = 
         0.01486    0.00300    0.00755    0.00422 
C52   1    0.666456    0.500603    0.630169    11.00000    0.02505    0.02603 = 
         0.02492   -0.00782    0.00231    0.00381 
AFIX 137 
H52A  2    0.686441    0.575332    0.652683    11.00000   -1.50000 
H52B  2    0.622268    0.485727    0.635934    11.00000   -1.50000 
H52C  2    0.659441    0.507986    0.583290    11.00000   -1.50000 
AFIX   0 
C53   1    0.879294    0.346741    0.805111    11.00000    0.02430    0.06406 = 
         0.01867   -0.00375   -0.00136    0.00232 
AFIX 137 
H53A  2    0.866735    0.326665    0.843530    11.00000   -1.50000 
H53B  2    0.892955    0.431549    0.807331    11.00000   -1.50000 
H53C  2    0.917672    0.295798    0.804501    11.00000   -1.50000 
AFIX   0 
C54   1    0.739293    0.061175    0.632365    11.00000    0.04316    0.02364 = 
         0.02334    0.00449    0.01130    0.00667 
AFIX 137 
H54A  2    0.782674    0.016986    0.650037    11.00000   -1.50000 
H54B  2    0.725440    0.065075    0.584439    11.00000   -1.50000 
H54C  2    0.703719    0.019670    0.644586    11.00000   -1.50000 
AFIX   0 
REM  ---------------------------------------------------- 
N2    3    0.724063    0.562562    0.460549    11.00000    0.02163    0.01952 = 
         0.02244   -0.00115    0.00933   -0.00128 
C61   1    0.704586    0.659187    0.452047    11.00000    0.02511    0.02007 = 
         0.02596   -0.00225    0.01042   -0.00144 
C62   1    0.680657    0.785650    0.439366    11.00000    0.03662    0.01526 = 
         0.03984   -0.00237    0.01297    0.00254 
C63   1    0.667354    0.833302    0.499995    11.00000    0.04084    0.03233 = 
         0.04107   -0.01293    0.00694    0.01077 
AFIX 137 
H63A  2    0.632032    0.784024    0.508406    11.00000   -1.50000 
H63B  2    0.651622    0.916987    0.492483    11.00000   -1.50000 
H63C  2    0.709874    0.829463    0.537992    11.00000   -1.50000 
AFIX   0 
C64   1    0.614213    0.785378    0.379605    11.00000    0.06261    0.02464 = 
         0.03791    0.00181    0.00078    0.01221 
AFIX 137 
H64A  2    0.623272    0.750645    0.341838    11.00000   -1.50000 
H64B  2    0.597605    0.868145    0.369392    11.00000   -1.50000 
H64C  2    0.579325    0.737171    0.389418    11.00000   -1.50000 
AFIX   0 
C65   1    0.737156    0.857090    0.424843    11.00000    0.06523    0.01904 = 
         0.09588    0.00215    0.04587   -0.00372 
AFIX 137 
H65A  2    0.779570    0.853529    0.462967    11.00000   -1.50000 
H65B  2    0.722724    0.941166    0.415647    11.00000   -1.50000 
H65C  2    0.745270    0.822215    0.386638    11.00000   -1.50000 
  
AFIX   0 
HKLF 4 
  
REM  X16049 in P2(1)/n 
REM R1 =  0.0261 for   12598 Fo > 4sig(Fo)  and  0.0317 for all   14282 data 
REM    598 parameters refined using    418 restraints 
  
END 
  
WGHT      0.0295      2.4178 
  
REM Highest difference peak  0.417,  deepest hole -0.418,  1-sigma level  0.052 
Q1    1   0.6114  0.2222  0.5801  11.00000  0.05    0.42 
Q2    1   0.7381  0.1649  0.4398  11.00000  0.05    0.41 
Q3    1   0.5964  0.2895  0.4866  11.00000  0.05    0.41 
Q4    1   0.5222  0.1777  0.5035  11.00000  0.05    0.40 
Q5    1   0.5518  0.3788  0.3867  11.00000  0.05    0.40 
Q6    1   0.6306  0.2761  0.5428  11.00000  0.05    0.40 
Q7    1   0.8165  0.2771  0.7220  11.00000  0.05    0.37 
Q8    1   0.5595  0.2949  0.4245  11.00000  0.05    0.37 
Q9    1   0.7475  0.4016  0.6859  11.00000  0.05    0.37 
Q10   1   0.7286  0.2349  0.6456  11.00000  0.05    0.36 
Q11   1   0.7732  0.1995  0.6884  11.00000  0.05    0.36 
Q12   1   0.8689  0.4481  0.5791  11.00000  0.05    0.36 
Q13   1   0.5278  0.3409  0.2702  11.00000  0.05    0.36 
Q14   1   0.5414  0.2322  0.4629  11.00000  0.05    0.36 
Q15   1   0.5541  0.2733  0.3661  11.00000  0.05    0.36 
Q16   1   0.8682  0.3363  0.3902  11.00000  0.05    0.35 
Q17   1   0.5313  0.4569  0.3460  11.00000  0.05    0.35 
Q18   1   0.7070  0.3315  0.6476  11.00000  0.05    0.34 
Q19   1   0.5511  0.2672  0.3114  11.00000  0.05    0.34 
Q20   1   0.8420  0.4258  0.3583  11.00000  0.05    0.34 
; 
_shelx_res_checksum   78809 
  
_shelx_hkl_file 
; 
  -1   0   0   -0.72    0.01 
  -2   0   0  483.71    9.70 
  -2   0   0  488.76    9.93 
  -2   0   0  466.05    9.77 
  -2   0   0  479.65    9.67 
  -2   0   0  472.76    9.67 
  -3   0   0   -0.41    0.03 
  -3   0   0   -0.38    0.05 
  -3   0   0   -0.08    0.08 
  -3   0   0   -0.37    0.04 
  -3   0   0   -0.31    0.03 
  -3   0   0   -0.40    0.03 
  -4   0   0  284.52    5.75 
  -4   0   0  273.23    5.68 
  -4   0   0  280.55    5.72 
  -4   0   0  283.10    5.80 
  -4   0   0  284.61    5.77 
  -4   0   0  276.01    5.65 
  -5   0   0    1.66    0.11 
  -6   0   0  347.87    7.00 
  -6   0   0  338.14    7.00 
  -6   0   0  342.51    7.00 
  -6   0   0  351.74    7.23 
  -6   0   0  341.80    7.10 
  -6   0   0  355.19    7.18 
  -7   0   0    0.35    0.14 
  -7   0   0    0.28    0.08 
  -8   0   0  144.09    3.16 
  -8   0   0  145.76    3.04 
  -8   0   0  142.74    3.32 
  -8   0   0  142.78    3.04 
  -8   0   0  145.42    3.26 
  -8   0   0  143.73    3.06 
   8   0   0  143.03    2.95 
  -8   0   0  140.67    3.02 
  -9   0   0    0.06    0.11 
  -9   0   0    0.23    0.07 
  -9   0   0    0.65    0.11 
  -9   0   0    0.04    0.07 
  -9   0   0    0.06    0.10 
  -9   0   0    0.15    0.07 
  -9   0   0    0.18    0.10 
 -10   0   0   52.77    1.25 
 -10   0   0   53.57    1.32 
  10   0   0   53.01    1.44 
 -10   0   0   52.94    1.41 
 -10   0   0   54.46    1.28 
 -10   0   0   52.82    1.58 
 -10   0   0   53.07    1.29 
  10   0   0   53.24    1.27 
 -10   0   0   52.30    1.51 
 -11   0   0    0.47    0.18 
 -11   0   0    0.77    0.13 
 -11   0   0    0.75    0.20 
 -12   0   0  132.10    3.22 
 -12   0   0  131.24    2.85 
  12   0   0  131.90    3.11 
  12   0   0  129.65    2.87 
 -12   0   0  136.12    3.35 
 -12   0   0  130.16    2.88 
 -12   0   0  131.06    2.91 
 -12   0   0  132.53    3.08 
  13   0   0    0.52    0.13 
  13   0   0    0.86    0.20 
 -13   0   0    0.31    0.19 
 -13   0   0    0.44    0.20 
 -14   0   0  104.81    2.44 
 -14   0   0  102.21    2.37 
 -14   0   0   99.90    2.74 
 -14   0   0  109.23    2.34 
  14   0   0  105.04    2.65 
 -14   0   0  107.70    2.92 
 -14   0   0  105.65    2.62 
 -15   0   0    0.35    0.22 
  15   0   0    0.38    0.17 
 -15   0   0    0.63    0.13 
 -15   0   0    0.40    0.17 
 -15   0   0    0.57    0.15 
 -15   0   0    0.29    0.19 
 -15   0   0    0.35    0.10 
 -16   0   0   59.48    1.56 
 -16   0   0   55.63    1.70 
  16   0   0   57.65    1.76 
 -16   0   0   57.36    1.44 
 -16   0   0   57.35    2.00 
 -16   0   0   60.39    1.90 
 -16   0   0   58.70    1.40 
 -17   0   0    0.28    0.28 
 -17   0   0    0.73    0.28 
  17   0   0    0.65    0.23 
 -17   0   0    0.97    0.25 
 -18   0   0   17.15    0.55 
 -18   0   0   15.44    1.00 
 -18   0   0   16.56    0.57 
  18   0   0   16.85    0.86 
 -18   0   0   16.89    0.71 
 -18   0   0   18.48    0.97 
 -19   0   0    0.25    0.26 
 -19   0   0    0.58    0.32 
 -19   0   0    0.64    0.19 
  19   0   0    0.42    0.23 
 -19   0   0    0.29    0.10 
 -20   0   0    0.19    0.26 
 -20   0   0    0.36    0.25 
  20   0   0    0.69    0.27 
 -21   0   0    0.39    0.29 
 -21   0   0    0.37    0.35 
 -22   0   0    6.08    0.77 
 -22   0   0    6.24    0.87 
 -23   0   0    0.38    0.37 
 -23   0   0    0.32    0.30 
 -24   0   0    0.36    0.33 
 -24   0   0    0.63    0.42 
 -25   0   0    0.07    0.30 
 -25   0   0    0.06    0.33 
 -26   0   0    4.37    0.82 
 -26   0   0    5.03    0.78 
 -27   0   0   -0.15    0.34 
 -27   0   0    0.44    0.44 
   0  -1   0   -0.08    0.03 
   0  -1   0    0.10    0.04 
   0  -1   0   -0.13    0.02 
   0  -1   0   -0.15    0.02 
   0   1   0   -0.02    0.03 
   0   1   0   -0.17    0.01 
   0   1   0   -0.16    0.02 
   1  -1   0   25.83    0.61 
  -1  -1   0   25.61    0.58 
   1  -1   0   25.08    0.61 
  -1  -1   0   25.91    0.58 
  -1  -1   0   24.56    0.59 
   1  -1   0   24.53    0.57 
  -1  -1   0   26.14    0.58 
  -1  -1   0   24.96    0.58 
  -1  -1   0   25.00    0.58 
  -1  -1   0   24.96    0.58 
   1   1   0   25.11    0.57 
  -1   1   0   25.48    0.60 
   1   1   0   24.90    0.57 
  -1   1   0   25.30    0.60 
  -2  -1   0    1.06    0.07 
   2  -1   0    1.11    0.09 
   2  -1   0    0.98    0.09 
  -2  -1   0    1.20    0.07 
   2  -1   0    1.10    0.07 
  -2  -1   0    1.22    0.10 
  -2  -1   0    1.12    0.09 
  -2  -1   0    1.21    0.08 
  -2  -1   0    1.22    0.08 
  -2   1   0    1.07    0.09 
  -2   1   0    1.15    0.09 
  -2   1   0    1.50    0.10 
   2   1   0    1.16    0.07 
   2   1   0    1.07    0.08 
   3  -1   0  195.42    3.99 
  -3  -1   0  191.93    3.93 
  -3  -1   0  191.12    3.91 
   3  -1   0  195.71    3.96 
  -3  -1   0  196.79    3.99 
  -3  -1   0  192.04    4.03 
  -3  -1   0  190.95    3.92 
  -3  -1   0  194.67    3.90 
  -3  -1   0  192.31    3.93 
  -3   1   0  191.56    3.99 
  -3   1   0  190.76    3.97 
  -3   1   0  190.24    4.02 
   3   1   0  191.85    3.91 
   3   1   0  196.40    3.95 
  -3   1   0  191.76    3.98 
  -3   1   0  195.85    3.98 
  -4  -1   0  268.15    5.42 
  -4  -1   0  268.98    5.51 
  -4  -1   0  266.66    5.36 
  -4  -1   0  268.46    5.35 
  -4  -1   0  268.93    5.36 
  -4  -1   0  260.80    5.33 
  -4  -1   0  257.68    5.34 
   4  -1   0  259.89    5.37 
   4  -1   0  266.22    5.44 
  -4  -1   0  267.16    5.35 
  -4  -1   0  271.61    5.45 
  -4   1   0  271.99    5.51 
   4   1   0  266.28    5.41 
  -4   1   0  254.28    5.41 
  -4   1   0  269.89    5.47 
  -4   1   0  255.41    5.41 
  -4   1   0  264.41    5.44 
  -4   1   0  262.57    5.43 
  -5  -1   0  164.62    3.35 
  -5  -1   0  165.38    3.55 
  -5  -1   0  164.10    3.33 
  -5  -1   0  161.92    3.46 
  -5  -1   0  162.06    3.33 
   5  -1   0  164.47    3.30 
  -5  -1   0  161.88    3.32 
   5  -1   0  163.80    3.44 
  -5  -1   0  160.38    3.45 
  -5  -1   0  161.72    3.34 
  -5  -1   0  161.20    3.33 
  -5   1   0  165.66    3.43 
  -5   1   0  162.82    3.42 
   5   1   0  168.73    3.43 
  -5   1   0  161.59    3.51 
  -5   1   0  163.74    3.46 
  -5   1   0  163.66    3.54 
  -5   1   0  160.58    3.44 
  -6  -1   0    4.23    0.29 
  -6  -1   0    4.35    0.17 
  -6  -1   0    4.55    0.26 
  -6  -1   0    4.89    0.18 
  -6  -1   0    4.54    0.17 
  -6  -1   0    4.16    0.19 
   6  -1   0    4.52    0.23 
  -6  -1   0    4.24    0.25 
  -6  -1   0    4.44    0.17 
   6  -1   0    4.61    0.14 
  -6  -1   0    4.55    0.17 
  -6   1   0    4.40    0.28 
  -6   1   0    4.41    0.28 
  -6   1   0    4.39    0.23 
  -6   1   0    4.44    0.25 
  -6   1   0    4.50    0.24 
  -6   1   0    4.65    0.23 
   6   1   0    4.48    0.24 
  -7  -1   0  139.91    2.93 
  -7  -1   0  140.78    2.97 
  -7  -1   0  141.91    3.13 
  -7  -1   0  140.43    2.93 
   7  -1   0  145.91    2.86 
  -7  -1   0  140.46    2.93 
  -7  -1   0  146.66    3.26 
  -7  -1   0  142.53    3.11 
  -7  -1   0  140.97    2.94 
  -7   1   0  143.12    3.21 
  -7   1   0  143.07    3.22 
  -7   1   0  139.99    3.04 
   7   1   0  142.98    3.08 
  -7   1   0  142.44    3.11 
  -7   1   0  142.20    3.07 
  -7   1   0  139.38    3.05 
  -8  -1   0   88.25    1.87 
  -8  -1   0   86.98    2.08 
  -8  -1   0   87.61    1.83 
  -8  -1   0   87.25    2.19 
  -8  -1   0   88.58    1.85 
  -8  -1   0   86.28    1.85 
  -8  -1   0   86.16    1.88 
  -8  -1   0   86.82    2.05 
  -8   1   0   86.96    1.96 
  -8   1   0   86.24    1.98 
  -8   1   0   84.55    2.15 
   8   1   0   88.03    2.02 
  -8   1   0   84.80    1.98 
  -8   1   0   87.04    2.16 
  -8   1   0   83.69    2.03 
  -9  -1   0    1.36    0.12 
  -9  -1   0    1.66    0.12 
  -9  -1   0    1.45    0.14 
  -9  -1   0    1.43    0.10 
  -9  -1   0    1.44    0.27 
  -9  -1   0    1.62    0.22 
  -9  -1   0    1.53    0.13 
  -9  -1   0    1.39    0.22 
  -9   1   0    1.19    0.19 
  -9   1   0    1.42    0.18 
  -9   1   0    1.48    0.18 
  -9   1   0    1.47    0.25 
  -9   1   0    1.30    0.17 
   9   1   0    1.15    0.19 
  -9   1   0    1.57    0.25 
 -10  -1   0    0.08    0.09 
 -10  -1   0    0.15    0.07 
 -10  -1   0    0.17    0.13 
 -10  -1   0   -0.02    0.10 
 -10  -1   0    0.17    0.07 
 -10  -1   0    0.47    0.07 
 -10  -1   0    0.13    0.06 
 -10  -1   0    0.06    0.05 
 -10   1   0    0.11    0.08 
 -10   1   0    0.06    0.08 
 -10   1   0    0.09    0.09 
  10   1   0    0.22    0.11 
 -10   1   0    0.07    0.08 
 -10   1   0    0.07    0.12 
 -10   1   0    0.10    0.12 
 -11  -1   0    4.92    0.45 
 -11  -1   0    3.36    0.18 
 -11  -1   0    3.55    0.21 
 -11  -1   0    3.74    0.20 
 -11  -1   0    3.56    0.19 
 -11  -1   0    3.76    0.35 
 -11   1   0    3.86    0.31 
 -11   1   0    2.95    0.38 
 -11   1   0    3.64    0.26 
 -11   1   0    3.77    0.27 
  11   1   0    3.66    0.34 
 -11   1   0    3.99    0.43 
 -11   1   0    3.50    0.24 
 -12  -1   0    0.75    0.19 
 -12  -1   0    0.98    0.14 
 -12  -1   0    0.47    0.21 
  12  -1   0    0.80    0.13 
 -12  -1   0    0.71    0.10 
 -12  -1   0    0.75    0.22 
 -12  -1   0    0.72    0.11 
 -12   1   0    0.95    0.16 
 -12   1   0    0.60    0.21 
  12   1   0    1.08    0.21 
 -12   1   0    0.70    0.15 
 -12   1   0    0.79    0.24 
 -12   1   0    0.58    0.17 
 -12   1   0    1.01    0.18 
 -13  -1   0   54.54    1.26 
  13  -1   0   53.31    1.28 
 -13  -1   0   52.65    1.76 
 -13  -1   0   54.06    1.35 
 -13  -1   0   55.81    1.24 
 -13  -1   0   54.26    1.55 
 -13  -1   0   55.77    1.64 
 -13   1   0   54.90    1.55 
 -13   1   0   54.44    1.46 
  13   1   0   55.74    1.55 
 -13   1   0   50.88    1.73 
 -13   1   0   55.39    1.40 
 -13   1   0   51.97    1.69 
 -13   1   0   55.96    1.44 
 -14  -1   0   43.57    1.58 
 -14  -1   0   43.55    1.05 
 -14  -1   0   45.53    1.46 
 -14  -1   0   43.65    1.15 
 -14  -1   0   42.86    1.34 
 -14  -1   0   44.15    1.02 
 -14   1   0   44.07    1.26 
 -14   1   0   42.18    1.49 
  14   1   0   42.42    1.20 
 -14   1   0   43.02    1.22 
  14   1   0   43.57    1.35 
 -14   1   0   44.48    1.58 
 -14   1   0   43.73    1.18 
 -14   1   0   44.46    1.36 
 -15  -1   0   30.60    1.32 
 -15  -1   0   30.43    0.75 
  15  -1   0   30.37    1.16 
 -15  -1   0   29.23    0.77 
 -15  -1   0   31.08    1.18 
 -15  -1   0   31.48    1.09 
 -15  -1   0   30.82    0.91 
 -15   1   0   31.11    1.10 
 -15   1   0   31.21    0.93 
 -15   1   0   32.19    1.26 
 -15   1   0   30.36    1.29 
 -15   1   0   31.72    1.02 
  15   1   0   30.88    1.10 
 -15   1   0   30.65    0.97 
 -16  -1   0   54.64    1.20 
 -16  -1   0   52.35    1.73 
  16  -1   0   53.41    1.71 
 -16  -1   0   55.20    1.64 
 -16  -1   0   53.52    1.22 
 -16  -1   0   53.56    1.41 
 -16  -1   0   53.66    1.92 
 -16   1   0   54.79    1.64 
 -16   1   0   53.00    1.41 
  16   1   0   54.37    1.64 
 -16   1   0   53.65    1.46 
 -16   1   0   54.86    1.54 
 -16   1   0   50.78    1.78 
 -16   1   0   56.01    1.92 
 -17  -1   0   31.79    0.97 
  17  -1   0   31.78    1.24 
 -17  -1   0   29.74    1.39 
 -17  -1   0   30.58    1.14 
 -17  -1   0   29.95    1.24 
  17   1   0   34.58    1.21 
 -17   1   0   31.50    0.95 
 -17   1   0   29.09    0.97 
 -17   1   0   30.98    1.07 
 -17   1   0   30.34    1.15 
 -17   1   0   30.17    1.39 
 -17   1   0   32.18    1.33 
  18  -1   0   25.94    1.13 
 -18  -1   0   23.91    1.27 
 -18  -1   0   25.62    0.86 
 -18  -1   0   25.12    1.14 
 -18   1   0   26.73    0.98 
  18   1   0   25.31    1.06 
 -18   1   0   26.59    1.24 
 -18   1   0   27.77    1.33 
 -18   1   0   25.52    0.87 
 -18   1   0   25.89    0.83 
 -19  -1   0   15.45    0.91 
 -19  -1   0   18.72    1.13 
  19  -1   0   18.42    0.94 
 -19   1   0   17.05    1.07 
  19   1   0   18.23    0.89 
 -19   1   0   17.14    0.78 
 -19   1   0   17.10    0.68 
 -19   1   0   16.25    0.98 
  20  -1   0   22.24    1.09 
 -20  -1   0   21.80    1.28 
 -20  -1   0   22.92    1.14 
 -20   1   0   22.38    0.79 
 -20   1   0   22.93    1.19 
 -20   1   0   22.61    0.93 
 -20   1   0   22.43    1.29 
  21  -1   0   26.96    1.25 
 -21  -1   0   25.04    1.25 
 -21  -1   0   24.66    1.42 
 -21   1   0   27.39    0.88 
 -21   1   0   28.19    1.38 
 -21   1   0   32.02    1.57 
 -22  -1   0   24.89    1.26 
 -22  -1   0   26.03    1.47 
 -22   1   0   24.28    0.78 
 -22   1   0   26.52    1.35 
 -22   1   0   26.51    1.49 
 -23  -1   0   16.50    1.05 
 -23  -1   0   14.60    1.12 
 -23   1   0   14.21    0.47 
 -23   1   0   11.98    1.23 
 -23   1   0   13.85    1.00 
 -24  -1   0   20.06    1.37 
 -24  -1   0   22.49    1.26 
 -24   1   0   21.13    1.42 
 -24   1   0   20.00    1.26 
 -25  -1   0    4.19    0.77 
 -25  -1   0    2.87    0.59 
 -25   1   0    4.58    0.73 
 -25   1   0    4.08    0.77 
 -26  -1   0    9.48    1.01 
 -26  -1   0    8.00    1.06 
 -26   1   0    7.92    0.96 
 -26   1   0   11.63    1.30 
 -27  -1   0    2.57    0.71 
 -27  -1   0    2.50    0.60 
 -27   1   0    1.66    0.57 
 -27   1   0    3.31    0.70 
   0  -2   0  111.00    2.35 
   0  -2   0  110.00    2.37 
   0  -2   0  114.23    2.39 
   0  -2   0  110.00    2.37 
   0  -2   0  108.08    2.33 
   0   2   0  111.24    2.34 
   0   2   0  106.88    2.37 
   0   2   0  108.90    2.37 
  -1  -2   0  387.13    7.89 
   1  -2   0  377.61    7.99 
  -1  -2   0  387.13    8.10 
  -1  -2   0  383.99    8.09 
   1  -2   0  377.74    7.91 
   1  -2   0  384.79    7.94 
  -1  -2   0  387.74    7.86 
   1  -2   0  399.19    7.92 
  -1  -2   0  380.94    7.88 
  -1  -2   0  391.59    8.04 
   1   2   0  382.45    7.94 
  -1   2   0  392.17    8.09 
  -1   2   0  392.87    8.09 
   1   2   0  396.23    8.09 
  -1   2   0  382.43    7.88 
  -1   2   0  384.97    7.91 
   1   2   0  409.31    8.03 
  -2  -2   0    2.44    0.16 
  -2  -2   0    2.71    0.17 
  -2  -2   0    2.77    0.17 
  -2  -2   0    2.58    0.17 
  -2  -2   0    2.34    0.16 
  -2  -2   0    2.72    0.18 
   2  -2   0    2.18    0.18 
   2  -2   0    2.99    0.20 
  -2  -2   0    2.39    0.15 
  -2  -2   0    2.58    0.16 
   2   2   0    2.74    0.16 
  -2   2   0    2.39    0.18 
  -2   2   0    2.70    0.19 
  -2   2   0    2.49    0.19 
   2   2   0    2.33    0.15 
  -2   2   0    2.65    0.18 
  -3  -2   0   40.67    0.99 
  -3  -2   0   42.34    1.01 
  -3  -2   0   43.76    1.06 
  -3  -2   0   42.23    1.00 
   3  -2   0   41.53    1.07 
   3  -2   0   40.71    1.06 
  -3  -2   0   41.40    0.98 
  -3  -2   0   43.15    1.02 
  -3  -2   0   42.12    0.99 
  -3  -2   0   41.17    1.05 
   3  -2   0   42.10    0.99 
  -3   2   0   40.65    1.06 
  -3   2   0   42.53    1.07 
  -3   2   0   42.55    1.07 
   3   2   0   42.71    1.00 
   3   2   0   41.98    0.97 
  -3   2   0   42.96    1.06 
  -4  -2   0  100.34    2.16 
  -4  -2   0  100.00    2.24 
  -4  -2   0  100.55    2.16 
  -4  -2   0   99.34    2.15 
  -4  -2   0  101.52    2.18 
   4  -2   0  104.19    2.27 
  -4  -2   0  100.51    2.20 
  -4  -2   0  102.54    2.28 
   4  -2   0  103.51    2.28 
  -4  -2   0   97.53    2.16 
  -4  -2   0   99.02    2.14 
   4  -2   0  101.85    2.15 
  -4  -2   0   99.66    2.15 
  -4   2   0  100.11    2.25 
   4   2   0   98.99    2.11 
  -4   2   0  102.60    2.27 
   4   2   0  104.37    2.19 
  -4   2   0   96.35    2.28 
  -5  -2   0    3.30    0.17 
  -5  -2   0    3.46    0.23 
  -5  -2   0    3.38    0.17 
   5  -2   0    3.57    0.24 
  -5  -2   0    3.50    0.18 
   5  -2   0    3.19    0.17 
  -5  -2   0    3.24    0.19 
  -5  -2   0    3.50    0.18 
  -5  -2   0    3.44    0.19 
  -5  -2   0    3.28    0.18 
  -5  -2   0    3.58    0.25 
  -5   2   0    3.53    0.24 
   5   2   0    3.53    0.14 
   5   2   0    3.44    0.20 
  -5   2   0    3.45    0.23 
  -5   2   0    3.41    0.22 
  -5   2   0    2.94    0.24 
  -6  -2   0   56.04    1.27 
   6  -2   0   55.83    1.25 
  -6  -2   0   55.80    1.30 
   6  -2   0   55.30    1.41 
  -6  -2   0   56.81    1.25 
  -6  -2   0   56.00    1.27 
  -6  -2   0   55.26    1.26 
  -6  -2   0   55.13    1.28 
  -6  -2   0   55.34    1.27 
  -6  -2   0   57.17    1.48 
  -6  -2   0   55.96    1.34 
  -6  -2   0   56.27    1.40 
   6   2   0   58.29    1.35 
  -6   2   0   55.12    1.41 
  -6   2   0   53.93    1.40 
  -6   2   0   55.03    1.38 
  -6   2   0   55.74    1.47 
  -6   2   0   55.79    1.41 
  -6   2   0   54.54    1.39 
   7  -2   0   23.68    0.61 
   7  -2   0   25.35    0.78 
  -7  -2   0   24.75    0.65 
  -7  -2   0   23.35    0.76 
  -7  -2   0   23.73    0.84 
  -7  -2   0   25.05    0.74 
  -7  -2   0   25.57    0.67 
  -7  -2   0   24.06    0.64 
  -7  -2   0   24.91    0.66 
  -7  -2   0   24.20    0.63 
  -7  -2   0   23.70    0.61 
  -7   2   0   24.61    0.78 
  -7   2   0   24.67    0.81 
   7   2   0   25.43    0.73 
  -7   2   0   24.34    0.76 
  -7   2   0   24.40    0.77 
  -7   2   0   22.97    0.83 
  -7   2   0   23.95    0.74 
  -8  -2   0    0.98    0.12 
  -8  -2   0    0.84    0.12 
   8  -2   0    0.65    0.14 
  -8  -2   0    0.48    0.10 
   8  -2   0    0.72    0.09 
  -8  -2   0    0.84    0.10 
  -8  -2   0    0.71    0.18 
  -8  -2   0    0.83    0.16 
  -8  -2   0    0.62    0.09 
  -8  -2   0    0.67    0.14 
  -8  -2   0    0.79    0.11 
  -8   2   0    0.75    0.14 
  -8   2   0    0.76    0.15 
  -8   2   0    0.55    0.14 
  -8   2   0    0.49    0.15 
  -8   2   0    0.48    0.16 
   8   2   0    0.85    0.15 
  -8   2   0    0.67    0.14 
  -9  -2   0   27.15    0.72 
  -9  -2   0   26.50    0.72 
  -9  -2   0   27.40    0.74 
  -9  -2   0   26.54    0.67 
  -9  -2   0   25.93    0.86 
  -9  -2   0   26.97    0.71 
   9  -2   0   26.63    0.85 
  -9  -2   0   26.78    0.68 
   9  -2   0   27.80    0.66 
  -9  -2   0   26.20    0.85 
  -9  -2   0   27.86    1.00 
  -9   2   0   28.32    0.85 
  -9   2   0   25.48    0.93 
  -9   2   0   26.87    0.85 
  -9   2   0   26.04    0.96 
  -9   2   0   28.17    0.87 
   9   2   0   26.95    0.83 
  -9   2   0   28.12    0.89 
 -10  -2   0    2.55    0.29 
 -10  -2   0    3.06    0.32 
 -10  -2   0    2.96    0.20 
 -10  -2   0    2.84    0.19 
  10  -2   0    2.60    0.14 
 -10  -2   0    2.97    0.37 
 -10  -2   0    2.77    0.15 
 -10  -2   0    2.79    0.19 
 -10  -2   0    2.45    0.18 
 -10  -2   0    3.07    0.16 
 -10   2   0    2.42    0.33 
 -10   2   0    2.59    0.30 
 -10   2   0    2.27    0.27 
 -10   2   0    2.93    0.30 
 -10   2   0    2.95    0.25 
  10   2   0    2.87    0.29 
 -10   2   0    1.97    0.31 
 -11  -2   0   37.28    0.87 
 -11  -2   0   36.59    0.88 
 -11  -2   0   37.77    0.94 
 -11  -2   0   37.28    0.95 
 -11  -2   0   35.55    1.29 
 -11  -2   0   39.17    0.97 
 -11  -2   0   35.02    1.14 
 -11  -2   0   39.19    1.17 
  11  -2   0   38.25    0.83 
 -11   2   0   35.83    1.11 
 -11   2   0   36.61    1.15 
 -11   2   0   38.12    1.09 
 -11   2   0   37.01    1.28 
 -11   2   0   37.45    1.27 
 -11   2   0   36.84    1.12 
  11   2   0   39.47    1.12 
 -12  -2   0    4.25    0.24 
 -12  -2   0    4.52    0.43 
 -12  -2   0    4.56    0.51 
 -12  -2   0    3.85    0.18 
 -12  -2   0    4.27    0.41 
  12  -2   0    4.23    0.20 
 -12  -2   0    4.38    0.25 
 -12  -2   0    4.19    0.18 
 -12  -2   0    3.75    0.22 
 -12   2   0    3.93    0.45 
 -12   2   0    3.93    0.32 
  12   2   0    3.51    0.35 
 -12   2   0    4.34    0.33 
 -12   2   0    4.30    0.31 
 -12   2   0    4.77    0.52 
 -12   2   0    4.58    0.36 
 -13  -2   0   12.11    0.45 
 -13  -2   0   12.98    0.62 
 -13  -2   0   12.39    0.40 
 -13  -2   0   11.59    0.33 
 -13  -2   0   11.83    0.33 
 -13  -2   0   11.70    0.61 
 -13  -2   0   11.68    0.72 
 -13  -2   0   11.15    0.42 
 -13   2   0   11.82    0.53 
 -13   2   0   12.81    0.73 
 -13   2   0   11.04    0.59 
 -13   2   0   11.95    0.57 
 -13   2   0   13.04    0.72 
  13   2   0   11.50    0.57 
 -13   2   0   11.48    0.57 
 -14  -2   0    0.02    0.14 
 -14  -2   0    0.16    0.10 
 -14  -2   0   -0.01    0.13 
 -14  -2   0    0.16    0.19 
 -14   2   0    0.10    0.12 
 -14   2   0    0.17    0.12 
 -14   2   0    0.06    0.16 
  14   2   0    0.03    0.14 
 -14   2   0    0.06    0.12 
 -14   2   0   -0.05    0.14 
 -14   2   0    0.18    0.15 
 -15  -2   0   52.87    1.59 
 -15  -2   0   51.79    1.33 
 -15  -2   0   52.53    1.64 
 -15  -2   0   52.27    1.85 
 -15   2   0   55.31    1.85 
 -15   2   0   52.02    1.46 
 -15   2   0   52.51    1.55 
 -15   2   0   51.50    1.51 
  15   2   0   54.01    1.56 
 -15   2   0   50.54    1.76 
 -15   2   0   52.50    1.60 
 -16  -2   0   20.16    0.68 
 -16  -2   0   21.91    1.13 
 -16  -2   0   20.11    0.88 
 -16  -2   0   19.34    0.91 
 -16   2   0   19.88    1.05 
 -16   2   0   19.84    0.81 
 -16   2   0   21.96    0.92 
 -16   2   0   19.77    1.03 
 -16   2   0   19.98    0.85 
  16   2   0   21.70    0.88 
 -17  -2   0    1.07    0.28 
 -17  -2   0    1.85    0.24 
 -17  -2   0    1.95    0.37 
 -17  -2   0    1.58    0.41 
 -17   2   0    1.99    0.42 
 -17   2   0    2.12    0.36 
  17   2   0    1.92    0.33 
 -17   2   0    1.57    0.38 
 -17   2   0    2.18    0.32 
 -17   2   0    1.79    0.32 
 -18  -2   0    2.32    0.42 
 -18  -2   0    2.45    0.50 
 -18   2   0    2.16    0.35 
  18   2   0    1.64    0.33 
 -18   2   0    2.17    0.46 
 -18   2   0    1.87    0.30 
 -18   2   0    2.12    0.45 
  19  -2   0   -0.03    0.20 
 -19  -2   0   -0.05    0.21 
 -19  -2   0    0.26    0.24 
 -19   2   0   -0.09    0.15 
 -19   2   0    0.10    0.23 
 -19   2   0    0.70    0.32 
 -19   2   0    0.29    0.16 
 -20  -2   0    1.95    0.53 
  20  -2   0    2.71    0.49 
 -20  -2   0    2.90    0.48 
 -20   2   0    2.25    0.50 
 -20   2   0    3.53    0.61 
 -20   2   0    3.02    0.43 
 -20   2   0    2.43    0.34 
 -21  -2   0    0.02    0.23 
 -21  -2   0    0.32    0.31 
  21  -2   0   -0.05    0.21 
 -21   2   0   -0.09    0.28 
 -21   2   0    0.09    0.20 
 -21   2   0    0.27    0.17 
 -21   2   0    0.43    0.35 
  22  -2   0    0.34    0.29 
 -22  -2   0   -0.25    0.22 
 -22  -2   0   -0.27    0.21 
 -22   2   0    0.03    0.28 
 -22   2   0    0.40    0.35 
 -22   2   0    0.38    0.19 
 -23  -2   0   -0.23    0.23 
 -23  -2   0   -0.24    0.22 
 -23   2   0   -0.37    0.22 
 -23   2   0   -0.10    0.24 
 -23   2   0    0.20    0.16 
 -24  -2   0    0.67    0.38 
 -24  -2   0   -0.02    0.29 
 -24   2   0    0.51    0.38 
 -24   2   0    1.30    0.49 
 -24   2   0    1.13    0.22 
 -25  -2   0    0.11    0.31 
 -25  -2   0   -0.04    0.30 
 -25   2   0   -0.34    0.32 
 -25   2   0    0.37    0.15 
 -25   2   0    0.50    0.35 
 -26  -2   0    0.39    0.39 
 -26  -2   0    0.30    0.37 
 -26   2   0    0.41    0.35 
 -26   2   0    0.78    0.47 
 -27  -2   0   -0.20    0.29 
 -27  -2   0   -0.03    0.31 
 -27   2   0   -0.18    0.30 
 -27   2   0    0.41    0.39 
   0  -3   0    0.13    0.07 
   0  -3   0    0.02    0.05 
   0  -3   0   -0.01    0.05 
   0  -3   0    0.09    0.07 
   0  -3   0   -0.02    0.05 
   0   3   0    0.00    0.05 
   0   3   0    0.02    0.05 
   0   3   0   -0.01    0.06 
   0   3   0    0.02    0.06 
  -1  -3   0  128.05    2.83 
  -1  -3   0  133.09    2.85 
   1  -3   0  131.94    2.81 
  -1  -3   0  128.43    2.83 
  -1  -3   0  129.69    2.79 
   1  -3   0  124.23    2.86 
  -1  -3   0  128.38    2.78 
   1  -3   0  132.92    2.77 
  -1  -3   0  131.80    2.82 
   1  -3   0  134.35    2.81 
   1  -3   0  131.47    2.86 
   1   3   0  127.51    2.77 
   1   3   0  129.10    2.83 
  -1   3   0  128.92    2.82 
   1   3   0  130.16    2.71 
  -1   3   0  126.49    2.85 
  -1   3   0  122.13    2.84 
  -1   3   0  129.21    2.77 
   1   3   0  127.38    2.81 
  -2  -3   0   73.70    1.69 
  -2  -3   0   71.62    1.70 
   2  -3   0   74.07    1.63 
   2  -3   0   75.46    1.75 
   2  -3   0   70.40    1.75 
   2  -3   0   72.63    1.67 
  -2  -3   0   71.22    1.69 
  -2  -3   0   73.24    1.72 
  -2  -3   0   74.65    1.70 
   2  -3   0   72.94    1.68 
  -2  -3   0   72.55    1.67 
  -2  -3   0   75.12    1.66 
   2   3   0   72.77    1.67 
   2   3   0   70.16    1.68 
  -2   3   0   73.00    1.74 
  -2   3   0   70.72    1.73 
   2   3   0   72.27    1.65 
  -2   3   0   72.32    1.68 
  -2   3   0   70.99    1.71 
  -3  -3   0    2.42    0.18 
  -3  -3   0    2.27    0.18 
   3  -3   0    2.25    0.15 
  -3  -3   0    2.39    0.18 
  -3  -3   0    2.66    0.18 
   3  -3   0    2.78    0.19 
  -3  -3   0    2.26    0.18 
   3  -3   0    1.81    0.21 
  -3  -3   0    2.52    0.20 
  -3  -3   0    2.33    0.18 
  -3  -3   0    2.22    0.17 
   3  -3   0    1.98    0.22 
  -3   3   0    2.57    0.20 
  -3   3   0    2.01    0.21 
  -3   3   0    2.59    0.25 
   3   3   0    2.99    0.19 
   3   3   0    2.27    0.17 
  -3   3   0    2.32    0.24 
  -4  -3   0   51.01    1.22 
  -4  -3   0   50.01    1.29 
  -4  -3   0   50.52    1.24 
   4  -3   0   51.12    1.33 
   4  -3   0   51.74    1.35 
  -4  -3   0   51.33    1.23 
  -4  -3   0   48.24    1.23 
  -4  -3   0   52.19    1.29 
   4  -3   0   50.13    1.22 
  -4  -3   0   49.17    1.24 
   4  -3   0   50.55    1.17 
  -4  -3   0   47.78    1.25 
  -4   3   0   48.47    1.31 
  -4   3   0   49.02    1.32 
  -4   3   0   49.46    1.32 
   4   3   0   51.32    1.22 
   4   3   0   49.96    1.19 
  -4   3   0   52.82    1.33 
  -5  -3   0    5.95    0.30 
  -5  -3   0    5.93    0.33 
   5  -3   0    6.69    0.29 
  -5  -3   0    5.94    0.29 
   5  -3   0    6.32    0.36 
   5  -3   0    6.70    0.26 
  -5  -3   0    6.26    0.35 
  -5  -3   0    6.57    0.29 
   5  -3   0    6.40    0.37 
  -5  -3   0    6.17    0.29 
  -5  -3   0    6.73    0.29 
  -5  -3   0    6.41    0.32 
  -5   3   0    5.73    0.35 
  -5   3   0    5.99    0.34 
  -5   3   0    6.59    0.36 
   5   3   0    6.89    0.27 
   5   3   0    5.79    0.28 
  -6  -3   0    1.16    0.19 
  -6  -3   0    1.23    0.15 
   6  -3   0    1.44    0.16 
   6  -3   0    1.56    0.15 
  -6  -3   0    1.41    0.16 
   6  -3   0    1.39    0.22 
   6  -3   0    1.15    0.19 
  -6  -3   0    1.09    0.18 
  -6  -3   0    1.26    0.15 
  -6  -3   0    1.10    0.16 
  -6  -3   0    1.41    0.16 
  -6   3   0    0.92    0.17 
   6   3   0    1.50    0.18 
  -6   3   0    1.80    0.26 
   6   3   0    1.38    0.13 
  -6   3   0    1.20    0.20 
  -7  -3   0    0.55    0.13 
  -7  -3   0    0.83    0.12 
   7  -3   0    0.60    0.10 
  -7  -3   0    0.61    0.12 
  -7  -3   0    0.88    0.20 
   7  -3   0    0.62    0.11 
  -7  -3   0    0.35    0.10 
  -7  -3   0    0.70    0.13 
  -7  -3   0    0.77    0.12 
  -7  -3   0    0.74    0.13 
   7  -3   0    0.64    0.16 
   7  -3   0    0.47    0.14 
  -7   3   0    0.87    0.18 
  -7   3   0    0.61    0.15 
   7   3   0    0.64    0.13 
   7   3   0    0.66    0.08 
  -7   3   0    0.44    0.15 
  -7   3   0    0.56    0.15 
  -7   3   0    0.64    0.16 
  -8  -3   0    0.81    0.13 
  -8  -3   0    0.67    0.16 
  -8  -3   0    0.88    0.14 
  -8  -3   0    0.85    0.13 
  -8  -3   0    0.93    0.14 
   8  -3   0    0.86    0.19 
  -8  -3   0    0.75    0.11 
  -8  -3   0    0.69    0.13 
  -8  -3   0    0.74    0.12 
   8  -3   0    0.85    0.13 
  -8  -3   0    0.99    0.22 
  -8  -3   0    0.51    0.12 
   8  -3   0    0.87    0.12 
  -8   3   0    0.70    0.17 
  -8   3   0    0.63    0.16 
  -8   3   0    0.49    0.14 
  -8   3   0    0.83    0.21 
  -8   3   0    0.70    0.17 
  -8   3   0    0.66    0.17 
   8   3   0    0.62    0.14 
  -9  -3   0    8.61    0.37 
  -9  -3   0    9.44    0.48 
  -9  -3   0    9.40    0.34 
  -9  -3   0    9.70    0.43 
  -9  -3   0    8.71    0.39 
  -9  -3   0   10.34    0.39 
   9  -3   0    9.53    0.50 
  -9  -3   0    9.61    0.39 
   9  -3   0    9.69    0.33 
  -9  -3   0    9.67    0.37 
   9  -3   0    9.91    0.36 
  -9  -3   0    9.30    0.54 
  -9   3   0    9.80    0.50 
   9   3   0    9.44    0.44 
  -9   3   0    9.26    0.47 
  -9   3   0    9.41    0.51 
  -9   3   0    9.39    0.50 
  -9   3   0   10.08    0.56 
  -9   3   0    9.92    0.50 
 -10  -3   0   19.14    0.69 
 -10  -3   0   18.83    0.60 
 -10  -3   0   20.66    0.87 
  10  -3   0   19.03    0.76 
 -10  -3   0   20.60    0.77 
 -10  -3   0   19.42    0.62 
 -10  -3   0   19.58    0.61 
 -10  -3   0   19.03    0.54 
  10  -3   0   18.96    0.54 
  10  -3   0   18.86    0.57 
 -10  -3   0   18.71    0.57 
 -10  -3   0   19.86    0.64 
 -10   3   0   19.39    0.85 
 -10   3   0   18.84    0.73 
 -10   3   0   19.02    0.75 
 -10   3   0   18.84    0.76 
  10   3   0   18.86    0.69 
 -10   3   0   19.05    0.77 
 -10   3   0   20.95    0.83 
 -11  -3   0    0.96    0.16 
 -11  -3   0    0.85    0.16 
 -11  -3   0    0.94    0.12 
 -11  -3   0    0.76    0.11 
  11  -3   0    0.84    0.12 
 -11  -3   0    1.07    0.16 
  11  -3   0    0.92    0.13 
 -11  -3   0    0.62    0.20 
  11  -3   0    0.80    0.19 
 -11  -3   0    1.00    0.22 
 -11  -3   0    0.66    0.14 
 -11  -3   0    0.60    0.17 
 -11   3   0    0.67    0.19 
 -11   3   0    0.78    0.20 
 -11   3   0    0.59    0.18 
 -11   3   0    0.72    0.22 
 -11   3   0    0.88    0.19 
  11   3   0    0.72    0.17 
 -11   3   0    1.15    0.27 
 -12  -3   0   92.81    2.61 
 -12  -3   0   96.76    2.20 
 -12  -3   0   96.74    2.07 
  12  -3   0   96.34    2.09 
  12  -3   0   95.32    2.07 
 -12  -3   0   95.05    2.42 
 -12  -3   0   96.11    2.38 
 -12  -3   0   96.78    2.05 
  12  -3   0   94.46    2.39 
 -12  -3   0   96.51    2.18 
 -12  -3   0   93.62    2.20 
 -12   3   0   98.91    2.45 
 -12   3   0   94.64    2.44 
 -12   3   0   97.94    2.46 
 -12   3   0   97.75    2.58 
 -12   3   0   94.87    2.62 
  12   3   0   94.80    2.33 
 -12   3   0   91.03    2.35 
 -13  -3   0    7.97    0.60 
 -13  -3   0    9.33    0.53 
 -13  -3   0    8.79    0.39 
 -13  -3   0    8.96    0.40 
 -13  -3   0    8.89    0.28 
 -13  -3   0    8.82    0.40 
 -13  -3   0    8.63    0.29 
 -13  -3   0    9.52    0.55 
 -13   3   0    9.01    0.54 
  13   3   0    8.94    0.50 
 -13   3   0    9.79    0.65 
 -13   3   0    7.44    0.46 
 -13   3   0    8.13    0.58 
 -13   3   0    8.27    0.52 
 -13   3   0    8.45    0.53 
 -14  -3   0    0.45    0.19 
 -14  -3   0    0.07    0.14 
 -14  -3   0    0.18    0.11 
 -14  -3   0    0.09    0.19 
 -14   3   0    0.11    0.15 
 -14   3   0    0.28    0.18 
 -14   3   0    0.56    0.23 
  14   3   0    0.40    0.18 
 -14   3   0    0.43    0.22 
 -14   3   0    0.39    0.19 
 -15  -3   0   27.33    1.05 
 -15  -3   0   27.02    1.25 
 -15  -3   0   29.33    0.84 
 -15  -3   0   25.12    1.02 
 -15   3   0   28.64    1.09 
 -15   3   0   28.18    1.05 
 -15   3   0   26.25    1.19 
 -15   3   0   25.84    1.20 
  15   3   0   28.21    1.01 
 -15   3   0   27.83    1.06 
 -16  -3   0   18.02    1.02 
 -16  -3   0   19.12    0.87 
 -16  -3   0   18.41    0.85 
 -16  -3   0   18.37    0.64 
 -16   3   0   17.62    0.99 
 -16   3   0   19.02    0.88 
 -16   3   0   18.14    1.00 
 -16   3   0   18.36    0.85 
  16   3   0   18.88    0.81 
 -16   3   0   17.98    0.83 
 -17  -3   0    3.99    0.47 
 -17  -3   0    2.91    0.42 
 -17  -3   0    3.43    0.56 
 -17   3   0    4.46    0.51 
 -17   3   0    3.73    0.43 
 -17   3   0    4.34    0.62 
  17   3   0    4.03    0.45 
 -17   3   0    4.15    0.60 
 -17   3   0    4.41    0.49 
 -18  -3   0   21.97    1.22 
 -18  -3   0   22.69    1.02 
 -18   3   0   21.59    0.99 
 -18   3   0   23.31    1.22 
 -18   3   0   24.40    1.23 
 -18   3   0   22.97    0.97 
 -19  -3   0   17.36    0.90 
 -19  -3   0   15.99    1.09 
 -19   3   0   16.64    0.82 
 -19   3   0   17.81    1.09 
 -19   3   0   16.72    1.06 
 -19   3   0   18.26    0.91 
 -20  -3   0   10.42    1.05 
 -20  -3   0   12.54    0.78 
 -20   3   0   10.64    0.89 
 -20   3   0   11.79    0.74 
 -20   3   0   11.89    0.69 
 -20   3   0   13.02    0.95 
 -21  -3   0    1.13    0.34 
  21  -3   0    0.72    0.32 
 -21  -3   0    0.52    0.33 
 -21   3   0    1.05    0.27 
 -21   3   0    0.21    0.25 
 -21   3   0    0.41    0.34 
 -21   3   0    0.19    0.27 
  22  -3   0   16.00    1.03 
 -22  -3   0   15.74    0.95 
 -22  -3   0   16.45    1.18 
 -22   3   0   18.89    1.20 
 -22   3   0   15.87    0.80 
 -22   3   0   17.15    1.18 
 -22   3   0   15.90    0.91 
 -23  -3   0    9.03    0.89 
  23  -3   0    6.55    0.80 
 -23  -3   0    5.70    0.88 
 -23   3   0    7.49    0.55 
 -23   3   0    6.32    0.90 
 -23   3   0    8.96    1.01 
 -24  -3   0    3.38    0.56 
 -24  -3   0    3.68    0.72 
 -24   3   0    2.33    0.59 
 -24   3   0    2.59    0.38 
 -24   3   0    3.24    0.69 
 -25  -3   0    6.58    0.96 
 -25  -3   0    7.57    0.84 
 -25   3   0    6.19    0.96 
 -25   3   0    5.18    0.85 
 -25   3   0    6.21    0.47 
 -26  -3   0   11.49    1.31 
 -26  -3   0   12.88    0.95 
 -26   3   0   13.88    1.35 
 -26   3   0   12.28    0.62 
 -26   3   0   12.33    1.36 
 -27  -3   0    0.31    0.43 
 -27  -3   0    1.02    0.40 
 -27   3   0    1.12    0.53 
 -27   3   0    0.96    0.20 
 -27   3   0    0.69    0.49 
   0  -4   0  192.46    4.33 
   0  -4   0  198.55    4.26 
   0  -4   0  204.01    4.25 
   0  -4   0  205.37    4.30 
   0  -4   0  192.76    4.33 
   0   4   0  199.44    4.33 
   0   4   0  199.74    4.27 
   0   4   0  202.53    4.19 
   0   4   0  199.01    4.32 
  -1  -4   0    0.30    0.12 
  -1  -4   0    0.38    0.11 
   1  -4   0    0.48    0.14 
  -1  -4   0    0.39    0.13 
   1  -4   0    0.43    0.12 
   1  -4   0    0.59    0.15 
  -1  -4   0    0.48    0.12 
   1  -4   0    0.67    0.14 
   1  -4   0    0.60    0.13 
  -1  -4   0    0.61    0.14 
  -1   4   0    0.36    0.10 
  -1   4   0    0.39    0.13 
   1   4   0    0.46    0.10 
   1   4   0    0.41    0.12 
   1   4   0    0.41    0.11 
  -1   4   0    0.77    0.17 
  -1   4   0    0.22    0.10 
   1   4   0    0.36    0.12 
  -2  -4   0  438.76    9.15 
  -2  -4   0  450.45    9.13 
  -2  -4   0  438.10    9.17 
  -2  -4   0  444.93    9.19 
   2  -4   0  440.20    9.13 
   2  -4   0  457.96    9.08 
   2  -4   0  440.15    9.24 
   2  -4   0  441.63    9.23 
   2  -4   0  444.43    9.14 
  -2  -4   0  438.83    9.18 
  -2  -4   0  435.85    9.11 
  -2   4   0  451.33    9.24 
   2   4   0  438.55    9.16 
  -2   4   0  432.67    9.21 
  -2   4   0  459.71    9.20 
   2   4   0  442.81    9.10 
   2   4   0  453.41    9.00 
   2   4   0  454.07    9.16 
  -2   4   0  440.70    9.12 
   3  -4   0   77.87    1.82 
  -3  -4   0   75.91    1.82 
  -3  -4   0   77.06    1.87 
  -3  -4   0   75.29    1.82 
  -3  -4   0   74.46    1.83 
   3  -4   0   73.91    1.90 
  -3  -4   0   72.77    1.77 
   3  -4   0   76.71    1.93 
  -3  -4   0   73.08    1.83 
  -3  -4   0   74.99    1.83 
   3  -4   0   76.84    1.75 
   3   4   0   73.72    1.79 
  -3   4   0   78.62    1.84 
  -3   4   0   78.92    1.89 
  -3   4   0   73.54    1.89 
   3   4   0   73.73    1.77 
  -3   4   0   74.78    1.90 
   4  -4   0  310.53    6.45 
  -4  -4   0  292.42    6.25 
   4  -4   0  304.29    6.20 
   4  -4   0  298.58    6.28 
  -4  -4   0  303.48    6.31 
  -4  -4   0  291.69    6.34 
  -4  -4   0  297.34    6.28 
   4  -4   0  301.77    6.27 
  -4  -4   0  303.08    6.30 
   4  -4   0  297.32    6.40 
  -4  -4   0  288.87    6.29 
  -4  -4   0  302.22    6.31 
  -4  -4   0  299.65    6.28 
  -4   4   0  303.13    6.41 
  -4   4   0  301.84    6.42 
  -4   4   0  305.86    6.37 
   4   4   0  300.82    6.24 
   4   4   0  296.58    6.25 
  -4   4   0  301.06    6.39 
   5  -4   0   28.39    0.85 
   5  -4   0   27.31    0.93 
  -5  -4   0   27.56    0.87 
   5  -4   0   28.14    0.77 
  -5  -4   0   28.36    0.87 
  -5  -4   0   26.48    0.83 
  -5  -4   0   28.22    0.85 
  -5  -4   0   27.62    0.85 
  -5  -4   0   26.55    0.89 
   5  -4   0   28.65    0.96 
   5  -4   0   27.92    0.82 
  -5  -4   0   25.39    0.80 
  -5  -4   0   27.91    0.83 
   5   4   0   28.73    0.80 
  -5   4   0   26.68    0.92 
   5   4   0   27.93    0.81 
  -5   4   0   26.22    0.91 
  -5   4   0   26.49    0.91 
  -6  -4   0  147.55    3.39 
  -6  -4   0  146.93    3.31 
  -6  -4   0  147.83    3.26 
   6  -4   0  152.63    3.45 
   6  -4   0  149.92    3.19 
  -6  -4   0  149.51    3.34 
   6  -4   0  152.79    3.28 
   6  -4   0  146.18    3.46 
  -6  -4   0  148.23    3.39 
  -6  -4   0  146.88    3.26 
  -6  -4   0  146.69    3.28 
  -6  -4   0  146.93    3.28 
   6   4   0  152.01    3.21 
  -6   4   0  146.46    3.44 
  -6   4   0  150.48    3.45 
  -6   4   0  143.05    3.42 
   6   4   0  153.15    3.27 
   7  -4   0    5.09    0.25 
   7  -4   0    5.27    0.30 
  -7  -4   0    4.94    0.30 
  -7  -4   0    4.84    0.28 
   7  -4   0    4.38    0.36 
  -7  -4   0    5.01    0.31 
   7  -4   0    5.59    0.39 
  -7  -4   0    4.89    0.30 
  -7  -4   0    4.64    0.29 
  -7  -4   0    4.27    0.35 
  -7  -4   0    4.72    0.34 
  -7   4   0    4.84    0.37 
   7   4   0    4.78    0.30 
  -7   4   0    4.56    0.35 
  -7   4   0    4.65    0.37 
   7   4   0    4.90    0.25 
   8  -4   0  107.08    2.65 
  -8  -4   0  103.76    2.42 
  -8  -4   0  108.49    2.43 
   8  -4   0  101.69    2.60 
  -8  -4   0  106.79    2.57 
   8  -4   0  106.22    2.32 
  -8  -4   0  103.93    2.42 
   8  -4   0  102.26    2.39 
  -8  -4   0  104.73    2.63 
  -8  -4   0  104.42    2.37 
  -8  -4   0  107.48    2.47 
   8   4   0  105.74    2.28 
   8   4   0  106.30    2.45 
  -8   4   0  105.96    2.53 
  -8   4   0  106.12    2.62 
  -8   4   0  107.79    2.64 
  -8   4   0  102.86    2.66 
  -9  -4   0   13.49    0.53 
   9  -4   0   13.87    0.46 
  -9  -4   0   13.76    0.52 
  -9  -4   0   13.72    0.56 
  -9  -4   0   14.00    0.54 
   9  -4   0   13.65    0.67 
  -9  -4   0   13.26    0.49 
  -9  -4   0   14.39    0.70 
  -9  -4   0   13.59    0.63 
   9  -4   0   13.49    0.51 
  -9   4   0   13.25    0.62 
  -9   4   0   14.03    0.66 
  -9   4   0   14.88    0.69 
  -9   4   0   14.60    0.73 
  -9   4   0   13.45    0.63 
   9   4   0   14.39    0.57 
  -9   4   0   14.19    0.67 
 -10  -4   0   72.36    2.07 
 -10  -4   0   70.89    1.75 
 -10  -4   0   72.87    1.80 
 -10  -4   0   73.19    1.84 
 -10  -4   0   74.99    1.72 
 -10  -4   0   74.14    1.97 
  10  -4   0   73.77    1.68 
 -10  -4   0   74.60    1.79 
  10  -4   0   74.73    2.03 
  10  -4   0   74.33    1.76 
 -10   4   0   71.49    2.01 
 -10   4   0   73.03    2.12 
 -10   4   0   73.37    1.99 
  10   4   0   75.98    1.86 
 -10   4   0   72.09    1.96 
 -10   4   0   73.01    2.00 
 -10   4   0   72.56    2.00 
 -11  -4   0   -0.09    0.09 
 -11  -4   0   -0.01    0.08 
 -11  -4   0    0.30    0.10 
 -11  -4   0    0.28    0.12 
  11  -4   0    0.02    0.07 
 -11  -4   0    0.13    0.15 
  11  -4   0   -0.12    0.10 
  11  -4   0    0.21    0.11 
 -11  -4   0   -0.14    0.11 
 -11  -4   0    0.15    0.08 
 -11   4   0    0.19    0.18 
 -11   4   0    0.05    0.12 
 -11   4   0   -0.08    0.12 
 -11   4   0    0.07    0.15 
 -11   4   0    0.37    0.17 
 -11   4   0    0.04    0.13 
  11   4   0   -0.12    0.09 
 -12  -4   0   87.85    2.00 
 -12  -4   0   86.74    2.30 
 -12  -4   0   88.52    2.19 
 -12  -4   0   89.30    2.14 
  12  -4   0   89.94    1.96 
  12  -4   0   87.02    2.33 
 -12  -4   0   87.22    2.10 
 -12  -4   0   82.67    2.45 
  12  -4   0   84.30    2.01 
 -12  -4   0   87.61    1.96 
 -12  -4   0   88.48    2.08 
 -12   4   0   86.41    2.49 
 -12   4   0   87.12    2.40 
  12   4   0   86.93    2.18 
 -12   4   0   88.79    2.37 
 -12   4   0   86.80    2.35 
 -12   4   0   90.17    2.37 
 -13  -4   0   42.98    1.29 
 -13  -4   0   42.17    1.07 
 -13  -4   0   45.17    1.59 
  13  -4   0   40.94    1.39 
 -13  -4   0   41.01    1.37 
 -13  -4   0   42.36    1.18 
 -13  -4   0   42.61    1.04 
 -13  -4   0   42.47    1.22 
 -13  -4   0   42.37    1.16 
 -13   4   0   41.74    1.41 
 -13   4   0   42.84    1.56 
 -13   4   0   43.84    1.45 
 -13   4   0   42.13    1.42 
  13   4   0   42.96    1.29 
 -13   4   0   41.74    1.48 
 -14  -4   0   60.41    1.50 
 -14  -4   0   59.00    1.34 
  14  -4   0   60.40    1.57 
 -14  -4   0   55.94    1.73 
 -14  -4   0   58.40    1.55 
 -14  -4   0   58.41    1.96 
 -14  -4   0   59.89    1.32 
 -14  -4   0   57.91    1.66 
 -14   4   0   58.26    1.89 
 -14   4   0   56.58    1.94 
 -14   4   0   55.63    1.77 
 -14   4   0   57.96    1.79 
 -14   4   0   56.58    1.78 
  14   4   0   58.02    1.64 
 -15  -4   0    9.83    0.58 
 -15  -4   0   10.14    0.63 
  15  -4   0   10.14    0.50 
 -15  -4   0   10.50    0.47 
 -15  -4   0   11.70    0.79 
 -15   4   0   10.39    0.72 
 -15   4   0   10.31    0.76 
  15   4   0   11.07    0.59 
 -15   4   0   10.54    0.67 
 -15   4   0    9.56    0.64 
 -15   4   0   11.21    0.67 
 -16  -4   0    4.43    0.31 
 -16  -4   0    4.46    0.48 
 -16  -4   0    5.31    0.54 
 -16  -4   0    4.01    0.60 
 -16   4   0    5.05    0.55 
 -16   4   0    4.00    0.58 
 -16   4   0    4.27    0.58 
  16   4   0    4.19    0.45 
 -16   4   0    4.66    0.52 
 -16   4   0    4.37    0.52 
 -17  -4   0    5.99    0.59 
 -17  -4   0    5.75    0.72 
 -17  -4   0    4.95    0.52 
 -17   4   0    4.84    0.55 
 -17   4   0    6.05    0.71 
 -17   4   0    5.19    0.70 
 -17   4   0    6.17    0.64 
 -17   4   0    5.35    0.57 
 -18  -4   0    8.59    0.90 
 -18  -4   0    8.88    0.61 
 -18   4   0    8.21    0.65 
 -18   4   0    7.37    0.60 
 -18   4   0    8.37    0.87 
 -18   4   0    8.28    0.85 
 -19  -4   0    8.40    0.94 
 -19  -4   0    8.94    0.64 
 -19   4   0    7.05    0.85 
 -19   4   0    9.14    0.95 
 -19   4   0    8.15    0.66 
 -19   4   0    9.11    0.66 
 -20  -4   0    2.20    0.40 
 -20  -4   0    1.90    0.52 
 -20   4   0    2.92    0.58 
 -20   4   0    2.34    0.43 
 -20   4   0    2.14    0.51 
 -20   4   0    1.51    0.35 
 -21  -4   0    0.43    0.39 
 -21  -4   0    1.26    0.35 
 -21   4   0    1.80    0.39 
 -21   4   0    0.81    0.30 
 -21   4   0    0.84    0.39 
 -21   4   0    1.56    0.48 
 -22  -4   0    0.36    0.33 
 -22  -4   0    0.94    0.33 
 -22   4   0    0.72    0.37 
 -22   4   0    1.20    0.34 
 -22   4   0    0.47    0.26 
 -22   4   0    0.78    0.43 
 -23  -4   0    0.21    0.34 
 -23  -4   0    0.33    0.30 
  23  -4   0    0.63    0.35 
 -23   4   0   -0.07    0.21 
 -23   4   0   -0.04    0.25 
 -23   4   0    0.09    0.30 
 -23   4   0   -0.31    0.24 
 -24  -4   0    5.54    0.70 
 -24  -4   0    5.23    0.86 
 -24   4   0    4.51    0.81 
 -24   4   0    5.58    0.58 
 -24   4   0    5.33    0.84 
 -25  -4   0    1.12    0.50 
 -25   4   0    1.29    0.54 
 -25   4   0    0.92    0.29 
 -25   4   0    1.36    0.50 
 -26  -4   0   -0.26    0.30 
 -26   4   0    0.31    0.43 
 -26   4   0    0.18    0.37 
 -26   4   0   -0.24    0.17 
   0  -5   0    0.04    0.09 
   0  -5   0    0.07    0.09 
   0  -5   0    0.14    0.10 
   0  -5   0    0.12    0.10 
   0  -5   0    0.41    0.13 
   0   5   0    0.61    0.16 
   0   5   0    0.01    0.09 
   0   5   0    0.06    0.08 
   0   5   0    0.00    0.07 
  -1  -5   0   12.80    0.53 
   1  -5   0   12.82    0.60 
   1  -5   0   12.39    0.54 
  -1  -5   0   11.58    0.55 
  -1  -5   0   10.85    0.52 
  -1  -5   0   12.38    0.57 
   1  -5   0   12.50    0.51 
   1  -5   0   12.14    0.52 
   1  -5   0   12.99    0.60 
  -1   5   0   13.06    0.59 
  -1   5   0   12.97    0.55 
   1   5   0   12.71    0.56 
   1   5   0   12.56    0.45 
  -1   5   0   12.17    0.57 
  -1   5   0   12.78    0.50 
   1   5   0   11.83    0.51 
  -2  -5   0    2.68    0.30 
  -2  -5   0    2.63    0.28 
  -2  -5   0    2.70    0.28 
   2  -5   0    3.42    0.31 
   2  -5   0    2.57    0.32 
  -2  -5   0    2.81    0.31 
  -2  -5   0    3.13    0.32 
  -2  -5   0    2.96    0.32 
   2  -5   0    3.02    0.35 
   2  -5   0    2.42    0.28 
   2  -5   0    2.34    0.27 
   2   5   0    2.78    0.30 
   2   5   0    2.45    0.19 
  -2   5   0    2.79    0.28 
  -2   5   0    3.38    0.35 
  -2   5   0    2.24    0.29 
   2   5   0    2.66    0.29 
  -2   5   0    2.30    0.29 
   2   5   0    2.57    0.27 
   3  -5   0    7.23    0.40 
  -3  -5   0    7.99    0.43 
  -3  -5   0    8.54    0.46 
  -3  -5   0    7.63    0.41 
  -3  -5   0    7.94    0.43 
   3  -5   0    8.28    0.38 
  -3  -5   0    7.79    0.44 
   3  -5   0    6.44    0.44 
  -3  -5   0    8.07    0.44 
   3  -5   0    8.31    0.43 
   3  -5   0    8.04    0.47 
  -3  -5   0    8.60    0.42 
   3   5   0    7.76    0.41 
   3   5   0    8.32    0.33 
   3   5   0    7.50    0.38 
   3   5   0    8.22    0.43 
  -3   5   0    7.39    0.46 
  -3   5   0    7.31    0.46 
  -3   5   0    7.59    0.41 
  -3   5   0    7.44    0.44 
   4  -5   0    0.03    0.09 
  -4  -5   0   -0.10    0.08 
  -4  -5   0    0.13    0.10 
   4  -5   0   -0.04    0.08 
  -4  -5   0    0.02    0.10 
   4  -5   0    0.09    0.12 
  -4  -5   0    0.04    0.10 
  -4  -5   0    0.17    0.11 
  -4  -5   0    0.08    0.10 
   4  -5   0    0.21    0.13 
   4  -5   0    0.02    0.09 
  -4  -5   0    0.07    0.10 
   4   5   0    0.15    0.10 
  -4   5   0    0.20    0.13 
  -4   5   0   -0.02    0.10 
  -4   5   0   -0.01    0.10 
   4   5   0    0.10    0.07 
  -4   5   0   -0.02    0.10 
   4   5   0    0.12    0.10 
  -5  -5   0   20.77    0.77 
   5  -5   0   20.85    0.84 
   5  -5   0   20.57    0.74 
  -5  -5   0   21.41    0.76 
  -5  -5   0   20.69    0.72 
  -5  -5   0   19.75    0.75 
  -5  -5   0   20.06    0.78 
  -5  -5   0   19.89    0.75 
  -5  -5   0   20.32    0.73 
  -5  -5   0   20.21    0.74 
   5  -5   0   20.90    0.74 
   5  -5   0   22.06    0.87 
   5  -5   0   21.73    0.68 
   5   5   0   20.99    0.71 
  -5   5   0   20.66    0.84 
  -5   5   0   21.92    0.84 
  -5   5   0   20.25    0.79 
   5   5   0   19.81    0.70 
  -5   5   0   19.69    0.81 
  -6  -5   0   38.46    1.11 
   6  -5   0   38.35    1.26 
  -6  -5   0   39.44    1.21 
  -6  -5   0   39.12    1.18 
  -6  -5   0   37.43    1.11 
   6  -5   0   36.79    1.10 
   6  -5   0   39.58    1.29 
   6  -5   0   38.01    1.13 
   6  -5   0   38.30    1.04 
  -6  -5   0   36.34    1.14 
  -6  -5   0   38.48    1.14 
  -6  -5   0   38.48    1.14 
  -6  -5   0   38.30    1.16 
   6   5   0   36.97    1.06 
  -6   5   0   37.75    1.22 
   6   5   0   38.96    1.09 
  -6   5   0   36.61    1.24 
  -6   5   0   39.45    1.26 
   7  -5   0   28.37    0.82 
   7  -5   0   28.10    0.92 
  -7  -5   0   27.41    0.88 
  -7  -5   0   27.63    0.97 
  -7  -5   0   28.11    0.94 
  -7  -5   0   26.29    0.89 
  -7  -5   0   28.83    0.97 
  -7  -5   0   27.94    0.98 
   7  -5   0   26.83    1.02 
  -7  -5   0   27.18    0.88 
  -7  -5   0   27.30    0.90 
   7  -5   0   27.67    0.89 
   7  -5   0   27.21    1.05 
  -7   5   0   30.04    1.07 
   7   5   0   28.41    0.84 
  -7   5   0   26.95    1.02 
   7   5   0   27.81    0.88 
  -7   5   0   28.92    1.05 
   8  -5   0   11.19    0.54 
  -8  -5   0   12.12    0.53 
   8  -5   0   12.29    0.66 
  -8  -5   0   12.36    0.57 
  -8  -5   0   11.78    0.61 
  -8  -5   0   11.95    0.62 
  -8  -5   0   11.70    0.53 
   8  -5   0   11.48    0.46 
  -8  -5   0   12.83    0.55 
   8  -5   0   12.07    0.52 
  -8  -5   0   11.94    0.51 
   8  -5   0   12.41    0.66 
  -8   5   0   11.80    0.65 
   8   5   0   12.04    0.46 
  -8   5   0   11.45    0.64 
  -8   5   0   11.95    0.65 
   8   5   0   12.34    0.53 
  -9  -5   0   12.07    0.62 
   9  -5   0   11.57    0.66 
   9  -5   0   12.84    0.57 
  -9  -5   0   11.50    0.63 
  -9  -5   0   12.28    0.54 
  -9  -5   0   11.91    0.51 
  -9  -5   0   11.57    0.53 
  -9  -5   0   10.97    0.55 
   9  -5   0   12.28    0.53 
  -9  -5   0   12.20    0.54 
   9  -5   0   10.89    0.65 
   9  -5   0   11.95    0.46 
   9   5   0   11.36    0.53 
   9   5   0   12.08    0.43 
  -9   5   0   11.64    0.65 
  -9   5   0   12.71    0.60 
  -9   5   0   12.18    0.67 
  -9   5   0   11.84    0.68 
 -10  -5   0   23.98    0.87 
 -10  -5   0   23.49    0.81 
 -10  -5   0   23.19    0.93 
  10  -5   0   22.44    0.83 
 -10  -5   0   23.31    0.77 
 -10  -5   0   24.54    1.01 
  10  -5   0   24.83    0.81 
  10  -5   0   24.23    1.01 
  10  -5   0   24.91    0.73 
 -10  -5   0   25.03    0.83 
 -10  -5   0   25.09    0.83 
  10   5   0   23.28    0.83 
 -10   5   0   23.29    0.91 
 -10   5   0   23.91    0.99 
 -10   5   0   22.75    0.97 
 -10   5   0   22.80    0.99 
 -10   5   0   23.37    1.03 
 -11  -5   0   24.83    0.87 
  11  -5   0   25.98    0.91 
  11  -5   0   25.90    0.85 
  11  -5   0   26.21    1.08 
 -11  -5   0   24.81    0.80 
 -11  -5   0   28.51    0.89 
 -11  -5   0   25.56    0.92 
 -11  -5   0   26.36    0.86 
 -11  -5   0   26.48    1.01 
 -11  -5   0   24.95    1.07 
  11  -5   0   26.56    0.77 
 -11  -5   0   25.52    0.85 
 -11   5   0   25.42    1.05 
 -11   5   0   26.94    1.03 
 -11   5   0   26.28    1.08 
 -11   5   0   25.43    1.05 
  11   5   0   25.96    0.90 
 -11   5   0   26.55    1.13 
  12  -5   0   34.40    1.10 
 -12  -5   0   34.87    1.34 
 -12  -5   0   34.43    1.01 
 -12  -5   0   35.14    1.12 
 -12  -5   0   33.84    1.03 
 -12  -5   0   34.03    1.06 
  12  -5   0   34.36    1.02 
  12  -5   0   33.43    1.27 
 -12  -5   0   32.77    0.95 
 -12  -5   0   32.76    1.19 
  12   5   0   34.13    1.09 
 -12   5   0   31.62    1.31 
 -12   5   0   34.88    1.28 
 -12   5   0   31.77    1.25 
 -12   5   0   34.11    1.29 
 -12   5   0   34.75    1.25 
 -13  -5   0   15.56    0.59 
  13  -5   0   15.78    0.84 
  13  -5   0   17.60    0.71 
 -13  -5   0   18.02    0.93 
 -13  -5   0   16.42    0.67 
 -13  -5   0   15.93    0.56 
 -13  -5   0   16.02    0.78 
 -13  -5   0   15.62    0.69 
 -13  -5   0   16.20    0.64 
 -13   5   0   17.22    0.87 
 -13   5   0   16.62    0.85 
 -13   5   0   14.96    0.81 
 -13   5   0   16.66    0.93 
  13   5   0   15.46    0.69 
 -13   5   0   14.22    0.81 
 -14  -5   0    8.41    0.68 
 -14  -5   0    7.32    0.55 
 -14  -5   0    8.59    0.37 
 -14  -5   0    8.46    0.50 
 -14  -5   0    8.46    0.39 
  14  -5   0    7.74    0.48 
 -14  -5   0    9.20    0.47 
 -14   5   0    9.22    0.66 
 -14   5   0    9.35    0.64 
 -14   5   0    8.83    0.63 
  14   5   0    8.34    0.51 
 -14   5   0    9.61    0.65 
 -14   5   0    8.86    0.70 
  15  -5   0   10.57    0.55 
 -15  -5   0    9.95    0.75 
 -15  -5   0   10.37    0.50 
 -15  -5   0    9.57    0.63 
 -15  -5   0    9.75    0.37 
 -15  -5   0    9.93    0.39 
 -15   5   0   10.37    0.71 
 -15   5   0   10.00    0.69 
 -15   5   0   10.30    0.77 
  15   5   0    9.82    0.56 
 -15   5   0    8.31    0.65 
 -15   5   0    9.02    0.66 
  16  -5   0    7.71    0.48 
 -16  -5   0    7.16    0.77 
 -16  -5   0    8.18    0.59 
 -16  -5   0    8.71    0.45 
 -16   5   0    8.68    0.88 
 -16   5   0    7.24    0.60 
 -16   5   0    7.10    0.61 
 -16   5   0    6.62    0.73 
 -16   5   0    8.04    0.62 
 -17  -5   0   14.87    0.81 
 -17  -5   0   15.65    1.00 
 -17   5   0   12.36    0.81 
 -17   5   0   13.59    0.89 
 -17   5   0   13.92    0.83 
 -17   5   0   14.88    0.88 
 -17   5   0   16.14    1.00 
 -18  -5   0   20.67    1.19 
 -18   5   0   20.06    1.13 
 -18   5   0   19.02    1.01 
 -18   5   0   18.37    1.13 
 -18   5   0   19.94    1.03 
 -19  -5   0   13.13    0.98 
 -19   5   0   12.62    0.97 
 -19   5   0   12.29    0.93 
 -19   5   0   12.52    0.82 
 -19   5   0   12.81    0.85 
 -20  -5   0   12.47    1.01 
 -20   5   0   12.44    0.86 
 -20   5   0    9.97    1.03 
 -20   5   0   10.53    0.77 
 -20   5   0   13.80    0.98 
 -21  -5   0   36.12    1.77 
 -21   5   0   38.35    1.79 
 -21   5   0   35.83    1.48 
 -21   5   0   37.97    1.58 
 -21   5   0   35.84    1.72 
 -22  -5   0   28.20    1.61 
 -22   5   0   34.21    1.70 
 -22   5   0   31.74    1.66 
 -22   5   0   31.85    1.39 
 -22   5   0   34.87    1.51 
 -23  -5   0   18.52    1.34 
 -23   5   0   18.90    1.13 
 -23   5   0   18.77    1.27 
 -23   5   0   18.89    1.30 
 -23   5   0   17.72    1.01 
 -24  -5   0   21.03    1.45 
 -24   5   0   22.57    1.46 
 -24   5   0   22.37    1.45 
 -24   5   0   21.75    1.24 
 -24   5   0   21.59    1.11 
 -25  -5   0   18.70    1.39 
 -25   5   0   21.57    1.46 
 -25   5   0   20.04    1.06 
 -25   5   0   21.01    1.44 
 -26  -5   0   17.96    1.42 
 -26   5   0   19.78    1.44 
 -26   5   0   18.06    0.99 
 -26   5   0   18.68    1.36 
   0  -6   0   15.83    0.66 
   0  -6   0   15.85    0.72 
   0  -6   0   16.64    0.74 
   0  -6   0   15.93    0.69 
   0  -6   0   15.97    0.65 
   0   6   0   15.60    0.71 
   0   6   0   15.91    0.71 
   0   6   0   16.45    0.68 
   0   6   0   16.22    0.60 
   1  -6   0  154.01    3.61 
   1  -6   0  154.30    3.54 
   1  -6   0  159.37    3.71 
  -1  -6   0  154.79    3.63 
  -1  -6   0  155.44    3.57 
   1  -6   0  157.32    3.72 
   1  -6   0  155.94    3.58 
  -1  -6   0  152.00    3.68 
  -1  -6   0  161.55    3.69 
  -1   6   0  156.86    3.50 
  -1   6   0  156.10    3.68 
  -1   6   0  152.85    3.68 
   1   6   0  155.78    3.57 
  -1   6   0  151.43    3.60 
   1   6   0  162.38    3.66 
   1   6   0  163.46    3.68 
   1   6   0  161.37    3.45 
   2  -6   0    3.65    0.38 
   2  -6   0    3.95    0.38 
   2  -6   0    3.46    0.42 
   2  -6   0    3.83    0.30 
  -2  -6   0    4.05    0.38 
  -2  -6   0    3.30    0.37 
   2  -6   0    3.90    0.44 
  -2  -6   0    3.12    0.37 
  -2  -6   0    4.52    0.34 
  -2  -6   0    3.80    0.39 
  -2   6   0    4.10    0.41 
   2   6   0    4.13    0.35 
   2   6   0    4.33    0.32 
  -2   6   0    4.30    0.45 
  -2   6   0    3.75    0.36 
   2   6   0    3.78    0.26 
   2   6   0    4.50    0.36 
  -2   6   0    3.50    0.41 
   3  -6   0  243.54    5.60 
   3  -6   0  245.24    5.42 
  -3  -6   0  246.00    5.50 
  -3  -6   0  243.37    5.50 
  -3  -6   0  246.16    5.43 
  -3  -6   0  244.48    5.47 
   3  -6   0  251.50    5.36 
  -3  -6   0  245.19    5.40 
   3  -6   0  249.06    5.45 
  -3  -6   0  249.62    5.49 
   3  -6   0  244.90    5.57 
   3   6   0  252.57    5.45 
   3   6   0  246.84    5.47 
   3   6   0  259.48    5.40 
  -3   6   0  256.07    5.58 
  -3   6   0  248.22    5.51 
  -3   6   0  250.54    5.58 
  -3   6   0  250.07    5.42 
   3   6   0  254.61    5.23 
  -4  -6   0   10.33    0.55 
  -4  -6   0   10.53    0.56 
   4  -6   0   10.24    0.53 
  -4  -6   0    9.95    0.51 
   4  -6   0   11.27    0.62 
  -4  -6   0   11.78    0.60 
   4  -6   0   10.27    0.49 
   4  -6   0   10.76    0.63 
  -4  -6   0   10.60    0.57 
  -4  -6   0   12.04    0.58 
  -4  -6   0   11.48    0.58 
   4  -6   0   10.51    0.53 
  -4   6   0   11.46    0.61 
  -4   6   0    8.97    0.56 
  -4   6   0   11.50    0.57 
   4   6   0   10.56    0.42 
   4   6   0   10.91    0.54 
  -4   6   0   10.81    0.61 
   4   6   0   11.40    0.51 
  -5  -6   0  131.76    3.20 
   5  -6   0  139.90    3.09 
  -5  -6   0  135.46    3.28 
   5  -6   0  131.49    3.37 
   5  -6   0  135.90    3.19 
  -5  -6   0  135.48    3.23 
   5  -6   0  138.65    3.20 
  -5  -6   0  132.85    3.21 
  -5  -6   0  138.19    3.24 
   5  -6   0  139.39    3.37 
  -5  -6   0  137.33    3.17 
  -5  -6   0  136.40    3.21 
  -5   6   0  136.93    3.36 
  -5   6   0  134.92    3.32 
  -5   6   0  134.32    3.25 
   5   6   0  133.79    2.97 
   5   6   0  135.57    3.11 
   5   6   0  136.98    3.16 
  -5   6   0  135.41    3.34 
  -6  -6   0    0.00    0.11 
  -6  -6   0    0.12    0.12 
  -6  -6   0    0.26    0.14 
   6  -6   0    0.03    0.09 
   6  -6   0    0.19    0.13 
  -6  -6   0    0.34    0.14 
  -6  -6   0    0.07    0.13 
  -6  -6   0    0.25    0.14 
  -6  -6   0    0.00    0.12 
  -6  -6   0    0.24    0.15 
   6  -6   0    0.03    0.15 
   6  -6   0    0.10    0.11 
   6  -6   0   -0.09    0.12 
   6   6   0    0.22    0.13 
  -6   6   0   -0.02    0.12 
  -6   6   0    0.24    0.17 
  -6   6   0   -0.11    0.11 
  -6   6   0    0.22    0.16 
   6   6   0    0.03    0.10 
  -7  -6   0   73.33    1.96 
  -7  -6   0   71.41    1.99 
   7  -6   0   74.66    1.94 
  -7  -6   0   75.19    1.99 
  -7  -6   0   74.64    1.94 
   7  -6   0   72.84    1.83 
  -7  -6   0   75.63    2.05 
   7  -6   0   75.38    2.17 
   7  -6   0   75.45    1.96 
  -7  -6   0   72.40    1.91 
   7  -6   0   72.75    2.11 
  -7  -6   0   71.81    1.98 
  -7  -6   0   71.42    1.95 
  -7   6   0   75.47    2.09 
  -7   6   0   72.67    2.13 
   7   6   0   76.22    1.87 
  -7   6   0   76.93    2.15 
   7   6   0   75.49    1.89 
   8  -6   0    1.88    0.27 
  -8  -6   0    2.01    0.28 
  -8  -6   0    1.97    0.32 
  -8  -6   0    1.74    0.29 
   8  -6   0    2.32    0.30 
  -8  -6   0    1.68    0.27 
  -8  -6   0    1.94    0.27 
  -8  -6   0    2.06    0.28 
   8  -6   0    1.62    0.22 
  -8  -6   0    1.98    0.31 
   8  -6   0    1.91    0.36 
   8  -6   0    1.68    0.34 
   8   6   0    1.77    0.23 
  -8   6   0    1.37    0.28 
  -8   6   0    1.99    0.36 
   8   6   0    1.41    0.23 
  -8   6   0    2.20    0.36 
  -9  -6   0   46.03    1.43 
   9  -6   0   48.72    1.39 
  -9  -6   0   47.28    1.38 
   9  -6   0   48.22    1.62 
   9  -6   0   45.97    1.40 
  -9  -6   0   46.14    1.49 
  -9  -6   0   47.27    1.50 
  -9  -6   0   45.95    1.38 
  -9  -6   0   46.68    1.35 
   9  -6   0   46.04    1.26 
  -9  -6   0   47.12    1.39 
  -9   6   0   49.62    1.61 
  -9   6   0   46.19    1.40 
  -9   6   0   49.74    1.62 
  -9   6   0   47.84    1.59 
   9   6   0   46.09    1.34 
 -10  -6   0    1.30    0.24 
 -10  -6   0    1.34    0.25 
 -10  -6   0    1.79    0.28 
 -10  -6   0    1.35    0.28 
  10  -6   0    0.96    0.22 
 -10  -6   0    0.91    0.27 
 -10  -6   0    1.19    0.20 
  10  -6   0    1.47    0.26 
  10  -6   0    1.49    0.34 
 -10  -6   0    0.90    0.20 
  10  -6   0    1.51    0.22 
 -10   6   0    1.08    0.28 
 -10   6   0    1.04    0.24 
 -10   6   0    0.97    0.27 
 -10   6   0    0.69    0.27 
  10   6   0    1.18    0.22 
 -11  -6   0   52.07    1.50 
  11  -6   0   50.69    1.36 
 -11  -6   0   53.49    1.45 
  11  -6   0   49.15    1.51 
 -11  -6   0   51.15    1.64 
  11  -6   0   54.93    1.79 
 -11  -6   0   52.55    1.49 
  11  -6   0   55.21    1.51 
 -11  -6   0   52.72    1.72 
 -11  -6   0   51.04    1.56 
 -11  -6   0   52.10    1.49 
 -11   6   0   53.70    1.75 
  11   6   0   52.23    1.49 
 -11   6   0   50.48    1.60 
 -11   6   0   53.74    1.80 
 -11   6   0   49.33    1.71 
 -11   6   0   54.01    1.77 
 -12  -6   0    8.34    0.49 
 -12  -6   0    9.48    0.51 
 -12  -6   0   10.12    0.49 
 -12  -6   0    9.48    0.66 
  12  -6   0    9.50    0.69 
 -12  -6   0    9.43    0.52 
 -12  -6   0    9.33    0.51 
  12  -6   0    9.55    0.55 
  12  -6   0   10.36    0.53 
 -12  -6   0    8.24    0.59 
 -12  -6   0    9.90    0.58 
 -12   6   0    9.86    0.63 
 -12   6   0   10.30    0.72 
 -12   6   0    9.60    0.69 
 -12   6   0   10.51    0.69 
  12   6   0    8.54    0.50 
 -12   6   0   10.44    0.70 
 -13  -6   0   52.10    1.50 
  13  -6   0   52.48    1.77 
  13  -6   0   53.36    1.54 
 -13  -6   0   51.61    1.47 
 -13  -6   0   51.60    1.44 
 -13  -6   0   49.72    1.55 
 -13  -6   0   48.79    1.75 
 -13  -6   0   51.28    1.67 
 -13  -6   0   49.52    1.37 
 -13   6   0   48.55    1.75 
 -13   6   0   50.58    1.76 
 -13   6   0   50.40    1.74 
 -13   6   0   49.00    1.80 
 -13   6   0   51.86    1.69 
  13   6   0   49.33    1.48 
 -14  -6   0    5.16    0.36 
 -14  -6   0    6.02    0.54 
 -14  -6   0    4.64    0.54 
 -14  -6   0    5.79    0.65 
 -14  -6   0    5.39    0.34 
 -14  -6   0    5.61    0.40 
  14  -6   0    5.51    0.50 
 -14   6   0    6.44    0.68 
 -14   6   0    5.13    0.65 
  14   6   0    5.84    0.50 
 -14   6   0    5.18    0.60 
 -14   6   0    4.43    0.56 
 -14   6   0    4.87    0.60 
 -15  -6   0    7.63    0.59 
  15  -6   0    6.45    0.46 
 -15  -6   0    5.91    0.41 
 -15  -6   0    6.12    0.36 
 -15  -6   0    6.07    0.70 
 -15  -6   0    5.95    0.34 
 -15   6   0    6.12    0.73 
 -15   6   0    6.16    0.67 
 -15   6   0    4.95    0.62 
 -15   6   0    6.61    0.68 
 -15   6   0    7.05    0.71 
 -16  -6   0    0.62    0.33 
 -16  -6   0    1.02    0.16 
 -16  -6   0    1.10    0.17 
 -16  -6   0    0.73    0.28 
 -16  -6   0    1.02    0.22 
  16  -6   0    1.13    0.26 
 -16   6   0    0.92    0.30 
 -16   6   0    0.68    0.29 
 -16   6   0    0.57    0.34 
 -16   6   0    1.07    0.35 
 -17  -6   0    8.05    0.65 
 -17  -6   0    7.46    0.82 
 -17   6   0    8.27    0.84 
 -17   6   0    6.95    0.82 
 -17   6   0    6.55    0.72 
 -17   6   0    8.10    0.79 
 -17   6   0    7.44    0.78 
 -18  -6   0    4.22    0.65 
 -18   6   0    3.46    0.55 
 -18   6   0    3.86    0.66 
 -18   6   0    4.07    0.59 
 -18   6   0    4.96    0.68 
 -19  -6   0    3.31    0.64 
 -19   6   0    3.18    0.55 
 -19   6   0    2.95    0.57 
 -19   6   0    2.70    0.52 
 -19   6   0    2.32    0.53 
 -20  -6   0    0.80    0.37 
 -20   6   0    0.28    0.31 
 -20   6   0    1.26    0.39 
 -20   6   0    0.54    0.30 
 -20   6   0    1.10    0.38 
 -21  -6   0    1.50    0.48 
 -21   6   0    3.18    0.58 
 -21   6   0    2.12    0.47 
 -21   6   0    1.60    0.53 
 -21   6   0    2.57    0.58 
 -22  -6   0    1.84    0.52 
 -22   6   0    2.34    0.57 
 -22   6   0    1.34    0.47 
 -22   6   0    1.77    0.44 
 -22   6   0    2.62    0.55 
 -23  -6   0    0.24    0.37 
 -23   6   0    0.33    0.29 
 -23   6   0   -0.30    0.31 
 -23   6   0    0.25    0.31 
 -23   6   0    0.03    0.35 
 -24  -6   0    0.61    0.42 
 -24   6   0    1.29    0.41 
 -24   6   0    1.29    0.52 
 -24   6   0    0.77    0.44 
 -24   6   0    1.18    0.44 
 -25  -6   0    1.84    0.58 
 -25   6   0    0.47    0.42 
 -25   6   0    0.56    0.34 
 -25   6   0    0.98    0.42 
 -25   6   0    0.77    0.47 
   0  -7   0   -0.05    0.12 
   0  -7   0    0.11    0.13 
   0  -7   0    0.15    0.13 
   0  -7   0    0.11    0.12 
   0  -7   0    0.02    0.11 
   0   7   0    0.05    0.13 
   0   7   0    0.04    0.11 
   0   7   0    0.08    0.09 
   0   7   0    0.08    0.14 
   1  -7   0    6.45    0.43 
  -1  -7   0    6.21    0.43 
   1  -7   0    6.23    0.50 
   1  -7   0    5.32    0.40 
  -1  -7   0    6.06    0.43 
  -1  -7   0    5.44    0.45 
  -1  -7   0    6.66    0.47 
   1  -7   0    6.36    0.45 
  -1  -7   0    6.02    0.47 
   1  -7   0    5.67    0.46 
   1   7   0    6.26    0.46 
   1   7   0    5.91    0.46 
  -1   7   0    6.00    0.38 
   1   7   0    5.72    0.41 
  -1   7   0    5.75    0.43 
  -1   7   0    6.45    0.49 
  -1   7   0    5.75    0.46 
   1   7   0    5.22    0.34 
  -2  -7   0    7.13    0.51 
   2  -7   0    7.59    0.49 
   2  -7   0    7.19    0.44 
  -2  -7   0    6.72    0.47 
   2  -7   0    6.58    0.52 
  -2  -7   0    7.09    0.50 
  -2  -7   0    7.95    0.48 
   2  -7   0    7.39    0.54 
   2  -7   0    7.20    0.47 
  -2  -7   0    6.81    0.45 
   2   7   0    7.05    0.48 
  -2   7   0    8.23    0.52 
  -2   7   0    6.16    0.41 
   2   7   0    7.74    0.39 
  -2   7   0    7.16    0.52 
   2   7   0    7.69    0.51 
   2   7   0    7.00    0.45 
  -2   7   0    6.63    0.51 
   3  -7   0    4.18    0.41 
   3  -7   0    4.30    0.43 
  -3  -7   0    5.33    0.52 
  -3  -7   0    5.07    0.38 
  -3  -7   0    4.86    0.49 
  -3  -7   0    4.50    0.47 
   3  -7   0    5.52    0.58 
  -3  -7   0    5.13    0.40 
   3  -7   0    4.63    0.51 
   3  -7   0    4.11    0.43 
  -3   7   0    4.92    0.51 
   3   7   0    5.29    0.41 
  -3   7   0    4.49    0.37 
   3   7   0    5.38    0.39 
  -3   7   0    4.36    0.48 
   3   7   0    5.25    0.42 
   3   7   0    4.91    0.30 
  -3   7   0    5.00    0.49 
   4  -7   0    0.02    0.13 
   4  -7   0    0.06    0.12 
   4  -7   0    0.07    0.12 
  -4  -7   0    0.02    0.12 
  -4  -7   0    0.29    0.16 
   4  -7   0    0.13    0.14 
   4  -7   0    0.17    0.13 
  -4  -7   0    0.05    0.12 
  -4  -7   0    0.04    0.12 
  -4  -7   0    0.05    0.13 
  -4  -7   0   -0.12    0.08 
   4   7   0    0.06    0.12 
  -4   7   0    0.22    0.16 
  -4   7   0    0.03    0.11 
  -4   7   0    0.08    0.12 
  -4   7   0   -0.05    0.14 
   4   7   0    0.11    0.12 
   4   7   0    0.14    0.09 
  -5  -7   0    0.19    0.15 
   5  -7   0    0.10    0.12 
  -5  -7   0    0.09    0.12 
   5  -7   0    0.12    0.16 
   5  -7   0    0.01    0.14 
  -5  -7   0    0.02    0.12 
  -5  -7   0   -0.02    0.11 
  -5  -7   0    0.04    0.11 
  -5  -7   0    0.14    0.14 
   5  -7   0    0.09    0.12 
   5  -7   0    0.16    0.12 
   5   7   0    0.09    0.12 
  -5   7   0    0.11    0.14 
   5   7   0    0.23    0.13 
  -5   7   0    0.04    0.15 
   5   7   0    0.11    0.09 
  -5   7   0    0.10    0.13 
  -5   7   0    0.01    0.13 
  -6  -7   0    4.62    0.47 
  -6  -7   0    4.67    0.48 
   6  -7   0    4.90    0.35 
   6  -7   0    4.51    0.52 
  -6  -7   0    5.45    0.49 
  -6  -7   0    4.35    0.49 
   6  -7   0    5.13    0.40 
   6  -7   0    4.79    0.55 
  -6  -7   0    4.98    0.49 
   6  -7   0    5.07    0.48 
  -6  -7   0    3.28    0.40 
  -6   7   0    4.24    0.49 
  -6   7   0    4.88    0.57 
   6   7   0    4.08    0.35 
   6   7   0    4.35    0.28 
   6   7   0    4.54    0.35 
  -6   7   0    3.50    0.46 
  -6   7   0    4.94    0.50 
   7  -7   0   12.36    0.73 
   7  -7   0    9.43    0.56 
   7  -7   0   11.49    0.54 
  -7  -7   0   10.32    0.62 
   7  -7   0    9.89    0.57 
  -7  -7   0   11.06    0.61 
   7  -7   0   11.91    0.74 
  -7  -7   0   10.39    0.61 
  -7  -7   0   10.64    0.57 
  -7  -7   0   11.21    0.63 
  -7  -7   0    9.04    0.55 
  -7   7   0   10.85    0.70 
  -7   7   0   11.70    0.67 
  -7   7   0    9.82    0.66 
   7   7   0   10.04    0.53 
   7   7   0   10.96    0.54 
   8  -7   0    4.08    0.39 
  -8  -7   0    3.64    0.41 
  -8  -7   0    3.41    0.41 
  -8  -7   0    3.55    0.40 
   8  -7   0    3.97    0.53 
  -8  -7   0    2.82    0.35 
   8  -7   0    3.56    0.40 
  -8  -7   0    3.58    0.44 
  -8  -7   0    3.36    0.41 
   8  -7   0    4.05    0.43 
   8   7   0    3.45    0.37 
  -8   7   0    3.75    0.50 
  -8   7   0    3.47    0.49 
  -8   7   0    3.90    0.49 
  -9  -7   0    4.14    0.44 
  -9  -7   0    3.69    0.44 
   9  -7   0    4.63    0.47 
  -9  -7   0    3.91    0.48 
   9  -7   0    4.38    0.39 
  -9  -7   0    4.69    0.46 
  -9  -7   0    3.84    0.45 
   9  -7   0    4.37    0.45 
  -9  -7   0    4.82    0.38 
   9  -7   0    3.99    0.52 
  -9   7   0    4.17    0.54 
  -9   7   0    3.75    0.51 
  -9   7   0    4.42    0.56 
   9   7   0    4.23    0.41 
 -10  -7   0   16.68    0.82 
  10  -7   0   16.24    0.65 
 -10  -7   0   16.45    0.83 
 -10  -7   0   15.72    0.79 
  10  -7   0   15.71    0.76 
 -10  -7   0   16.69    0.75 
 -10  -7   0   16.07    0.75 
 -10  -7   0   15.67    0.71 
  10  -7   0   16.57    0.75 
  10  -7   0   16.66    0.93 
 -10   7   0   16.97    0.90 
  10   7   0   16.38    0.71 
 -10   7   0   16.65    0.91 
 -10   7   0   17.98    0.78 
 -10   7   0   14.88    0.88 
 -11  -7   0   27.50    1.02 
 -11  -7   0   26.94    1.14 
 -11  -7   0   27.36    1.02 
  11  -7   0   25.19    0.99 
  11  -7   0   27.48    0.91 
 -11  -7   0   28.70    1.00 
 -11  -7   0   26.84    1.12 
 -11  -7   0   27.23    1.09 
  11  -7   0   25.84    1.03 
  11  -7   0   25.70    1.21 
 -11   7   0   27.93    1.24 
 -11   7   0   27.88    1.25 
 -11   7   0   27.30    1.06 
 -11   7   0   27.75    1.23 
  11   7   0   28.11    0.99 
  12  -7   0    9.81    0.74 
  12  -7   0   10.68    0.59 
 -12  -7   0    9.40    0.62 
  12  -7   0   10.90    0.62 
 -12  -7   0    9.55    0.68 
 -12  -7   0    9.77    0.67 
 -12  -7   0   10.69    0.56 
 -12  -7   0   10.01    0.58 
 -12  -7   0    9.19    0.56 
 -12   7   0    9.84    0.64 
 -12   7   0   10.62    0.78 
  12   7   0    8.46    0.52 
 -12   7   0   12.10    0.80 
 -12   7   0   11.40    0.77 
 -12   7   0   10.40    0.73 
 -13  -7   0    2.54    0.36 
 -13  -7   0    2.96    0.50 
 -13  -7   0    2.14    0.29 
 -13  -7   0    2.44    0.42 
  13  -7   0    1.67    0.31 
 -13  -7   0    2.63    0.36 
 -13  -7   0    2.17    0.37 
  13  -7   0    2.98    0.51 
 -13   7   0    1.97    0.36 
 -13   7   0    2.31    0.43 
 -13   7   0    1.84    0.40 
  13   7   0    2.09    0.31 
 -13   7   0    2.16    0.42 
 -13   7   0    1.97    0.45 
  14  -7   0    5.35    0.52 
 -14  -7   0    4.93    0.58 
 -14  -7   0    4.37    0.35 
 -14  -7   0    4.60    0.60 
 -14  -7   0    4.81    0.48 
 -14  -7   0    5.83    0.58 
 -14   7   0    5.32    0.65 
 -14   7   0    5.47    0.60 
 -14   7   0    5.22    0.67 
 -14   7   0    4.73    0.65 
 -14   7   0    4.73    0.62 
 -15  -7   0    0.15    0.15 
 -15  -7   0    0.14    0.25 
 -15  -7   0    0.10    0.12 
 -15  -7   0    0.24    0.22 
  15  -7   0   -0.16    0.13 
 -15   7   0   -0.02    0.19 
 -15   7   0    0.13    0.24 
 -15   7   0    0.04    0.21 
 -15   7   0    0.05    0.21 
 -16  -7   0    9.78    0.70 
 -16  -7   0    8.43    0.89 
 -16  -7   0    9.87    0.57 
 -16  -7   0    9.06    0.46 
  16  -7   0   10.82    0.64 
 -16   7   0   10.91    0.80 
 -16   7   0    9.38    0.78 
 -16   7   0    8.61    0.93 
 -16   7   0   10.05    0.76 
 -16   7   0    9.91    0.80 
 -17  -7   0    0.59    0.15 
 -17  -7   0    0.22    0.26 
 -17  -7   0    0.55    0.29 
 -17   7   0    0.65    0.30 
 -17   7   0    0.46    0.29 
 -17   7   0    1.19    0.38 
 -17   7   0    0.27    0.25 
 -17   7   0    0.22    0.28 
 -18  -7   0   12.28    0.95 
 -18   7   0   10.46    0.85 
 -18   7   0   11.13    1.10 
 -18   7   0   11.04    0.85 
 -18   7   0   10.20    0.81 
 -19  -7   0    3.82    0.67 
 -19   7   0    4.03    0.70 
 -19   7   0    5.30    0.71 
 -19   7   0    4.41    0.67 
 -19   7   0    4.38    0.67 
 -20  -7   0   12.57    1.20 
 -20   7   0   12.81    0.96 
 -20   7   0   11.87    1.17 
 -20   7   0   11.23    0.93 
 -20   7   0   10.44    0.87 
 -21  -7   0    7.33    0.97 
 -21   7   0    6.05    0.78 
 -21   7   0    7.08    0.97 
 -21   7   0    7.33    0.92 
 -21   7   0    4.97    0.77 
 -22  -7   0    9.97    1.12 
 -22   7   0   10.63    1.10 
 -22   7   0    9.15    0.94 
 -22   7   0   11.13    1.08 
 -22   7   0    9.59    1.12 
 -23  -7   0    2.57    0.61 
 -23   7   0    2.69    0.54 
 -23   7   0    0.68    0.45 
 -23   7   0    4.15    0.75 
 -23   7   0    2.29    0.55 
 -24  -7   0   11.31    1.26 
 -24   7   0    9.73    1.16 
 -24   7   0    9.42    0.96 
 -24   7   0   11.03    1.10 
   0  -8   0   12.81    0.71 
   0  -8   0   14.43    0.71 
   0  -8   0   14.50    0.70 
   0  -8   0   14.37    0.79 
   0  -8   0   14.47    0.80 
   0   8   0   13.48    0.62 
   0   8   0   13.85    0.76 
   0   8   0   13.66    0.77 
   0   8   0   12.90    0.69 
   1  -8   0   36.64    1.40 
   1  -8   0   38.54    1.33 
  -1  -8   0   35.03    1.29 
  -1  -8   0   37.81    1.27 
   1  -8   0   37.04    1.38 
  -1  -8   0   35.36    1.34 
  -1  -8   0   39.05    1.28 
  -1  -8   0   36.95    1.38 
   1  -8   0   37.35    1.25 
   1  -8   0   36.60    1.27 
   1   8   0   36.84    1.12 
  -1   8   0   36.99    1.38 
  -1   8   0   36.18    1.35 
   1   8   0   35.74    1.25 
   1   8   0   35.65    1.31 
  -1   8   0   36.65    1.30 
  -1   8   0   37.65    1.18 
  -2  -8   0   46.41    1.55 
   2  -8   0   45.94    1.40 
   2  -8   0   46.10    1.49 
   2  -8   0   46.66    1.46 
  -2  -8   0   41.28    1.41 
   2  -8   0   43.79    1.58 
  -2  -8   0   43.26    1.41 
   2  -8   0   43.38    1.55 
  -2  -8   0   43.40    1.52 
  -2  -8   0   45.35    1.50 
   2   8   0   44.89    1.49 
  -2   8   0   41.97    1.51 
   2   8   0   43.29    1.25 
   2   8   0   42.24    1.40 
  -2   8   0   44.24    1.55 
  -2   8   0   42.43    1.46 
  -2   8   0   44.50    1.37 
  -3  -8   0   19.01    0.88 
   3  -8   0   20.18    0.91 
  -3  -8   0   20.80    0.89 
  -3  -8   0   22.28    0.96 
   3  -8   0   22.66    0.88 
   3  -8   0   22.45    1.03 
  -3  -8   0   22.77    1.00 
   3  -8   0   21.50    1.04 
  -3  -8   0   22.23    0.99 
   3  -8   0   21.10    0.90 
   3   8   0   20.12    0.92 
  -3   8   0   21.52    1.01 
   3   8   0   20.95    0.75 
   3   8   0   21.04    0.87 
  -3   8   0   21.97    1.02 
  -3   8   0   21.29    0.96 
  -3   8   0   21.30    0.88 
   4  -8   0   24.49    1.12 
  -4  -8   0   25.71    1.06 
   4  -8   0   23.22    1.11 
   4  -8   0   24.83    1.02 
  -4  -8   0   24.73    1.06 
  -4  -8   0   23.60    1.02 
  -4  -8   0   23.48    0.96 
  -4  -8   0   25.17    1.02 
   4  -8   0   23.10    0.97 
   4  -8   0   24.33    0.93 
   4   8   0   25.66    0.82 
   4   8   0   23.77    0.99 
  -4   8   0   24.09    1.05 
   4   8   0   25.44    0.96 
  -4   8   0   26.06    1.14 
  -4   8   0   23.22    1.08 
  -4   8   0   24.62    0.98 
   5  -8   0   38.92    1.51 
   5  -8   0   40.18    1.26 
  -5  -8   0   38.48    1.38 
  -5  -8   0   38.88    1.38 
  -5  -8   0   39.84    1.38 
   5  -8   0   38.66    1.34 
  -5  -8   0   38.14    1.31 
   5  -8   0   37.11    1.31 
   5  -8   0   37.60    1.47 
  -5  -8   0   37.71    1.36 
   5   8   0   37.14    1.09 
  -5   8   0   41.68    1.52 
   5   8   0   37.47    1.30 
  -5   8   0   40.47    1.49 
  -5   8   0   39.38    1.35 
  -5   8   0   38.20    1.42 
   5   8   0   38.17    1.26 
   6  -8   0   19.82    0.82 
  -6  -8   0   21.14    0.94 
  -6  -8   0   20.96    0.97 
   6  -8   0   19.36    0.88 
   6  -8   0   21.29    0.92 
  -6  -8   0   19.41    0.90 
  -6  -8   0   20.44    0.88 
  -6  -8   0   19.76    0.93 
   6  -8   0   21.38    1.04 
  -6  -8   0   20.49    0.95 
   6  -8   0   20.64    1.05 
  -6   8   0   21.18    0.95 
  -6   8   0   20.78    1.02 
  -6   8   0   19.27    0.97 
   6   8   0   20.43    0.71 
   6   8   0   19.34    0.82 
  -6   8   0   20.12    1.02 
   6   8   0   20.44    0.87 
   7  -8   0    3.61    0.40 
  -7  -8   0    2.55    0.40 
  -7  -8   0    2.17    0.36 
  -7  -8   0    3.28    0.45 
   7  -8   0    2.91    0.48 
  -7  -8   0    2.77    0.42 
   7  -8   0    2.33    0.38 
  -7  -8   0    2.73    0.39 
   7  -8   0    3.17    0.43 
  -7  -8   0    3.14    0.42 
   7   8   0    2.82    0.29 
   7   8   0    3.63    0.41 
  -7   8   0    3.57    0.53 
  -7   8   0    2.93    0.44 
  -7   8   0    2.92    0.47 
  -8  -8   0    0.15    0.18 
  -8  -8   0    0.62    0.22 
   8  -8   0    0.20    0.19 
   8  -8   0    0.36    0.17 
  -8  -8   0    0.67    0.25 
   8  -8   0    0.70    0.22 
   8  -8   0    0.47    0.25 
  -8  -8   0    0.16    0.16 
  -8  -8   0    0.74    0.24 
   8   8   0    0.76    0.21 
  -8   8   0    0.72    0.29 
  -8   8   0    0.34    0.22 
  -8   8   0    0.52    0.25 
  -9  -8   0   13.22    0.78 
   9  -8   0   14.16    0.73 
  -9  -8   0   12.61    0.69 
  -9  -8   0   12.95    0.75 
  -9  -8   0   13.88    0.72 
   9  -8   0   13.37    0.72 
  -9  -8   0   12.74    0.72 
   9  -8   0   13.43    0.87 
   9  -8   0   12.49    0.62 
  -9   8   0   13.91    0.86 
  -9   8   0   13.00    0.84 
   9   8   0   11.91    0.63 
  -9   8   0   13.01    0.80 
 -10  -8   0   29.01    1.15 
  10  -8   0   29.97    1.37 
 -10  -8   0   30.58    1.22 
 -10  -8   0   28.59    1.22 
 -10  -8   0   31.63    1.16 
  10  -8   0   28.92    1.14 
 -10  -8   0   31.57    1.15 
  10  -8   0   29.69    1.02 
  10  -8   0   29.67    1.14 
 -10   8   0   29.87    1.11 
 -10   8   0   29.33    1.30 
 -10   8   0   30.95    1.38 
 -10   8   0   31.65    1.37 
  10   8   0   30.47    1.08 
  11  -8   0    0.98    0.24 
 -11  -8   0    0.53    0.22 
 -11  -8   0    0.86    0.26 
  11  -8   0    0.62    0.23 
 -11  -8   0    0.68    0.26 
 -11  -8   0    0.79    0.29 
 -11  -8   0    0.71    0.23 
  11  -8   0    1.15    0.28 
 -11  -8   0    0.92    0.29 
  11  -8   0    0.67    0.30 
 -11   8   0    0.92    0.27 
 -11   8   0    1.24    0.37 
 -11   8   0    0.92    0.32 
 -11   8   0    0.32    0.26 
  11   8   0    1.14    0.26 
 -12  -8   0   27.11    1.07 
 -12  -8   0   27.07    1.08 
 -12  -8   0   26.45    1.17 
  12  -8   0   24.54    1.03 
 -12  -8   0   25.24    1.11 
  12  -8   0   25.63    1.28 
 -12  -8   0   27.02    1.18 
  12  -8   0   25.19    1.06 
 -12  -8   0   23.72    0.98 
  12   8   0   26.95    1.01 
 -12   8   0   27.31    1.30 
 -12   8   0   25.77    1.27 
 -12   8   0   24.22    1.06 
 -12   8   0   27.33    1.30 
 -13  -8   0    0.05    0.21 
 -13  -8   0    0.11    0.15 
 -13  -8   0    0.11    0.17 
 -13  -8   0    0.29    0.24 
  13  -8   0   -0.06    0.16 
  13  -8   0    0.03    0.27 
 -13  -8   0    0.26    0.22 
 -13   8   0   -0.03    0.24 
 -13   8   0    0.05    0.21 
 -13   8   0    0.32    0.22 
 -13   8   0   -0.21    0.17 
 -13   8   0    0.19    0.26 
  14  -8   0    4.98    0.55 
 -14  -8   0    4.64    0.46 
 -14  -8   0    4.79    0.58 
 -14  -8   0    5.17    0.53 
 -14  -8   0    7.35    0.76 
 -14  -8   0    5.06    0.61 
 -14   8   0    6.29    0.75 
 -14   8   0    3.58    0.58 
 -14   8   0    5.55    0.71 
 -14   8   0    6.55    0.77 
 -14   8   0    4.42    0.57 
 -15  -8   0    0.55    0.20 
 -15  -8   0    0.11    0.16 
 -15  -8   0    0.22    0.25 
  15  -8   0    0.60    0.27 
 -15  -8   0    0.41    0.26 
 -15  -8   0    0.63    0.31 
 -15   8   0    0.32    0.28 
 -15   8   0    0.05    0.24 
 -15   8   0    0.69    0.34 
 -15   8   0    0.35    0.26 
 -15   8   0    0.48    0.29 
 -16  -8   0    6.17    0.69 
  16  -8   0    6.48    0.63 
 -16  -8   0    7.81    0.86 
 -16  -8   0    6.96    0.53 
 -16  -8   0    6.97    0.45 
 -16   8   0    6.47    0.81 
 -16   8   0    6.58    0.78 
 -16   8   0    6.97    0.87 
 -16   8   0    7.97    0.90 
 -16   8   0    6.59    0.75 
 -17  -8   0    1.10    0.22 
 -17  -8   0    1.02    0.36 
  17  -8   0    1.66    0.36 
 -17  -8   0    1.36    0.42 
 -17   8   0    1.05    0.39 
 -17   8   0    0.75    0.33 
 -17   8   0    1.62    0.47 
 -17   8   0    1.51    0.50 
 -17   8   0    1.45    0.40 
 -18  -8   0    4.02    0.65 
 -18  -8   0    3.14    0.29 
 -18   8   0    2.51    0.55 
 -18   8   0    3.06    0.57 
 -18   8   0    2.77    0.62 
 -19  -8   0    0.32    0.35 
 -19   8   0    0.10    0.27 
 -19   8   0    0.23    0.30 
 -19   8   0    0.06    0.29 
 -20  -8   0    5.37    0.79 
 -20   8   0    4.96    0.78 
 -20   8   0    4.74    0.80 
 -20   8   0    4.66    0.72 
 -21  -8   0    0.51    0.38 
 -21   8   0    0.54    0.38 
 -21   8   0   -0.05    0.31 
 -21   8   0    0.26    0.33 
 -22  -8   0    8.01    1.01 
 -22   8   0    5.94    0.81 
 -22   8   0    6.45    0.96 
 -22   8   0    5.43    0.84 
 -23  -8   0    2.12    0.60 
 -23   8   0    2.58    0.58 
 -23   8   0    3.57    0.70 
 -23   8   0    3.65    0.79 
 -24  -8   0   -0.48    0.28 
 -24   8   0    0.32    0.42 
   0  -9   0   -0.02    0.19 
   0  -9   0   -0.02    0.17 
   0  -9   0    0.33    0.23 
   0  -9   0    0.06    0.19 
   0  -9   0   -0.07    0.19 
   0   9   0   -0.08    0.18 
   0   9   0    0.05    0.19 
   0   9   0    0.18    0.15 
  -1  -9   0    0.71    0.28 
  -1  -9   0    1.42    0.32 
   1  -9   0    0.42    0.25 
   1  -9   0    0.72    0.24 
  -1  -9   0    0.62    0.26 
  -1  -9   0    0.56    0.27 
   1  -9   0    0.74    0.25 
   1  -9   0    0.79    0.30 
   1  -9   0    0.54    0.24 
  -1  -9   0    0.90    0.27 
  -1   9   0    1.11    0.26 
   1   9   0    0.34    0.23 
  -1   9   0    0.84    0.29 
  -1   9   0    0.32    0.22 
   1   9   0    0.56    0.19 
   1   9   0    0.39    0.24 
   2  -9   0    0.47    0.26 
  -2  -9   0    0.34    0.23 
  -2  -9   0    0.65    0.27 
   2  -9   0    0.13    0.18 
   2  -9   0    0.18    0.22 
   2  -9   0    0.38    0.24 
  -2  -9   0    0.37    0.22 
   2  -9   0    0.53    0.26 
  -2  -9   0    0.17    0.18 
  -2  -9   0    0.33    0.21 
  -2   9   0    0.94    0.29 
   2   9   0    0.69    0.21 
   2   9   0    0.34    0.20 
  -2   9   0    0.07    0.18 
  -2   9   0    0.34    0.22 
   2   9   0    0.47    0.23 
  -3  -9   0    0.90    0.27 
  -3  -9   0    0.64    0.28 
  -3  -9   0    0.61    0.27 
   3  -9   0    0.27    0.21 
   3  -9   0    0.46    0.24 
   3  -9   0    0.56    0.25 
   3  -9   0    0.29    0.25 
   3  -9   0    0.46    0.25 
  -3  -9   0    0.52    0.25 
  -3  -9   0    0.35    0.24 
  -3   9   0    0.83    0.29 
  -3   9   0    0.42    0.24 
   3   9   0    0.54    0.24 
  -3   9   0    0.52    0.26 
  -3   9   0    0.69    0.29 
   3   9   0    0.52    0.18 
   3   9   0    0.56    0.24 
  -4  -9   0    1.34    0.32 
   4  -9   0    0.93    0.29 
   4  -9   0    0.97    0.36 
  -4  -9   0    1.41    0.35 
  -4  -9   0    1.32    0.33 
  -4  -9   0    0.83    0.29 
   4  -9   0    0.85    0.29 
  -4  -9   0    1.38    0.36 
   4  -9   0    1.07    0.33 
   4  -9   0    1.02    0.27 
  -4   9   0    1.40    0.33 
   4   9   0    1.23    0.32 
  -4   9   0    1.34    0.35 
  -4   9   0    1.37    0.37 
  -4   9   0    1.06    0.31 
   4   9   0    0.67    0.23 
   5  -9   0    0.01    0.20 
   5  -9   0    0.27    0.21 
   5  -9   0   -0.15    0.17 
  -5  -9   0    0.28    0.21 
  -5  -9   0    0.04    0.18 
   5  -9   0   -0.04    0.15 
  -5  -9   0    0.31    0.19 
  -5  -9   0   -0.13    0.15 
  -5  -9   0   -0.18    0.14 
   5  -9   0   -0.14    0.20 
   5   9   0    0.13    0.17 
  -5   9   0    0.23    0.22 
  -5   9   0    0.23    0.22 
  -5   9   0    0.02    0.16 
   5   9   0    0.17    0.19 
  -5   9   0   -0.33    0.17 
   6  -9   0    0.58    0.22 
  -6  -9   0    0.68    0.27 
  -6  -9   0    0.83    0.28 
   6  -9   0    0.41    0.24 
  -6  -9   0    0.33    0.22 
   6  -9   0    0.91    0.28 
   6  -9   0    1.08    0.34 
  -6  -9   0    0.79    0.26 
  -6  -9   0    0.97    0.29 
  -6   9   0    0.84    0.28 
  -6   9   0    1.68    0.39 
  -6   9   0    0.43    0.27 
  -6   9   0    0.51    0.31 
   6   9   0    0.94    0.26 
  -7  -9   0   12.03    0.78 
  -7  -9   0   11.23    0.74 
  -7  -9   0   12.27    0.77 
   7  -9   0   11.49    0.71 
   7  -9   0   12.65    0.67 
   7  -9   0    9.82    0.79 
  -7  -9   0   12.13    0.75 
   7  -9   0   10.79    0.71 
  -7  -9   0   12.48    0.72 
  -7   9   0   11.44    0.75 
   7   9   0   11.83    0.67 
  -7   9   0   13.65    0.89 
  -7   9   0   11.94    0.84 
  -8  -9   0    3.98    0.50 
   8  -9   0    4.63    0.54 
   8  -9   0    4.77    0.66 
  -8  -9   0    4.80    0.58 
  -8  -9   0    6.14    0.62 
  -8  -9   0    5.84    0.64 
   8  -9   0    4.77    0.49 
   8  -9   0    5.53    0.60 
  -8  -9   0    5.28    0.61 
  -8   9   0    6.18    0.73 
  -8   9   0    5.37    0.67 
  -8   9   0    5.07    0.61 
   8   9   0    5.39    0.52 
  -9  -9   0   22.01    1.04 
  -9  -9   0   22.40    1.10 
   9  -9   0   22.71    1.03 
  -9  -9   0   22.96    1.04 
   9  -9   0   20.80    0.89 
   9  -9   0   23.12    1.23 
  -9  -9   0   21.35    1.00 
  -9  -9   0   21.86    1.07 
   9  -9   0   24.90    1.07 
   9   9   0   22.20    0.93 
  -9   9   0   20.68    1.16 
  -9   9   0   22.44    1.18 
  -9   9   0   24.25    1.16 
  10  -9   0   13.62    0.80 
  10  -9   0   14.71    1.00 
 -10  -9   0   15.57    0.88 
  10  -9   0   14.97    0.82 
 -10  -9   0   15.20    0.85 
 -10  -9   0   13.93    0.79 
  10  -9   0   14.50    0.71 
 -10  -9   0   14.41    0.81 
 -10  -9   0   13.76    0.87 
  10   9   0   14.10    0.73 
 -10   9   0   13.97    0.95 
 -10   9   0   15.74    0.94 
 -10   9   0   15.14    1.00 
  11  -9   0    8.21    0.87 
  11  -9   0    8.91    0.66 
  11  -9   0    8.34    0.63 
 -11  -9   0    8.65    0.62 
 -11  -9   0    9.56    0.72 
  11  -9   0   10.41    0.59 
 -11  -9   0    9.11    0.69 
 -11  -9   0   10.13    0.68 
 -11  -9   0    9.69    0.68 
 -11   9   0    9.91    0.93 
 -11   9   0   10.65    0.84 
  11   9   0    8.57    0.58 
 -11   9   0    9.78    0.95 
 -12  -9   0    4.11    0.53 
 -12  -9   0    3.20    0.53 
 -12  -9   0    5.03    0.63 
 -12  -9   0    3.87    0.47 
  12  -9   0    3.70    0.62 
 -12  -9   0    4.17    0.53 
  12  -9   0    4.73    0.57 
  12  -9   0    5.26    0.60 
 -12   9   0    4.56    0.69 
 -12   9   0    3.98    0.62 
 -12   9   0    4.03    0.64 
 -13  -9   0   13.70    0.87 
 -13  -9   0   15.39    0.93 
 -13  -9   0   12.84    0.73 
  13  -9   0   12.38    0.77 
 -13  -9   0   13.14    0.78 
 -13   9   0   13.88    0.98 
 -13   9   0   12.23    0.92 
 -13   9   0   14.86    1.01 
 -13   9   0   12.57    0.96 
 -14  -9   0    4.59    0.62 
 -14  -9   0    4.66    0.61 
 -14  -9   0    4.33    0.49 
  14  -9   0    4.56    0.57 
 -14  -9   0    6.13    0.71 
 -14  -9   0    5.72    0.63 
 -14   9   0    5.81    0.79 
 -14   9   0    4.04    0.64 
 -14   9   0    3.59    0.61 
 -14   9   0    3.77    0.62 
 -15  -9   0    9.82    0.75 
 -15  -9   0   10.02    0.63 
 -15  -9   0   11.30    0.84 
  15  -9   0    9.87    0.69 
 -15  -9   0    9.67    0.78 
 -15  -9   0   11.81    0.74 
 -15   9   0   11.44    1.10 
 -15   9   0   11.08    0.91 
 -15   9   0   11.28    0.94 
 -15   9   0   10.46    1.01 
 -16  -9   0    5.13    0.59 
 -16  -9   0    5.16    0.69 
 -16  -9   0    5.04    0.50 
  16  -9   0    5.66    0.65 
 -16  -9   0    4.16    0.61 
 -16   9   0    4.59    0.74 
 -16   9   0    6.66    0.84 
 -16   9   0    5.93    0.83 
 -16   9   0    5.41    0.78 
 -17  -9   0   16.51    1.02 
 -17  -9   0   17.04    0.76 
  17  -9   0   16.11    0.91 
 -17  -9   0   17.88    1.12 
 -17   9   0   15.68    1.16 
 -17   9   0   17.83    1.19 
 -17   9   0   17.52    1.19 
 -18  -9   0    1.63    0.48 
 -18  -9   0    1.72    0.27 
 -18   9   0    1.24    0.46 
 -18   9   0    1.69    0.52 
 -18   9   0    1.44    0.49 
 -19  -9   0    6.77    0.86 
 -19  -9   0    7.63    0.39 
 -19   9   0    7.20    0.94 
 -19   9   0    7.57    0.96 
 -19   9   0    7.32    0.90 
 -20  -9   0    6.54    0.88 
 -20   9   0    7.19    0.95 
 -20   9   0    4.48    0.83 
 -21  -9   0   11.95    1.19 
 -21   9   0   16.43    1.23 
 -21   9   0   15.35    1.18 
 -21   9   0   13.19    1.35 
 -22  -9   0    6.12    0.88 
 -22   9   0    5.20    0.82 
 -22   9   0    5.56    0.87 
 -22   9   0    4.87    0.86 
   0 -10   0    0.76    0.31 
   0 -10   0    1.01    0.31 
   0 -10   0    1.37    0.38 
   0 -10   0    1.41    0.34 
   0 -10   0    1.09    0.31 
   0  10   0    0.59    0.25 
   0  10   0    0.97    0.33 
   0  10   0    0.97    0.32 
   1 -10   0  166.54    4.12 
  -1 -10   0  164.38    4.29 
   1 -10   0  160.68    4.31 
   1 -10   0  166.12    4.09 
   1 -10   0  168.68    4.22 
  -1 -10   0  163.17    4.11 
  -1 -10   0  163.67    4.20 
  -1 -10   0  167.70    4.35 
   1 -10   0  166.71    4.38 
  -1 -10   0  161.63    4.10 
   1  10   0  169.08    4.14 
  -1  10   0  163.44    3.93 
   1  10   0  161.48    4.21 
  -1  10   0  167.43    4.17 
  -1  10   0  165.05    4.27 
   2 -10   0    5.42    0.70 
  -2 -10   0    4.07    0.61 
  -2 -10   0    4.10    0.56 
   2 -10   0    4.19    0.54 
  -2 -10   0    5.48    0.62 
   2 -10   0    4.58    0.54 
  -2 -10   0    4.97    0.67 
   2 -10   0    4.02    0.60 
  -2 -10   0    5.39    0.62 
   2 -10   0    3.84    0.54 
   2  10   0    3.98    0.51 
  -2  10   0    4.12    0.54 
   2  10   0    4.92    0.61 
  -2  10   0    4.52    0.60 
  -2  10   0    4.26    0.51 
   3 -10   0   56.35    2.05 
  -3 -10   0   56.86    1.94 
   3 -10   0   57.70    1.93 
  -3 -10   0   57.42    1.87 
   3 -10   0   57.08    1.87 
  -3 -10   0   57.48    2.01 
  -3 -10   0   55.21    1.87 
   3 -10   0   56.04    1.81 
  -3 -10   0   54.62    1.95 
   3 -10   0   57.66    2.09 
  -3  10   0   56.08    1.78 
   3  10   0   58.54    1.85 
  -3  10   0   58.60    2.03 
   3  10   0   56.31    1.91 
  -3  10   0   56.53    1.94 
  -4 -10   0    5.94    0.67 
  -4 -10   0    5.03    0.62 
   4 -10   0    5.01    0.59 
  -4 -10   0    6.48    0.71 
  -4 -10   0    6.32    0.66 
   4 -10   0    6.99    0.79 
   4 -10   0    5.91    0.59 
   4 -10   0    6.37    0.78 
   4 -10   0    5.62    0.64 
  -4 -10   0    6.08    0.67 
   4  10   0    5.66    0.63 
  -4  10   0    5.47    0.67 
  -4  10   0    4.44    0.60 
  -4  10   0    5.49    0.59 
   4  10   0    6.20    0.62 
   5 -10   0   65.04    2.05 
  -5 -10   0   63.47    2.08 
   5 -10   0   63.97    1.95 
  -5 -10   0   62.99    2.13 
  -5 -10   0   64.94    2.13 
  -5 -10   0   65.77    2.05 
  -5 -10   0   62.81    2.11 
   5 -10   0   62.42    2.25 
   5 -10   0   64.14    2.08 
   5  10   0   62.50    1.95 
  -5  10   0   65.96    2.18 
  -5  10   0   63.63    2.01 
  -5  10   0   64.58    2.22 
   6 -10   0    0.79    0.32 
  -6 -10   0   -0.06    0.19 
  -6 -10   0    0.64    0.29 
   6 -10   0    0.42    0.27 
   6 -10   0    0.42    0.25 
  -6 -10   0    0.01    0.21 
   6 -10   0    0.57    0.33 
  -6 -10   0    0.30    0.24 
  -6 -10   0    0.39    0.24 
  -6  10   0    0.37    0.28 
  -6  10   0    0.22    0.25 
   6  10   0    0.08    0.20 
  -6  10   0    0.48    0.26 
  -6  10   0    0.05    0.24 
  -7 -10   0   70.04    2.29 
   7 -10   0   67.35    2.20 
   7 -10   0   69.16    2.46 
  -7 -10   0   73.57    2.21 
   7 -10   0   73.13    2.23 
  -7 -10   0   71.64    2.26 
  -7 -10   0   71.16    2.29 
   7 -10   0   74.14    2.10 
   7  10   0   70.98    2.10 
  -7  10   0   73.67    2.27 
  -7  10   0   69.49    2.43 
  -7  10   0   70.53    2.41 
  -8 -10   0    0.99    0.33 
  -8 -10   0    1.94    0.44 
   8 -10   0    0.95    0.31 
  -8 -10   0    1.35    0.35 
   8 -10   0    1.78    0.46 
  -8 -10   0    1.31    0.35 
   8 -10   0    1.41    0.35 
   8 -10   0    1.93    0.35 
  -8  10   0    1.24    0.37 
   8  10   0    1.38    0.33 
  -8  10   0    1.03    0.37 
  -8  10   0    1.65    0.44 
  -9 -10   0   24.19    1.15 
   9 -10   0   24.90    1.04 
  -9 -10   0   27.36    1.23 
  -9 -10   0   25.89    1.16 
  -9 -10   0   24.11    1.21 
   9 -10   0   24.41    1.15 
   9 -10   0   23.27    1.33 
   9 -10   0   27.53    1.20 
  -9  10   0   26.10    1.24 
   9  10   0   26.57    1.08 
  -9  10   0   25.31    1.35 
  -9  10   0   24.22    1.30 
 -10 -10   0    9.23    0.69 
 -10 -10   0    8.66    0.83 
  10 -10   0    9.01    0.68 
 -10 -10   0    8.95    0.66 
  10 -10   0    9.65    0.71 
  10 -10   0   11.18    1.11 
  10 -10   0    8.09    0.58 
 -10 -10   0    8.66    0.69 
 -10  10   0    9.31    0.75 
  10  10   0    9.04    0.62 
 -10  10   0    6.89    0.83 
 -10  10   0    9.05    0.97 
  11 -10   0   22.68    1.33 
 -11 -10   0   24.65    1.20 
 -11 -10   0   23.12    1.10 
  11 -10   0   23.34    1.11 
  11 -10   0   23.38    1.12 
 -11 -10   0   21.14    1.09 
 -11 -10   0   22.19    1.18 
 -11 -10   0   22.65    1.09 
 -11  10   0   20.73    1.25 
 -11  10   0   23.31    1.32 
 -11  10   0   25.81    1.30 
  12 -10   0    0.50    0.28 
 -12 -10   0    0.29    0.26 
  12 -10   0    0.14    0.31 
 -12 -10   0    0.07    0.21 
 -12 -10   0    0.07    0.23 
 -12 -10   0    0.15    0.25 
 -12 -10   0    0.08    0.20 
  12 -10   0   -0.07    0.23 
 -12  10   0    0.03    0.25 
 -12  10   0    0.43    0.32 
 -12  10   0   -0.04    0.25 
 -13 -10   0   26.60    1.31 
 -13 -10   0   25.36    1.20 
 -13 -10   0   27.78    1.34 
  13 -10   0   27.05    1.23 
 -13 -10   0   26.43    1.17 
 -13  10   0   30.32    1.55 
 -13  10   0   28.07    1.48 
 -13  10   0   27.20    1.40 
  14 -10   0   -0.11    0.20 
 -14 -10   0   -0.11    0.19 
 -14 -10   0   -0.15    0.20 
 -14 -10   0   -0.19    0.17 
 -14 -10   0   -0.02    0.24 
 -14  10   0    0.22    0.31 
 -14  10   0   -0.01    0.26 
 -14  10   0    0.13    0.32 
 -14  10   0   -0.08    0.25 
 -15 -10   0   12.41    0.91 
 -15 -10   0   12.25    0.75 
 -15 -10   0   12.94    0.83 
  15 -10   0   11.62    0.81 
 -15 -10   0   12.74    0.90 
 -15  10   0   13.21    1.06 
 -15  10   0   12.20    1.02 
 -15  10   0   13.84    1.04 
 -15  10   0   12.84    1.00 
 -16 -10   0   -0.31    0.20 
 -16 -10   0   -0.14    0.17 
 -16 -10   0    0.25    0.26 
  16 -10   0    0.17    0.26 
 -16  10   0    0.24    0.36 
 -16  10   0    0.03    0.34 
 -16  10   0   -0.13    0.25 
 -16  10   0    0.12    0.30 
 -17 -10   0   12.53    0.91 
  17 -10   0   10.76    0.79 
 -17 -10   0   10.10    0.64 
 -17  10   0   10.66    1.15 
 -17  10   0   11.55    1.19 
 -17  10   0   12.96    1.25 
 -18 -10   0    0.23    0.19 
 -18  10   0    0.12    0.33 
 -18  10   0    0.11    0.32 
 -18  10   0    0.31    0.36 
 -19 -10   0    4.93    0.39 
 -19  10   0    3.19    0.70 
 -19  10   0    5.15    0.83 
 -19  10   0    5.41    0.86 
 -20  10   0    0.04    0.38 
 -20  10   0   -0.11    0.32 
 -20  10   0   -0.02    0.32 
 -21  10   0    6.35    1.02 
 -21  10   0    7.76    1.00 
   0 -11   0    0.07    0.26 
   0 -11   0   -0.07    0.20 
   0 -11   0    0.16    0.25 
   0 -11   0    0.26    0.26 
   0 -11   0    0.41    0.26 
   0  11   0    0.25    0.21 
   0  11   0    0.29    0.26 
   1 -11   0    3.00    0.58 
   1 -11   0    2.45    0.50 
  -1 -11   0    3.01    0.57 
  -1 -11   0    3.56    0.60 
  -1 -11   0    2.66    0.47 
   1 -11   0    3.27    0.58 
  -1 -11   0    2.48    0.49 
  -1 -11   0    2.94    0.50 
   1 -11   0    2.41    0.45 
   1 -11   0    2.88    0.48 
   1  11   0    3.00    0.52 
  -1  11   0    2.70    0.50 
  -1  11   0    3.07    0.53 
   1  11   0    2.28    0.44 
   2 -11   0    0.63    0.34 
   2 -11   0    0.40    0.31 
  -2 -11   0    0.67    0.32 
   2 -11   0    0.14    0.26 
  -2 -11   0    0.66    0.29 
  -2 -11   0    0.50    0.25 
  -2 -11   0    0.33    0.26 
   2 -11   0    0.47    0.26 
   2 -11   0    0.52    0.28 
  -2 -11   0    0.26    0.27 
  -2  11   0    0.82    0.32 
  -2  11   0    0.29    0.26 
   2  11   0    0.33    0.26 
   2  11   0    0.18    0.24 
  -3 -11   0    0.91    0.34 
   3 -11   0    1.82    0.48 
  -3 -11   0    1.96    0.42 
   3 -11   0    1.73    0.39 
   3 -11   0    1.76    0.46 
  -3 -11   0    2.02    0.43 
  -3 -11   0    2.18    0.45 
  -3 -11   0    1.18    0.40 
   3 -11   0    1.31    0.36 
   3 -11   0    1.63    0.41 
  -3  11   0    1.93    0.38 
  -3  11   0    1.42    0.42 
  -3  11   0    2.16    0.46 
   3  11   0    1.60    0.37 
   4 -11   0    0.92    0.32 
  -4 -11   0    0.52    0.30 
   4 -11   0    0.72    0.27 
   4 -11   0    0.70    0.31 
  -4 -11   0    0.29    0.26 
   4 -11   0    0.01    0.25 
  -4 -11   0    0.58    0.29 
  -4 -11   0    0.98    0.37 
  -4 -11   0    0.49    0.28 
   4  11   0    0.19    0.24 
  -4  11   0    0.20    0.22 
  -4  11   0    0.45    0.29 
  -4  11   0    0.94    0.34 
  -5 -11   0    0.17    0.26 
   5 -11   0    0.30    0.26 
  -5 -11   0    0.49    0.29 
   5 -11   0   -0.43    0.21 
   5 -11   0    0.67    0.26 
  -5 -11   0    0.49    0.27 
  -5 -11   0    0.60    0.29 
  -5 -11   0    0.19    0.23 
   5 -11   0    0.21    0.23 
  -5  11   0    0.25    0.25 
  -5  11   0    0.10    0.25 
  -5  11   0    0.46    0.34 
   5  11   0    0.19    0.23 
   6 -11   0    1.45    0.44 
  -6 -11   0    1.47    0.40 
   6 -11   0    2.59    0.46 
   6 -11   0    2.95    0.47 
  -6 -11   0    1.86    0.43 
   6 -11   0    1.57    0.39 
  -6 -11   0    1.48    0.37 
  -6 -11   0    1.76    0.42 
   6  11   0    2.87    0.47 
  -6  11   0    1.85    0.48 
  -6  11   0    1.37    0.37 
  -7 -11   0    0.75    0.29 
  -7 -11   0    0.55    0.30 
  -7 -11   0    0.25    0.26 
  -7 -11   0    0.80    0.32 
   7 -11   0    0.49    0.37 
   7 -11   0    0.73    0.31 
   7 -11   0    0.18    0.23 
   7 -11   0    0.54    0.30 
  -7  11   0    0.58    0.31 
  -7  11   0    0.77    0.38 
   7  11   0    0.87    0.29 
  -8 -11   0    1.00    0.37 
  -8 -11   0    0.63    0.30 
  -8 -11   0    1.00    0.33 
   8 -11   0    1.13    0.34 
   8 -11   0    0.82    0.39 
  -8 -11   0    1.25    0.39 
   8 -11   0    1.55    0.39 
   8 -11   0    1.08    0.33 
  -8  11   0    0.87    0.34 
  -8  11   0    0.92    0.40 
   8  11   0    0.76    0.29 
  -9 -11   0    6.17    0.71 
   9 -11   0    6.86    0.73 
   9 -11   0    7.36    0.70 
   9 -11   0    5.78    0.70 
  -9 -11   0    7.63    0.78 
  -9 -11   0    7.03    0.80 
   9 -11   0    7.09    0.90 
  -9 -11   0    6.55    0.75 
   9  11   0    5.89    0.62 
  -9  11   0    7.79    0.83 
  -9  11   0    4.91    0.73 
 -10 -11   0    0.58    0.29 
  10 -11   0    0.28    0.26 
  10 -11   0    0.11    0.23 
  10 -11   0    0.24    0.25 
 -10 -11   0    0.31    0.25 
 -10 -11   0    0.42    0.26 
  10 -11   0   -0.23    0.25 
 -10 -11   0    1.12    0.37 
 -10  11   0    0.65    0.37 
 -10  11   0    0.09    0.25 
 -10  11   0    0.01    0.28 
  11 -11   0    8.99    0.84 
  11 -11   0    7.35    0.79 
 -11 -11   0    8.66    0.83 
  11 -11   0    9.06    1.07 
 -11 -11   0    7.45    0.76 
 -11 -11   0    8.02    0.88 
 -11 -11   0    6.63    0.74 
 -11  11   0    8.92    1.02 
 -11  11   0    7.79    0.88 
 -11  11   0    8.12    1.00 
 -12 -11   0    0.76    0.30 
  12 -11   0    1.32    0.41 
  12 -11   0    2.05    0.57 
 -12 -11   0    1.81    0.43 
 -12 -11   0    2.18    0.46 
  12 -11   0    1.53    0.41 
 -12 -11   0    1.73    0.45 
 -12  11   0    1.04    0.43 
 -12  11   0    1.70    0.46 
 -12  11   0    2.09    0.57 
 -13 -11   0    4.03    0.64 
 -13 -11   0    2.73    0.46 
 -13 -11   0    3.16    0.54 
  13 -11   0    4.41    0.61 
 -13  11   0    3.90    0.72 
 -13  11   0    3.40    0.64 
 -13  11   0    3.12    0.63 
 -14 -11   0    6.25    0.72 
 -14 -11   0    5.87    0.75 
  14 -11   0    4.65    0.65 
 -14 -11   0    4.90    0.60 
 -14  11   0    6.30    0.89 
 -14  11   0    4.87    0.81 
 -14  11   0    5.07    0.80 
 -14  11   0    6.37    0.86 
 -15 -11   0    8.29    0.82 
 -15 -11   0   10.50    0.74 
  15 -11   0   10.02    0.79 
 -15 -11   0    8.48    0.91 
 -15  11   0    8.51    1.01 
 -15  11   0    9.48    1.03 
 -15  11   0    8.72    1.04 
 -15  11   0    8.11    1.00 
 -16 -11   0    6.69    0.67 
  16 -11   0    5.74    0.70 
 -16  11   0    5.24    0.84 
 -16  11   0    6.91    0.91 
 -16  11   0    7.13    0.94 
 -16  11   0    7.08    0.96 
 -17 -11   0    6.88    0.57 
  17 -11   0    5.42    0.70 
 -17  11   0    5.21    0.83 
 -17  11   0    6.66    0.94 
 -17  11   0    5.92    0.93 
 -18 -11   0    2.08    0.37 
 -18  11   0    2.02    0.58 
 -18  11   0    2.21    0.61 
 -18  11   0    2.48    0.66 
 -19 -11   0    2.84    0.38 
 -19  11   0    2.20    0.63 
 -19  11   0    2.12    0.59 
 -20 -11   0    8.47    0.45 
 -20  11   0    7.47    1.05 
 -20  11   0    7.98    1.06 
   0 -12   0   26.45    1.41 
   0 -12   0   26.33    1.28 
   0 -12   0   24.17    1.31 
   0 -12   0   24.61    1.39 
   0 -12   0   24.67    1.23 
   0  12   0   27.05    1.30 
   0  12   0   28.64    1.41 
   1 -12   0    4.46    0.70 
   1 -12   0    3.22    0.53 
  -1 -12   0    3.34    0.61 
  -1 -12   0    2.88    0.56 
  -1 -12   0    3.82    0.57 
   1 -12   0    3.57    0.66 
   1 -12   0    3.24    0.59 
   1 -12   0    4.45    0.62 
  -1 -12   0    3.01    0.53 
  -1 -12   0    4.08    0.65 
  -1  12   0    4.61    0.64 
   1  12   0    3.30    0.52 
  -1  12   0    3.88    0.66 
   1  12   0    4.15    0.64 
   2 -12   0   11.89    0.86 
  -2 -12   0   11.40    0.93 
  -2 -12   0   12.37    0.86 
  -2 -12   0   11.09    0.87 
   2 -12   0   10.00    1.02 
   2 -12   0   12.62    0.99 
   2 -12   0   12.50    0.85 
  -2 -12   0   11.86    0.93 
  -2 -12   0   11.31    0.83 
   2 -12   0   11.21    0.86 
  -2  12   0   13.57    0.99 
   2  12   0   12.52    0.84 
  -2  12   0    9.84    0.95 
   3 -12   0   11.83    0.83 
   3 -12   0   12.61    0.86 
  -3 -12   0   10.99    0.82 
   3 -12   0   11.28    0.87 
   3 -12   0   13.30    1.04 
  -3 -12   0   12.19    0.88 
  -3 -12   0   11.32    0.88 
  -3 -12   0   12.24    0.95 
  -3 -12   0   12.56    0.95 
  -3  12   0   13.64    1.00 
  -3  12   0   11.30    1.05 
   3  12   0   12.74    0.85 
   4 -12   0    3.49    0.56 
  -4 -12   0    4.00    0.61 
  -4 -12   0    4.76    0.71 
   4 -12   0    4.12    0.63 
  -4 -12   0    4.82    0.65 
  -4 -12   0    5.05    0.75 
  -4 -12   0    4.77    0.70 
   4 -12   0    4.03    0.71 
   4 -12   0    4.63    0.62 
  -4  12   0    2.89    0.56 
   4  12   0    3.23    0.54 
  -4  12   0    3.58    0.59 
  -5 -12   0    1.50    0.39 
  -5 -12   0    1.35    0.42 
   5 -12   0    1.69    0.48 
   5 -12   0    0.85    0.33 
  -5 -12   0    1.14    0.38 
  -5 -12   0    1.61    0.43 
   5 -12   0    0.93    0.36 
   5 -12   0    0.99    0.32 
  -5  12   0    1.11    0.42 
   5  12   0    0.92    0.30 
  -6 -12   0   10.82    0.86 
   6 -12   0    9.91    1.11 
   6 -12   0    8.12    0.82 
  -6 -12   0   11.17    0.82 
   6 -12   0   11.05    0.85 
   6 -12   0    9.25    0.86 
  -6 -12   0    9.12    0.96 
  -6 -12   0   10.35    1.00 
  -6  12   0    8.23    0.91 
   6  12   0   10.97    0.78 
   7 -12   0    1.37    0.48 
  -7 -12   0    1.09    0.38 
  -7 -12   0    1.07    0.38 
  -7 -12   0    1.95    0.47 
   7 -12   0    0.73    0.30 
  -7 -12   0    0.89    0.37 
   7 -12   0    1.30    0.36 
   7 -12   0    1.30    0.41 
  -7  12   0    0.96    0.41 
   7  12   0    1.96    0.42 
  -7  12   0    1.19    0.38 
  -8 -12   0    8.69    0.93 
  -8 -12   0    6.88    0.78 
   8 -12   0    6.09    0.75 
   8 -12   0    6.31    0.89 
  -8 -12   0    7.79    0.90 
  -8 -12   0    6.05    0.75 
   8 -12   0    8.08    0.85 
   8 -12   0    7.12    0.74 
  -8  12   0    9.77    0.78 
  -8  12   0    6.09    0.83 
   9 -12   0    3.02    0.54 
  -9 -12   0    4.01    0.61 
   9 -12   0    2.33    0.48 
  -9 -12   0    3.67    0.60 
   9 -12   0    2.52    0.46 
  -9 -12   0    3.37    0.56 
   9 -12   0    2.48    0.61 
  -9 -12   0    3.12    0.59 
  -9  12   0    3.60    0.61 
  -9  12   0    4.67    0.79 
 -10 -12   0    1.81    0.48 
  10 -12   0    1.94    0.55 
  10 -12   0    1.47    0.40 
 -10 -12   0    1.60    0.44 
 -10 -12   0    2.58    0.52 
 -10 -12   0    2.14    0.47 
  10 -12   0    1.94    0.45 
 -10  12   0    1.71    0.47 
 -10  12   0    1.94    0.53 
 -11 -12   0   -0.01    0.25 
 -11 -12   0    0.15    0.24 
 -11 -12   0    0.03    0.24 
 -11 -12   0   -0.42    0.22 
  11 -12   0   -0.03    0.23 
  11 -12   0    0.09    0.27 
  11 -12   0   -0.04    0.30 
 -11  12   0   -0.17    0.27 
 -11  12   0   -0.09    0.28 
  12 -12   0    5.88    0.74 
 -12 -12   0    5.33    0.67 
 -12 -12   0    6.10    0.78 
 -12 -12   0    6.14    0.82 
  12 -12   0    5.06    0.68 
 -12  12   0    6.38    0.84 
 -12  12   0    5.66    0.87 
 -13 -12   0    1.46    0.40 
 -13 -12   0    0.68    0.40 
  13 -12   0    0.85    0.39 
 -13 -12   0    1.10    0.39 
 -13  12   0    1.24    0.44 
 -13  12   0    0.38    0.40 
 -14 -12   0   10.78    0.87 
 -14 -12   0    9.98    1.05 
  14 -12   0    9.68    0.96 
 -14 -12   0    9.77    0.78 
 -14  12   0    6.92    0.99 
 -14  12   0    8.62    1.07 
 -14  12   0    9.15    1.10 
 -14  12   0   10.62    1.13 
  15 -12   0    1.25    0.40 
 -15 -12   0    2.29    0.52 
 -15 -12   0    1.84    0.43 
 -15 -12   0    2.02    0.54 
 -15  12   0    1.63    0.55 
 -15  12   0    2.64    0.63 
 -15  12   0    2.44    0.67 
 -15  12   0    2.29    0.66 
  16 -12   0    2.11    0.49 
 -16 -12   0    2.94    0.47 
 -16  12   0    2.40    0.62 
 -16  12   0    3.35    0.75 
 -16  12   0    3.55    0.71 
 -16  12   0    2.96    0.81 
  17 -12   0   -0.12    0.29 
 -17 -12   0    0.11    0.24 
 -17  12   0    0.29    0.39 
 -17  12   0    0.15    0.38 
 -18 -12   0    1.96    0.38 
 -18  12   0    1.39    0.54 
 -18  12   0    2.32    0.66 
   0 -13   0    0.00    0.30 
   0 -13   0    0.06    0.30 
   0 -13   0    0.12    0.30 
   0 -13   0   -0.01    0.26 
   0 -13   0   -0.06    0.24 
   0  13   0    0.19    0.25 
   1 -13   0   -0.21    0.23 
   1 -13   0    0.68    0.34 
   1 -13   0    0.24    0.34 
  -1 -13   0    0.48    0.30 
   1 -13   0    0.23    0.34 
  -1 -13   0    0.49    0.33 
   1 -13   0    0.47    0.38 
  -1 -13   0    0.31    0.35 
  -1 -13   0    0.40    0.31 
  -1 -13   0   -0.24    0.26 
  -1  13   0    0.00    0.27 
  -1  13   0   -0.09    0.28 
   1  13   0    0.11    0.27 
  -2 -13   0    2.81    0.56 
   2 -13   0    4.33    0.64 
   2 -13   0    4.60    0.68 
  -2 -13   0    3.01    0.56 
  -2 -13   0    2.80    0.56 
  -2 -13   0    3.14    0.65 
   2 -13   0    3.21    0.61 
  -2 -13   0    3.97    0.70 
   2 -13   0    3.54    0.70 
  -2  13   0    3.87    0.69 
   2  13   0    3.11    0.56 
  -2  13   0    3.81    0.64 
   3 -13   0    4.62    0.77 
  -3 -13   0    3.33    0.58 
  -3 -13   0    4.47    0.75 
   3 -13   0    3.76    0.66 
   3 -13   0    4.32    0.63 
   3 -13   0    3.35    0.58 
  -3 -13   0    3.55    0.66 
  -3 -13   0    4.49    0.66 
  -3 -13   0    2.96    0.60 
   3  13   0    2.82    0.52 
  -3  13   0    3.62    0.63 
  -3  13   0    3.51    0.67 
  -4 -13   0    0.09    0.25 
  -4 -13   0   -0.06    0.26 
   4 -13   0   -0.16    0.26 
  -4 -13   0    0.05    0.23 
   4 -13   0   -0.11    0.25 
   4 -13   0    0.18    0.26 
  -4 -13   0    0.11    0.31 
   4 -13   0    0.03    0.27 
  -4  13   0   -0.10    0.28 
  -4  13   0    0.37    0.30 
   4  13   0    0.18    0.27 
  -5 -13   0    4.37    0.73 
  -5 -13   0    3.43    0.59 
  -5 -13   0    4.87    0.76 
   5 -13   0    5.78    0.90 
   5 -13   0    3.51    0.58 
   5 -13   0    3.53    0.63 
  -5 -13   0    4.12    0.67 
   5 -13   0    5.56    0.74 
  -5  13   0    5.31    0.83 
   5  13   0    3.99    0.59 
  -6 -13   0   -0.07    0.31 
  -6 -13   0   -0.13    0.25 
   6 -13   0   -0.13    0.30 
   6 -13   0   -0.23    0.24 
   6 -13   0    0.32    0.25 
   6 -13   0    0.02    0.26 
  -6 -13   0    0.07    0.27 
  -6 -13   0   -0.07    0.26 
  -6  13   0   -0.07    0.25 
   6  13   0    0.19    0.27 
  -7 -13   0    3.75    0.63 
   7 -13   0    4.96    0.66 
   7 -13   0    4.28    0.79 
  -7 -13   0    4.83    0.74 
  -7 -13   0    4.70    0.73 
   7 -13   0    4.57    0.68 
  -7 -13   0    4.61    0.72 
   7 -13   0    5.33    0.76 
  -7  13   0    3.72    0.70 
   8 -13   0    4.23    0.81 
   8 -13   0    5.24    0.77 
  -8 -13   0    6.08    0.85 
  -8 -13   0    4.63    0.76 
  -8 -13   0    4.17    0.67 
   8 -13   0    6.47    0.75 
  -8 -13   0    4.62    0.70 
   8 -13   0    4.80    0.69 
  -8  13   0    5.16    0.81 
  -9 -13   0    4.65    0.74 
   9 -13   0    4.70    0.75 
  -9 -13   0    5.14    0.79 
   9 -13   0    3.50    0.80 
  -9 -13   0    4.32    0.72 
   9 -13   0    4.74    0.72 
   9 -13   0    4.84    0.65 
  -9 -13   0    5.85    0.77 
  -9  13   0    3.79    0.71 
 -10 -13   0    0.23    0.28 
  10 -13   0    0.13    0.27 
  10 -13   0    0.26    0.38 
 -10 -13   0   -0.14    0.28 
 -10 -13   0    0.49    0.37 
  10 -13   0    0.13    0.35 
 -10 -13   0    0.43    0.35 
 -10  13   0    0.32    0.40 
 -11 -13   0    2.80    0.60 
 -11 -13   0    3.61    0.63 
 -11 -13   0    3.25    0.67 
  11 -13   0    4.38    0.84 
  11 -13   0    4.02    0.68 
 -11 -13   0    3.88    0.69 
  11 -13   0    3.31    0.60 
 -11  13   0    2.29    0.64 
 -11  13   0    3.29    0.74 
 -12 -13   0    2.42    0.53 
  12 -13   0    2.36    0.53 
 -12 -13   0    2.86    0.65 
 -12 -13   0    2.36    0.55 
 -12  13   0    2.33    0.59 
 -12  13   0    2.64    0.70 
 -13 -13   0    5.77    0.84 
 -13 -13   0    5.61    0.75 
 -13 -13   0    5.23    0.78 
  13 -13   0    7.27    0.87 
 -13  13   0    6.89    0.99 
 -13  13   0    6.66    0.92 
 -14 -13   0    0.68    0.35 
  14 -13   0    0.76    0.36 
 -14 -13   0    0.37    0.38 
 -14 -13   0    0.40    0.35 
 -14  13   0    0.54    0.43 
 -14  13   0    0.80    0.49 
 -14  13   0    1.18    0.53 
 -15 -13   0    4.39    0.64 
  15 -13   0    5.37    0.75 
 -15 -13   0    4.90    0.76 
 -15  13   0    4.69    0.85 
 -15  13   0    5.04    0.86 
   0 -14   0    0.29    0.38 
   0 -14   0    0.53    0.40 
   0 -14   0    0.11    0.26 
   0 -14   0   -0.19    0.32 
   0 -14   0    0.19    0.34 
   0  14   0    0.59    0.37 
  -1 -14   0   34.36    1.73 
   1 -14   0   35.33    1.65 
   1 -14   0   32.96    1.61 
  -1 -14   0   35.19    1.83 
   1 -14   0   33.98    1.72 
   1 -14   0   32.87    1.83 
  -1 -14   0   32.96    1.61 
  -1 -14   0   33.96    1.84 
   1  14   0   32.69    1.62 
  -1  14   0   35.72    1.69 
   2 -14   0    0.29    0.34 
   2 -14   0    0.31    0.38 
  -2 -14   0    0.43    0.32 
  -2 -14   0    0.20    0.33 
   2 -14   0   -0.08    0.31 
  -2 -14   0   -0.04    0.32 
   2 -14   0    0.22    0.36 
  -2 -14   0    0.41    0.37 
  -2  14   0    0.11    0.32 
   2  14   0    0.31    0.27 
   3 -14   0   22.96    1.30 
  -3 -14   0   25.66    1.51 
  -3 -14   0   25.49    1.48 
   3 -14   0   24.26    1.41 
  -3 -14   0   21.01    1.28 
   3 -14   0   22.47    1.33 
  -3 -14   0   23.06    1.48 
   3 -14   0   21.95    1.50 
  -3  14   0   23.54    1.46 
   3  14   0   20.55    1.24 
   4 -14   0    1.71    0.56 
  -4 -14   0    2.02    0.50 
   4 -14   0    0.84    0.43 
  -4 -14   0    1.14    0.49 
  -4 -14   0    2.41    0.60 
   4 -14   0    1.12    0.41 
  -4 -14   0    0.58    0.39 
   4 -14   0    1.20    0.43 
  -4  14   0    1.88    0.55 
   4  14   0    1.26    0.45 
   5 -14   0   14.45    1.48 
  -5 -14   0   13.82    1.13 
   5 -14   0   14.51    1.05 
  -5 -14   0   14.19    1.17 
  -5 -14   0   15.49    1.16 
  -5 -14   0   17.33    1.14 
   5 -14   0   14.98    1.12 
   5 -14   0   13.94    1.00 
  -5  14   0   15.20    1.20 
   5  14   0   13.35    1.00 
  -6 -14   0    1.37    0.46 
  -6 -14   0    0.95    0.44 
   6 -14   0    2.07    0.62 
  -6 -14   0    0.81    0.43 
   6 -14   0    0.70    0.38 
   6 -14   0    1.47    0.47 
  -6 -14   0    1.12    0.51 
   6 -14   0    1.97    0.49 
  -6  14   0    1.15    0.49 
  -7 -14   0   13.97    1.12 
  -7 -14   0   12.49    0.98 
   7 -14   0   10.55    1.24 
  -7 -14   0   14.69    1.16 
  -7 -14   0   15.07    1.18 
   7 -14   0   10.15    1.10 
   7 -14   0   14.48    1.00 
   7 -14   0   13.78    1.05 
  -7  14   0   11.66    1.25 
  -8 -14   0    1.31    0.52 
   8 -14   0    1.40    0.43 
  -8 -14   0    1.29    0.49 
   8 -14   0    0.95    0.48 
   8 -14   0    0.32    0.35 
  -8 -14   0    0.19    0.33 
   8 -14   0    1.42    0.57 
  -8 -14   0    1.02    0.43 
  -8  14   0    1.66    0.56 
  -9 -14   0   23.01    1.43 
   9 -14   0   19.30    1.25 
  -9 -14   0   20.44    1.33 
   9 -14   0   20.49    1.50 
  -9 -14   0   17.91    1.30 
   9 -14   0   18.74    1.28 
  -9 -14   0   22.36    1.32 
  -9  14   0   19.78    1.45 
  10 -14   0    0.88    0.43 
  10 -14   0    0.61    0.47 
  10 -14   0    0.59    0.44 
 -10 -14   0    0.73    0.43 
 -10 -14   0    0.37    0.37 
 -10 -14   0    1.21    0.50 
 -10 -14   0    0.91    0.43 
 -10  14   0    0.53    0.45 
 -11 -14   0   14.02    1.35 
  11 -14   0   12.08    1.21 
  11 -14   0   15.35    1.12 
 -11 -14   0   15.68    1.18 
 -11 -14   0   14.36    1.10 
 -11  14   0   11.61    1.31 
 -12 -14   0    2.77    0.63 
 -12 -14   0    1.24    0.48 
 -12 -14   0    2.31    0.64 
  12 -14   0    1.17    0.50 
 -13 -14   0    6.99    0.98 
  13 -14   0    7.17    0.90 
   0 -15   0   -0.47    0.28 
   0 -15   0   -0.09    0.34 
   0 -15   0   -0.23    0.28 
   0  15   0    0.09    0.36 
   1 -15   0   -0.31    0.29 
  -1 -15   0   -0.03    0.38 
  -1 -15   0   -0.07    0.32 
   1 -15   0   -0.33    0.35 
  -1 -15   0    0.15    0.32 
   1 -15   0   -0.34    0.27 
  -1  15   0    0.04    0.39 
   1  15   0    0.66    0.41 
   2 -15   0    1.25    0.56 
  -2 -15   0    0.80    0.47 
   2 -15   0    0.99    0.47 
  -2 -15   0    0.30    0.46 
  -2 -15   0    0.35    0.37 
   2 -15   0    1.43    0.54 
  -2 -15   0    1.31    0.50 
   2  15   0    0.51    0.39 
   3 -15   0   -0.19    0.37 
  -3 -15   0    0.45    0.41 
   3 -15   0    0.66    0.51 
  -3 -15   0    0.39    0.45 
  -3 -15   0   -0.07    0.35 
   3 -15   0    0.30    0.34 
  -3 -15   0   -0.10    0.36 
   3  15   0    0.22    0.32 
   4 -15   0    1.91    0.57 
  -4 -15   0    1.22    0.48 
   4 -15   0    2.19    0.66 
  -4 -15   0    0.97    0.53 
  -4 -15   0    2.24    0.66 
  -4 -15   0    2.08    0.56 
   4 -15   0    1.29    0.48 
   5 -15   0    1.74    0.60 
  -5 -15   0    1.47    0.48 
  -5 -15   0    1.36    0.50 
   5 -15   0    1.78    0.52 
  -5 -15   0    2.95    0.79 
  -5 -15   0    1.82    0.59 
   5 -15   0    1.59    0.54 
  -5  15   0    1.93    0.61 
   6 -15   0    1.29    0.47 
  -6 -15   0    1.81    0.56 
  -6 -15   0    2.01    0.53 
  -6 -15   0    1.91    0.57 
   6 -15   0    2.62    0.63 
   6 -15   0    1.37    0.60 
  -6  15   0    1.42    0.59 
  -7 -15   0    2.71    0.67 
  -7 -15   0    1.91    0.59 
  -7 -15   0    1.92    0.55 
   7 -15   0    2.10    0.55 
   7 -15   0    2.99    0.65 
   7 -15   0    2.75    0.74 
  -7  15   0    2.17    0.62 
  -8 -15   0    0.04    0.34 
  -8 -15   0    0.78    0.47 
   8 -15   0   -0.08    0.34 
  -8 -15   0    0.82    0.43 
   8 -15   0   -0.08    0.34 
   8 -15   0    0.73    0.51 
  -8  15   0   -0.23    0.35 
  -9 -15   0    1.90    0.58 
   9 -15   0    2.80    0.66 
   9 -15   0    2.14    0.61 
  -9 -15   0    3.02    0.67 
   9 -15   0    2.13    0.69 
  -9 -15   0    2.29    0.65 
 -28   0   1   -0.27    0.31 
 -28   0   1    0.67    0.37 
 -27   0   1    8.32    1.13 
 -27   0   1    6.26    0.88 
 -26   0   1   -0.02    0.31 
 -26   0   1    0.16    0.31 
 -25   0   1   22.30    1.48 
 -25   0   1   21.44    1.29 
 -24   0   1    0.09    0.27 
 -24   0   1    0.13    0.33 
 -23   0   1   34.99    1.60 
 -23   0   1   36.51    1.82 
 -22   0   1    0.39    0.31 
 -22   0   1   -0.04    0.25 
 -22   0   1    0.30    0.10 
 -21   0   1   80.18    2.59 
  21   0  -1   86.93    2.50 
 -21   0   1   78.41    2.79 
 -21   0   1   80.26    1.85 
 -21   0   1   80.99    1.90 
 -20   0   1    0.28    0.16 
 -20   0   1    0.33    0.12 
  20   0  -1    0.45    0.23 
 -20   0   1    0.10    0.27 
 -20   0   1    0.11    0.12 
 -20   0   1    0.29    0.24 
 -19   0   1   34.92    1.57 
 -19   0   1   33.43    1.12 
 -19   0   1   33.40    0.93 
  19   0  -1   32.48    1.30 
 -19   0   1   31.50    0.96 
 -19   0   1   31.96    1.38 
 -18   0   1    0.20    0.11 
 -18   0   1    0.32    0.20 
 -18   0   1    0.34    0.13 
  18   0  -1    0.16    0.20 
 -18   0   1    0.34    0.17 
 -18   0   1    0.28    0.22 
 -18   0   1    0.19    0.24 
 -17   0   1   85.22    2.65 
 -17   0   1   86.70    2.50 
 -17   0   1   81.61    2.04 
 -17   0   1   85.48    2.01 
 -17   0   1   85.15    2.16 
 -17   0   1   87.36    2.37 
  17   0  -1   86.73    2.40 
 -16   0   1    0.11    0.11 
 -16   0   1    0.02    0.08 
 -16   0   1    0.12    0.12 
 -16   0   1    0.06    0.16 
  16   0  -1   -0.17    0.13 
 -16   0   1   -0.01    0.15 
 -16   0   1   -0.20    0.13 
  15   0  -1   35.30    1.23 
 -15   0   1   35.25    1.02 
 -15   0   1   35.08    1.07 
 -15   0   1   33.74    1.20 
 -15   0   1   33.42    1.28 
 -15   0   1   35.39    0.98 
 -15   0   1   36.13    1.42 
 -14   0   1   -0.02    0.15 
 -14   0   1    0.07    0.10 
 -14   0   1    0.26    0.15 
 -14   0   1    0.14    0.09 
 -14   0   1    0.02    0.07 
 -14   0   1    0.11    0.16 
  14   0  -1    0.05    0.14 
 -13   0   1  118.01    2.97 
 -13   0   1  117.66    2.63 
 -13   0   1  116.57    2.66 
 -13   0   1  118.26    3.09 
 -13   0   1  118.15    2.70 
  13   0  -1  115.85    2.88 
  13   0  -1  116.76    2.55 
 -13   0   1  120.50    2.88 
  12   0  -1   -0.01    0.07 
 -12   0   1    0.10    0.08 
 -12   0   1   -0.09    0.13 
 -12   0   1   -0.04    0.14 
 -12   0   1    0.17    0.11 
  12   0  -1    0.02    0.12 
 -12   0   1   -0.12    0.10 
 -12   0   1   -0.02    0.07 
  11   0  -1   15.20    0.65 
 -11   0   1   14.66    0.64 
 -11   0   1   15.00    0.54 
 -11   0   1   14.90    0.55 
 -11   0   1   16.63    0.76 
 -11   0   1   15.19    0.53 
  11   0  -1   15.74    0.46 
 -11   0   1   15.74    0.69 
 -10   0   1    0.04    0.11 
  10   0  -1   -0.07    0.08 
 -10   0   1   -0.05    0.09 
 -10   0   1    0.07    0.08 
 -10   0   1    0.02    0.06 
 -10   0   1   -0.01    0.06 
 -10   0   1    0.04    0.11 
  10   0  -1    0.00    0.05 
  -9   0   1  197.51    4.24 
  -9   0   1  196.17    4.23 
  -9   0   1  201.54    4.23 
  -9   0   1  203.31    4.39 
   9   0  -1  210.57    4.41 
  -9   0   1  203.10    4.52 
   9   0  -1  197.68    4.17 
  -9   0   1  199.79    4.43 
  -8   0   1    0.00    0.05 
  -8   0   1    0.03    0.06 
  -8   0   1    0.10    0.07 
   8   0  -1   -0.03    0.05 
  -8   0   1    0.07    0.09 
  -8   0   1    0.12    0.10 
  -8   0   1   -0.08    0.06 
   8   0  -1   -0.01    0.07 
  -7   0   1    2.63    0.25 
  -7   0   1    2.22    0.16 
   7   0  -1    2.02    0.22 
  -7   0   1    2.89    0.28 
  -7   0   1    2.30    0.16 
  -7   0   1    2.04    0.25 
  -7   0   1    2.18    0.16 
  -6   0   1   -0.13    0.07 
  -6   0   1    0.05    0.06 
  -6   0   1   -0.06    0.05 
  -6   0   1   -0.11    0.07 
  -6   0   1    0.03    0.09 
  -6   0   1    0.07    0.07 
   6   0  -1   -0.07    0.07 
  -5   0   1   14.91    0.52 
  -5   0   1   15.23    0.51 
  -5   0   1   15.00    0.49 
  -5   0   1   14.59    0.44 
  -5   0   1   14.54    0.44 
  -5   0   1   15.64    0.44 
  -4   0   1    0.05    0.07 
  -4   0   1   -0.02    0.05 
  -4   0   1    0.13    0.08 
  -4   0   1    0.06    0.06 
  -4   0   1    0.02    0.07 
  -4   0   1    0.10    0.06 
  -3   0   1    1.62    0.12 
  -3   0   1    1.65    0.11 
  -3   0   1    1.54    0.11 
  -3   0   1    1.43    0.10 
  -3   0   1    1.60    0.13 
   3   0  -1    1.67    0.12 
  -3   0   1    2.36    0.14 
  -2   0   1    0.04    0.02 
   2   0  -1    0.32    0.05 
  -2   0   1    0.02    0.02 
  -2   0   1    0.00    0.02 
  -2   0   1    0.11    0.03 
   0   0  -1   -0.63    0.01 
   0   0  -1   -0.64    0.01 
  -1   0  -1   19.46    0.42 
  -1   0  -1   18.37    0.46 
  -1   0  -1   19.26    0.42 
  -1   0  -1   19.57    0.44 
  -1   0  -1   19.75    0.42 
  -1   0  -1   19.58    0.42 
  -1   0  -1   16.25    0.42 
  -2   0  -1   -1.36    0.02 
  -2   0  -1   -1.36    0.03 
  -2   0  -1   -1.37    0.02 
   2   0   1   -1.35    0.02 
  -2   0  -1   -1.37    0.01 
  -2   0  -1   -1.37    0.02 
  -2   0  -1   -1.38    0.02 
  -3   0  -1   37.73    0.80 
  -3   0  -1   39.59    0.80 
  -3   0  -1   38.45    0.91 
  -3   0  -1   37.62    0.83 
  -3   0  -1   37.15    0.80 
  -3   0  -1   38.12    0.93 
  -3   0  -1   36.77    0.87 
  -3   0  -1   36.92    0.80 
  -3   0  -1   37.43    0.81 
  -4   0  -1   -0.34    0.03 
  -4   0  -1   -0.42    0.03 
  -4   0  -1   -0.44    0.03 
  -4   0  -1   -0.47    0.04 
  -4   0  -1   -0.36    0.06 
  -4   0  -1   -0.39    0.06 
  -4   0  -1   -0.39    0.03 
  -4   0  -1   -0.39    0.03 
  -4   0  -1   -0.38    0.04 
  -5   0  -1  300.76    6.02 
  -5   0  -1  303.70    6.07 
  -5   0  -1  300.06    6.13 
  -5   0  -1  298.10    6.06 
  -5   0  -1  297.98    6.24 
  -5   0  -1  299.16    6.13 
  -5   0  -1  306.53    6.09 
  -5   0  -1  295.30    6.27 
  -5   0  -1  304.01    6.09 
  -6   0  -1   -0.14    0.03 
  -6   0  -1   -0.15    0.05 
  -6   0  -1   -0.16    0.05 
  -6   0  -1   -0.15    0.08 
  -6   0  -1   -0.01    0.05 
  -6   0  -1   -0.15    0.04 
  -6   0  -1   -0.19    0.06 
  -6   0  -1   -0.13    0.04 
  -7   0  -1  110.89    2.58 
  -7   0  -1  105.88    2.27 
  -7   0  -1  105.96    2.38 
  -7   0  -1  109.84    2.35 
   7   0   1  112.78    2.38 
  -7   0  -1  107.53    2.30 
  -7   0  -1  107.70    2.52 
  -7   0  -1  107.67    2.29 
  -7   0  -1  106.29    2.28 
  -8   0  -1    0.16    0.06 
  -8   0  -1   -0.04    0.08 
  -8   0  -1   -0.03    0.07 
  -8   0  -1    0.04    0.05 
   8   0   1    0.00    0.07 
  -8   0  -1   -0.05    0.08 
  -8   0  -1    0.03    0.07 
  -8   0  -1    0.00    0.05 
  -8   0  -1    0.01    0.05 
  -9   0  -1   24.82    0.76 
   9   0   1   25.42    0.72 
  -9   0  -1   23.65    0.85 
  -9   0  -1   23.84    0.62 
  -9   0  -1   24.20    0.64 
  -9   0  -1   24.01    0.65 
  -9   0  -1   24.24    0.67 
  -9   0  -1   24.19    0.91 
 -10   0  -1   -0.02    0.06 
 -10   0  -1   -0.06    0.11 
 -10   0  -1    0.00    0.09 
 -10   0  -1    0.09    0.06 
 -10   0  -1   -0.09    0.09 
  10   0   1    0.01    0.08 
 -10   0  -1    0.01    0.06 
 -11   0  -1    3.91    0.45 
 -11   0  -1    4.34    0.21 
 -11   0  -1    4.31    0.23 
  11   0   1    4.71    0.34 
 -11   0  -1    3.71    0.41 
 -11   0  -1    5.02    0.33 
  11   0   1    4.60    0.28 
 -11   0  -1    4.63    0.25 
 -11   0  -1    4.32    0.26 
 -12   0  -1    0.08    0.07 
 -12   0  -1    0.09    0.12 
 -12   0  -1    0.00    0.05 
 -12   0  -1    0.08    0.09 
 -12   0  -1    0.18    0.10 
 -12   0  -1    0.06    0.16 
 -12   0  -1    0.23    0.15 
  12   0   1   -0.05    0.08 
  12   0   1   -0.04    0.10 
 -13   0  -1   25.98    0.74 
 -13   0  -1   26.43    0.92 
  13   0   1   25.79    0.95 
 -13   0  -1   25.29    1.12 
 -13   0  -1   30.06    1.11 
 -13   0  -1   27.69    0.73 
  13   0   1   27.57    0.83 
 -13   0  -1   28.40    0.82 
 -14   0  -1    0.12    0.19 
  14   0   1    0.04    0.12 
 -14   0  -1   -0.07    0.14 
 -14   0  -1    0.09    0.08 
 -14   0  -1    0.12    0.08 
 -14   0  -1    0.10    0.09 
  14   0   1    0.06    0.16 
 -14   0  -1    0.00    0.11 
 -15   0  -1   58.74    1.42 
 -15   0  -1   62.14    1.71 
 -15   0  -1   59.37    2.01 
 -15   0  -1   58.26    1.54 
  15   0   1   61.44    1.76 
 -15   0  -1   61.29    1.91 
 -15   0  -1   62.04    1.40 
 -16   0  -1    0.06    0.23 
 -16   0  -1    0.03    0.11 
 -16   0  -1    0.09    0.08 
 -16   0  -1    0.19    0.09 
 -16   0  -1   -0.04    0.16 
 -16   0  -1    0.19    0.15 
  16   0   1    0.15    0.17 
 -17   0  -1   51.01    1.18 
  17   0   1   53.36    1.65 
 -17   0  -1   48.04    1.73 
 -17   0  -1   48.63    1.38 
 -17   0  -1   50.30    1.20 
 -17   0  -1   50.08    1.90 
 -18   0  -1   -0.15    0.20 
  18   0   1    0.22    0.20 
 -18   0  -1    0.08    0.07 
 -18   0  -1    0.02    0.12 
 -18   0  -1   -0.11    0.21 
 -19   0  -1   20.26    1.08 
  19   0   1   20.67    0.98 
 -19   0  -1   20.19    1.20 
 -20   0  -1    0.39    0.32 
 -20   0  -1   -0.02    0.22 
 -21   0  -1   64.81    2.23 
 -21   0  -1   58.56    2.35 
 -22   0  -1   -0.14    0.27 
 -22   0  -1    0.33    0.28 
 -23   0  -1   48.02    1.96 
 -23   0  -1   49.47    2.17 
 -24   0  -1    0.64    0.39 
 -24   0  -1    0.31    0.35 
 -25   0  -1   35.79    1.70 
 -26   0  -1   -0.08    0.35 
 -26   0  -1   -0.03    0.36 
 -27   0  -1   17.68    1.39 
 -27   0  -1   17.68    1.25 
 -28  -1   1   -0.09    0.34 
 -28  -1   1   -0.07    0.28 
 -28   1   1   -0.03    0.38 
 -28   1   1   -0.01    0.40 
 -27  -1   1   -0.56    0.24 
 -27  -1   1    0.19    0.37 
 -27   1   1   -0.34    0.27 
 -27   1   1   -0.11    0.28 
 -26  -1   1    0.46    0.38 
 -26  -1   1   -0.13    0.30 
 -26   1   1    0.26    0.33 
 -26   1   1    0.46    0.36 
 -25  -1   1    0.53    0.36 
 -25  -1   1   -0.41    0.21 
 -25   1   1    0.14    0.33 
 -25   1   1    0.02    0.31 
 -24  -1   1    0.47    0.33 
 -24  -1   1    0.31    0.35 
 -24   1   1    0.95    0.40 
 -24   1   1    0.68    0.16 
 -24   1   1    0.55    0.40 
 -23  -1   1    0.28    0.32 
 -23  -1   1    0.31    0.30 
 -23   1   1    0.06    0.14 
 -23   1   1    0.46    0.35 
 -23   1   1    0.31    0.31 
 -22  -1   1    1.60    0.43 
  22  -1  -1    1.30    0.36 
 -22  -1   1    1.74    0.51 
 -22   1   1    2.41    0.52 
 -22   1   1    1.79    0.53 
 -22   1   1    1.73    0.27 
  21  -1  -1    6.89    0.74 
 -21  -1   1    6.90    0.75 
 -21  -1   1    6.36    0.85 
 -21   1   1    6.58    0.86 
 -21   1   1    7.03    0.54 
 -21   1   1    6.35    0.77 
 -21   1   1    6.68    0.43 
 -20  -1   1   -0.20    0.21 
  20  -1  -1    0.11    0.22 
 -20  -1   1    0.18    0.24 
  20   1  -1    0.32    0.24 
 -20   1   1   -0.05    0.17 
 -20   1   1    0.22    0.26 
 -20   1   1    0.13    0.14 
 -20   1   1   -0.37    0.18 
 -19  -1   1    4.49    0.22 
 -19  -1   1    5.60    0.64 
 -19  -1   1    5.04    0.73 
 -19  -1   1    4.93    0.38 
  19  -1  -1    3.80    0.54 
 -19  -1   1    4.89    0.24 
  19   1  -1    4.35    0.52 
 -19   1   1    5.04    0.51 
 -19   1   1    4.64    0.37 
 -19   1   1    4.44    0.66 
 -19   1   1    4.89    0.66 
 -18  -1   1    0.39    0.16 
 -18  -1   1    0.42    0.26 
 -18  -1   1    0.36    0.10 
  18  -1  -1    0.65    0.26 
 -18  -1   1    0.37    0.11 
 -18  -1   1    0.31    0.25 
 -18  -1   1    0.35    0.20 
 -18   1   1    0.30    0.17 
 -18   1   1    0.19    0.20 
 -18   1   1    0.20    0.24 
  18   1  -1    0.15    0.20 
 -18   1   1    0.29    0.23 
 -18   1   1    0.37    0.15 
 -17  -1   1   59.28    1.40 
 -17  -1   1   57.06    1.55 
  17  -1  -1   55.45    1.82 
 -17  -1   1   55.43    1.75 
 -17  -1   1   58.25    1.87 
 -17  -1   1   58.11    2.06 
 -17  -1   1   57.26    1.36 
 -17   1   1   57.49    1.66 
 -17   1   1   58.18    1.54 
 -17   1   1   58.05    1.59 
 -17   1   1   57.23    2.02 
  17   1  -1   57.39    1.77 
 -17   1   1   61.01    1.97 
 -17   1   1   59.33    1.79 
 -16  -1   1    0.56    0.13 
 -16  -1   1    0.73    0.18 
  16  -1  -1    0.61    0.24 
 -16  -1   1    0.53    0.12 
 -16  -1   1    0.53    0.22 
 -16  -1   1    0.50    0.27 
 -16  -1   1    0.47    0.24 
 -16   1   1    0.64    0.17 
 -16   1   1    0.39    0.17 
 -16   1   1    0.38    0.23 
 -16   1   1    0.65    0.28 
  16   1  -1    0.44    0.22 
 -16   1   1    0.85    0.25 
 -16   1   1    0.53    0.16 
 -15  -1   1   12.25    0.46 
 -15  -1   1   13.34    0.82 
 -15  -1   1   13.18    0.72 
  15  -1  -1   14.30    0.74 
 -15  -1   1   13.20    0.68 
 -15  -1   1   13.89    0.49 
 -15  -1   1   14.08    0.56 
 -15   1   1   13.66    0.70 
 -15   1   1   12.60    0.58 
 -15   1   1   13.33    0.82 
 -15   1   1   12.53    0.55 
 -15   1   1   13.81    0.77 
  15   1  -1   13.98    0.69 
 -15   1   1   13.86    0.63 
 -14  -1   1    7.04    0.51 
 -14  -1   1    7.44    0.33 
 -14  -1   1    7.11    0.58 
 -14  -1   1    6.84    0.33 
 -14  -1   1    6.64    0.37 
 -14  -1   1    7.12    0.48 
 -14   1   1    7.78    0.56 
 -14   1   1    7.13    0.57 
 -14   1   1    7.03    0.41 
 -14   1   1    8.46    0.42 
  14   1  -1    6.85    0.47 
 -14   1   1    8.26    0.45 
 -14   1   1    8.31    0.51 
 -13  -1   1   33.44    0.90 
 -13  -1   1   35.37    0.98 
 -13  -1   1   33.82    1.29 
 -13  -1   1   35.39    1.16 
 -13  -1   1   32.92    0.92 
 -13  -1   1   35.00    1.19 
  13   1  -1   33.23    1.12 
 -13   1   1   35.08    1.06 
 -13   1   1   34.56    1.01 
 -13   1   1   34.55    1.29 
 -13   1   1   32.93    1.03 
 -13   1   1   35.74    1.26 
 -13   1   1   34.28    1.15 
 -12  -1   1    0.36    0.15 
 -12  -1   1    0.24    0.15 
 -12  -1   1    0.23    0.09 
 -12  -1   1    0.12    0.09 
 -12  -1   1    0.11    0.15 
 -12  -1   1    0.25    0.09 
 -12   1   1    0.13    0.10 
 -12   1   1    0.12    0.15 
 -12   1   1    0.30    0.12 
 -12   1   1    0.11    0.12 
 -12   1   1    0.22    0.11 
 -12   1   1    0.34    0.18 
  12   1  -1    0.21    0.13 
 -11  -1   1  108.84    2.69 
 -11  -1   1  112.65    2.47 
 -11  -1   1  110.42    2.43 
 -11  -1   1  110.15    2.44 
 -11  -1   1  113.14    2.68 
 -11  -1   1  111.32    2.28 
 -11  -1   1  113.64    2.85 
  11   1  -1  111.94    2.64 
 -11   1   1  110.26    2.53 
 -11   1   1  109.74    2.56 
 -11   1   1  109.52    2.81 
 -11   1   1  111.71    2.68 
 -11   1   1  108.49    2.57 
 -11   1   1  112.06    2.78 
 -10  -1   1   54.75    1.49 
 -10  -1   1   53.05    1.16 
 -10  -1   1   54.53    1.28 
 -10  -1   1   54.62    1.29 
 -10  -1   1   53.23    1.59 
 -10  -1   1   54.31    1.30 
 -10  -1   1   51.34    1.46 
 -10  -1   1   55.47    1.18 
 -10   1   1   52.49    1.36 
 -10   1   1   54.11    1.39 
 -10   1   1   52.99    1.57 
 -10   1   1   54.03    1.55 
 -10   1   1   53.84    1.47 
  10   1  -1   52.89    1.44 
 -10   1   1   52.74    1.38 
  -9  -1   1    2.14    0.16 
  -9  -1   1    2.07    0.16 
  -9  -1   1    1.94    0.25 
  -9  -1   1    2.26    0.16 
  -9  -1   1    2.16    0.26 
  -9  -1   1    1.78    0.27 
  -9  -1   1    2.02    0.11 
  -9  -1   1    2.25    0.12 
  -9   1   1    1.68    0.20 
  -9   1   1    2.41    0.30 
  -9   1   1    2.32    0.23 
  -9   1   1    1.69    0.23 
   9   1  -1    2.86    0.28 
  -9   1   1    1.95    0.21 
  -9   1   1    2.46    0.30 
  -8  -1   1   18.04    0.52 
  -8  -1   1   17.09    0.63 
  -8  -1   1   16.82    0.44 
  -8  -1   1   17.47    0.70 
  -8  -1   1   18.31    0.64 
  -8  -1   1   17.21    0.52 
  -8  -1   1   17.06    0.51 
  -8   1   1   17.77    0.59 
   8   1  -1   18.47    0.62 
  -8   1   1   17.78    0.68 
  -8   1   1   17.60    0.64 
  -8   1   1   18.01    0.69 
  -8   1   1   17.58    0.58 
   8   1  -1   18.11    0.44 
  -8   1   1   16.89    0.58 
  -7  -1   1   87.15    1.91 
  -7  -1   1   89.96    2.15 
  -7  -1   1   87.85    2.04 
  -7  -1   1   87.65    2.06 
  -7  -1   1   86.72    1.91 
  -7  -1   1   87.63    1.84 
  -7  -1   1   90.18    1.91 
   7  -1  -1   89.09    1.80 
  -7   1   1   84.42    2.09 
   7   1  -1   87.31    2.02 
  -7   1   1   86.22    2.10 
  -7   1   1   87.31    1.99 
  -7   1   1   85.69    2.00 
  -7   1   1   85.45    1.99 
  -7   1   1   89.37    2.06 
   7   1  -1   86.25    1.83 
  -6  -1   1   65.48    1.67 
  -6  -1   1   68.21    1.50 
   6  -1  -1   69.21    1.42 
  -6  -1   1   68.95    1.63 
  -6  -1   1   67.05    1.50 
  -6  -1   1   66.74    1.59 
  -6  -1   1   67.77    1.50 
  -6  -1   1   66.35    1.50 
  -6  -1   1   65.13    1.44 
  -6   1   1   68.40    1.62 
  -6   1   1   66.38    1.64 
  -6   1   1   69.27    1.58 
   6   1  -1   65.33    1.44 
  -6   1   1   68.22    1.58 
   6   1  -1   70.79    1.60 
  -6   1   1   65.46    1.56 
  -6   1   1   69.41    1.67 
  -5  -1   1  975.18   19.99 
  -5  -1   1  977.51   20.43 
   5  -1  -1  986.35   19.75 
  -5  -1   1  977.10   20.06 
  -5  -1   1  977.03   19.99 
   5  -1  -1 1000.00   20.05 
  -5  -1   1  988.68   19.82 
  -5  -1   1  964.15   19.90 
  -5  -1   1  958.93   19.95 
  -5  -1   1  974.29   19.93 
  -5   1   1  984.34   20.37 
  -5   1   1  997.84   20.25 
  -5   1   1  954.16   20.29 
  -5   1   1  989.36   20.25 
  -5   1   1  991.86   20.06 
   5   1  -1  998.28   19.88 
  -5   1   1  971.73   19.88 
   5   1  -1  968.15   19.94 
  -4  -1   1   23.28    0.61 
  -4  -1   1   22.84    0.61 
   4  -1  -1   24.84    0.57 
  -4  -1   1   24.30    0.61 
   4  -1  -1   26.44    0.69 
  -4  -1   1   25.36    0.62 
  -4  -1   1   24.47    0.68 
  -4  -1   1   24.53    0.58 
  -4  -1   1   25.08    0.69 
  -4  -1   1   24.53    0.64 
   4   1  -1   24.72    0.59 
  -4   1   1   24.33    0.68 
  -4   1   1   25.36    0.70 
  -4   1   1   23.75    0.65 
  -4   1   1   25.05    0.67 
  -4   1   1   24.76    0.67 
   4   1  -1   24.70    0.65 
  -3  -1   1  112.00    2.31 
  -3  -1   1  108.52    2.32 
  -3  -1   1  105.73    2.31 
  -3  -1   1  107.98    2.36 
   3  -1  -1  107.93    2.28 
   3  -1  -1  110.31    2.28 
   3  -1  -1  108.94    2.36 
  -3  -1   1  110.52    2.31 
  -3  -1   1  110.28    2.31 
   3  -1  -1  115.66    2.38 
  -3  -1   1  107.32    2.37 
  -3  -1   1  108.30    2.31 
  -3  -1   1  110.14    2.28 
   3   1  -1  111.45    2.34 
   3   1  -1  109.61    2.29 
  -3   1   1  113.22    2.37 
  -3   1   1  112.40    2.35 
  -3   1   1  114.12    2.36 
  -3   1   1  110.55    2.37 
  -3   1   1  109.79    2.36 
  -2  -1   1  189.63    3.95 
  -2  -1   1  196.00    3.93 
   2  -1  -1  192.23    3.92 
  -2  -1   1  190.75    3.94 
   2  -1  -1  198.15    3.99 
  -2  -1   1  194.56    3.98 
  -2  -1   1  192.19    3.94 
   2  -1  -1  196.48    3.98 
  -2  -1   1  189.69    3.94 
   2  -1  -1  188.81    3.91 
   2   1  -1  192.66    3.93 
  -2   1   1  191.27    3.97 
   2   1  -1  192.86    3.95 
  -2   1   1  194.07    3.98 
  -1  -1   1  402.55    8.16 
   1  -1  -1  403.71    8.41 
   1  -1  -1  397.60    8.16 
  -1  -1   1  410.95    8.35 
  -1  -1   1  393.53    8.26 
   1  -1  -1  400.75    8.18 
   1  -1  -1  404.82    8.30 
  -1  -1   1  395.55    8.34 
  -1  -1   1  389.58    8.15 
   1   1  -1  399.99    8.25 
   1   1  -1  391.79    8.31 
   1   1  -1  411.29    8.26 
  -1   1   1  399.19    8.33 
  -1   1   1  403.31    8.19 
   0  -1   1  571.28   11.74 
   0  -1   1  575.67   11.62 
   0  -1   1  580.01   11.63 
   0  -1  -1  579.56   11.63 
   0  -1  -1  576.82   11.59 
   0  -1  -1  565.45   11.63 
   0  -1   1  546.00   11.69 
   0  -1  -1  567.52   11.69 
   0  -1  -1  567.40   11.67 
   0   1   1  561.15   11.61 
   0   1   1  545.37   11.59 
   0   1  -1  561.98   11.77 
   0   1  -1  581.27   11.69 
   0   1   1  574.57   11.57 
  -1  -1  -1  651.17   13.34 
  -1  -1  -1  653.66   13.32 
   1  -1   1  655.54   13.43 
  -1  -1  -1  667.94   13.21 
  -1  -1  -1  659.35   13.35 
   1  -1   1  664.09   13.49 
  -1  -1  -1  654.21   13.35 
  -1  -1  -1  665.30   13.34 
  -1  -1  -1  653.46   13.50 
  -1  -1  -1  650.60   13.33 
  -1  -1  -1  642.03   13.36 
  -1   1  -1  660.94   13.25 
  -1   1  -1  650.34   13.52 
   1   1   1  653.38   13.33 
  -1   1  -1  666.89   13.52 
   1   1   1  649.78   13.21 
  -1   1  -1  651.09   13.41 
  -2  -1  -1   51.95    1.10 
   2  -1   1   51.33    1.17 
  -2  -1  -1   51.50    1.15 
  -2  -1  -1   51.51    1.10 
  -2  -1  -1   52.75    1.16 
   2  -1   1   52.63    1.13 
  -2  -1  -1   52.32    1.09 
  -2  -1  -1   52.78    1.09 
  -2  -1  -1   50.84    1.20 
   2  -1   1   54.59    1.18 
  -2  -1  -1   52.95    1.15 
   2   1   1   52.84    1.08 
  -2   1  -1   50.93    1.17 
  -2   1  -1   52.92    1.16 
  -2   1  -1   53.69    1.18 
  -2   1  -1   53.33    1.17 
   2   1   1   53.06    1.10 
  -2   1  -1   51.22    1.16 
  -2   1  -1   54.19    1.21 
  -3  -1  -1  148.10    3.10 
  -3  -1  -1  153.00    3.10 
  -3  -1  -1  151.73    3.01 
  -3  -1  -1  155.68    3.21 
  -3  -1  -1  147.39    3.01 
   3  -1   1  149.67    3.12 
  -3  -1  -1  150.04    3.09 
   3  -1   1  147.51    3.06 
   3   1   1  153.53    3.06 
  -3   1  -1  149.10    3.12 
  -3   1  -1  145.37    3.11 
  -3   1  -1  146.89    3.12 
  -3   1  -1  149.39    3.19 
  -3   1  -1  150.49    3.15 
   4  -1   1  252.65    5.24 
  -4  -1  -1  250.99    5.23 
  -4  -1  -1  260.27    5.36 
   4  -1   1  249.95    5.16 
  -4  -1  -1  254.53    5.25 
  -4  -1  -1  260.21    5.24 
  -4  -1  -1  251.98    5.20 
  -4   1  -1  251.58    5.23 
  -4   1  -1  260.09    5.24 
   4   1   1  261.86    5.20 
  -4   1  -1  256.91    5.24 
  -4   1  -1  258.63    5.35 
  -4   1  -1  256.09    5.31 
  -4   1  -1  256.69    5.23 
   5  -1   1  126.08    2.74 
  -5  -1  -1  132.71    2.74 
  -5  -1  -1  130.96    2.75 
  -5  -1  -1  126.83    2.69 
   5  -1   1  131.29    2.64 
  -5  -1  -1  126.55    2.89 
  -5  -1  -1  130.67    2.79 
  -5   1  -1  130.21    2.75 
  -5   1  -1  126.32    2.87 
  -5   1  -1  127.94    2.73 
  -5   1  -1  131.42    2.75 
  -5   1  -1  128.59    2.85 
   5   1   1  128.45    2.72 
  -5   1  -1  128.64    2.74 
  -6  -1  -1    5.95    0.15 
  -6  -1  -1    6.37    0.30 
  -6  -1  -1    5.13    0.26 
   6  -1   1    5.09    0.17 
  -6  -1  -1    5.40    0.33 
   6  -1   1    5.44    0.25 
  -6  -1  -1    4.95    0.15 
  -6  -1  -1    5.37    0.24 
  -6  -1  -1    4.92    0.20 
  -6   1  -1    5.05    0.31 
  -6   1  -1    5.24    0.25 
  -6   1  -1    4.87    0.25 
  -6   1  -1    5.33    0.31 
  -6   1  -1    5.50    0.25 
   6   1   1    4.86    0.24 
  -6   1  -1    5.29    0.24 
  -7  -1  -1   17.74    0.70 
   7  -1   1   18.72    0.55 
  -7  -1  -1   18.66    0.63 
  -7  -1  -1   18.60    0.55 
   7  -1   1   18.30    0.43 
  -7  -1  -1   18.84    0.59 
  -7  -1  -1   18.49    0.49 
  -7  -1  -1   18.13    0.43 
  -7   1  -1   18.72    0.69 
  -7   1  -1   18.32    0.56 
  -7   1  -1   17.75    0.68 
  -7   1  -1   17.77    0.54 
   7   1   1   19.71    0.58 
  -7   1  -1   18.20    0.56 
  -7   1  -1   18.05    0.58 
  -8  -1  -1    3.24    0.26 
  -8  -1  -1    2.12    0.29 
   8  -1   1    3.13    0.19 
   8  -1   1    2.85    0.10 
  -8  -1  -1    2.93    0.15 
  -8  -1  -1    3.01    0.11 
  -8  -1  -1    2.69    0.19 
  -8  -1  -1    2.85    0.26 
  -8  -1  -1    2.91    0.13 
  -8   1  -1    2.55    0.18 
  -8   1  -1    2.49    0.30 
  -8   1  -1    2.82    0.22 
  -8   1  -1    2.79    0.32 
  -8   1  -1    2.78    0.20 
   8   1   1    2.83    0.21 
  -8   1  -1    2.82    0.20 
  -9  -1  -1  183.54    3.98 
  -9  -1  -1  185.55    3.78 
  -9  -1  -1  179.75    4.22 
  -9  -1  -1  183.30    3.71 
  -9  -1  -1  183.07    3.70 
  -9  -1  -1  182.37    4.08 
  -9  -1  -1  185.18    3.89 
  -9  -1  -1  186.96    3.78 
   9  -1   1  188.27    3.87 
  -9   1  -1  182.05    4.17 
   9   1   1  188.06    3.98 
  -9   1  -1  185.71    4.21 
  -9   1  -1  184.37    3.90 
  -9   1  -1  182.11    3.93 
  -9   1  -1  182.62    3.98 
  -9   1  -1  180.12    3.92 
 -10  -1  -1    1.18    0.11 
 -10  -1  -1    1.09    0.07 
 -10  -1  -1    1.06    0.19 
 -10  -1  -1    0.96    0.23 
 -10  -1  -1    1.37    0.24 
  10  -1   1    1.22    0.16 
 -10  -1  -1    1.15    0.16 
 -10  -1  -1    1.37    0.13 
 -10   1  -1    1.18    0.25 
 -10   1  -1    1.15    0.17 
  10   1   1    1.15    0.19 
 -10   1  -1    1.01    0.15 
 -10   1  -1    0.93    0.22 
 -10   1  -1    1.46    0.18 
 -10   1  -1    1.34    0.20 
 -11  -1  -1   39.97    0.97 
 -11  -1  -1   40.72    1.26 
 -11  -1  -1   39.50    0.89 
 -11  -1  -1   40.63    1.38 
 -11  -1  -1   42.04    1.05 
 -11  -1  -1   40.37    1.15 
 -11  -1  -1   40.35    0.87 
  11  -1   1   38.73    1.02 
 -11  -1  -1   39.49    0.98 
 -11   1  -1   39.50    1.15 
 -11   1  -1   40.53    1.09 
 -11   1  -1   40.91    1.06 
 -11   1  -1   37.85    1.30 
 -11   1  -1   39.06    1.09 
 -11   1  -1   38.44    1.33 
  11   1   1   39.19    1.15 
 -12  -1  -1   56.27    1.36 
 -12  -1  -1   54.07    1.31 
 -12  -1  -1   55.12    1.63 
 -12  -1  -1   54.93    1.76 
 -12  -1  -1   56.25    1.31 
  12  -1   1   56.79    1.36 
 -12  -1  -1   56.13    1.51 
 -12   1  -1   55.17    1.51 
 -12   1  -1   54.69    1.38 
 -12   1  -1   56.46    1.75 
 -12   1  -1   55.99    1.44 
  12   1   1   55.88    1.52 
 -12   1  -1   53.82    1.41 
 -12   1  -1   55.08    1.69 
 -13  -1  -1   76.81    2.13 
 -13  -1  -1   79.58    1.78 
 -13  -1  -1   78.08    2.30 
 -13  -1  -1   79.75    1.81 
 -13  -1  -1   76.84    1.98 
  13  -1   1   78.53    1.80 
  13   1   1   76.90    1.92 
 -13   1  -1   74.81    2.19 
 -13   1  -1   76.94    1.83 
 -13   1  -1   75.98    2.26 
 -13   1  -1   76.95    1.99 
 -13   1  -1   77.31    1.91 
  13   1   1   76.96    2.00 
 -13   1  -1   76.69    1.87 
 -14  -1  -1   17.43    0.94 
 -14  -1  -1   15.68    0.80 
 -14  -1  -1   16.71    0.71 
 -14  -1  -1   17.56    0.57 
  14   1   1   17.18    0.74 
  14   1   1   16.43    0.66 
 -14   1  -1   16.99    0.91 
 -14   1  -1   17.73    0.73 
 -14   1  -1   17.98    0.64 
 -14   1  -1   17.20    0.60 
 -14   1  -1   18.83    0.69 
 -14   1  -1   17.56    0.89 
 -15  -1  -1   24.99    0.75 
 -15  -1  -1   25.23    0.93 
 -15  -1  -1   25.05    1.18 
 -15  -1  -1   23.86    1.04 
 -15   1  -1   25.49    1.12 
  15   1   1   24.83    0.94 
 -15   1  -1   23.98    0.92 
 -15   1  -1   24.40    0.81 
 -15   1  -1   23.68    0.85 
 -15   1  -1   25.68    0.78 
 -15   1  -1   23.90    1.14 
 -16  -1  -1    4.22    0.29 
 -16  -1  -1    4.27    0.44 
 -16  -1  -1    3.89    0.57 
  16  -1   1    4.63    0.53 
 -16  -1  -1    4.12    0.52 
 -16   1  -1    4.85    0.64 
 -16   1  -1    4.40    0.57 
 -16   1  -1    3.93    0.28 
 -16   1  -1    4.55    0.42 
 -16   1  -1    3.76    0.30 
  16   1   1    4.10    0.45 
 -16   1  -1    5.11    0.48 
  17  -1   1   11.85    0.72 
 -17  -1  -1   12.53    0.76 
 -17  -1  -1   11.62    0.85 
 -17  -1  -1   11.80    0.50 
  17   1   1   11.11    0.65 
 -17   1  -1   12.55    0.53 
 -17   1  -1   14.52    0.92 
 -17   1  -1   11.88    0.79 
 -17   1  -1   12.42    0.50 
 -17   1  -1   12.17    0.60 
 -18  -1  -1    0.32    0.25 
 -18  -1  -1    0.67    0.28 
  18  -1   1    0.19    0.23 
 -18   1  -1    0.18    0.17 
 -18   1  -1    0.12    0.11 
 -18   1  -1    0.49    0.27 
 -18   1  -1    0.00    0.22 
  18   1   1    0.38    0.21 
 -18   1  -1    0.18    0.13 
  19  -1   1    7.58    0.71 
 -19  -1  -1    6.53    0.72 
 -19  -1  -1    6.93    0.84 
 -19   1  -1    6.02    0.79 
 -19   1  -1    6.61    0.35 
 -19   1  -1    6.27    0.36 
 -19   1  -1    6.37    0.74 
 -19   1  -1    6.96    0.48 
 -20  -1  -1    1.95    0.49 
  20  -1   1    1.66    0.37 
 -20  -1  -1    1.68    0.41 
 -20   1  -1    2.57    0.52 
 -20   1  -1    2.03    0.50 
 -20   1  -1    1.80    0.22 
 -20   1  -1    2.18    0.24 
 -21  -1  -1    6.23    0.73 
 -21  -1  -1    4.13    0.70 
 -21   1  -1    5.67    0.30 
 -21   1  -1    6.05    0.77 
 -21   1  -1    6.08    0.32 
 -21   1  -1    6.47    0.85 
 -22  -1  -1    0.05    0.30 
 -22  -1  -1    0.27    0.32 
 -22   1  -1    0.34    0.35 
 -22   1  -1    0.33    0.34 
 -23  -1  -1    0.00    0.25 
 -23  -1  -1    0.24    0.30 
 -23   1  -1   -0.24    0.27 
 -23   1  -1    0.72    0.40 
 -24  -1  -1    0.11    0.34 
 -24  -1  -1    0.00    0.29 
 -24   1  -1    0.21    0.32 
 -24   1  -1    0.01    0.26 
 -25  -1  -1    4.46    0.71 
 -25  -1  -1    5.76    0.91 
 -25   1  -1    6.26    0.96 
 -25   1  -1    6.11    0.85 
 -26  -1  -1    1.98    0.57 
 -26  -1  -1    2.47    0.68 
 -26   1  -1    2.49    0.60 
 -26   1  -1    2.50    0.67 
 -27  -1  -1    0.59    0.50 
 -27  -1  -1    0.96    0.43 
 -27   1  -1    0.18    0.41 
 -27   1  -1    0.97    0.46 
 -27  -2   1    0.36    0.37 
 -27  -2   1   -0.40    0.26 
 -27   2   1   -0.12    0.31 
 -27   2   1   -0.35    0.23 
 -26  -2   1    7.06    1.02 
 -26  -2   1    6.79    0.85 
 -26   2   1    7.19    0.40 
 -26   2   1    8.23    1.11 
 -26   2   1    7.01    0.92 
 -25  -2   1    1.30    0.45 
 -25  -2   1    0.98    0.44 
 -25   2   1    1.67    0.27 
 -25   2   1    0.90    0.45 
 -25   2   1    0.96    0.46 
 -24  -2   1   16.62    1.04 
 -24  -2   1   18.00    1.30 
 -24   2   1   18.30    1.29 
 -24   2   1   18.24    0.77 
 -24   2   1   17.83    1.20 
 -23  -2   1    0.07    0.33 
 -23  -2   1   -0.14    0.22 
  23  -2  -1    0.15    0.25 
 -23   2   1   -0.11    0.24 
 -23   2   1    0.05    0.27 
 -23   2   1    0.21    0.16 
 -22  -2   1   29.99    1.60 
  22  -2  -1   33.28    1.46 
 -22  -2   1   31.85    1.40 
 -22   2   1   30.59    1.25 
 -22   2   1   30.91    1.11 
 -22   2   1   26.91    1.51 
 -22   2   1   31.42    1.51 
  21  -2  -1    1.39    0.39 
 -21  -2   1    1.22    0.42 
 -21  -2   1    1.50    0.38 
 -21   2   1    1.16    0.27 
 -21   2   1    0.77    0.37 
 -21   2   1    1.50    0.44 
 -21   2   1    1.78    0.36 
 -20  -2   1   44.81    1.64 
  20  -2  -1   46.57    1.71 
 -20  -2   1   41.39    1.84 
 -20   2   1   42.90    1.40 
 -20   2   1   43.16    1.75 
 -20   2   1   45.39    1.52 
 -20   2   1   42.61    1.83 
 -19  -2   1    1.20    0.39 
 -19  -2   1    1.48    0.36 
  19  -2  -1    0.78    0.28 
 -19   2   1    1.33    0.40 
  19   2  -1    1.45    0.32 
 -19   2   1    1.70    0.33 
 -19   2   1    1.80    0.43 
 -19   2   1    1.66    0.30 
  18  -2  -1   30.91    1.32 
 -18  -2   1   33.42    1.05 
 -18  -2   1   34.52    1.28 
 -18  -2   1   33.53    1.52 
 -18  -2   1   33.47    1.32 
 -18   2   1   33.86    1.23 
 -18   2   1   32.56    1.27 
 -18   2   1   33.94    1.17 
 -18   2   1   31.61    1.46 
  18   2  -1   35.03    1.27 
 -18   2   1   35.45    1.47 
 -17  -2   1   23.45    1.21 
 -17  -2   1   24.05    0.82 
 -17  -2   1   26.29    1.05 
 -17  -2   1   24.20    0.61 
 -17  -2   1   22.96    1.04 
 -17  -2   1   24.55    0.60 
  17   2  -1   24.63    1.00 
 -17   2   1   23.14    0.93 
 -17   2   1   25.51    1.18 
 -17   2   1   23.66    1.20 
 -17   2   1   24.68    0.98 
 -17   2   1   24.26    1.04 
 -16  -2   1    5.83    0.59 
 -16  -2   1    6.11    0.49 
 -16  -2   1    5.39    0.24 
 -16  -2   1    5.07    0.63 
 -16  -2   1    5.59    0.25 
 -16  -2   1    5.40    0.35 
 -16   2   1    5.42    0.44 
 -16   2   1    6.15    0.70 
  16   2  -1    6.42    0.57 
 -16   2   1    5.13    0.41 
 -16   2   1    5.95    0.64 
 -16   2   1    5.46    0.55 
 -15  -2   1   14.20    0.45 
 -15  -2   1   13.62    0.71 
 -15  -2   1   13.93    0.56 
 -15  -2   1   13.73    0.45 
 -15  -2   1   13.20    0.71 
 -15  -2   1   14.09    0.85 
  15   2  -1   14.00    0.69 
 -15   2   1   13.97    0.62 
 -15   2   1   12.29    0.77 
 -15   2   1   13.60    0.72 
 -15   2   1   13.42    0.81 
 -15   2   1   14.31    0.67 
 -15   2   1   15.13    0.70 
 -14  -2   1   64.69    1.48 
 -14  -2   1   64.93    1.60 
 -14  -2   1   62.55    1.83 
 -14  -2   1   63.15    2.03 
 -14  -2   1   63.40    1.48 
 -14  -2   1   65.29    1.84 
 -14   2   1   62.04    1.99 
 -14   2   1   66.58    2.01 
 -14   2   1   63.95    1.84 
 -14   2   1   62.96    1.70 
  14   2  -1   65.54    1.79 
 -14   2   1   67.31    1.80 
 -14   2   1   61.69    1.74 
 -13  -2   1    0.18    0.15 
 -13  -2   1    0.13    0.08 
 -13  -2   1    0.22    0.15 
 -13  -2   1    0.19    0.16 
 -13  -2   1    0.28    0.09 
 -13  -2   1    0.18    0.10 
 -13  -2   1    0.30    0.08 
 -13  -2   1    0.23    0.09 
  13   2  -1    0.05    0.12 
 -13   2   1   -0.05    0.12 
 -13   2   1    0.19    0.14 
 -13   2   1    0.31    0.13 
 -13   2   1    0.18    0.16 
 -13   2   1    0.28    0.14 
 -13   2   1    0.29    0.18 
 -12  -2   1   69.43    1.84 
 -12  -2   1   68.38    1.57 
 -12  -2   1   67.18    1.56 
 -12  -2   1   68.62    1.54 
 -12  -2   1   68.40    1.63 
 -12  -2   1   67.96    1.51 
 -12  -2   1   67.66    2.02 
 -12  -2   1   67.02    1.85 
 -12   2   1   68.93    1.99 
 -12   2   1   65.75    1.74 
 -12   2   1   66.61    1.79 
 -12   2   1   67.87    1.86 
 -12   2   1   65.09    1.95 
 -12   2   1   66.91    1.79 
  12   2  -1   69.54    1.80 
  11  -2  -1   30.92    0.70 
 -11  -2   1   30.29    0.85 
 -11  -2   1   30.58    0.77 
 -11  -2   1   30.15    0.79 
 -11  -2   1   31.23    1.01 
 -11  -2   1   29.93    1.02 
 -11  -2   1   28.41    1.11 
 -11  -2   1   31.83    0.82 
 -11  -2   1   30.30    0.81 
 -11   2   1   32.24    0.97 
 -11   2   1   28.28    1.01 
  11   2  -1   30.70    0.98 
 -11   2   1   30.43    1.10 
 -11   2   1   27.79    1.07 
 -11   2   1   30.26    0.98 
 -11   2   1   30.06    0.99 
 -10  -2   1   22.08    0.63 
 -10  -2   1   22.08    0.67 
 -10  -2   1   22.72    0.62 
 -10  -2   1   21.97    0.90 
 -10  -2   1   21.65    0.81 
 -10  -2   1   22.42    0.60 
 -10  -2   1   23.05    0.68 
 -10  -2   1   21.52    0.63 
 -10  -2   1   23.01    0.79 
  10  -2  -1   21.91    0.56 
 -10   2   1   22.26    0.78 
 -10   2   1   22.41    0.87 
 -10   2   1   21.28    0.87 
 -10   2   1   22.36    0.82 
  10   2  -1   23.51    0.78 
 -10   2   1   21.47    0.78 
 -10   2   1   21.93    0.76 
  -9  -2   1    0.64    0.15 
  -9  -2   1    0.47    0.11 
  -9  -2   1    0.55    0.18 
  -9  -2   1    0.55    0.16 
   9  -2  -1    1.06    0.11 
  -9  -2   1    0.41    0.09 
  -9  -2   1    0.34    0.08 
  -9  -2   1    0.43    0.09 
   9  -2  -1    0.53    0.14 
  -9  -2   1    0.37    0.10 
  -9  -2   1    0.36    0.08 
  -9   2   1    0.33    0.13 
  -9   2   1    0.71    0.18 
  -9   2   1    0.45    0.14 
  -9   2   1    0.49    0.16 
  -9   2   1    0.47    0.14 
   9   2  -1    0.37    0.12 
  -9   2   1    0.52    0.14 
   8  -2  -1   25.10    0.63 
  -8  -2   1   24.99    0.70 
  -8  -2   1   24.90    0.77 
  -8  -2   1   24.52    0.66 
   8  -2  -1   25.85    0.82 
  -8  -2   1   24.66    0.67 
  -8  -2   1   24.23    0.69 
  -8  -2   1   24.68    0.82 
  -8  -2   1   24.08    0.63 
  -8  -2   1   25.06    0.88 
  -8  -2   1   24.34    0.68 
  -8   2   1   25.28    0.80 
  -8   2   1   22.79    0.80 
  -8   2   1   23.59    0.80 
   8   2  -1   24.99    0.59 
  -8   2   1   25.15    0.85 
  -8   2   1   24.19    0.86 
   8   2  -1   23.74    0.76 
  -8   2   1   23.04    0.77 
   7  -2  -1    2.30    0.15 
  -7  -2   1    2.41    0.16 
   7  -2  -1    2.29    0.25 
  -7  -2   1    2.36    0.17 
  -7  -2   1    2.33    0.14 
  -7  -2   1    2.20    0.17 
  -7  -2   1    2.13    0.27 
  -7  -2   1    3.11    0.21 
  -7  -2   1    2.72    0.18 
  -7  -2   1    2.69    0.28 
  -7  -2   1    2.20    0.16 
  -7   2   1    2.27    0.26 
  -7   2   1    2.29    0.28 
   7   2  -1    2.38    0.13 
  -7   2   1    2.52    0.26 
  -7   2   1    2.51    0.27 
  -7   2   1    2.49    0.25 
  -7   2   1    2.60    0.22 
   7   2  -1    2.07    0.22 
  -6  -2   1   63.07    1.43 
  -6  -2   1   58.55    1.55 
   6  -2  -1   61.48    1.54 
  -6  -2   1   60.56    1.53 
   6  -2  -1   61.92    1.37 
   6  -2  -1   63.46    1.63 
  -6  -2   1   60.10    1.40 
  -6  -2   1   60.05    1.35 
  -6  -2   1   60.27    1.39 
  -6  -2   1   61.92    1.45 
  -6  -2   1   60.67    1.43 
  -6  -2   1   60.97    1.42 
  -6   2   1   62.44    1.57 
   6   2  -1   60.84    1.34 
   6   2  -1   62.93    1.48 
  -6   2   1   62.42    1.51 
  -6   2   1   60.97    1.54 
  -6   2   1   60.44    1.51 
  -6   2   1   59.65    1.52 
  -5  -2   1  164.21    3.41 
  -5  -2   1  163.88    3.42 
  -5  -2   1  160.79    3.41 
  -5  -2   1  162.37    3.39 
  -5  -2   1  160.22    3.42 
   5  -2  -1  165.37    3.54 
   5  -2  -1  156.64    3.51 
  -5  -2   1  158.10    3.51 
   5  -2  -1  164.34    3.38 
  -5  -2   1  164.72    3.53 
  -5  -2   1  161.86    3.35 
   5  -2  -1  163.19    3.40 
   5   2  -1  158.65    3.35 
  -5   2   1  160.09    3.52 
  -5   2   1  163.74    3.51 
  -5   2   1  161.92    3.54 
   5   2  -1  162.03    3.45 
  -5   2   1  163.54    3.54 
   4  -2  -1    1.25    0.13 
  -4  -2   1    1.39    0.17 
  -4  -2   1    1.40    0.11 
  -4  -2   1    1.43    0.14 
   4  -2  -1    1.78    0.21 
  -4  -2   1    1.22    0.15 
   4  -2  -1    1.47    0.14 
  -4  -2   1    1.30    0.14 
   4  -2  -1    1.42    0.18 
  -4  -2   1    1.67    0.16 
  -4  -2   1    1.31    0.16 
  -4  -2   1    1.48    0.15 
   4   2  -1    1.31    0.11 
   4   2  -1    1.45    0.16 
  -4   2   1    1.80    0.20 
  -4   2   1    1.73    0.19 
  -4   2   1    1.65    0.19 
  -3  -2   1   94.92    2.14 
  -3  -2   1   93.32    2.09 
  -3  -2   1   94.26    2.07 
  -3  -2   1   93.56    2.08 
   3  -2  -1   97.10    2.16 
   3  -2  -1   95.40    2.06 
  -3  -2   1   98.70    2.07 
   3  -2  -1   96.03    2.17 
  -3  -2   1   93.06    2.03 
  -3  -2   1   92.11    2.09 
   3  -2  -1   97.38    2.07 
  -3  -2   1   94.60    2.09 
   3   2  -1   96.28    2.09 
  -3   2   1   96.54    2.15 
   3   2  -1   96.93    2.07 
  -3   2   1   99.76    2.15 
  -3   2   1   98.40    2.12 
  -2  -2   1   59.27    1.43 
   2  -2  -1   60.53    1.45 
  -2  -2   1   61.68    1.42 
   2  -2  -1   60.35    1.38 
  -2  -2   1   62.94    1.38 
  -2  -2   1   62.24    1.39 
   2  -2  -1   61.50    1.39 
  -2  -2   1   59.25    1.41 
  -2  -2   1   60.22    1.36 
  -2  -2   1   61.94    1.41 
  -2  -2   1   60.60    1.36 
   2  -2  -1   61.40    1.46 
  -2   2   1   61.96    1.43 
  -2   2   1   59.45    1.43 
   2   2  -1   61.84    1.41 
   2   2  -1   61.61    1.39 
   2   2  -1   61.31    1.40 
  -2   2   1   61.94    1.45 
  -2   2   1   62.25    1.39 
  -1  -2   1  139.80    2.94 
   1  -2  -1  139.52    2.96 
   1  -2  -1  141.04    2.95 
  -1  -2   1  137.94    2.98 
  -1  -2   1  136.79    2.98 
  -1  -2   1  145.96    3.00 
  -1  -2   1  138.07    2.87 
   1  -2  -1  140.67    3.00 
  -1  -2   1  137.93    2.96 
   1  -2  -1  146.24    3.02 
  -1   2   1  138.37    2.96 
   1   2  -1  139.04    2.97 
   1   2  -1  140.51    2.95 
  -1   2   1  136.56    2.99 
   1   2  -1  138.69    2.98 
   1   2  -1  142.93    2.91 
  -1   2   1  142.23    3.00 
   0  -2  -1   48.42    1.16 
   0  -2   1   48.94    1.18 
   0  -2   1   48.44    1.18 
   0  -2  -1   50.55    1.18 
   0  -2  -1   47.48    1.14 
   0  -2   1   49.40    1.16 
   0  -2  -1   50.36    1.18 
   0  -2   1   51.90    1.16 
   0   2  -1   47.91    1.12 
   0   2   1   49.91    1.13 
   0   2  -1   49.43    1.15 
   0   2  -1   48.64    1.18 
   0   2   1   51.24    1.17 
   0   2   1   48.43    1.17 
   0   2  -1   49.99    1.18 
   1  -2   1    1.76    0.17 
  -1  -2  -1    1.59    0.15 
  -1  -2  -1    2.07    0.16 
  -1  -2  -1    2.15    0.16 
  -1  -2  -1    1.88    0.15 
   1  -2   1    2.14    0.16 
  -1  -2  -1    2.09    0.16 
  -1  -2  -1    2.01    0.15 
   1  -2   1    2.07    0.17 
  -1  -2  -1    1.95    0.16 
  -1   2  -1    2.00    0.16 
  -1   2  -1    1.97    0.17 
   1   2   1    2.03    0.13 
  -1   2  -1    2.37    0.16 
   1   2   1    2.05    0.15 
  -1   2  -1    1.70    0.16 
  -2  -2  -1   34.70    0.87 
  -2  -2  -1   34.53    0.89 
   2  -2   1   36.31    0.92 
  -2  -2  -1   35.16    0.85 
  -2  -2  -1   36.53    0.86 
  -2  -2  -1   34.78    0.88 
   2  -2   1   35.06    0.86 
  -2  -2  -1   34.12    0.85 
  -2  -2  -1   35.04    0.88 
   2  -2   1   35.02    0.91 
  -2   2  -1   34.08    0.90 
   2   2   1   35.62    0.82 
  -2   2  -1   35.89    0.92 
   2   2   1   35.57    0.84 
  -2   2  -1   34.57    0.91 
  -2   2  -1   35.82    0.91 
   3  -2   1    1.12    0.12 
  -3  -2  -1    0.84    0.10 
   3  -2   1    1.15    0.16 
  -3  -2  -1    1.05    0.13 
  -3  -2  -1    0.77    0.10 
  -3  -2  -1    0.83    0.12 
   3  -2   1    0.89    0.14 
  -3  -2  -1    1.65    0.16 
  -3  -2  -1    0.93    0.11 
  -3  -2  -1    0.86    0.14 
  -3  -2  -1    0.82    0.10 
  -3   2  -1    0.92    0.11 
  -3   2  -1    0.96    0.14 
  -3   2  -1    0.82    0.14 
  -3   2  -1    1.14    0.16 
  -3   2  -1    0.81    0.13 
   3   2   1    0.58    0.08 
   3   2   1    0.72    0.09 
  -4  -2  -1    0.39    0.12 
   4  -2   1    0.23    0.07 
  -4  -2  -1    0.21    0.08 
  -4  -2  -1    0.23    0.08 
  -4  -2  -1    0.29    0.07 
  -4  -2  -1    0.14    0.05 
  -4  -2  -1    0.18    0.07 
   4  -2   1    0.21    0.09 
  -4  -2  -1    0.18    0.08 
  -4  -2  -1    0.40    0.07 
   4  -2   1    0.31    0.10 
  -4  -2  -1    0.40    0.07 
  -4   2  -1    0.20    0.09 
  -4   2  -1    0.22    0.09 
  -4   2  -1    0.32    0.09 
   4   2   1    0.17    0.06 
  -4   2  -1    0.15    0.08 
   4   2   1    0.42    0.06 
  -4   2  -1    0.01    0.06 
  -4   2  -1    0.24    0.11 
  -5  -2  -1   12.02    0.35 
  -5  -2  -1   12.42    0.44 
  -5  -2  -1   11.90    0.34 
  -5  -2  -1   11.89    0.41 
   5  -2   1   12.33    0.47 
  -5  -2  -1   12.13    0.35 
  -5  -2  -1   11.93    0.34 
  -5  -2  -1   11.01    0.49 
  -5  -2  -1   12.72    0.42 
   5  -2   1   12.57    0.38 
  -5  -2  -1   11.87    0.40 
  -5   2  -1   11.57    0.44 
  -5   2  -1   11.42    0.44 
  -5   2  -1   11.73    0.45 
  -5   2  -1   11.74    0.45 
   5   2   1   12.49    0.39 
  -5   2  -1   12.23    0.51 
  -6  -2  -1   65.36    1.51 
  -6  -2  -1   64.36    1.37 
   6  -2   1   63.95    1.42 
  -6  -2  -1   62.56    1.38 
  -6  -2  -1   63.49    1.49 
  -6  -2  -1   63.50    1.37 
  -6  -2  -1   64.91    1.54 
   6  -2   1   64.45    1.57 
  -6  -2  -1   62.21    1.65 
  -6  -2  -1   64.48    1.39 
  -6  -2  -1   64.66    1.48 
   6  -2   1   66.03    1.44 
  -6   2  -1   62.98    1.59 
  -6   2  -1   61.68    1.65 
  -6   2  -1   64.88    1.56 
  -6   2  -1   61.72    1.54 
   6   2   1   65.05    1.48 
  -6   2  -1   63.00    1.55 
  -6   2  -1   65.18    1.55 
  -7  -2  -1   29.51    0.80 
  -7  -2  -1   28.68    0.70 
  -7  -2  -1   29.14    0.85 
   7  -2   1   30.12    0.87 
   7  -2   1   29.26    0.72 
  -7  -2  -1   27.85    0.77 
   7  -2   1   28.67    0.74 
  -7  -2  -1   29.42    0.84 
  -7  -2  -1   28.69    0.69 
  -7  -2  -1   29.19    0.97 
  -7  -2  -1   29.55    0.66 
  -7  -2  -1   28.46    0.68 
   7   2   1   30.62    0.81 
  -7   2  -1   30.38    0.87 
  -7   2  -1   29.44    0.85 
  -7   2  -1   29.74    0.98 
  -7   2  -1   28.16    0.91 
  -7   2  -1   29.01    0.87 
  -7   2  -1   29.20    0.86 
  -8  -2  -1   34.58    0.80 
   8  -2   1   34.48    0.82 
  -8  -2  -1   33.63    0.98 
  -8  -2  -1   34.42    0.76 
  -8  -2  -1   34.49    0.81 
  -8  -2  -1   35.19    0.90 
  -8  -2  -1   34.77    0.99 
   8  -2   1   34.08    0.98 
  -8  -2  -1   33.13    0.75 
   8  -2   1   34.91    0.86 
  -8  -2  -1   36.27    0.93 
  -8   2  -1   35.18    0.98 
  -8   2  -1   33.41    1.07 
  -8   2  -1   34.90    0.99 
  -8   2  -1   35.26    1.00 
  -8   2  -1   32.23    1.10 
  -8   2  -1   34.27    0.99 
   8   2   1   33.53    0.93 
  -9  -2  -1   37.53    0.89 
  -9  -2  -1   37.07    1.09 
   9  -2   1   38.79    1.08 
   9  -2   1   38.20    0.88 
  -9  -2  -1   39.20    1.26 
  -9  -2  -1   37.26    1.08 
   9  -2   1   36.96    0.94 
  -9  -2  -1   38.53    1.01 
  -9  -2  -1   38.25    0.97 
  -9  -2  -1   38.50    0.89 
  -9   2  -1   38.21    1.21 
   9   2   1   39.64    1.05 
  -9   2  -1   37.72    1.08 
  -9   2  -1   39.90    1.26 
  -9   2  -1   35.76    1.08 
  -9   2  -1   37.31    1.06 
  -9   2  -1   37.83    1.09 
 -10  -2  -1    1.59    0.13 
 -10  -2  -1    1.96    0.21 
 -10  -2  -1    1.72    0.23 
 -10  -2  -1    1.31    0.22 
 -10  -2  -1    1.77    0.31 
 -10  -2  -1    1.86    0.13 
 -10  -2  -1    2.02    0.19 
  10  -2   1    1.36    0.10 
  10  -2   1    1.56    0.21 
  10  -2   1    1.83    0.18 
 -10   2  -1    1.70    0.29 
 -10   2  -1    1.66    0.30 
  10   2   1    1.27    0.20 
 -10   2  -1    1.53    0.22 
 -10   2  -1    1.49    0.20 
 -10   2  -1    1.85    0.23 
 -10   2  -1    1.60    0.23 
 -11  -2  -1   12.00    0.69 
 -11  -2  -1   12.15    0.39 
  11  -2   1   12.38    0.33 
 -11  -2  -1   13.81    0.61 
 -11  -2  -1   12.92    0.48 
 -11  -2  -1   12.63    0.56 
 -11  -2  -1   11.71    0.43 
  11  -2   1   12.02    0.42 
 -11   2  -1   12.43    0.55 
 -11   2  -1   12.61    0.68 
 -11   2  -1   12.73    0.52 
 -11   2  -1   10.74    0.53 
 -11   2  -1   11.71    0.53 
 -11   2  -1   10.79    0.62 
  11   2   1   11.90    0.52 
 -12  -2  -1    0.79    0.15 
 -12  -2  -1    0.91    0.28 
 -12  -2  -1    0.62    0.19 
 -12  -2  -1    0.66    0.17 
  12  -2   1    0.68    0.13 
 -12  -2  -1    0.85    0.13 
 -12  -2  -1    0.83    0.12 
 -12   2  -1    0.66    0.16 
 -12   2  -1    0.72    0.18 
 -12   2  -1    0.62    0.15 
  12   2   1    1.01    0.20 
 -12   2  -1    1.06    0.26 
 -12   2  -1    0.92    0.21 
 -12   2  -1    0.67    0.22 
 -13  -2  -1    5.81    0.32 
 -13  -2  -1    5.85    0.41 
 -13  -2  -1    6.91    0.55 
 -13  -2  -1    6.34    0.29 
 -13  -2  -1    6.75    0.46 
 -13  -2  -1    6.32    0.28 
  13   2   1    6.29    0.40 
 -13   2  -1    5.84    0.60 
 -13   2  -1    5.98    0.60 
 -13   2  -1    5.85    0.41 
 -13   2  -1    6.24    0.40 
 -13   2  -1    5.57    0.38 
 -13   2  -1    6.30    0.37 
 -14  -2  -1    6.84    0.44 
 -14  -2  -1    6.22    0.29 
 -14  -2  -1    6.64    0.48 
 -14  -2  -1    7.02    0.58 
  14   2   1    6.11    0.42 
 -14   2  -1    6.12    0.38 
 -14   2  -1    6.74    0.44 
 -14   2  -1    5.75    0.42 
 -14   2  -1    5.90    0.40 
 -14   2  -1    6.55    0.65 
 -14   2  -1    7.16    0.69 
 -15  -2  -1    5.16    0.53 
 -15  -2  -1    4.59    0.59 
 -15  -2  -1    4.23    0.44 
 -15  -2  -1    4.16    0.25 
 -15   2  -1    4.16    0.54 
 -15   2  -1    4.54    0.38 
 -15   2  -1    3.93    0.32 
 -15   2  -1    4.65    0.58 
 -15   2  -1    4.69    0.37 
 -15   2  -1    4.47    0.46 
  15   2   1    4.68    0.44 
 -16  -2  -1    6.99    0.49 
 -16  -2  -1    6.23    0.71 
 -16  -2  -1    7.44    0.35 
 -16  -2  -1    6.74    0.53 
 -16   2  -1    6.88    0.72 
 -16   2  -1    6.94    0.71 
 -16   2  -1    6.93    0.50 
 -16   2  -1    7.02    0.48 
 -16   2  -1    7.62    0.44 
  16   2   1    8.49    0.52 
 -16   2  -1    6.32    0.43 
 -17  -2  -1    4.61    0.64 
 -17  -2  -1    6.42    0.64 
 -17   2  -1    5.11    0.39 
 -17   2  -1    5.65    0.68 
  17   2   1    5.40    0.51 
 -17   2  -1    5.70    0.70 
 -17   2  -1    5.16    0.51 
 -18  -2  -1    0.78    0.27 
 -18  -2  -1    0.59    0.33 
 -18   2  -1    1.01    0.36 
 -18   2  -1    0.67    0.20 
 -18   2  -1    0.72    0.24 
 -18   2  -1    0.41    0.28 
 -19  -2  -1    5.36    0.62 
 -19  -2  -1    4.46    0.67 
  19  -2   1    5.03    0.61 
 -19   2  -1    4.42    0.49 
 -19   2  -1    4.66    0.69 
 -19   2  -1    5.73    0.73 
 -19   2  -1    4.82    0.39 
  20  -2   1    7.01    0.74 
 -20  -2  -1    7.70    0.76 
 -20  -2  -1    6.54    0.84 
 -20   2  -1    6.21    0.52 
 -20   2  -1    7.15    0.87 
 -20   2  -1    5.94    0.76 
 -20   2  -1    7.10    0.46 
 -21  -2  -1   -0.02    0.24 
  21  -2   1    0.07    0.26 
 -21  -2  -1    0.30    0.25 
 -21   2  -1   -0.01    0.28 
 -21   2  -1    0.24    0.15 
 -21   2  -1    0.34    0.29 
 -22  -2  -1   11.09    0.82 
 -22  -2  -1   11.37    1.17 
 -22   2  -1   12.74    1.04 
 -22   2  -1   11.77    0.57 
 -22   2  -1   10.78    1.06 
 -23  -2  -1    0.01    0.28 
 -23  -2  -1    0.19    0.26 
 -23   2  -1    0.03    0.12 
 -23   2  -1   -0.04    0.24 
 -23   2  -1    0.13    0.28 
 -24  -2  -1   18.46    1.12 
 -24  -2  -1   17.78    1.31 
 -24   2  -1   18.79    1.32 
 -24   2  -1   19.96    1.26 
 -24   2  -1   19.29    0.62 
 -25  -2  -1    1.02    0.40 
 -25  -2  -1    0.14    0.35 
 -25   2  -1    0.31    0.36 
 -25   2  -1    1.22    0.55 
 -26  -2  -1    7.38    0.90 
 -26  -2  -1    7.66    1.06 
 -26   2  -1    6.98    0.96 
 -26   2  -1    8.99    1.15 
 -27  -2  -1    1.01    0.45 
 -27  -2  -1    1.50    0.56 
 -27   2  -1    0.55    0.40 
 -27   2  -1    1.14    0.53 
 -27  -3   1   -0.36    0.24 
 -27  -3   1    0.12    0.36 
 -27   3   1   -0.04    0.16 
 -27   3   1    0.17    0.36 
 -27   3   1    0.33    0.40 
 -26  -3   1    0.12    0.30 
 -26  -3   1    0.03    0.33 
 -26   3   1    0.40    0.21 
 -26   3   1    0.32    0.45 
 -26   3   1    0.34    0.39 
 -25  -3   1    0.52    0.31 
 -25  -3   1    0.18    0.36 
 -25   3   1    0.75    0.25 
 -25   3   1    0.80    0.45 
 -25   3   1    0.50    0.38 
 -24  -3   1    0.26    0.32 
  24  -3  -1    0.32    0.33 
 -24  -3   1    0.24    0.31 
 -24   3   1    0.21    0.35 
 -24   3   1    0.16    0.19 
 -24   3   1    0.02    0.28 
  23  -3  -1    0.71    0.40 
 -23  -3   1    1.48    0.38 
 -23  -3   1    1.55    0.49 
 -23   3   1    1.76    0.41 
 -23   3   1    1.27    0.45 
 -23   3   1    0.39    0.33 
 -23   3   1    1.09    0.29 
 -22  -3   1    0.78    0.31 
  22  -3  -1    1.03    0.37 
 -22  -3   1    0.98    0.42 
 -22   3   1    0.75    0.30 
 -22   3   1    0.66    0.38 
 -22   3   1    0.85    0.44 
 -22   3   1    0.80    0.26 
 -21  -3   1    1.80    0.40 
  21  -3  -1    1.60    0.39 
 -21  -3   1    1.73    0.48 
 -21   3   1    1.55    0.33 
 -21   3   1    1.22    0.44 
 -21   3   1    1.56    0.37 
 -21   3   1    1.04    0.43 
 -20  -3   1    3.96    0.66 
 -20  -3   1    4.13    0.55 
 -20   3   1    4.28    0.54 
 -20   3   1    5.59    0.74 
 -20   3   1    4.70    0.70 
 -20   3   1    4.57    0.51 
 -19  -3   1   10.17    0.83 
 -19  -3   1    7.61    0.62 
 -19   3   1    7.85    0.57 
 -19   3   1    8.44    0.88 
 -19   3   1    8.97    0.91 
 -19   3   1    8.61    0.63 
 -18  -3   1    1.29    0.33 
 -18  -3   1    0.15    0.29 
 -18  -3   1    0.33    0.21 
 -18   3   1    0.53    0.27 
 -18   3   1    0.79    0.27 
 -18   3   1    1.46    0.43 
  18   3  -1    0.59    0.24 
 -18   3   1    1.10    0.28 
 -18   3   1    0.30    0.27 
 -17  -3   1    0.83    0.19 
 -17  -3   1    0.80    0.27 
 -17  -3   1    1.09    0.36 
 -17  -3   1    1.05    0.28 
 -17   3   1    1.11    0.27 
 -17   3   1    0.93    0.32 
  17   3  -1    1.42    0.29 
 -17   3   1    1.22    0.29 
 -17   3   1    1.07    0.27 
 -17   3   1    0.77    0.30 
 -16  -3   1   31.76    0.76 
 -16  -3   1   32.26    0.77 
 -16  -3   1   30.31    1.18 
 -16  -3   1   29.60    0.96 
 -16  -3   1   30.64    1.37 
 -16  -3   1   30.76    1.16 
 -16   3   1   32.35    1.18 
 -16   3   1   33.53    1.21 
  16   3  -1   29.18    1.11 
 -16   3   1   33.07    1.23 
 -16   3   1   33.07    1.38 
 -16   3   1   31.20    1.34 
 -15  -3   1   42.51    1.03 
 -15  -3   1   42.09    1.41 
 -15  -3   1   42.32    1.61 
  15  -3  -1   42.05    1.15 
 -15  -3   1   41.28    1.37 
 -15  -3   1   42.55    1.19 
 -15  -3   1   41.80    1.01 
 -15   3   1   43.13    1.41 
 -15   3   1   40.93    1.43 
 -15   3   1   41.58    1.56 
 -15   3   1   43.55    1.41 
 -15   3   1   43.40    1.58 
  15   3  -1   43.04    1.36 
 -14  -3   1    2.19    0.17 
 -14  -3   1    2.38    0.24 
  14  -3  -1    2.09    0.24 
 -14  -3   1    2.27    0.18 
 -14  -3   1    3.24    0.30 
 -14  -3   1    2.48    0.43 
 -14  -3   1    2.49    0.37 
 -14  -3   1    2.59    0.36 
 -14   3   1    2.29    0.36 
 -14   3   1    2.30    0.41 
 -14   3   1    2.76    0.35 
  14   3  -1    2.64    0.35 
 -14   3   1    2.53    0.37 
 -14   3   1    2.59    0.41 
 -13  -3   1   49.75    1.19 
 -13  -3   1   48.02    1.45 
  13  -3  -1   47.72    1.28 
 -13  -3   1   48.58    1.67 
 -13  -3   1   49.89    1.27 
 -13  -3   1   50.52    1.53 
 -13  -3   1   48.92    1.22 
 -13  -3   1   49.58    1.22 
 -13  -3   1   50.80    1.32 
 -13   3   1   51.57    1.53 
  13   3  -1   47.41    1.43 
 -13   3   1   48.57    1.54 
 -13   3   1   49.88    1.63 
 -13   3   1   51.45    1.68 
 -13   3   1   49.37    1.51 
 -13   3   1   48.89    1.45 
  12  -3  -1    0.25    0.11 
 -12  -3   1    0.11    0.10 
 -12  -3   1   -0.04    0.08 
 -12  -3   1    0.04    0.08 
 -12  -3   1    0.03    0.11 
 -12  -3   1   -0.13    0.10 
 -12  -3   1   -0.07    0.08 
 -12  -3   1   -0.06    0.13 
 -12  -3   1    0.00    0.06 
  12  -3  -1    0.00    0.07 
 -12  -3   1    0.00    0.08 
 -12   3   1    0.14    0.16 
 -12   3   1   -0.02    0.12 
 -12   3   1    0.02    0.11 
  12   3  -1    0.02    0.11 
 -12   3   1    0.16    0.14 
 -12   3   1    0.22    0.16 
 -12   3   1    0.01    0.12 
  11  -3  -1   24.96    0.92 
 -11  -3   1   24.27    0.84 
  11  -3  -1   24.44    0.69 
 -11  -3   1   25.24    0.72 
  11  -3  -1   24.14    0.75 
 -11  -3   1   24.39    1.01 
 -11  -3   1   24.13    0.92 
 -11  -3   1   24.83    0.70 
 -11  -3   1   24.50    0.77 
 -11  -3   1   24.39    0.73 
 -11  -3   1   25.65    0.75 
 -11   3   1   25.17    0.89 
  11   3  -1   25.87    0.87 
 -11   3   1   24.86    0.92 
 -11   3   1   23.23    0.91 
 -11   3   1   25.47    0.95 
 -11   3   1   24.98    1.02 
 -11   3   1   23.77    0.95 
 -10  -3   1    0.63    0.15 
 -10  -3   1    0.85    0.14 
  10  -3  -1    0.93    0.16 
 -10  -3   1    0.90    0.13 
  10  -3  -1    0.83    0.13 
  10  -3  -1    0.82    0.19 
 -10  -3   1    0.68    0.21 
 -10  -3   1    1.04    0.16 
 -10  -3   1    0.88    0.22 
 -10  -3   1    0.77    0.14 
 -10  -3   1    0.76    0.13 
 -10   3   1    0.87    0.19 
 -10   3   1    0.65    0.16 
 -10   3   1    0.93    0.21 
  10   3  -1    0.71    0.16 
 -10   3   1    0.97    0.24 
 -10   3   1    0.72    0.20 
 -10   3   1    0.40    0.15 
  -9  -3   1  102.99    2.27 
  -9  -3   1   98.82    2.23 
  -9  -3   1  100.38    2.27 
  -9  -3   1  101.73    2.22 
  -9  -3   1   97.48    2.32 
   9  -3  -1   99.46    2.47 
  -9  -3   1   99.33    2.45 
  -9  -3   1  103.27    2.29 
  -9  -3   1  100.82    2.54 
   9  -3  -1  101.56    2.22 
   9  -3  -1  102.52    2.13 
   9  -3  -1   96.84    2.26 
  -9   3   1  103.65    2.48 
  -9   3   1   96.81    2.44 
   9   3  -1   98.67    2.36 
  -9   3   1   98.24    2.46 
  -9   3   1  100.16    2.48 
  -9   3   1   98.41    2.42 
  -9   3   1   99.51    2.54 
  -8  -3   1   42.74    1.05 
  -8  -3   1   41.01    1.09 
   8  -3  -1   40.84    1.25 
  -8  -3   1   41.01    1.10 
   8  -3  -1   43.31    1.06 
  -8  -3   1   41.32    1.10 
   8  -3  -1   42.35    1.25 
   8  -3  -1   40.84    1.09 
  -8  -3   1   41.14    1.27 
  -8  -3   1   43.16    1.24 
   8  -3  -1   41.94    0.98 
  -8  -3   1   40.57    1.06 
  -8   3   1   41.63    1.22 
  -8   3   1   43.26    1.26 
  -8   3   1   44.11    1.25 
  -8   3   1   42.55    1.22 
  -8   3   1   43.98    1.31 
   8   3  -1   41.43    0.98 
  -8   3   1   40.45    1.24 
   8   3  -1   42.39    1.16 
   7  -3  -1    0.50    0.08 
   7  -3  -1    0.81    0.13 
   7  -3  -1    0.73    0.13 
  -7  -3   1    0.76    0.17 
  -7  -3   1    0.64    0.14 
   7  -3  -1    0.53    0.14 
  -7  -3   1    0.68    0.14 
  -7  -3   1    0.84    0.14 
  -7  -3   1    0.40    0.10 
  -7  -3   1    0.50    0.12 
  -7  -3   1    0.64    0.11 
   7  -3  -1    0.55    0.15 
  -7  -3   1    0.75    0.17 
   7   3  -1    0.73    0.14 
  -7   3   1    0.58    0.15 
  -7   3   1    0.75    0.18 
   7   3  -1    0.69    0.11 
  -7   3   1    0.45    0.14 
  -7   3   1    0.75    0.18 
  -6  -3   1    0.90    0.13 
   6  -3  -1    1.01    0.15 
  -6  -3   1    0.77    0.13 
  -6  -3   1    1.00    0.18 
   6  -3  -1    0.82    0.16 
  -6  -3   1    1.07    0.15 
  -6  -3   1    0.83    0.17 
   6  -3  -1    0.83    0.13 
  -6  -3   1    0.71    0.13 
   6  -3  -1    0.89    0.18 
  -6  -3   1    1.52    0.17 
   6  -3  -1    1.28    0.13 
  -6  -3   1    0.93    0.14 
   6   3  -1    1.00    0.16 
  -6   3   1    0.76    0.16 
  -6   3   1    1.50    0.22 
   6   3  -1    1.35    0.15 
  -6   3   1    0.76    0.16 
   5  -3  -1    2.42    0.27 
  -5  -3   1    2.09    0.20 
   5  -3  -1    2.22    0.26 
  -5  -3   1    1.98    0.15 
  -5  -3   1    1.82    0.23 
  -5  -3   1    2.14    0.21 
   5  -3  -1    2.11    0.14 
  -5  -3   1    1.75    0.19 
   5  -3  -1    2.13    0.20 
  -5  -3   1    2.12    0.23 
  -5  -3   1    2.56    0.23 
  -5  -3   1    2.17    0.17 
   5  -3  -1    1.94    0.20 
  -5   3   1    1.95    0.23 
   5   3  -1    1.99    0.20 
   5   3  -1    1.93    0.18 
  -5   3   1    2.14    0.24 
  -5   3   1    1.89    0.24 
   4  -3  -1   13.73    0.47 
  -4  -3   1   13.62    0.50 
  -4  -3   1   12.68    0.47 
  -4  -3   1   14.38    0.49 
   4  -3  -1   14.21    0.48 
   4  -3  -1   14.85    0.57 
  -4  -3   1   13.63    0.53 
   4  -3  -1   14.79    0.43 
  -4  -3   1   14.28    0.45 
  -4  -3   1   14.36    0.50 
  -4  -3   1   14.14    0.50 
   4  -3  -1   14.70    0.56 
  -4  -3   1   13.79    0.48 
   4   3  -1   13.82    0.49 
   4   3  -1   13.74    0.47 
  -4   3   1   14.61    0.53 
  -4   3   1   13.98    0.55 
  -4   3   1   13.66    0.54 
  -3  -3   1   90.47    1.98 
  -3  -3   1   87.36    2.02 
   3  -3  -1   88.30    2.01 
  -3  -3   1   89.52    2.05 
  -3  -3   1   87.98    2.04 
   3  -3  -1   90.09    1.95 
   3  -3  -1   88.86    2.12 
  -3  -3   1   89.27    2.02 
   3  -3  -1   91.30    2.11 
  -3  -3   1   87.95    1.98 
  -3  -3   1   86.88    2.07 
  -3  -3   1   87.31    2.00 
   3   3  -1   89.48    2.01 
   3   3  -1   92.53    2.12 
  -3   3   1   88.91    2.10 
  -3   3   1   89.69    2.04 
  -3   3   1   87.94    2.09 
   3   3  -1   90.89    2.02 
  -3   3   1   90.28    2.09 
   2  -3  -1   84.71    1.92 
   2  -3  -1   83.39    2.01 
  -2  -3   1   83.98    1.98 
  -2  -3   1   85.36    1.86 
   2  -3  -1   85.65    1.89 
  -2  -3   1   84.77    1.97 
   2  -3  -1   83.60    1.94 
  -2  -3   1   83.72    1.91 
  -2  -3   1   84.22    1.94 
  -2  -3   1   82.45    1.95 
   2  -3  -1   86.49    2.01 
  -2  -3   1   88.55    1.91 
   2   3  -1   86.24    1.86 
   2   3  -1   87.00    1.95 
   2   3  -1   87.05    1.93 
  -2   3   1   86.51    1.92 
  -2   3   1   83.67    1.96 
  -2   3   1   87.08    2.01 
   2   3  -1   85.92    1.96 
  -2   3   1   84.37    2.00 
  -1  -3   1  283.72    5.84 
  -1  -3   1  284.88    5.92 
  -1  -3   1  281.76    5.90 
   1  -3  -1  280.92    5.85 
   1  -3  -1  286.77    5.83 
   1  -3  -1  284.58    5.88 
   1  -3  -1  283.58    5.94 
  -1  -3   1  275.72    5.87 
  -1  -3   1  281.68    5.90 
   1  -3  -1  290.94    5.94 
  -1  -3   1  280.18    5.84 
  -1   3   1  287.21    5.93 
  -1   3   1  289.17    5.93 
   1   3  -1  284.98    5.80 
  -1   3   1  287.62    5.80 
  -1   3   1  285.83    5.87 
   1   3  -1  270.52    5.89 
   0  -3  -1   66.49    1.55 
   0  -3   1   63.59    1.56 
   0  -3  -1   64.69    1.52 
   0  -3   1   65.95    1.50 
   0  -3   1   65.76    1.58 
   0  -3  -1   62.23    1.56 
   0  -3  -1   66.71    1.58 
   0  -3   1   65.29    1.59 
   0  -3  -1   65.80    1.52 
   0  -3   1   64.57    1.53 
   0   3  -1   65.01    1.57 
   0   3   1   64.85    1.56 
   0   3  -1   64.29    1.53 
   0   3   1   66.47    1.57 
   0   3   1   63.86    1.51 
   0   3  -1   65.86    1.50 
   0   3   1   67.51    1.44 
   0   3  -1   67.93    1.59 
   1  -3   1   98.68    2.28 
   1  -3   1  101.09    2.23 
  -1  -3  -1  100.63    2.26 
   1  -3   1  101.43    2.19 
  -1  -3  -1  101.59    2.26 
  -1  -3  -1   99.06    2.22 
  -1  -3  -1  101.14    2.26 
   1  -3   1   97.37    2.29 
  -1  -3  -1  101.14    2.23 
  -1   3  -1   99.79    2.22 
   1   3   1  102.96    2.25 
  -1   3  -1  100.49    2.25 
  -1   3  -1  100.84    2.29 
   1   3   1  101.39    2.19 
   1   3   1   99.23    2.25 
  -1   3  -1  100.20    2.29 
  -2  -3  -1  106.50    2.37 
   2  -3   1  106.48    2.33 
  -2  -3  -1  107.58    2.37 
   2  -3   1  108.26    2.46 
   2  -3   1  109.02    2.37 
  -2  -3  -1  108.24    2.39 
   2  -3   1  103.68    2.43 
  -2  -3  -1  107.30    2.40 
  -2  -3  -1  110.71    2.42 
  -2  -3  -1  110.72    2.39 
  -2  -3  -1  106.00    2.38 
  -2   3  -1  104.40    2.41 
  -2   3  -1  104.69    2.44 
   2   3   1  108.24    2.32 
   2   3   1  109.87    2.37 
  -2   3  -1  109.30    2.45 
  -2   3  -1  106.36    2.40 
  -3  -3  -1  205.70    4.32 
   3  -3   1  205.23    4.32 
  -3  -3  -1  209.66    4.37 
   3  -3   1  196.79    4.40 
   3  -3   1  210.24    4.28 
  -3  -3  -1  207.19    4.37 
  -3  -3  -1  208.89    4.36 
  -3  -3  -1  208.57    4.33 
   3  -3   1  212.15    4.43 
  -3  -3  -1  205.84    4.31 
  -3  -3  -1  201.43    4.36 
  -3  -3  -1  205.58    4.31 
  -3   3  -1  204.88    4.40 
  -3   3  -1  200.12    4.39 
   3   3   1  207.75    4.27 
  -3   3  -1  199.77    4.41 
  -3   3  -1  204.41    4.41 
   3   3   1  206.92    4.29 
  -4  -3  -1    1.95    0.15 
  -4  -3  -1    1.50    0.16 
  -4  -3  -1    1.60    0.18 
  -4  -3  -1    1.76    0.19 
  -4  -3  -1    1.54    0.20 
   4  -3   1    1.52    0.16 
  -4  -3  -1    1.67    0.20 
   4  -3   1    1.56    0.21 
   4  -3   1    1.98    0.15 
  -4  -3  -1    1.99    0.19 
   4  -3   1    1.77    0.22 
  -4   3  -1    1.36    0.19 
   4   3   1    1.63    0.16 
  -4   3  -1    1.55    0.22 
  -4   3  -1    1.61    0.20 
  -4   3  -1    1.44    0.20 
   4   3   1    1.69    0.14 
  -5  -3  -1    4.13    0.29 
  -5  -3  -1    4.94    0.27 
  -5  -3  -1    5.03    0.24 
  -5  -3  -1    4.79    0.24 
  -5  -3  -1    4.82    0.24 
   5  -3   1    4.41    0.30 
  -5  -3  -1    4.76    0.28 
  -5  -3  -1    5.19    0.27 
   5  -3   1    5.04    0.24 
   5  -3   1    4.98    0.31 
   5  -3   1    5.01    0.25 
  -5   3  -1    5.08    0.33 
   5   3   1    4.86    0.24 
  -5   3  -1    4.71    0.32 
  -5   3  -1    4.65    0.26 
  -5   3  -1    5.53    0.33 
  -5   3  -1    4.47    0.30 
   5   3   1    4.54    0.20 
  -6  -3  -1   30.93    0.89 
  -6  -3  -1   30.86    1.00 
   6  -3   1   31.26    0.83 
  -6  -3  -1   32.56    0.82 
   6  -3   1   32.01    0.96 
  -6  -3  -1   31.44    0.82 
  -6  -3  -1   32.24    0.81 
  -6  -3  -1   31.28    0.82 
   6  -3   1   31.99    0.82 
  -6  -3  -1   32.25    0.83 
  -6  -3  -1   31.40    0.88 
   6  -3   1   31.29    0.97 
  -6  -3  -1   30.81    0.92 
  -6   3  -1   31.64    0.97 
  -6   3  -1   29.88    1.00 
  -6   3  -1   32.20    0.97 
   6   3   1   32.76    0.85 
  -6   3  -1   30.72    0.92 
   6   3   1   32.12    0.74 
  -7  -3  -1   26.65    0.84 
   7  -3   1   25.89    0.87 
  -7  -3  -1   26.74    0.93 
  -7  -3  -1   25.73    0.70 
   7  -3   1   26.90    0.71 
  -7  -3  -1   25.94    0.71 
  -7  -3  -1   26.23    0.69 
   7  -3   1   26.66    0.73 
  -7  -3  -1   24.95    0.78 
  -7  -3  -1   27.07    0.72 
  -7  -3  -1   25.70    0.78 
  -7  -3  -1   26.70    0.76 
  -7   3  -1   25.72    0.93 
   7   3   1   26.56    0.76 
  -7   3  -1   27.09    0.88 
  -7   3  -1   26.58    0.87 
  -7   3  -1   27.00    0.86 
  -7   3  -1   26.88    0.86 
  -8  -3  -1    8.94    0.44 
   8  -3   1    9.12    0.35 
  -8  -3  -1    8.49    0.33 
  -8  -3  -1    9.30    0.41 
   8  -3   1    8.59    0.46 
  -8  -3  -1    8.91    0.40 
  -8  -3  -1    9.77    0.54 
  -8  -3  -1    8.95    0.33 
  -8  -3  -1    9.50    0.35 
  -8  -3  -1    9.25    0.31 
  -8  -3  -1    9.79    0.41 
  -8  -3  -1    8.50    0.33 
   8  -3   1    9.71    0.35 
   8   3   1    8.89    0.39 
  -8   3  -1    8.66    0.52 
  -8   3  -1    8.28    0.45 
  -8   3  -1    8.86    0.46 
  -8   3  -1    8.84    0.46 
  -8   3  -1    9.76    0.46 
  -8   3  -1    9.22    0.47 
  -9  -3  -1    3.48    0.34 
   9  -3   1    3.76    0.21 
  -9  -3  -1    3.87    0.21 
  -9  -3  -1    3.80    0.26 
  -9  -3  -1    3.72    0.26 
  -9  -3  -1    3.73    0.19 
  -9  -3  -1    3.82    0.43 
   9  -3   1    3.68    0.31 
  -9  -3  -1    3.78    0.27 
   9  -3   1    3.76    0.21 
  -9  -3  -1    3.92    0.21 
  -9  -3  -1    3.51    0.17 
  -9   3  -1    3.97    0.32 
   9   3   1    4.16    0.27 
  -9   3  -1    3.67    0.29 
  -9   3  -1    4.25    0.32 
  -9   3  -1    3.41    0.36 
  -9   3  -1    4.75    0.48 
  -9   3  -1    4.06    0.32 
 -10  -3  -1   43.70    1.15 
 -10  -3  -1   42.64    1.20 
 -10  -3  -1   42.30    1.05 
 -10  -3  -1   44.74    1.26 
 -10  -3  -1   42.64    0.96 
 -10  -3  -1   42.50    1.15 
 -10  -3  -1   41.63    0.98 
 -10  -3  -1   41.33    1.04 
  10  -3   1   42.67    1.04 
 -10  -3  -1   38.77    1.37 
  10  -3   1   42.75    1.27 
  10  -3   1   43.11    1.05 
 -10   3  -1   43.24    1.36 
  10   3   1   42.94    1.17 
 -10   3  -1   42.89    1.28 
 -10   3  -1   40.34    1.39 
 -10   3  -1   43.16    1.25 
 -10   3  -1   43.38    1.28 
 -10   3  -1   42.54    1.27 
 -11  -3  -1   36.29    1.01 
 -11  -3  -1   36.15    0.80 
 -11  -3  -1   35.24    0.92 
  11  -3   1   37.25    0.90 
 -11  -3  -1   35.04    1.02 
  11  -3   1   34.30    1.11 
 -11  -3  -1   34.57    1.29 
 -11  -3  -1   35.44    0.79 
 -11  -3  -1   37.05    1.13 
 -11  -3  -1   34.50    1.09 
  11  -3   1   37.01    0.92 
 -11  -3  -1   35.65    0.92 
 -11   3  -1   34.19    1.28 
 -11   3  -1   36.49    1.16 
 -11   3  -1   35.78    1.15 
 -11   3  -1   34.51    1.23 
  11   3   1   35.18    1.05 
 -11   3  -1   36.72    1.12 
 -11   3  -1   35.41    1.15 
  12  -3   1    9.50    0.34 
 -12  -3  -1    9.83    0.37 
 -12  -3  -1    9.32    0.44 
 -12  -3  -1    9.72    0.65 
 -12  -3  -1    9.27    0.43 
 -12  -3  -1    9.74    0.52 
 -12  -3  -1   10.13    0.53 
  12  -3   1   10.11    0.53 
  12  -3   1   10.03    0.38 
 -12   3  -1   10.27    0.52 
  12   3   1   10.29    0.49 
 -12   3  -1   10.09    0.55 
 -12   3  -1    9.33    0.53 
 -12   3  -1   10.78    0.68 
 -12   3  -1    8.83    0.53 
 -12   3  -1    8.83    0.59 
 -13  -3  -1   61.03    1.41 
 -13  -3  -1   59.04    1.67 
 -13  -3  -1   58.66    1.48 
 -13  -3  -1   56.19    1.50 
 -13  -3  -1   58.73    1.66 
 -13  -3  -1   55.78    1.89 
 -13   3  -1   59.29    1.91 
 -13   3  -1   56.81    1.68 
 -13   3  -1   59.17    1.63 
 -13   3  -1   59.14    1.69 
 -13   3  -1   61.30    1.88 
  13   3   1   60.78    1.60 
 -13   3  -1   57.66    1.68 
 -14  -3  -1    1.29    0.26 
 -14  -3  -1    1.28    0.34 
 -14  -3  -1    1.73    0.30 
 -14  -3  -1    1.65    0.18 
 -14   3  -1    1.47    0.28 
 -14   3  -1    1.67    0.38 
 -14   3  -1    1.96    0.30 
 -14   3  -1    1.89    0.37 
  14   3   1    1.09    0.23 
 -14   3  -1    0.61    0.20 
 -15  -3  -1   23.05    0.96 
 -15  -3  -1   23.61    0.70 
 -15  -3  -1   23.61    1.16 
 -15  -3  -1   26.61    0.97 
 -15   3  -1   24.25    0.95 
 -15   3  -1   23.25    1.15 
  15   3   1   22.80    0.88 
 -15   3  -1   23.37    0.96 
 -15   3  -1   26.15    1.17 
 -15   3  -1   24.32    0.98 
 -16  -3  -1    5.39    0.54 
 -16  -3  -1    6.25    0.47 
 -16  -3  -1    4.74    0.65 
 -16   3  -1    4.46    0.59 
  16   3   1    4.92    0.47 
 -16   3  -1    4.17    0.46 
 -16   3  -1    5.32    0.44 
 -16   3  -1    4.69    0.61 
 -16   3  -1    6.08    0.48 
 -17  -3  -1    7.50    0.56 
 -17  -3  -1    6.90    0.79 
 -17   3  -1    7.84    0.83 
 -17   3  -1    7.47    0.52 
 -17   3  -1    8.84    0.72 
 -17   3  -1    7.54    0.55 
 -18  -3  -1   -0.08    0.19 
 -18  -3  -1    0.14    0.24 
 -18   3  -1    0.18    0.17 
 -18   3  -1    0.22    0.24 
 -18   3  -1    0.10    0.18 
 -18   3  -1    0.04    0.23 
 -19  -3  -1    1.18    0.33 
 -19  -3  -1    0.93    0.38 
 -19   3  -1    1.58    0.43 
 -19   3  -1    0.55    0.24 
 -19   3  -1    1.09    0.40 
 -19   3  -1    0.70    0.23 
 -20  -3  -1    5.12    0.60 
 -20  -3  -1    4.71    0.73 
 -20   3  -1    5.27    0.57 
 -20   3  -1    5.31    0.53 
 -20   3  -1    5.22    0.74 
 -20   3  -1    4.10    0.65 
 -21  -3  -1    1.25    0.38 
  21  -3   1    0.71    0.33 
 -21  -3  -1    1.42    0.46 
 -21   3  -1    0.68    0.24 
 -21   3  -1    1.04    0.31 
 -21   3  -1    0.61    0.35 
 -21   3  -1    0.39    0.35 
  22  -3   1    1.43    0.44 
 -22  -3  -1    2.09    0.47 
 -22  -3  -1    1.24    0.45 
 -22   3  -1    1.23    0.28 
 -22   3  -1    1.06    0.43 
 -22   3  -1    1.52    0.37 
 -22   3  -1    1.67    0.50 
 -23  -3  -1    3.62    0.56 
 -23  -3  -1    4.31    0.78 
 -23   3  -1    2.79    0.38 
 -23   3  -1    2.68    0.61 
 -23   3  -1    3.69    0.70 
 -24  -3  -1    6.99    0.79 
 -24  -3  -1    7.06    0.98 
 -24   3  -1    5.34    0.84 
 -24   3  -1    7.04    0.95 
 -24   3  -1    7.16    0.49 
 -25  -3  -1    0.56    0.32 
 -25  -3  -1    0.11    0.32 
 -25   3  -1    0.13    0.39 
 -25   3  -1    0.06    0.37 
 -25   3  -1    0.61    0.20 
 -26  -3  -1    0.49    0.46 
 -26   3  -1   -0.02    0.34 
 -26   3  -1    0.26    0.15 
 -26   3  -1    0.16    0.40 
 -27  -4   1   13.30    1.42 
 -27   4   1   13.72    1.46 
 -27   4   1   15.58    1.23 
 -27   4   1   15.45    0.83 
 -26  -4   1    2.77    0.70 
 -26   4   1    4.21    0.78 
 -26   4   1    3.96    0.80 
 -26   4   1    3.48    0.49 
 -25  -4   1   24.27    1.57 
 -25   4   1   22.82    1.43 
 -25   4   1   21.93    1.05 
 -25   4   1   24.48    1.55 
 -24  -4   1    1.04    0.37 
 -24  -4   1    1.29    0.48 
  24  -4  -1    0.42    0.34 
 -24   4   1    0.72    0.42 
 -24   4   1    1.04    0.38 
 -24   4   1    0.88    0.30 
 -24   4   1    0.35    0.37 
 -23  -4   1   47.67    2.14 
 -23  -4   1   47.78    1.77 
  23  -4  -1   48.20    1.96 
 -23   4   1   48.53    1.81 
 -23   4   1   44.79    2.00 
 -23   4   1   45.28    1.65 
 -23   4   1   43.67    2.03 
 -22  -4   1    2.93    0.51 
 -22  -4   1    3.70    0.70 
 -22   4   1    2.80    0.61 
 -22   4   1    2.40    0.44 
 -22   4   1    2.30    0.54 
 -22   4   1    3.51    0.56 
 -21  -4   1   35.18    1.40 
 -21  -4   1   34.41    1.70 
 -21   4   1   35.57    1.68 
 -21   4   1   36.15    1.46 
 -21   4   1   32.88    1.35 
 -21   4   1   31.47    1.57 
 -20  -4   1    1.78    0.38 
 -20  -4   1    1.49    0.45 
 -20   4   1    1.17    0.40 
 -20   4   1    1.72    0.37 
 -20   4   1    1.37    0.36 
 -20   4   1    1.08    0.41 
 -19  -4   1   62.32    2.30 
 -19  -4   1   66.36    1.98 
 -19   4   1   63.08    2.28 
 -19   4   1   62.88    2.05 
 -19   4   1   58.47    2.21 
 -19   4   1   61.74    1.98 
 -18  -4   1   18.29    0.88 
 -18  -4   1   18.09    1.09 
 -18  -4   1   16.51    0.88 
 -18   4   1   16.08    0.91 
 -18   4   1   17.34    1.06 
 -18   4   1   18.30    1.08 
 -18   4   1   17.37    0.91 
 -18   4   1   19.29    0.97 
 -17  -4   1   44.24    1.53 
 -17  -4   1   42.15    1.26 
 -17  -4   1   45.51    1.48 
 -17  -4   1   44.16    1.75 
 -17   4   1   43.98    1.57 
  17   4  -1   44.41    1.44 
 -17   4   1   41.44    1.52 
 -17   4   1   47.01    1.60 
 -17   4   1   43.26    1.70 
 -17   4   1   41.72    1.70 
 -16  -4   1   18.19    1.04 
 -16  -4   1   18.41    0.71 
 -16  -4   1   18.34    0.54 
 -16  -4   1   18.47    0.83 
 -16  -4   1   18.36    0.89 
 -16  -4   1   18.54    0.52 
 -16   4   1   19.15    0.92 
  16   4  -1   17.02    0.80 
 -16   4   1   17.78    1.01 
 -16   4   1   17.98    0.91 
 -16   4   1   18.85    1.01 
 -16   4   1   18.73    0.91 
 -15  -4   1   12.21    0.45 
 -15  -4   1   10.96    0.62 
  15  -4  -1   12.83    0.56 
 -15  -4   1   12.56    0.43 
 -15  -4   1   14.10    0.86 
 -15  -4   1   13.27    0.57 
 -15  -4   1   12.55    0.71 
 -15   4   1   13.11    0.74 
 -15   4   1   13.57    0.75 
  15   4  -1   12.68    0.65 
 -15   4   1   10.64    0.76 
 -15   4   1   12.17    0.73 
 -15   4   1   12.01    0.78 
 -14  -4   1    3.57    0.25 
 -14  -4   1    2.52    0.44 
 -14  -4   1    3.73    0.35 
 -14  -4   1    3.34    0.22 
 -14  -4   1    3.69    0.45 
 -14  -4   1    3.62    0.41 
  14  -4  -1    3.28    0.33 
 -14  -4   1    3.58    0.34 
 -14   4   1    3.75    0.46 
 -14   4   1    2.95    0.45 
 -14   4   1    3.88    0.53 
  14   4  -1    2.88    0.36 
 -14   4   1    4.04    0.49 
 -14   4   1    3.78    0.47 
 -13  -4   1   67.78    1.70 
 -13  -4   1   66.41    2.06 
 -13  -4   1   66.42    1.58 
 -13  -4   1   65.42    1.63 
 -13  -4   1   65.28    1.91 
 -13  -4   1   65.91    1.70 
  13  -4  -1   63.97    1.69 
 -13  -4   1   65.87    1.62 
  13  -4  -1   67.08    1.94 
 -13   4   1   67.96    1.97 
 -13   4   1   65.54    1.99 
  13   4  -1   66.48    1.81 
 -13   4   1   68.05    2.09 
 -13   4   1   65.76    1.96 
 -13   4   1   68.00    1.96 
  12  -4  -1    7.99    0.55 
  12  -4  -1    8.32    0.38 
 -12  -4   1    7.64    0.36 
 -12  -4   1    8.47    0.54 
 -12  -4   1    7.90    0.42 
 -12  -4   1    7.88    0.39 
 -12  -4   1    7.60    0.57 
 -12  -4   1    7.71    0.42 
  12  -4  -1    8.83    0.44 
 -12  -4   1    8.29    0.40 
  12   4  -1    7.99    0.48 
 -12   4   1    8.89    0.58 
 -12   4   1    8.15    0.59 
 -12   4   1    8.30    0.56 
 -12   4   1    8.33    0.55 
 -12   4   1    7.88    0.55 
 -11  -4   1   73.82    1.86 
 -11  -4   1   75.24    1.79 
  11  -4  -1   75.30    2.09 
 -11  -4   1   75.48    1.81 
 -11  -4   1   74.60    1.83 
 -11  -4   1   75.50    2.06 
  11  -4  -1   75.11    1.69 
  11  -4  -1   77.22    1.81 
  11  -4  -1   75.64    1.87 
 -11  -4   1   74.91    1.87 
 -11  -4   1   75.45    2.15 
 -11   4   1   73.53    2.07 
 -11   4   1   76.34    2.10 
 -11   4   1   73.27    2.02 
 -11   4   1   76.68    2.19 
  11   4  -1   74.51    1.94 
 -11   4   1   78.53    2.10 
 -11   4   1   77.40    2.11 
 -10  -4   1    1.90    0.24 
  10  -4  -1    1.78    0.30 
 -10  -4   1    1.56    0.22 
 -10  -4   1    1.89    0.24 
 -10  -4   1    1.99    0.22 
 -10  -4   1    1.23    0.27 
  10  -4  -1    1.22    0.19 
  10  -4  -1    1.47    0.20 
  10  -4  -1    1.79    0.18 
 -10  -4   1    1.41    0.18 
 -10  -4   1    1.25    0.25 
  10  -4  -1    1.60    0.30 
  10   4  -1    1.79    0.25 
 -10   4   1    1.51    0.29 
 -10   4   1    1.45    0.25 
 -10   4   1    1.77    0.29 
 -10   4   1    1.64    0.30 
 -10   4   1    1.88    0.29 
 -10   4   1    1.37    0.27 
  -9  -4   1   23.10    0.72 
   9  -4  -1   23.37    0.64 
  -9  -4   1   22.42    0.76 
  -9  -4   1   22.63    0.90 
  -9  -4   1   22.59    0.75 
   9  -4  -1   22.58    0.91 
  -9  -4   1   22.54    0.71 
  -9  -4   1   23.59    0.77 
   9  -4  -1   22.66    0.72 
  -9  -4   1   22.71    0.87 
  -9  -4   1   23.51    0.77 
   9  -4  -1   23.27    0.76 
   9  -4  -1   21.66    0.88 
   9   4  -1   22.35    0.63 
  -9   4   1   23.21    0.90 
  -9   4   1   20.93    0.88 
   9   4  -1   22.96    0.79 
  -9   4   1   23.58    0.90 
  -9   4   1   21.71    0.91 
  -9   4   1   22.96    0.85 
  -8  -4   1    2.35    0.30 
  -8  -4   1    2.55    0.26 
  -8  -4   1    2.22    0.31 
  -8  -4   1    2.67    0.28 
   8  -4  -1    2.53    0.26 
   8  -4  -1    2.00    0.30 
   8  -4  -1    2.16    0.30 
  -8  -4   1    2.32    0.24 
  -8  -4   1    2.21    0.23 
   8  -4  -1    2.35    0.17 
  -8  -4   1    2.91    0.28 
   8  -4  -1    2.71    0.27 
  -8  -4   1    2.13    0.27 
  -8   4   1    1.82    0.29 
   8   4  -1    2.43    0.18 
  -8   4   1    2.89    0.34 
  -8   4   1    2.44    0.35 
   8   4  -1    2.35    0.27 
   7  -4  -1   37.24    0.94 
  -7  -4   1   36.62    1.03 
  -7  -4   1   37.02    1.06 
   7  -4  -1   35.34    1.02 
  -7  -4   1   35.85    1.06 
  -7  -4   1   36.05    1.05 
  -7  -4   1   38.98    1.16 
  -7  -4   1   38.00    1.01 
   7  -4  -1   39.32    1.06 
  -7  -4   1   35.99    1.14 
  -7  -4   1   36.37    1.07 
   7  -4  -1   36.54    1.20 
   7  -4  -1   37.17    1.19 
   7   4  -1   35.79    1.05 
  -7   4   1   35.88    1.16 
  -7   4   1   37.10    1.19 
  -7   4   1   36.21    1.17 
   7   4  -1   37.50    0.98 
  -6  -4   1   19.87    0.69 
   6  -4  -1   20.98    0.68 
  -6  -4   1   20.10    0.68 
   6  -4  -1   19.43    0.78 
   6  -4  -1   20.00    0.60 
  -6  -4   1   18.92    0.68 
  -6  -4   1   20.20    0.72 
  -6  -4   1   19.94    0.64 
  -6  -4   1   19.31    0.66 
  -6  -4   1   18.69    0.68 
  -6  -4   1   20.02    0.75 
   6  -4  -1   19.18    0.66 
   6  -4  -1   20.07    0.78 
   6   4  -1   20.95    0.69 
  -6   4   1   18.73    0.75 
  -6   4   1   19.90    0.78 
  -6   4   1   21.12    0.78 
   6   4  -1   20.67    0.64 
   5  -4  -1   17.21    0.61 
   5  -4  -1   18.74    0.74 
   5  -4  -1   18.16    0.71 
  -5  -4   1   17.94    0.63 
   5  -4  -1   17.08    0.55 
  -5  -4   1   16.95    0.62 
  -5  -4   1   17.91    0.62 
   5  -4  -1   17.48    0.61 
  -5  -4   1   17.15    0.63 
  -5  -4   1   16.85    0.63 
  -5  -4   1   17.21    0.63 
  -5  -4   1   17.18    0.58 
  -5  -4   1   17.50    0.68 
  -5   4   1   16.72    0.69 
   5   4  -1   17.55    0.61 
  -5   4   1   18.35    0.72 
  -5   4   1   17.36    0.67 
   5   4  -1   18.28    0.60 
  -4  -4   1   64.42    1.60 
  -4  -4   1   62.40    1.58 
  -4  -4   1   61.25    1.61 
   4  -4  -1   63.96    1.70 
  -4  -4   1   64.39    1.66 
   4  -4  -1   66.04    1.52 
  -4  -4   1   63.05    1.55 
  -4  -4   1   60.55    1.58 
   4  -4  -1   64.76    1.59 
  -4  -4   1   62.53    1.61 
   4  -4  -1   63.22    1.71 
  -4  -4   1   63.80    1.54 
   4  -4  -1   65.23    1.59 
  -4   4   1   64.19    1.67 
   4   4  -1   64.66    1.58 
   4   4  -1   64.17    1.58 
  -4   4   1   66.79    1.71 
  -4   4   1   65.33    1.63 
  -4   4   1   63.69    1.69 
   3  -4  -1   69.04    1.64 
   3  -4  -1   68.09    1.69 
  -3  -4   1   67.88    1.75 
   3  -4  -1   69.91    1.81 
  -3  -4   1   73.64    1.76 
  -3  -4   1   70.28    1.63 
  -3  -4   1   71.00    1.72 
  -3  -4   1   69.84    1.73 
  -3  -4   1   71.28    1.76 
  -3  -4   1   71.20    1.70 
  -3  -4   1   69.16    1.67 
   3  -4  -1   69.55    1.71 
   3  -4  -1   70.58    1.82 
   3   4  -1   68.52    1.71 
  -3   4   1   72.21    1.80 
   3   4  -1   69.54    1.72 
  -3   4   1   69.10    1.76 
   3   4  -1   69.85    1.69 
  -3   4   1   67.35    1.79 
  -3   4   1   72.15    1.71 
   2  -4  -1   19.56    0.66 
   2  -4  -1   21.23    0.76 
  -2  -4   1   19.38    0.70 
   2  -4  -1   18.95    0.72 
  -2  -4   1   21.28    0.72 
  -2  -4   1   21.59    0.70 
  -2  -4   1   20.33    0.65 
  -2  -4   1   20.29    0.70 
  -2  -4   1   21.37    0.68 
   2  -4  -1   20.80    0.69 
   2  -4  -1   20.90    0.64 
   2   4  -1   20.46    0.67 
   2   4  -1   21.10    0.61 
  -2   4   1   20.37    0.64 
  -2   4   1   20.47    0.73 
   2   4  -1   21.56    0.71 
  -2   4   1   20.94    0.70 
  -2   4   1   22.09    0.75 
   2   4  -1   21.22    0.71 
   1  -4  -1   21.33    0.67 
  -1  -4   1   23.19    0.76 
  -1  -4   1   22.65    0.76 
  -1  -4   1   20.60    0.70 
  -1  -4   1   21.64    0.74 
   1  -4  -1   21.76    0.70 
   1  -4  -1   20.91    0.75 
   1  -4  -1   23.72    0.78 
   1  -4  -1   21.94    0.72 
  -1  -4   1   21.35    0.68 
  -1  -4   1   22.33    0.69 
  -1   4   1   22.40    0.76 
   1   4  -1   22.03    0.74 
   1   4  -1   21.46    0.73 
   1   4  -1   22.83    0.65 
  -1   4   1   21.10    0.74 
  -1   4   1   21.42    0.64 
   1   4  -1   22.47    0.70 
  -1   4   1   22.26    0.71 
   0  -4  -1    0.81    0.17 
   0  -4  -1    0.46    0.13 
   0  -4   1    0.56    0.13 
   0  -4   1    0.33    0.12 
   0  -4   1    0.34    0.12 
   0  -4   1    0.61    0.15 
   0  -4  -1    0.60    0.14 
   0  -4   1    0.43    0.14 
   0  -4   1    0.38    0.11 
   0  -4  -1    0.50    0.12 
   0   4   1    0.57    0.12 
   0   4   1    0.52    0.14 
   0   4   1    0.43    0.14 
   0   4   1    0.62    0.11 
   0   4  -1    0.62    0.13 
   0   4  -1    0.42    0.13 
   0   4  -1    0.43    0.12 
   0   4  -1    0.52    0.14 
   1  -4   1    0.64    0.15 
   1  -4   1    0.64    0.17 
   1  -4   1    0.82    0.15 
  -1  -4  -1    1.05    0.17 
  -1  -4  -1    0.76    0.15 
   1  -4   1    0.67    0.14 
   1  -4   1    0.68    0.16 
  -1  -4  -1    0.95    0.17 
  -1  -4  -1    0.98    0.18 
  -1  -4  -1    0.64    0.16 
  -1   4  -1    0.66    0.16 
  -1   4  -1    0.81    0.16 
   1   4   1    1.04    0.18 
  -1   4  -1    1.12    0.18 
  -1   4  -1    0.64    0.16 
   1   4   1    0.94    0.16 
   1   4   1    0.75    0.16 
   1   4   1    0.97    0.12 
   2  -4   1   56.39    1.52 
  -2  -4  -1   56.42    1.47 
  -2  -4  -1   54.90    1.42 
   2  -4   1   57.30    1.39 
  -2  -4  -1   56.25    1.46 
  -2  -4  -1   56.62    1.46 
  -2  -4  -1   56.99    1.45 
  -2  -4  -1   56.49    1.46 
  -2  -4  -1   57.21    1.45 
   2  -4   1   56.17    1.43 
   2  -4   1   56.24    1.51 
   2   4   1   59.68    1.29 
  -2   4  -1   57.89    1.45 
  -2   4  -1   55.46    1.50 
   2   4   1   55.54    1.44 
  -2   4  -1   57.37    1.51 
   2   4   1   57.99    1.44 
   2   4   1   56.49    1.38 
  -3  -4  -1    1.67    0.21 
   3  -4   1    1.45    0.18 
   3  -4   1    1.39    0.22 
  -3  -4  -1    1.10    0.18 
  -3  -4  -1    1.27    0.18 
  -3  -4  -1    1.25    0.20 
   3  -4   1    1.47    0.19 
  -3  -4  -1    1.05    0.17 
  -3  -4  -1    1.18    0.17 
  -3  -4  -1    1.21    0.19 
   3  -4   1    1.43    0.23 
   3   4   1    1.21    0.17 
  -3   4  -1    1.28    0.22 
  -3   4  -1    1.48    0.23 
  -3   4  -1    1.38    0.23 
  -3   4  -1    1.70    0.23 
   3   4   1    1.62    0.18 
  -4  -4  -1   27.58    0.84 
  -4  -4  -1   28.50    0.85 
   4  -4   1   27.77    0.92 
   4  -4   1   28.10    0.83 
   4  -4   1   27.36    0.93 
   4  -4   1   30.21    0.80 
  -4  -4  -1   28.58    0.84 
  -4  -4  -1   27.81    0.88 
  -4  -4  -1   28.60    0.84 
  -4  -4  -1   28.22    0.88 
  -4  -4  -1   28.94    0.88 
  -4   4  -1   27.71    0.92 
  -4   4  -1   28.36    0.93 
  -4   4  -1   25.99    0.90 
   4   4   1   28.05    0.79 
  -4   4  -1   27.95    0.91 
   4   4   1   29.47    0.82 
  -5  -4  -1   57.07    1.39 
  -5  -4  -1   53.45    1.44 
   5  -4   1   55.47    1.53 
  -5  -4  -1   53.47    1.36 
   5  -4   1   56.32    1.33 
  -5  -4  -1   55.38    1.38 
   5  -4   1   55.40    1.51 
  -5  -4  -1   54.31    1.43 
  -5  -4  -1   53.33    1.45 
  -5  -4  -1   53.15    1.39 
   5  -4   1   55.01    1.38 
   5   4   1   53.02    1.33 
  -5   4  -1   52.02    1.49 
  -5   4  -1   51.17    1.49 
  -5   4  -1   54.27    1.50 
  -5   4  -1   53.77    1.51 
   5   4   1   54.61    1.32 
  -6  -4  -1   86.82    2.17 
  -6  -4  -1   88.25    2.15 
  -6  -4  -1   88.31    2.08 
  -6  -4  -1   89.86    2.07 
   6  -4   1   93.29    2.04 
  -6  -4  -1   91.02    2.08 
  -6  -4  -1   91.43    2.24 
   6  -4   1   93.42    2.26 
   6  -4   1   90.68    2.09 
  -6  -4  -1   88.44    2.11 
   6  -4   1   89.62    2.27 
  -6   4  -1   87.86    2.25 
  -6   4  -1   91.28    2.25 
   6   4   1   89.14    2.00 
  -6   4  -1   89.75    2.11 
  -6   4  -1   87.73    2.28 
   6   4   1   88.04    2.06 
   7  -4   1    0.72    0.19 
  -7  -4  -1    0.49    0.12 
  -7  -4  -1    0.09    0.10 
  -7  -4  -1    0.28    0.10 
  -7  -4  -1    0.29    0.11 
   7  -4   1    0.18    0.09 
  -7  -4  -1    0.20    0.09 
  -7  -4  -1    0.25    0.13 
   7  -4   1    0.39    0.12 
   7  -4   1    0.63    0.19 
  -7  -4  -1    0.19    0.12 
   7   4   1    0.24    0.10 
  -7   4  -1    0.18    0.13 
  -7   4  -1    0.19    0.11 
  -7   4  -1    0.46    0.17 
  -7   4  -1    0.29    0.15 
   7   4   1    0.16    0.07 
  -8  -4  -1   -0.02    0.06 
   8  -4   1   -0.03    0.10 
  -8  -4  -1    0.00    0.07 
   8  -4   1    0.13    0.09 
  -8  -4  -1    0.05    0.10 
  -8  -4  -1    0.06    0.08 
   8  -4   1   -0.02    0.07 
  -8  -4  -1    0.08    0.12 
  -8  -4  -1   -0.01    0.09 
  -8  -4  -1    0.05    0.09 
   8  -4   1    0.03    0.11 
  -8   4  -1    0.04    0.09 
  -8   4  -1   -0.11    0.11 
  -8   4  -1   -0.07    0.09 
  -8   4  -1    0.01    0.10 
  -8   4  -1   -0.08    0.08 
   8   4   1   -0.02    0.08 
   9  -4   1    8.87    0.37 
  -9  -4  -1    9.50    0.50 
   9  -4   1    8.73    0.52 
  -9  -4  -1    9.57    0.57 
  -9  -4  -1    7.94    0.43 
  -9  -4  -1    8.75    0.36 
  -9  -4  -1    8.96    0.38 
  -9  -4  -1    8.78    0.39 
   9  -4   1    9.06    0.40 
  -9  -4  -1    8.66    0.43 
  -9   4  -1    8.51    0.56 
  -9   4  -1    9.76    0.53 
  -9   4  -1    8.89    0.51 
  -9   4  -1    8.38    0.48 
   9   4   1    9.57    0.43 
  -9   4  -1    8.94    0.50 
  -9   4  -1    9.26    0.53 
 -10  -4  -1    0.83    0.20 
 -10  -4  -1    0.71    0.12 
 -10  -4  -1    0.78    0.17 
 -10  -4  -1    0.83    0.24 
  10  -4   1    0.67    0.14 
 -10  -4  -1    0.99    0.15 
  10  -4   1    0.78    0.14 
 -10  -4  -1    0.82    0.17 
 -10  -4  -1    0.86    0.15 
  10  -4   1    0.96    0.23 
 -10  -4  -1    0.79    0.19 
 -10  -4  -1    0.88    0.16 
 -10   4  -1    0.61    0.21 
  10   4   1    1.00    0.18 
 -10   4  -1    0.98    0.22 
 -10   4  -1    1.00    0.23 
 -10   4  -1    1.01    0.27 
 -10   4  -1    0.65    0.20 
 -10   4  -1    0.85    0.19 
 -11  -4  -1   35.14    1.06 
 -11  -4  -1   34.85    0.89 
  11  -4   1   34.51    0.93 
 -11  -4  -1   36.80    1.09 
  11  -4   1   36.55    1.23 
 -11  -4  -1   35.71    0.92 
  11  -4   1   35.36    0.97 
 -11  -4  -1   36.61    1.18 
 -11  -4  -1   35.90    1.32 
 -11  -4  -1   34.89    0.97 
 -11  -4  -1   35.43    1.07 
 -11   4  -1   36.58    1.21 
 -11   4  -1   34.48    1.21 
 -11   4  -1   34.00    1.22 
  11   4   1   37.12    1.07 
 -11   4  -1   37.28    1.36 
 -11   4  -1   34.73    1.17 
 -11   4  -1   35.13    1.21 
 -12  -4  -1   10.28    0.51 
 -12  -4  -1   11.33    0.52 
 -12  -4  -1   11.30    0.54 
  12  -4   1   11.24    0.44 
  12  -4   1    9.17    0.58 
 -12  -4  -1   10.75    0.35 
 -12  -4  -1   10.23    0.57 
 -12  -4  -1   10.74    0.70 
  12  -4   1   11.10    0.42 
 -12  -4  -1   10.78    0.37 
 -12  -4  -1   10.67    0.43 
 -12   4  -1   11.78    0.68 
 -12   4  -1   10.77    0.62 
 -12   4  -1    9.93    0.61 
 -12   4  -1   10.29    0.69 
 -12   4  -1   10.85    0.61 
  12   4   1   10.80    0.52 
 -13  -4  -1   10.10    0.51 
 -13  -4  -1   11.14    0.56 
 -13  -4  -1   10.09    0.71 
 -13  -4  -1   11.41    0.45 
 -13  -4  -1   11.39    0.53 
 -13  -4  -1   11.09    0.60 
 -13   4  -1    9.81    0.61 
 -13   4  -1   10.63    0.72 
 -13   4  -1   10.97    0.63 
 -13   4  -1   10.38    0.62 
 -13   4  -1   10.26    0.68 
  13   4   1   11.27    0.54 
 -14  -4  -1    1.30    0.34 
 -14  -4  -1    1.71    0.29 
 -14  -4  -1    1.53    0.20 
 -14  -4  -1    1.68    0.31 
 -14   4  -1    1.12    0.28 
 -14   4  -1    0.98    0.27 
 -14   4  -1    1.64    0.36 
  14   4   1    1.18    0.24 
 -14   4  -1    1.85    0.33 
 -14   4  -1    1.44    0.35 
 -15  -4  -1   22.72    0.92 
 -15  -4  -1   21.73    0.92 
 -15  -4  -1   22.75    0.71 
 -15  -4  -1   24.06    1.18 
 -15   4  -1   23.15    1.00 
 -15   4  -1   22.75    1.11 
 -15   4  -1   22.15    1.14 
 -15   4  -1   23.58    1.01 
 -15   4  -1   23.61    1.00 
  15   4   1   23.71    0.88 
 -16  -4  -1    7.26    0.78 
 -16  -4  -1    6.55    0.49 
 -16  -4  -1    5.80    0.47 
 -16   4  -1    6.70    0.54 
 -16   4  -1    6.01    0.59 
 -16   4  -1    6.43    0.70 
 -16   4  -1    8.25    0.85 
 -16   4  -1    6.64    0.55 
 -17  -4  -1   36.11    1.58 
 -17  -4  -1   33.82    1.25 
 -17   4  -1   33.49    1.30 
 -17   4  -1   36.77    1.56 
 -17   4  -1   34.89    1.34 
 -17   4  -1   35.01    1.50 
 -18  -4  -1    2.87    0.56 
 -18  -4  -1    2.68    0.42 
 -18   4  -1    2.56    0.43 
 -18   4  -1    2.74    0.43 
 -18   4  -1    3.56    0.60 
 -18   4  -1    3.01    0.55 
 -19  -4  -1   12.68    0.76 
 -19  -4  -1   12.70    0.97 
 -19   4  -1   11.85    0.91 
 -19   4  -1   14.74    1.01 
 -19   4  -1   14.52    0.84 
 -19   4  -1   12.82    0.76 
 -20  -4  -1    4.64    0.58 
 -20  -4  -1    2.55    0.56 
 -20   4  -1    3.95    0.70 
 -20   4  -1    4.15    0.51 
 -20   4  -1    2.42    0.57 
 -20   4  -1    3.23    0.50 
 -21  -4  -1   31.36    1.65 
 -21  -4  -1   32.09    1.34 
 -21   4  -1   34.10    1.66 
 -21   4  -1   34.36    1.32 
 -21   4  -1   33.70    1.40 
 -21   4  -1   34.35    1.67 
 -22  -4  -1    0.53    0.36 
 -22  -4  -1    1.50    0.40 
 -22   4  -1    1.19    0.32 
 -22   4  -1    1.18    0.49 
 -22   4  -1    1.45    0.38 
 -22   4  -1    0.70    0.38 
 -23  -4  -1   25.01    1.53 
 -23   4  -1   24.18    1.49 
 -23   4  -1   25.44    1.48 
 -23   4  -1   28.58    1.30 
 -23   4  -1   24.58    1.10 
 -24  -4  -1   -0.19    0.31 
 -24   4  -1    0.11    0.19 
 -24   4  -1   -0.06    0.36 
 -24   4  -1   -0.13    0.33 
 -25  -4  -1   13.32    1.38 
 -25   4  -1   15.59    1.27 
 -25   4  -1   16.86    1.28 
 -25   4  -1   14.98    0.79 
 -26  -4  -1    0.50    0.46 
 -26   4  -1    1.17    0.49 
 -26   4  -1    0.97    0.52 
 -26   4  -1    0.81    0.26 
 -26  -5   1    0.51    0.42 
 -26   5   1    0.04    0.34 
 -26   5   1    0.49    0.43 
 -26   5   1    0.35    0.26 
 -25  -5   1    0.60    0.47 
  25  -5  -1    0.52    0.42 
 -25   5   1    0.03    0.26 
 -25   5   1    0.88    0.41 
 -25   5   1    0.09    0.28 
 -25   5   1    0.16    0.39 
  24  -5  -1    0.41    0.40 
 -24  -5   1    1.07    0.49 
 -24   5   1    0.93    0.33 
 -24   5   1    0.62    0.39 
 -24   5   1    0.69    0.41 
 -24   5   1    0.28    0.32 
 -23  -5   1    0.80    0.41 
 -23   5   1    0.83    0.45 
 -23   5   1    0.37    0.37 
 -23   5   1    0.26    0.32 
 -23   5   1    0.17    0.25 
 -22  -5   1    0.41    0.40 
 -22   5   1    0.43    0.32 
 -22   5   1   -0.27    0.28 
 -22   5   1    0.13    0.26 
 -22   5   1    0.38    0.30 
 -21  -5   1    0.64    0.38 
 -21   5   1    0.54    0.28 
 -21   5   1   -0.32    0.24 
 -21   5   1    0.03    0.22 
 -21   5   1    0.00    0.27 
 -20  -5   1    0.30    0.34 
 -20   5   1    0.37    0.32 
 -20   5   1    0.21    0.26 
 -20   5   1    0.17    0.28 
 -20   5   1   -0.02    0.22 
 -19  -5   1    2.65    0.55 
 -19   5   1    3.47    0.54 
 -19   5   1    2.92    0.51 
 -19   5   1    3.47    0.60 
 -19   5   1    2.23    0.51 
 -18  -5   1    9.99    0.71 
 -18  -5   1    9.32    0.94 
 -18   5   1    9.95    0.73 
 -18   5   1    8.46    0.69 
 -18   5   1    8.75    0.70 
 -18   5   1    8.14    0.90 
 -18   5   1   10.33    0.82 
 -17  -5   1    8.82    0.33 
 -17  -5   1    8.65    0.34 
 -17  -5   1    8.91    0.49 
 -17  -5   1    8.66    0.87 
 -17  -5   1    8.63    0.64 
 -17   5   1    7.38    0.63 
 -17   5   1    8.08    0.85 
 -17   5   1    7.50    0.74 
 -17   5   1    9.14    0.88 
 -17   5   1    9.26    0.69 
  16  -5  -1    4.22    0.41 
 -16  -5   1    4.14    0.39 
 -16  -5   1    3.90    0.26 
 -16  -5   1    4.00    0.25 
 -16  -5   1    3.41    0.46 
 -16  -5   1    3.89    0.59 
 -16   5   1    3.85    0.54 
  16   5  -1    4.72    0.49 
 -16   5   1    4.19    0.61 
 -16   5   1    4.01    0.53 
 -16   5   1    4.03    0.54 
 -16   5   1    4.80    0.58 
 -15  -5   1    4.02    0.38 
 -15  -5   1    3.69    0.55 
 -15  -5   1    3.06    0.23 
 -15  -5   1    3.55    0.46 
  15  -5  -1    3.86    0.40 
 -15  -5   1    3.62    0.27 
 -15   5   1    3.76    0.52 
 -15   5   1    3.30    0.51 
  15   5  -1    2.64    0.37 
 -15   5   1    3.18    0.47 
 -15   5   1    2.80    0.50 
 -15   5   1    4.11    0.53 
 -14  -5   1   32.45    1.23 
 -14  -5   1   33.15    1.06 
 -14  -5   1   32.97    1.36 
 -14  -5   1   32.84    1.08 
  14  -5  -1   33.63    1.08 
 -14  -5   1   32.27    0.99 
 -14  -5   1   33.45    0.94 
 -14   5   1   30.24    1.27 
 -14   5   1   30.13    1.34 
  14   5  -1   31.31    1.11 
 -14   5   1   33.72    1.32 
 -14   5   1   33.47    1.31 
 -14   5   1   32.81    1.29 
 -13  -5   1   41.74    1.52 
 -13  -5   1   41.38    1.24 
 -13  -5   1   40.14    1.11 
 -13  -5   1   40.17    1.16 
  13  -5  -1   40.30    1.22 
 -13  -5   1   40.19    1.16 
 -13  -5   1   37.71    1.19 
 -13  -5   1   36.76    1.35 
  13  -5  -1   41.01    1.45 
  13  -5  -1   38.54    1.14 
 -13   5   1   40.14    1.44 
 -13   5   1   41.93    1.45 
 -13   5   1   40.63    1.45 
  13   5  -1   37.55    1.25 
 -13   5   1   39.74    1.51 
 -13   5   1   40.31    1.46 
  12  -5  -1   55.13    1.74 
  12  -5  -1   50.79    1.41 
 -12  -5   1   52.05    1.73 
 -12  -5   1   52.48    1.38 
 -12  -5   1   51.33    1.44 
 -12  -5   1   55.56    1.49 
 -12  -5   1   51.83    1.42 
  12  -5  -1   53.64    1.48 
 -12  -5   1   52.70    1.65 
 -12  -5   1   53.13    1.49 
 -12   5   1   53.18    1.72 
 -12   5   1   49.14    1.68 
 -12   5   1   50.93    1.68 
  12   5  -1   52.78    1.52 
 -12   5   1   49.84    1.63 
 -12   5   1   53.19    1.77 
 -11  -5   1   46.41    1.33 
  11  -5  -1   45.05    1.55 
 -11  -5   1   47.07    1.56 
 -11  -5   1   44.26    1.28 
  11  -5  -1   46.84    1.31 
  11  -5  -1   46.56    1.18 
 -11  -5   1   47.48    1.36 
 -11  -5   1   46.04    1.27 
 -11  -5   1   45.67    1.33 
 -11  -5   1   46.72    1.34 
  11  -5  -1   47.91    1.35 
 -11  -5   1   48.02    1.51 
 -11   5   1   46.92    1.48 
 -11   5   1   48.92    1.57 
  11   5  -1   47.97    1.38 
 -11   5   1   47.29    1.55 
 -11   5   1   45.78    1.56 
 -11   5   1   47.41    1.60 
 -10  -5   1   26.17    1.06 
 -10  -5   1   29.09    0.90 
  10  -5  -1   28.35    0.81 
 -10  -5   1   27.68    0.94 
 -10  -5   1   27.45    0.95 
 -10  -5   1   26.96    1.04 
  10  -5  -1   29.71    0.95 
  10  -5  -1   27.34    0.90 
 -10  -5   1   28.17    0.94 
 -10  -5   1   28.34    0.90 
  10  -5  -1   30.39    1.15 
 -10   5   1   28.17    1.10 
  10   5  -1   30.59    0.98 
 -10   5   1   29.68    1.14 
 -10   5   1   29.12    1.03 
 -10   5   1   28.96    1.13 
 -10   5   1   26.45    1.09 
  -9  -5   1   42.13    1.18 
   9  -5  -1   43.19    1.09 
  -9  -5   1   42.65    1.19 
   9  -5  -1   40.19    1.19 
  -9  -5   1   41.24    1.27 
  -9  -5   1   42.34    1.25 
   9  -5  -1   39.37    1.39 
  -9  -5   1   40.92    1.33 
   9  -5  -1   41.07    1.21 
   9  -5  -1   40.48    1.39 
  -9  -5   1   39.83    1.21 
  -9  -5   1   41.99    1.36 
  -9  -5   1   43.66    1.24 
  -9   5   1   40.86    1.39 
   9   5  -1   41.74    1.22 
  -9   5   1   41.73    1.41 
   9   5  -1   42.47    1.10 
  -9   5   1   40.87    1.38 
  -8  -5   1   32.75    1.02 
  -8  -5   1   34.33    1.07 
  -8  -5   1   31.25    1.06 
  -8  -5   1   32.89    1.14 
  -8  -5   1   33.65    1.13 
   8  -5  -1   33.48    1.04 
   8  -5  -1   34.80    0.94 
  -8  -5   1   32.95    1.06 
  -8  -5   1   34.57    1.01 
   8  -5  -1   34.42    1.23 
  -8  -5   1   33.54    1.06 
   8  -5  -1   32.23    1.02 
   8  -5  -1   36.21    1.23 
  -8   5   1   35.55    1.20 
  -8   5   1   34.69    1.20 
   8   5  -1   34.64    0.97 
  -8   5   1   33.57    1.20 
   8   5  -1   34.17    1.04 
   7  -5  -1   20.71    0.66 
  -7  -5   1   21.04    0.75 
  -7  -5   1   20.21    0.76 
   7  -5  -1   20.33    0.74 
  -7  -5   1   20.50    0.76 
   7  -5  -1   20.86    0.89 
  -7  -5   1   19.65    0.76 
  -7  -5   1   21.09    0.84 
  -7  -5   1   22.55    0.73 
  -7  -5   1   19.85    0.78 
  -7  -5   1   21.51    0.79 
   7  -5  -1   19.38    0.73 
   7  -5  -1   21.70    0.89 
   7   5  -1   20.63    0.74 
   7   5  -1   20.75    0.70 
  -7   5   1   20.39    0.84 
  -7   5   1   20.16    0.85 
  -7   5   1   20.82    0.87 
  -6  -5   1    8.25    0.44 
  -6  -5   1    8.10    0.48 
  -6  -5   1    6.99    0.38 
  -6  -5   1    7.69    0.43 
   6  -5  -1    7.93    0.52 
  -6  -5   1    7.55    0.42 
   6  -5  -1    8.09    0.43 
  -6  -5   1    8.01    0.44 
   6  -5  -1    7.47    0.42 
  -6  -5   1    7.76    0.44 
   6  -5  -1    8.12    0.51 
  -6  -5   1    8.08    0.44 
   6  -5  -1    8.09    0.37 
   6   5  -1    8.21    0.41 
  -6   5   1    8.53    0.51 
  -6   5   1    8.48    0.48 
  -6   5   1    8.80    0.53 
   6   5  -1    7.83    0.41 
  -5  -5   1   73.73    1.85 
   5  -5  -1   79.59    1.91 
  -5  -5   1   73.59    1.92 
  -5  -5   1   73.29    1.90 
  -5  -5   1   72.66    1.89 
  -5  -5   1   75.30    1.97 
  -5  -5   1   75.51    1.84 
   5  -5  -1   75.23    2.06 
  -5  -5   1   75.73    1.91 
  -5  -5   1   75.35    1.93 
   5  -5  -1   75.89    1.80 
   5  -5  -1   78.33    2.05 
   5  -5  -1   75.61    1.89 
  -5   5   1   71.04    2.00 
  -5   5   1   76.25    1.95 
  -5   5   1   72.28    2.02 
   5   5  -1   76.14    1.87 
   5   5  -1   78.27    1.87 
   4  -5  -1  182.54    4.28 
  -4  -5   1  181.27    4.13 
   4  -5  -1  187.20    4.03 
  -4  -5   1  185.68    4.07 
  -4  -5   1  190.96    4.21 
  -4  -5   1  187.20    4.17 
   4  -5  -1  188.09    4.27 
   4  -5  -1  188.41    4.11 
   4  -5  -1  188.75    4.13 
  -4  -5   1  182.17    4.16 
  -4  -5   1  178.17    4.13 
  -4   5   1  184.69    4.13 
   4   5  -1  186.47    4.09 
  -4   5   1  186.64    4.26 
   4   5  -1  183.97    4.11 
  -4   5   1  193.30    4.27 
   4   5  -1  189.67    4.15 
  -4   5   1  189.56    4.22 
   4   5  -1  192.48    3.98 
   3  -5  -1  239.16    5.42 
   3  -5  -1  252.64    5.22 
   3  -5  -1  246.08    5.27 
   3  -5  -1  247.61    5.42 
  -3  -5   1  239.95    5.26 
  -3  -5   1  242.48    5.30 
  -3  -5   1  251.67    5.36 
  -3  -5   1  255.90    5.38 
  -3  -5   1  235.15    5.31 
  -3  -5   1  246.04    5.24 
   3  -5  -1  247.42    5.30 
   3   5  -1  246.79    5.13 
   3   5  -1  240.56    5.30 
  -3   5   1  244.06    5.34 
  -3   5   1  243.90    5.40 
  -3   5   1  248.12    5.26 
  -3   5   1  239.67    5.40 
   3   5  -1  246.64    5.30 
   3   5  -1  247.96    5.25 
  -2  -5   1  211.06    4.61 
   2  -5  -1  204.71    4.73 
  -2  -5   1  218.38    4.72 
  -2  -5   1  211.86    4.60 
   2  -5  -1  218.01    4.59 
  -2  -5   1  211.84    4.69 
  -2  -5   1  216.35    4.71 
   2  -5  -1  214.94    4.66 
   2  -5  -1  208.32    4.76 
   2  -5  -1  210.30    4.62 
  -2  -5   1  219.85    4.68 
  -2   5   1  213.39    4.67 
   2   5  -1  206.66    4.60 
  -2   5   1  206.81    4.73 
   2   5  -1  211.69    4.67 
  -2   5   1  219.65    4.75 
   2   5  -1  216.67    4.69 
   2   5  -1  213.94    4.50 
  -2   5   1  215.09    4.57 
  -1  -5   1   55.62    1.55 
   1  -5  -1   57.10    1.49 
   1  -5  -1   57.08    1.58 
  -1  -5   1   56.53    1.47 
  -1  -5   1   57.24    1.52 
   1  -5  -1   57.50    1.60 
  -1  -5   1   56.18    1.48 
  -1  -5   1   54.82    1.53 
   1  -5  -1   55.94    1.46 
   1  -5  -1   57.51    1.53 
   1   5  -1   55.60    1.40 
   1   5  -1   57.56    1.55 
   1   5  -1   57.68    1.50 
  -1   5   1   55.94    1.57 
  -1   5   1   58.76    1.58 
  -1   5   1   56.12    1.50 
  -1   5   1   57.47    1.41 
   0  -5  -1  174.18    3.91 
   0  -5  -1  176.59    3.91 
   0  -5  -1  176.42    3.88 
   0  -5   1  170.69    3.90 
   0  -5   1  166.33    3.79 
   0  -5   1  175.90    3.93 
   0  -5   1  167.82    3.83 
   0  -5  -1  171.51    3.81 
   0  -5  -1  170.51    3.80 
   0  -5   1  169.20    3.77 
   0   5  -1  172.23    3.83 
   0   5   1  176.26    3.89 
   0   5  -1  177.37    3.91 
   0   5   1  170.83    3.89 
   0   5   1  172.06    3.68 
   0   5  -1  170.41    3.74 
   0   5   1  170.92    3.81 
   0   5  -1  175.29    3.90 
  -1  -5  -1   84.86    2.11 
  -1  -5  -1   87.33    2.15 
  -1  -5  -1   89.11    2.15 
  -1  -5  -1   84.87    2.07 
   1  -5   1   83.29    2.15 
   1  -5   1   82.63    2.07 
   1  -5   1   85.26    2.02 
   1  -5   1   83.36    2.05 
   1  -5   1   82.29    2.16 
  -1  -5  -1   85.64    2.06 
   1   5   1   85.45    2.11 
  -1   5  -1   85.01    2.03 
   1   5   1   84.49    1.91 
   1   5   1   86.47    2.13 
  -1   5  -1   83.10    2.14 
  -1   5  -1   85.00    2.10 
   1   5   1   83.48    2.03 
  -1   5  -1   86.23    2.16 
   2  -5   1  185.82    4.06 
   2  -5   1  180.19    4.06 
  -2  -5  -1  181.23    4.07 
  -2  -5  -1  184.32    4.10 
  -2  -5  -1  182.83    4.05 
   2  -5   1  187.76    4.20 
   2  -5   1  185.10    4.17 
  -2  -5  -1  185.89    4.12 
   2  -5   1  188.22    4.00 
  -2  -5  -1  187.03    4.12 
  -2   5  -1  181.81    4.06 
  -2   5  -1  181.65    4.16 
   2   5   1  183.43    4.00 
  -2   5  -1  182.06    4.17 
  -2   5  -1  178.62    4.10 
   2   5   1  188.34    4.09 
   2   5   1  188.75    3.86 
   2   5   1  185.37    4.10 
  -3  -5  -1   25.53    0.87 
   3  -5   1   26.55    0.96 
  -3  -5  -1   27.64    0.90 
  -3  -5  -1   27.28    0.89 
   3  -5   1   26.31    0.94 
   3  -5   1   26.39    0.86 
   3  -5   1   25.37    0.85 
   3  -5   1   27.90    0.82 
  -3  -5  -1   26.64    0.90 
  -3  -5  -1   26.31    0.90 
  -3  -5  -1   26.27    0.85 
  -3  -5  -1   26.51    0.88 
  -3   5  -1   27.33    0.95 
   3   5   1   27.40    0.71 
  -3   5  -1   25.08    0.93 
  -3   5  -1   24.59    0.87 
   3   5   1   25.58    0.80 
   3   5   1   26.67    0.86 
  -3   5  -1   26.30    0.92 
   4  -5   1   88.49    2.27 
  -4  -5  -1   89.08    2.22 
  -4  -5  -1   87.77    2.16 
  -4  -5  -1   90.79    2.20 
  -4  -5  -1   89.86    2.21 
   4  -5   1   91.40    2.08 
   4  -5   1   88.50    2.15 
   4  -5   1   90.33    2.30 
  -4  -5  -1   84.41    2.14 
  -4  -5  -1   90.46    2.15 
  -4  -5  -1   87.62    2.17 
  -4   5  -1   87.34    2.27 
   4   5   1   89.48    1.95 
   4   5   1   86.97    2.07 
   4   5   1   87.26    2.11 
  -4   5  -1   85.66    2.23 
  -4   5  -1   88.71    2.27 
  -4   5  -1   87.00    2.21 
  -5  -5  -1  189.76    4.39 
  -5  -5  -1  197.80    4.33 
   5  -5   1  197.72    4.32 
   5  -5   1  196.95    4.24 
  -5  -5  -1  196.22    4.38 
   5  -5   1  197.00    4.48 
  -5  -5  -1  203.86    4.34 
   5  -5   1  205.24    4.53 
  -5  -5  -1  195.24    4.39 
  -5  -5  -1  197.95    4.36 
  -5  -5  -1  194.18    4.33 
  -5  -5  -1  194.05    4.32 
  -5   5  -1  196.80    4.48 
  -5   5  -1  196.24    4.49 
  -5   5  -1  198.13    4.46 
   5   5   1  199.92    4.27 
   5   5   1  198.14    4.25 
  -5   5  -1  194.99    4.47 
  -6  -5  -1   48.03    1.35 
   6  -5   1   49.48    1.52 
   6  -5   1   49.06    1.35 
  -6  -5  -1   47.31    1.41 
  -6  -5  -1   49.75    1.42 
  -6  -5  -1   51.07    1.37 
   6  -5   1   48.98    1.28 
  -6  -5  -1   49.18    1.43 
  -6  -5  -1   49.02    1.34 
   6  -5   1   54.18    1.53 
  -6  -5  -1   48.12    1.36 
  -6   5  -1   51.10    1.52 
  -6   5  -1   47.81    1.48 
  -6   5  -1   48.17    1.49 
  -6   5  -1   53.15    1.54 
   6   5   1   50.95    1.31 
   6   5   1   49.36    1.29 
   7  -5   1   76.73    1.89 
  -7  -5  -1   75.90    1.92 
   7  -5   1   79.23    2.10 
  -7  -5  -1   76.03    1.88 
   7  -5   1   77.52    2.11 
  -7  -5  -1   73.25    1.88 
  -7  -5  -1   74.05    1.89 
  -7  -5  -1   75.56    1.97 
  -7  -5  -1   76.64    2.00 
   7  -5   1   74.96    1.81 
  -7  -5  -1   76.52    2.03 
  -7   5  -1   78.95    1.91 
   7   5   1   76.66    1.85 
  -7   5  -1   76.49    2.09 
   7   5   1   78.20    1.80 
  -7   5  -1   74.76    2.09 
  -7   5  -1   72.89    2.05 
  -8  -5  -1   55.75    1.59 
   8  -5   1   60.48    1.76 
  -8  -5  -1   56.88    1.51 
   8  -5   1   59.76    1.73 
  -8  -5  -1   58.32    1.56 
  -8  -5  -1   58.75    1.70 
   8  -5   1   58.94    1.52 
  -8  -5  -1   57.07    1.51 
  -8  -5  -1   56.86    1.49 
   8  -5   1   57.76    1.44 
  -8  -5  -1   58.52    1.64 
  -8   5  -1   54.41    1.56 
  -8   5  -1   58.10    1.71 
   8   5   1   57.43    1.38 
  -8   5  -1   59.00    1.77 
   8   5   1   58.22    1.49 
  -8   5  -1   59.22    1.73 
  -9  -5  -1   48.46    1.56 
  -9  -5  -1   49.51    1.35 
  -9  -5  -1   49.12    1.40 
   9  -5   1   49.91    1.59 
  -9  -5  -1   51.51    1.33 
  -9  -5  -1   49.52    1.49 
   9  -5   1   50.99    1.29 
   9  -5   1   50.75    1.59 
  -9  -5  -1   50.87    1.45 
  -9  -5  -1   51.22    1.36 
   9  -5   1   50.08    1.36 
  -9   5  -1   50.58    1.47 
  -9   5  -1   52.93    1.66 
  -9   5  -1   47.74    1.55 
   9   5   1   50.21    1.35 
  -9   5  -1   50.65    1.59 
  10  -5   1   11.90    0.66 
 -10  -5  -1    9.50    0.56 
  10  -5   1    9.87    0.42 
 -10  -5  -1   10.45    0.47 
 -10  -5  -1   10.35    0.54 
 -10  -5  -1    9.54    0.61 
 -10  -5  -1    9.14    0.42 
 -10  -5  -1    9.56    0.50 
  10  -5   1    9.85    0.47 
 -10  -5  -1    9.90    0.47 
 -10   5  -1   10.03    0.61 
 -10   5  -1   10.82    0.63 
 -10   5  -1   10.17    0.57 
  10   5   1   10.42    0.48 
 -10   5  -1    8.75    0.62 
 -10   5  -1   10.77    0.63 
 -11  -5  -1   27.36    0.82 
 -11  -5  -1   28.77    0.96 
  11  -5   1   26.93    0.88 
  11  -5   1   28.08    0.82 
 -11  -5  -1   29.66    0.89 
 -11  -5  -1   26.88    0.85 
 -11  -5  -1   28.36    0.87 
 -11  -5  -1   28.45    1.05 
 -11  -5  -1   28.65    1.00 
  11  -5   1   27.50    1.11 
 -11  -5  -1   27.39    1.15 
 -11   5  -1   26.91    1.08 
 -11   5  -1   29.56    1.09 
  11   5   1   27.75    0.91 
 -11   5  -1   26.37    1.10 
 -11   5  -1   29.55    1.21 
 -11   5  -1   27.44    1.10 
 -12  -5  -1   70.65    1.85 
  12  -5   1   68.73    2.05 
 -12  -5  -1   69.24    1.69 
  12  -5   1   69.86    1.75 
 -12  -5  -1   70.90    1.75 
 -12  -5  -1   73.21    1.90 
 -12  -5  -1   68.61    1.96 
 -12  -5  -1   71.44    2.16 
 -12  -5  -1   68.10    1.65 
  12  -5   1   67.05    1.67 
 -12   5  -1   68.58    2.03 
 -12   5  -1   72.36    2.08 
 -12   5  -1   69.42    2.04 
 -12   5  -1   69.91    2.08 
 -12   5  -1   70.16    2.20 
  12   5   1   71.27    1.82 
 -13  -5  -1   81.32    2.07 
 -13  -5  -1   76.34    1.78 
 -13  -5  -1   81.11    2.17 
 -13  -5  -1   75.46    2.35 
 -13  -5  -1   75.82    2.01 
 -13  -5  -1   78.17    1.90 
 -13  -5  -1   75.40    1.80 
 -13   5  -1   76.58    2.22 
 -13   5  -1   79.42    2.42 
 -13   5  -1   77.16    2.26 
 -13   5  -1   81.08    2.29 
  13   5   1   76.43    1.99 
 -13   5  -1   78.19    2.26 
 -14  -5  -1   44.58    1.50 
 -14  -5  -1   48.19    1.76 
 -14  -5  -1   48.72    1.29 
 -14  -5  -1   47.74    1.13 
 -14  -5  -1   48.62    1.12 
 -14  -5  -1   48.92    1.44 
 -14   5  -1   46.59    1.65 
  14   5   1   49.44    1.42 
 -14   5  -1   48.28    1.64 
 -14   5  -1   46.74    1.59 
 -14   5  -1   46.44    1.77 
 -14   5  -1   47.12    1.63 
 -15  -5  -1   17.19    0.83 
  15  -5   1   18.33    0.75 
 -15  -5  -1   17.76    0.64 
 -15  -5  -1   18.66    1.05 
 -15   5  -1   15.03    0.88 
 -15   5  -1   15.72    0.98 
 -15   5  -1   17.45    0.91 
 -15   5  -1   16.14    0.85 
 -15   5  -1   15.57    0.87 
 -16  -5  -1    1.75    0.43 
  16  -5   1    2.14    0.31 
 -16  -5  -1    2.44    0.39 
 -16   5  -1    2.57    0.50 
 -16   5  -1    2.11    0.45 
 -16   5  -1    1.87    0.38 
 -16   5  -1    2.06    0.40 
 -16   5  -1    1.74    0.38 
 -17  -5  -1    2.48    0.52 
 -17   5  -1    2.88    0.47 
 -17   5  -1    3.00    0.58 
 -17   5  -1    2.95    0.51 
 -17   5  -1    3.03    0.48 
 -18  -5  -1    3.22    0.62 
 -18   5  -1    3.25    0.56 
 -18   5  -1    3.28    0.50 
 -18   5  -1    2.85    0.56 
 -18   5  -1    3.21    0.51 
 -19  -5  -1    5.09    0.74 
 -19   5  -1    5.72    0.67 
 -19   5  -1    3.82    0.53 
 -19   5  -1    4.18    0.69 
 -19   5  -1    3.45    0.59 
 -20  -5  -1    6.14    0.86 
 -20   5  -1    8.36    0.82 
 -20   5  -1    9.43    1.03 
 -20   5  -1    6.86    0.71 
 -20   5  -1    6.94    0.85 
 -21  -5  -1    2.91    0.63 
 -21   5  -1    2.76    0.59 
 -21   5  -1    3.13    0.55 
 -21   5  -1    3.10    0.50 
 -21   5  -1    2.65    0.62 
 -22  -5  -1    0.06    0.31 
 -22   5  -1    1.16    0.48 
 -22   5  -1    0.23    0.26 
 -22   5  -1    0.77    0.37 
 -22   5  -1   -0.44    0.28 
 -23  -5  -1    1.57    0.50 
 -23   5  -1    0.96    0.36 
 -23   5  -1    1.09    0.47 
 -23   5  -1    2.10    0.42 
 -23   5  -1    1.67    0.55 
 -24  -5  -1   -0.27    0.28 
 -24   5  -1    0.24    0.39 
 -24   5  -1   -0.09    0.20 
 -24   5  -1   -0.39    0.25 
 -24   5  -1    0.60    0.45 
 -25  -5  -1    2.22    0.66 
 -25   5  -1    0.81    0.48 
 -25   5  -1    1.33    0.35 
 -25   5  -1    1.69    0.61 
 -26  -5  -1    2.22    0.65 
 -26   5  -1    2.59    0.72 
 -26   5  -1    2.66    0.68 
 -26   5  -1    2.73    0.45 
 -26  -6   1   20.98    1.49 
 -26   6   1   20.34    1.29 
 -26   6   1   20.87    1.47 
 -26   6   1   20.72    1.47 
 -25  -6   1   -0.25    0.30 
 -25   6   1    0.20    0.38 
 -25   6   1    0.06    0.26 
 -25   6   1    0.20    0.34 
 -25   6   1   -0.09    0.28 
 -24  -6   1   21.31    1.46 
 -24   6   1   23.42    1.25 
 -24   6   1   20.79    1.29 
 -24   6   1   22.06    1.45 
 -24   6   1   23.35    1.47 
 -23  -6   1    0.31    0.36 
 -23   6   1    0.05    0.25 
 -23   6   1    0.01    0.30 
 -23   6   1    0.25    0.34 
 -23   6   1   -0.16    0.22 
 -22  -6   1   20.58    1.35 
 -22   6   1   20.31    1.17 
 -22   6   1   23.76    1.39 
 -22   6   1   20.88    1.34 
 -22   6   1   21.91    1.24 
 -21  -6   1    3.58    0.67 
 -21   6   1    3.12    0.61 
 -21   6   1    2.81    0.55 
 -21   6   1    2.05    0.54 
 -21   6   1    2.65    0.51 
 -20  -6   1   28.12    1.49 
 -20   6   1   27.24    1.36 
 -20   6   1   27.68    1.42 
 -20   6   1   25.79    1.44 
 -20   6   1   27.32    1.34 
 -19  -6   1    1.67    0.50 
 -19   6   1    2.63    0.56 
 -19   6   1    2.98    0.54 
 -19   6   1    2.07    0.45 
 -19   6   1    2.22    0.49 
 -18  -6   1   22.76    1.28 
 -18  -6   1   23.72    0.66 
 -18  -6   1   24.50    1.13 
 -18  -6   1   22.45    0.64 
 -18   6   1   23.34    1.18 
 -18   6   1   22.18    1.19 
 -18   6   1   25.19    1.33 
 -18   6   1   21.88    1.16 
 -18   6   1   23.70    1.21 
 -17  -6   1    0.03    0.14 
 -17  -6   1    0.13    0.20 
 -17  -6   1    0.05    0.10 
 -17  -6   1    0.15    0.09 
 -17  -6   1    0.10    0.25 
 -17   6   1   -0.06    0.23 
 -17   6   1   -0.29    0.15 
 -17   6   1    0.27    0.24 
 -17   6   1   -0.03    0.20 
 -17   6   1    0.03    0.21 
 -16  -6   1    3.25    0.30 
 -16  -6   1    3.25    0.32 
  16  -6  -1    3.84    0.43 
 -16  -6   1    3.69    0.39 
 -16  -6   1    4.77    0.66 
 -16  -6   1    4.10    0.52 
 -16   6   1    2.50    0.45 
 -16   6   1    2.80    0.49 
 -16   6   1    4.07    0.56 
 -16   6   1    2.91    0.53 
 -16   6   1    2.75    0.48 
 -15  -6   1    6.49    0.37 
  15  -6  -1    6.06    0.45 
 -15  -6   1    6.13    0.43 
 -15  -6   1    6.30    0.56 
 -15  -6   1    7.01    0.66 
 -15  -6   1    5.39    0.38 
 -15  -6   1    6.30    0.69 
 -15   6   1    6.52    0.72 
  15   6  -1    6.28    0.48 
 -15   6   1    6.99    0.73 
 -15   6   1    5.06    0.61 
 -15   6   1    6.22    0.67 
 -15   6   1    7.45    0.80 
 -14  -6   1    5.59    0.36 
 -14  -6   1    5.71    0.52 
 -14  -6   1    6.50    0.63 
 -14  -6   1    5.52    0.40 
 -14  -6   1    6.22    0.44 
 -14  -6   1    6.80    0.70 
  14  -6  -1    5.89    0.44 
  14   6  -1    5.78    0.46 
 -14   6   1    6.39    0.72 
 -14   6   1    6.58    0.67 
 -14   6   1    6.88    0.67 
 -14   6   1    6.26    0.67 
 -14   6   1    6.69    0.69 
 -13  -6   1    6.10    0.43 
  13  -6  -1    6.13    0.65 
  13  -6  -1    4.98    0.39 
 -13  -6   1    5.58    0.37 
 -13  -6   1    5.57    0.41 
 -13  -6   1    5.91    0.41 
 -13  -6   1    5.58    0.61 
  13  -6  -1    5.44    0.42 
 -13  -6   1    6.23    0.46 
 -13  -6   1    5.64    0.58 
 -13   6   1    5.14    0.60 
 -13   6   1    4.94    0.57 
 -13   6   1    5.76    0.58 
 -13   6   1    5.25    0.60 
  13   6  -1    5.02    0.48 
 -13   6   1    6.01    0.68 
  12  -6  -1   27.88    1.01 
 -12  -6   1   29.34    1.02 
 -12  -6   1   27.14    1.16 
 -12  -6   1   29.53    1.01 
  12  -6  -1   29.14    0.99 
 -12  -6   1   28.32    1.00 
 -12  -6   1   27.41    1.03 
 -12  -6   1   30.15    1.16 
  12  -6  -1   27.82    1.22 
 -12  -6   1   29.14    0.95 
 -12  -6   1   29.64    0.98 
 -12   6   1   28.61    1.21 
 -12   6   1   27.86    1.19 
 -12   6   1   26.77    1.20 
 -12   6   1   28.02    1.11 
  12   6  -1   28.28    1.01 
 -12   6   1   27.28    1.21 
 -11  -6   1    3.20    0.43 
 -11  -6   1    3.47    0.40 
  11  -6  -1    2.81    0.34 
  11  -6  -1    3.44    0.38 
 -11  -6   1    4.06    0.40 
 -11  -6   1    3.99    0.41 
  11  -6  -1    3.37    0.31 
 -11  -6   1    3.21    0.33 
 -11  -6   1    3.01    0.42 
  11  -6  -1    2.59    0.42 
 -11  -6   1    3.71    0.40 
 -11   6   1    2.28    0.41 
 -11   6   1    3.96    0.45 
 -11   6   1    3.31    0.47 
 -11   6   1    2.70    0.42 
 -11   6   1    3.74    0.50 
  11   6  -1    3.46    0.38 
  10  -6  -1   22.87    1.06 
 -10  -6   1   24.52    0.86 
 -10  -6   1   24.83    1.01 
 -10  -6   1   23.99    0.98 
 -10  -6   1   23.27    0.89 
 -10  -6   1   21.84    0.86 
 -10  -6   1   22.28    0.83 
  10  -6  -1   24.39    0.89 
 -10  -6   1   24.17    0.92 
  10  -6  -1   23.88    0.76 
  10  -6  -1   22.59    0.86 
 -10   6   1   23.08    1.03 
 -10   6   1   23.78    1.05 
  10   6  -1   22.85    0.86 
 -10   6   1   22.72    1.04 
  -9  -6   1    0.28    0.15 
  -9  -6   1    0.31    0.13 
   9  -6  -1    0.32    0.13 
  -9  -6   1    0.35    0.18 
   9  -6  -1    0.22    0.19 
  -9  -6   1    0.38    0.15 
   9  -6  -1    0.43    0.16 
  -9  -6   1    0.46    0.18 
  -9  -6   1    0.52    0.17 
   9  -6  -1    0.22    0.16 
  -9  -6   1    0.24    0.17 
  -9  -6   1    0.61    0.21 
   9  -6  -1    0.28    0.19 
  -9   6   1    0.52    0.21 
  -9   6   1    0.21    0.18 
   9   6  -1    0.53    0.17 
  -9   6   1    0.20    0.18 
  -8  -6   1   25.04    0.95 
  -8  -6   1   25.39    0.94 
  -8  -6   1   25.69    0.94 
   8  -6  -1   24.43    0.90 
   8  -6  -1   23.41    1.03 
  -8  -6   1   26.39    0.95 
  -8  -6   1   25.52    0.88 
  -8  -6   1   24.76    0.89 
   8  -6  -1   25.21    0.81 
  -8  -6   1   25.11    0.92 
   8  -6  -1   26.26    0.92 
  -8  -6   1   24.01    0.98 
   8  -6  -1   25.63    1.09 
  -8   6   1   23.43    1.02 
  -8   6   1   23.64    1.04 
   8   6  -1   24.61    0.83 
  -8   6   1   26.84    1.04 
   8   6  -1   23.53    0.87 
  -7  -6   1   14.64    0.67 
  -7  -6   1   15.96    0.75 
  -7  -6   1   15.58    0.64 
  -7  -6   1   15.38    0.69 
   7  -6  -1   16.01    0.67 
  -7  -6   1   14.72    0.66 
   7  -6  -1   14.61    0.65 
  -7  -6   1   15.77    0.69 
   7  -6  -1   14.99    0.79 
  -7  -6   1   14.68    0.65 
   7  -6  -1   13.77    0.57 
   7  -6  -1   14.99    0.77 
  -7  -6   1   14.16    0.66 
  -7   6   1   14.75    0.72 
   7   6  -1   14.90    0.63 
   7   6  -1   15.63    0.63 
  -7   6   1   13.41    0.75 
  -7   6   1   14.13    0.75 
  -6  -6   1   18.08    0.70 
  -6  -6   1   16.93    0.73 
  -6  -6   1   16.65    0.77 
   6  -6  -1   17.34    0.72 
  -6  -6   1   17.42    0.73 
  -6  -6   1   18.15    0.70 
   6  -6  -1   17.93    0.72 
   6  -6  -1   16.57    0.83 
  -6  -6   1   16.98    0.73 
   6  -6  -1   16.70    0.82 
  -6  -6   1   17.61    0.75 
  -6  -6   1   17.92    0.75 
   6  -6  -1   17.65    0.65 
  -6   6   1   16.65    0.81 
   6   6  -1   18.34    0.71 
  -6   6   1   18.93    0.79 
   6   6  -1   17.81    0.70 
  -6   6   1   16.84    0.82 
  -5  -6   1    1.04    0.23 
  -5  -6   1    1.09    0.22 
  -5  -6   1    1.17    0.23 
  -5  -6   1    0.76    0.21 
   5  -6  -1    1.37    0.28 
   5  -6  -1    1.23    0.21 
  -5  -6   1    1.49    0.25 
  -5  -6   1    1.31    0.25 
   5  -6  -1    1.08    0.25 
   5  -6  -1    1.49    0.25 
  -5  -6   1    1.36    0.25 
   5  -6  -1    1.25    0.24 
  -5   6   1    1.10    0.25 
  -5   6   1    1.54    0.28 
  -5   6   1    1.08    0.26 
   5   6  -1    1.56    0.24 
  -5   6   1    1.41    0.25 
   5   6  -1    1.18    0.18 
   5   6  -1    1.58    0.26 
   4  -6  -1    1.85    0.31 
   4  -6  -1    2.22    0.34 
  -4  -6   1    2.52    0.32 
   4  -6  -1    1.97    0.28 
   4  -6  -1    1.71    0.23 
   4  -6  -1    1.54    0.24 
  -4  -6   1    1.40    0.25 
  -4  -6   1    2.38    0.28 
  -4  -6   1    2.34    0.32 
  -4  -6   1    2.56    0.32 
  -4  -6   1    1.97    0.30 
  -4   6   1    2.04    0.33 
  -4   6   1    2.03    0.30 
  -4   6   1    1.72    0.27 
   4   6  -1    2.29    0.24 
   4   6  -1    2.18    0.30 
  -4   6   1    1.61    0.29 
   4   6  -1    1.93    0.29 
   4   6  -1    1.69    0.25 
   3  -6  -1   10.62    0.56 
  -3  -6   1   12.55    0.61 
  -3  -6   1   12.79    0.63 
  -3  -6   1   11.47    0.54 
   3  -6  -1   11.75    0.64 
   3  -6  -1   10.42    0.62 
  -3  -6   1   11.31    0.59 
   3  -6  -1   11.80    0.53 
   3  -6  -1   11.45    0.56 
  -3  -6   1   11.97    0.59 
  -3  -6   1   10.92    0.54 
   3   6  -1   12.37    0.59 
  -3   6   1   10.58    0.61 
  -3   6   1   12.45    0.55 
   3   6  -1   12.49    0.60 
   3   6  -1   11.51    0.54 
  -3   6   1   11.61    0.62 
  -3   6   1   12.10    0.60 
   3   6  -1   12.23    0.48 
   2  -6  -1   50.21    1.53 
   2  -6  -1   50.15    1.55 
  -2  -6   1   49.54    1.44 
  -2  -6   1   47.65    1.46 
  -2  -6   1   50.24    1.50 
  -2  -6   1   48.69    1.40 
   2  -6  -1   48.78    1.37 
  -2  -6   1   48.35    1.39 
   2  -6  -1   50.43    1.42 
  -2  -6   1   54.59    1.52 
   2  -6  -1   51.97    1.46 
  -2   6   1   48.96    1.51 
   2   6  -1   47.04    1.39 
  -2   6   1   51.64    1.47 
  -2   6   1   47.86    1.34 
  -2   6   1   50.24    1.52 
   2   6  -1   51.47    1.48 
   2   6  -1   50.57    1.30 
   2   6  -1   47.05    1.44 
  -1  -6   1    0.61    0.18 
   1  -6  -1    0.36    0.17 
   1  -6  -1    0.56    0.17 
  -1  -6   1    0.38    0.15 
  -1  -6   1    0.49    0.17 
   1  -6  -1    0.82    0.20 
   1  -6  -1    0.57    0.18 
   1  -6  -1    0.58    0.19 
  -1  -6   1    0.75    0.21 
  -1  -6   1    0.69    0.18 
  -1   6   1    0.48    0.17 
  -1   6   1    0.64    0.20 
   1   6  -1    0.56    0.19 
   1   6  -1    1.02    0.22 
   1   6  -1    0.58    0.15 
  -1   6   1    0.69    0.20 
  -1   6   1    0.45    0.14 
   1   6  -1    0.54    0.16 
   0  -6  -1   14.46    0.68 
   0  -6   1   15.06    0.65 
   0  -6   1   13.14    0.58 
   0  -6   1   14.81    0.62 
   0  -6  -1   13.44    0.60 
   0  -6  -1   12.26    0.65 
   0  -6  -1   13.33    0.60 
   0  -6   1   13.70    0.67 
   0  -6   1   13.58    0.68 
   0  -6  -1   14.62    0.65 
   0   6   1   14.07    0.53 
   0   6  -1   14.41    0.63 
   0   6   1   13.96    0.61 
   0   6  -1   15.02    0.58 
   0   6   1   14.42    0.67 
   0   6   1   14.06    0.66 
   0   6  -1   13.52    0.66 
   0   6  -1   14.20    0.67 
  -1  -6  -1    1.49    0.25 
   1  -6   1    1.24    0.22 
  -1  -6  -1    1.79    0.27 
   1  -6   1    1.50    0.27 
  -1  -6  -1    1.67    0.27 
   1  -6   1    1.91    0.30 
  -1  -6  -1    1.27    0.24 
   1  -6   1    1.66    0.26 
   1  -6   1    1.30    0.26 
  -1  -6  -1    1.47    0.26 
  -1   6  -1    1.66    0.24 
   1   6   1    1.66    0.20 
  -1   6  -1    1.62    0.25 
   1   6   1    1.57    0.26 
   1   6   1    1.58    0.23 
  -1   6  -1    2.10    0.30 
  -1   6  -1    1.72    0.28 
   1   6   1    1.90    0.28 
   2  -6   1    4.44    0.47 
   2  -6   1    4.45    0.47 
  -2  -6  -1    3.69    0.38 
  -2  -6  -1    3.39    0.38 
  -2  -6  -1    3.85    0.38 
  -2  -6  -1    4.45    0.44 
   2  -6   1    3.22    0.35 
   2  -6   1    2.87    0.30 
  -2  -6  -1    2.89    0.34 
   2  -6   1    3.01    0.33 
  -2   6  -1    3.62    0.41 
  -2   6  -1    3.08    0.37 
   2   6   1    3.72    0.39 
  -2   6  -1    3.28    0.34 
   2   6   1    3.50    0.35 
  -2   6  -1    3.19    0.37 
   2   6   1    3.72    0.39 
   2   6   1    3.20    0.22 
  -3  -6  -1   42.33    1.27 
   3  -6   1   43.39    1.28 
   3  -6   1   40.45    1.36 
  -3  -6  -1   40.48    1.29 
   3  -6   1   40.75    1.38 
  -3  -6  -1   41.08    1.29 
   3  -6   1   44.64    1.30 
  -3  -6  -1   43.76    1.32 
  -3  -6  -1   41.80    1.31 
   3  -6   1   42.34    1.21 
  -3  -6  -1   42.65    1.32 
  -3   6  -1   41.76    1.37 
   3   6   1   42.34    1.21 
   3   6   1   42.50    1.29 
   3   6   1   43.72    1.08 
   3   6   1   42.53    1.28 
  -3   6  -1   42.54    1.29 
  -3   6  -1   42.97    1.34 
  -3   6  -1   43.54    1.38 
  -4  -6  -1    0.15    0.13 
   4  -6   1    0.30    0.14 
   4  -6   1    0.13    0.15 
  -4  -6  -1    0.52    0.18 
  -4  -6  -1    0.27    0.13 
  -4  -6  -1    0.09    0.12 
   4  -6   1    0.01    0.09 
   4  -6   1    0.18    0.12 
  -4  -6  -1    0.30    0.15 
  -4  -6  -1    0.25    0.14 
   4  -6   1    0.08    0.14 
  -4  -6  -1    0.24    0.15 
  -4   6  -1   -0.06    0.13 
   4   6   1    0.03    0.10 
   4   6   1    0.25    0.09 
  -4   6  -1    0.06    0.14 
  -4   6  -1    0.16    0.16 
  -4   6  -1    0.34    0.16 
   4   6   1    0.35    0.15 
   5  -6   1    8.21    0.47 
  -5  -6  -1    8.63    0.51 
   5  -6   1    8.85    0.57 
  -5  -6  -1    8.38    0.51 
  -5  -6  -1    8.77    0.49 
  -5  -6  -1    9.21    0.50 
   5  -6   1    7.44    0.46 
  -5  -6  -1    8.37    0.50 
   5  -6   1    7.55    0.53 
   5  -6   1    7.35    0.41 
  -5  -6  -1    8.34    0.48 
  -5  -6  -1    7.54    0.46 
   5   6   1    7.67    0.33 
  -5   6  -1    7.44    0.53 
   5   6   1    8.65    0.43 
   5   6   1    8.55    0.45 
  -5   6  -1    8.44    0.54 
  -5   6  -1    8.86    0.53 
  -5   6  -1    8.18    0.54 
  -6  -6  -1    6.01    0.44 
  -6  -6  -1    6.95    0.43 
   6  -6   1    7.92    0.47 
   6  -6   1    6.87    0.38 
  -6  -6  -1    6.84    0.43 
   6  -6   1    6.50    0.50 
  -6  -6  -1    6.95    0.43 
   6  -6   1    7.00    0.43 
   6  -6   1    8.20    0.56 
  -6  -6  -1    7.00    0.44 
  -6  -6  -1    8.16    0.50 
  -6   6  -1    7.26    0.52 
  -6   6  -1    6.96    0.49 
   6   6   1    7.63    0.40 
  -6   6  -1    6.59    0.50 
   6   6   1    7.64    0.42 
  -6   6  -1    6.27    0.48 
  -7  -6  -1    1.84    0.29 
   7  -6   1    1.77    0.26 
  -7  -6  -1    2.00    0.28 
   7  -6   1    1.31    0.28 
  -7  -6  -1    2.44    0.31 
  -7  -6  -1    1.41    0.23 
   7  -6   1    1.69    0.32 
   7  -6   1    1.75    0.28 
  -7  -6  -1    2.01    0.29 
  -7  -6  -1    2.23    0.33 
   7  -6   1    1.86    0.24 
  -7  -6  -1    2.12    0.31 
   7   6   1    1.59    0.23 
  -7   6  -1    1.71    0.31 
   7   6   1    2.54    0.28 
  -7   6  -1    1.69    0.31 
  -7   6  -1    1.13    0.26 
  -8  -6  -1    2.51    0.35 
   8  -6   1    2.76    0.34 
  -8  -6  -1    2.09    0.27 
  -8  -6  -1    2.31    0.29 
   8  -6   1    3.38    0.44 
  -8  -6  -1    2.48    0.33 
  -8  -6  -1    3.06    0.35 
   8  -6   1    3.00    0.43 
  -8  -6  -1    2.26    0.32 
   8  -6   1    2.22    0.29 
  -8  -6  -1    2.07    0.32 
   8  -6   1    2.24    0.26 
  -8   6  -1    1.77    0.34 
  -8   6  -1    3.17    0.45 
   8   6   1    2.79    0.29 
  -8   6  -1    3.19    0.34 
  -8   6  -1    2.53    0.37 
   9  -6   1    5.32    0.33 
  -9  -6  -1    4.54    0.35 
  -9  -6  -1    5.20    0.47 
   9  -6   1    5.03    0.37 
  -9  -6  -1    5.22    0.50 
   9  -6   1    5.29    0.58 
  -9  -6  -1    5.44    0.54 
   9  -6   1    5.30    0.40 
  -9  -6  -1    4.64    0.34 
  -9  -6  -1    5.50    0.43 
  -9  -6  -1    5.20    0.37 
  -9   6  -1    5.49    0.58 
  -9   6  -1    5.60    0.57 
  -9   6  -1    4.28    0.36 
  -9   6  -1    4.37    0.51 
   9   6   1    4.76    0.34 
  10  -6   1   15.43    0.65 
 -10  -6  -1   14.19    0.63 
 -10  -6  -1   14.36    0.63 
  10  -6   1   15.11    0.58 
  10  -6   1   14.67    0.82 
 -10  -6  -1   14.25    0.71 
 -10  -6  -1   14.13    0.72 
 -10  -6  -1   13.39    0.59 
 -10  -6  -1   14.47    0.67 
 -10  -6  -1   14.17    0.77 
  10  -6   1   13.59    0.66 
 -10   6  -1   15.19    0.82 
 -10   6  -1   14.43    0.82 
 -10   6  -1   15.34    0.71 
  10   6   1   14.65    0.62 
 -10   6  -1   14.45    0.80 
 -11  -6  -1   15.24    0.76 
  11  -6   1   15.13    0.84 
  11  -6   1   15.37    0.59 
 -11  -6  -1   14.70    0.81 
  11  -6   1   15.90    0.71 
 -11  -6  -1   14.75    0.64 
 -11  -6  -1   15.36    0.70 
 -11  -6  -1   15.81    0.75 
  11  -6   1   15.75    0.67 
 -11  -6  -1   14.98    0.61 
 -11  -6  -1   15.78    0.66 
  11   6   1   14.23    0.63 
 -11   6  -1   16.21    0.85 
 -11   6  -1   16.13    0.77 
 -11   6  -1   16.08    0.90 
 -11   6  -1   14.21    0.81 
 -11   6  -1   14.36    0.83 
 -12  -6  -1   11.06    0.53 
  12  -6   1   10.08    0.70 
 -12  -6  -1   11.13    0.54 
 -12  -6  -1   11.03    0.62 
 -12  -6  -1   10.55    0.64 
 -12  -6  -1   11.33    0.59 
 -12  -6  -1   10.49    0.73 
 -12  -6  -1   11.16    0.53 
  12  -6   1   10.53    0.59 
  12  -6   1    9.74    0.52 
 -12  -6  -1   10.79    0.50 
 -12   6  -1    9.99    0.64 
 -12   6  -1   10.72    0.70 
 -12   6  -1    9.89    0.70 
 -12   6  -1   11.92    0.74 
 -12   6  -1    9.27    0.72 
  12   6   1   11.60    0.56 
 -13  -6  -1    8.78    0.46 
 -13  -6  -1    9.16    0.61 
 -13  -6  -1    9.67    0.71 
 -13  -6  -1   10.53    0.52 
 -13  -6  -1    9.05    0.44 
 -13  -6  -1   10.77    0.58 
 -13  -6  -1    9.44    0.58 
  13  -6   1    9.69    0.56 
 -13   6  -1    9.16    0.66 
 -13   6  -1   10.17    0.70 
 -13   6  -1   10.02    0.71 
  13   6   1    9.35    0.52 
 -13   6  -1    9.35    0.65 
 -13   6  -1    8.67    0.70 
 -14  -6  -1    2.36    0.36 
 -14  -6  -1    2.23    0.29 
 -14  -6  -1    2.10    0.38 
  14  -6   1    2.13    0.34 
 -14  -6  -1    2.12    0.25 
 -14  -6  -1    1.54    0.37 
 -14  -6  -1    2.00    0.23 
 -14   6  -1    1.68    0.36 
 -14   6  -1    2.57    0.44 
 -14   6  -1    2.75    0.47 
 -14   6  -1    1.83    0.37 
 -14   6  -1    1.87    0.44 
 -15  -6  -1   -0.06    0.11 
  15  -6   1    0.01    0.15 
 -15  -6  -1   -0.05    0.19 
 -15  -6  -1   -0.13    0.07 
 -15  -6  -1    0.19    0.19 
 -15  -6  -1    0.08    0.08 
 -15   6  -1    0.07    0.19 
 -15   6  -1    0.06    0.18 
 -15   6  -1    0.27    0.22 
 -15   6  -1    0.04    0.21 
 -15   6  -1   -0.14    0.16 
 -16  -6  -1   18.55    0.92 
  16  -6   1   17.86    0.82 
 -16  -6  -1   17.31    1.07 
 -16   6  -1   19.14    1.03 
 -16   6  -1   19.36    1.00 
 -16   6  -1   19.40    1.05 
 -16   6  -1   20.67    1.05 
 -16   6  -1   18.04    1.11 
 -17  -6  -1    1.75    0.44 
 -17   6  -1    1.87    0.42 
 -17   6  -1    1.40    0.43 
 -17   6  -1    1.90    0.41 
 -17   6  -1    1.76    0.43 
 -18  -6  -1   13.88    0.99 
 -18   6  -1   11.75    0.83 
 -18   6  -1   13.64    1.02 
 -18   6  -1   12.45    0.91 
 -18   6  -1   13.36    0.89 
 -19  -6  -1    0.12    0.26 
 -19   6  -1   -0.23    0.21 
 -19   6  -1    0.09    0.27 
 -19   6  -1   -0.17    0.17 
 -19   6  -1    0.29    0.25 
 -20  -6  -1   21.19    1.33 
 -20   6  -1   21.96    1.18 
 -20   6  -1   22.30    1.37 
 -20   6  -1   24.29    1.33 
 -20   6  -1   24.84    1.27 
 -21  -6  -1    0.72    0.40 
 -21   6  -1    0.49    0.34 
 -21   6  -1    0.18    0.30 
 -21   6  -1    1.24    0.46 
 -21   6  -1    0.65    0.34 
 -22  -6  -1   17.83    1.28 
 -22   6  -1   17.64    1.23 
 -22   6  -1   17.53    1.26 
 -22   6  -1   19.23    1.16 
 -22   6  -1   18.38    1.07 
 -23  -6  -1    3.66    0.75 
 -23   6  -1    3.22    0.73 
 -23   6  -1    3.11    0.64 
 -23   6  -1    2.81    0.52 
 -23   6  -1    2.62    0.58 
 -24  -6  -1   19.07    1.40 
 -24   6  -1   23.16    1.47 
 -24   6  -1   21.49    1.17 
 -24   6  -1   21.92    1.28 
 -24   6  -1   23.54    1.50 
 -25  -6  -1    0.33    0.45 
 -25   6  -1    0.49    0.41 
 -25   6  -1    0.03    0.27 
 -25   6  -1    0.13    0.38 
 -25  -7   1    1.10    0.54 
 -25   7   1    1.57    0.57 
 -25   7   1    1.00    0.46 
 -25   7   1    1.17    0.55 
 -25   7   1    0.75    0.41 
 -24  -7   1   -0.01    0.38 
 -24   7   1    0.22    0.42 
 -24   7   1    0.58    0.37 
 -24   7   1    1.07    0.47 
 -24   7   1    0.11    0.33 
 -23  -7   1    1.02    0.48 
 -23   7   1    1.11    0.41 
 -23   7   1    0.91    0.48 
 -23   7   1    0.59    0.38 
 -23   7   1    0.62    0.34 
 -22  -7   1    1.63    0.48 
 -22   7   1    1.23    0.43 
 -22   7   1    1.56    0.50 
 -22   7   1    1.82    0.54 
 -22   7   1    1.46    0.46 
 -21  -7   1    0.76    0.44 
 -21   7   1    0.07    0.31 
 -21   7   1    0.45    0.34 
 -21   7   1    1.05    0.44 
 -21   7   1    0.35    0.30 
 -20  -7   1    0.89    0.38 
 -20   7   1    0.48    0.33 
 -20   7   1    0.68    0.36 
 -20   7   1    1.10    0.42 
 -20   7   1    1.27    0.46 
 -19  -7   1    1.24    0.15 
 -19  -7   1    0.74    0.35 
 -19   7   1    0.65    0.34 
 -19   7   1    0.48    0.33 
 -19   7   1    1.51    0.47 
 -19   7   1    0.76    0.36 
 -18  -7   1    2.65    0.53 
 -18  -7   1    3.11    0.29 
 -18  -7   1    1.65    0.40 
 -18   7   1    3.18    0.57 
 -18   7   1    1.83    0.49 
 -18   7   1    1.70    0.43 
 -18   7   1    3.08    0.55 
 -18   7   1    2.37    0.50 
 -17  -7   1    1.10    0.38 
 -17  -7   1    0.99    0.33 
 -17  -7   1    1.05    0.20 
 -17   7   1    1.20    0.44 
 -17   7   1    0.89    0.35 
 -17   7   1    0.67    0.32 
 -17   7   1    1.35    0.39 
 -17   7   1    1.08    0.37 
  16  -7  -1    0.00    0.17 
 -16  -7   1    0.01    0.14 
 -16  -7   1    0.30    0.25 
 -16  -7   1   -0.14    0.17 
 -16  -7   1    0.07    0.12 
 -16   7   1   -0.20    0.19 
 -16   7   1    0.30    0.24 
 -16   7   1   -0.05    0.20 
 -16   7   1   -0.02    0.20 
 -16   7   1    0.17    0.22 
 -15  -7   1    2.13    0.44 
 -15  -7   1    1.96    0.36 
 -15  -7   1    2.42    0.31 
 -15  -7   1    1.71    0.39 
  15  -7  -1    1.77    0.32 
 -15  -7   1    2.30    0.34 
 -15   7   1    1.66    0.40 
 -15   7   1    2.29    0.45 
 -15   7   1    2.11    0.46 
 -15   7   1    1.35    0.40 
 -15   7   1    2.91    0.49 
  14  -7  -1    1.56    0.31 
 -14  -7   1    1.72    0.31 
 -14  -7   1    1.18    0.29 
 -14  -7   1    1.74    0.37 
 -14  -7   1    1.77    0.27 
 -14  -7   1    2.07    0.42 
  14   7  -1    1.66    0.30 
 -14   7   1    1.78    0.40 
 -14   7   1    1.60    0.40 
 -14   7   1    2.07    0.45 
 -14   7   1    2.17    0.43 
 -14   7   1    2.12    0.39 
 -13  -7   1    0.12    0.18 
 -13  -7   1   -0.14    0.18 
 -13  -7   1    0.00    0.14 
 -13  -7   1   -0.05    0.11 
  13  -7  -1   -0.11    0.13 
  13  -7  -1    0.07    0.20 
 -13  -7   1    0.14    0.16 
 -13  -7   1    0.11    0.18 
  13  -7  -1    0.18    0.16 
 -13   7   1    0.39    0.22 
  13   7  -1    0.14    0.15 
 -13   7   1   -0.12    0.18 
 -13   7   1    0.00    0.18 
 -13   7   1    0.33    0.24 
 -13   7   1    0.51    0.29 
  12  -7  -1    6.28    0.46 
 -12  -7   1    6.81    0.49 
 -12  -7   1    6.76    0.56 
 -12  -7   1    7.00    0.56 
 -12  -7   1    7.16    0.47 
  12  -7  -1    6.11    0.71 
 -12  -7   1    6.43    0.51 
  12  -7  -1    5.98    0.55 
 -12  -7   1    5.94    0.43 
  12   7  -1    6.79    0.47 
 -12   7   1    6.97    0.73 
 -12   7   1    6.35    0.69 
 -12   7   1    6.49    0.63 
 -12   7   1    5.90    0.64 
 -12   7   1    6.87    0.73 
 -11  -7   1   21.10    0.85 
 -11  -7   1   21.00    0.97 
  11  -7  -1   20.42    0.75 
  11  -7  -1   20.29    0.86 
 -11  -7   1   21.08    0.99 
  11  -7  -1   20.94    1.07 
 -11  -7   1   20.98    0.92 
 -11  -7   1   20.23    0.87 
 -11  -7   1   21.75    0.87 
  11  -7  -1   20.34    0.87 
 -11   7   1   21.63    0.92 
 -11   7   1   21.47    1.07 
  11   7  -1   20.16    0.84 
 -11   7   1   21.79    1.09 
 -11   7   1   23.30    1.08 
 -10  -7   1    1.77    0.34 
  10  -7  -1    1.62    0.30 
 -10  -7   1    1.13    0.25 
 -10  -7   1    1.13    0.25 
  10  -7  -1    1.48    0.24 
 -10  -7   1    1.17    0.29 
 -10  -7   1    1.02    0.27 
  10  -7  -1    1.53    0.29 
 -10  -7   1    1.28    0.25 
  10  -7  -1    1.66    0.38 
 -10   7   1    1.14    0.30 
 -10   7   1    1.45    0.34 
  10   7  -1    1.43    0.27 
 -10   7   1    1.35    0.32 
  -9  -7   1    0.36    0.20 
  -9  -7   1    0.14    0.15 
   9  -7  -1    0.43    0.24 
  -9  -7   1    0.32    0.17 
   9  -7  -1    0.39    0.18 
   9  -7  -1    0.09    0.13 
  -9  -7   1    0.17    0.13 
  -9  -7   1    0.19    0.16 
   9  -7  -1    0.26    0.14 
  -9  -7   1    0.24    0.17 
  -9  -7   1    0.32    0.16 
  -9   7   1    0.18    0.19 
   9   7  -1    0.23    0.15 
  -9   7   1   -0.02    0.17 
  -9   7   1    0.10    0.16 
   8  -7  -1    3.11    0.39 
  -8  -7   1    2.66    0.37 
   8  -7  -1    3.33    0.48 
  -8  -7   1    3.31    0.43 
   8  -7  -1    3.00    0.45 
  -8  -7   1    2.78    0.39 
  -8  -7   1    2.95    0.36 
  -8  -7   1    3.58    0.40 
  -8  -7   1    3.12    0.38 
   8  -7  -1    3.53    0.40 
   8  -7  -1    3.34    0.35 
  -8  -7   1    2.93    0.38 
  -8   7   1    2.60    0.39 
   8   7  -1    3.24    0.36 
  -8   7   1    2.44    0.40 
   8   7  -1    3.66    0.39 
  -8   7   1    2.07    0.40 
   7  -7  -1    2.14    0.38 
  -7  -7   1    1.84    0.32 
  -7  -7   1    1.95    0.34 
   7  -7  -1    1.41    0.33 
  -7  -7   1    1.66    0.28 
  -7  -7   1    1.98    0.30 
  -7  -7   1    1.36    0.28 
   7  -7  -1    2.20    0.28 
   7  -7  -1    2.44    0.34 
   7  -7  -1    1.65    0.29 
  -7  -7   1    1.90    0.31 
  -7   7   1    1.33    0.30 
  -7   7   1    1.78    0.35 
   7   7  -1    1.66    0.27 
   7   7  -1    1.86    0.28 
  -7   7   1    2.08    0.35 
  -6  -7   1   -0.03    0.14 
  -6  -7   1    0.03    0.11 
  -6  -7   1    0.01    0.13 
   6  -7  -1   -0.07    0.14 
   6  -7  -1    0.02    0.11 
  -6  -7   1   -0.03    0.11 
  -6  -7   1   -0.06    0.10 
   6  -7  -1    0.07    0.12 
   6  -7  -1    0.08    0.11 
  -6  -7   1   -0.09    0.09 
   6  -7  -1    0.12    0.17 
   6   7  -1   -0.02    0.10 
  -6   7   1    0.18    0.16 
  -6   7   1    0.09    0.15 
   6   7  -1    0.07    0.09 
   6   7  -1    0.19    0.13 
  -6   7   1    0.03    0.11 
   5  -7  -1    0.22    0.14 
   5  -7  -1    0.70    0.21 
   5  -7  -1    0.29    0.19 
  -5  -7   1    0.31    0.17 
   5  -7  -1    0.43    0.16 
  -5  -7   1    0.13    0.13 
  -5  -7   1    0.45    0.18 
   5  -7  -1    0.34    0.20 
  -5  -7   1    0.28    0.16 
  -5  -7   1    0.60    0.18 
  -5  -7   1    0.35    0.17 
   5   7  -1    0.31    0.16 
  -5   7   1    0.28    0.18 
   5   7  -1    0.83    0.19 
  -5   7   1    0.29    0.18 
  -5   7   1    0.15    0.14 
   5   7  -1    0.32    0.13 
  -5   7   1    0.49    0.18 
  -4  -7   1   13.14    0.62 
  -4  -7   1   12.20    0.63 
  -4  -7   1   11.81    0.65 
   4  -7  -1   13.05    0.73 
   4  -7  -1   10.93    0.69 
  -4  -7   1   12.07    0.66 
   4  -7  -1   12.69    0.58 
   4  -7  -1   13.13    0.64 
  -4  -7   1   13.36    0.66 
  -4  -7   1   12.37    0.67 
   4  -7  -1   11.87    0.63 
  -4   7   1   12.36    0.67 
   4   7  -1   11.23    0.61 
   4   7  -1   12.18    0.65 
   4   7  -1   12.21    0.59 
   4   7  -1   11.97    0.51 
  -4   7   1   12.20    0.70 
  -4   7   1   11.75    0.60 
  -4   7   1   12.15    0.69 
  -3  -7   1   31.92    1.13 
   3  -7  -1   28.59    0.99 
  -3  -7   1   28.23    1.06 
  -3  -7   1   29.48    1.11 
   3  -7  -1   29.50    1.18 
   3  -7  -1   31.34    1.10 
  -3  -7   1   29.75    1.12 
   3  -7  -1   32.11    1.20 
  -3  -7   1   30.73    1.04 
   3  -7  -1   29.38    1.05 
  -3  -7   1   29.76    1.05 
   3   7  -1   28.73    1.01 
  -3   7   1   30.79    1.17 
  -3   7   1   27.98    1.08 
  -3   7   1   29.33    1.00 
   3   7  -1   29.51    0.91 
   3   7  -1   28.20    1.06 
   3   7  -1   27.58    1.05 
  -3   7   1   31.23    1.17 
  -2  -7   1   15.66    0.71 
   2  -7  -1   16.77    0.72 
   2  -7  -1   16.67    0.84 
   2  -7  -1   17.61    0.84 
  -2  -7   1   17.07    0.80 
  -2  -7   1   16.63    0.76 
  -2  -7   1   16.88    0.80 
  -2  -7   1   17.92    0.75 
   2  -7  -1   17.48    0.78 
   2  -7  -1   17.19    0.75 
   2   7  -1   18.10    0.80 
   2   7  -1   17.91    0.80 
  -2   7   1   16.69    0.68 
   2   7  -1   17.15    0.65 
   2   7  -1   16.79    0.73 
  -2   7   1   17.47    0.83 
  -2   7   1   17.95    0.79 
  -2   7   1   17.43    0.83 
  -1  -7   1   68.76    1.84 
   1  -7  -1   68.53    1.90 
   1  -7  -1   65.69    1.81 
  -1  -7   1   68.16    1.96 
   1  -7  -1   65.87    1.84 
  -1  -7   1   65.54    1.92 
  -1  -7   1   64.77    1.86 
   1  -7  -1   63.33    1.95 
   1  -7  -1   68.27    1.97 
  -1  -7   1   64.78    1.81 
  -1   7   1   71.21    1.98 
  -1   7   1   65.49    1.71 
  -1   7   1   64.78    1.85 
   1   7  -1   65.78    1.72 
   1   7  -1   67.12    1.91 
   1   7  -1   63.83    1.90 
   1   7  -1   68.67    1.85 
  -1   7   1   68.73    1.95 
   0  -7   1   17.73    0.85 
   0  -7  -1   17.60    0.76 
   0  -7  -1   17.64    0.84 
   0  -7   1   19.35    0.78 
   0  -7  -1   17.95    0.80 
   0  -7  -1   19.73    0.89 
   0  -7   1   17.62    0.74 
   0  -7  -1   18.31    0.77 
   0  -7   1   19.75    0.87 
   0  -7   1   18.30    0.79 
   0   7  -1   17.93    0.82 
   0   7   1   19.37    0.79 
   0   7  -1   18.61    0.79 
   0   7   1   19.86    0.85 
   0   7   1   18.30    0.84 
   0   7   1   17.28    0.66 
   0   7  -1   19.62    0.86 
   0   7  -1   20.04    0.74 
  -1  -7  -1   60.00    1.78 
  -1  -7  -1   60.52    1.73 
   1  -7   1   61.40    1.76 
   1  -7   1   62.19    1.85 
   1  -7   1   62.77    1.70 
  -1  -7  -1   58.98    1.81 
  -1  -7  -1   59.65    1.81 
   1  -7   1   60.98    1.86 
  -1  -7  -1   61.94    1.74 
   1  -7   1   62.88    1.73 
   1   7   1   60.62    1.80 
  -1   7  -1   63.51    1.79 
   1   7   1   63.04    1.56 
  -1   7  -1   60.94    1.67 
   1   7   1   61.40    1.79 
  -1   7  -1   62.52    1.84 
  -1   7  -1   58.90    1.82 
   1   7   1   62.84    1.72 
  -2  -7  -1    9.59    0.55 
  -2  -7  -1   11.02    0.62 
   2  -7   1   10.24    0.63 
  -2  -7  -1   10.59    0.57 
   2  -7   1    9.32    0.61 
  -2  -7  -1    9.15    0.57 
   2  -7   1   10.44    0.53 
   2  -7   1   10.95    0.57 
  -2  -7  -1   10.14    0.60 
   2  -7   1   10.66    0.58 
  -2   7  -1    9.78    0.53 
   2   7   1   11.51    0.63 
   2   7   1   10.16    0.58 
   2   7   1   11.17    0.56 
  -2   7  -1    8.96    0.60 
  -2   7  -1   10.02    0.58 
   2   7   1   10.66    0.45 
  -2   7  -1   11.07    0.64 
  -3  -7  -1   62.84    1.77 
   3  -7   1   62.22    1.79 
   3  -7   1   60.00    1.91 
   3  -7   1   61.40    1.90 
  -3  -7  -1   63.49    1.81 
  -3  -7  -1   65.03    1.85 
  -3  -7  -1   65.10    1.87 
   3  -7   1   66.38    1.73 
  -3  -7  -1   59.50    1.81 
   3  -7   1   65.25    1.79 
  -3   7  -1   66.73    1.93 
  -3   7  -1   65.07    1.93 
   3   7   1   61.04    1.82 
   3   7   1   61.00    1.70 
   3   7   1   64.46    1.55 
  -3   7  -1   62.30    1.84 
  -3   7  -1   63.94    1.78 
   3   7   1   62.70    1.79 
   4  -7   1    1.47    0.26 
  -4  -7  -1    1.34    0.26 
  -4  -7  -1    1.60    0.28 
   4  -7   1    1.39    0.31 
   4  -7   1    1.52    0.27 
  -4  -7  -1    1.51    0.27 
  -4  -7  -1    1.99    0.31 
  -4  -7  -1    1.25    0.26 
   4  -7   1    1.61    0.33 
   4  -7   1    1.69    0.25 
  -4   7  -1    1.34    0.30 
  -4   7  -1    1.71    0.30 
   4   7   1    1.42    0.18 
   4   7   1    1.56    0.24 
  -4   7  -1    1.99    0.36 
   4   7   1    1.38    0.26 
  -4   7  -1    1.21    0.27 
  -5  -7  -1   21.71    0.92 
   5  -7   1   20.47    0.84 
   5  -7   1   19.89    0.93 
   5  -7   1   19.13    0.76 
  -5  -7  -1   20.98    0.90 
  -5  -7  -1   20.38    0.84 
  -5  -7  -1   22.34    0.91 
  -5  -7  -1   21.25    0.87 
  -5  -7  -1   20.34    0.87 
   5  -7   1   21.24    0.98 
   5  -7   1   20.01    0.83 
   5   7   1   20.81    0.78 
   5   7   1   20.97    0.83 
   5   7   1   20.73    0.65 
  -5   7  -1   18.58    0.91 
  -5   7  -1   20.83    0.96 
  -5   7  -1   20.53    0.88 
  -5   7  -1   20.20    0.92 
   6  -7   1    0.66    0.20 
   6  -7   1    0.34    0.15 
  -6  -7  -1    0.55    0.20 
   6  -7   1    0.60    0.24 
   6  -7   1    0.52    0.18 
  -6  -7  -1    0.67    0.19 
   6  -7   1    0.19    0.19 
  -6  -7  -1    0.36    0.16 
  -6  -7  -1    0.54    0.19 
  -6  -7  -1    0.74    0.20 
  -6   7  -1    0.61    0.23 
   6   7   1    0.44    0.17 
  -6   7  -1    0.44    0.19 
  -6   7  -1    0.63    0.22 
  -6   7  -1    0.11    0.17 
   6   7   1    0.54    0.13 
   6   7   1    0.46    0.17 
  -7  -7  -1    2.61    0.36 
   7  -7   1    2.64    0.41 
  -7  -7  -1    2.33    0.33 
  -7  -7  -1    2.56    0.38 
   7  -7   1    2.27    0.33 
  -7  -7  -1    2.10    0.31 
  -7  -7  -1    1.91    0.33 
   7  -7   1    2.07    0.32 
   7  -7   1    2.44    0.30 
   7  -7   1    1.87    0.37 
  -7   7  -1    2.25    0.38 
  -7   7  -1    3.08    0.43 
  -7   7  -1    2.09    0.37 
  -7   7  -1    2.16    0.38 
   7   7   1    1.99    0.27 
   7   7   1    2.36    0.24 
   8  -7   1    2.05    0.37 
   8  -7   1    1.78    0.26 
  -8  -7  -1    2.62    0.37 
  -8  -7  -1    2.12    0.35 
  -8  -7  -1    1.93    0.32 
   8  -7   1    2.02    0.32 
  -8  -7  -1    1.66    0.28 
  -8  -7  -1    1.78    0.30 
   8  -7   1    1.89    0.30 
  -8   7  -1    1.78    0.37 
   8   7   1    2.00    0.28 
  -8   7  -1    2.35    0.30 
  -8   7  -1    1.73    0.34 
  -8   7  -1    2.00    0.38 
  -9  -7  -1   16.80    0.74 
  -9  -7  -1   17.38    0.82 
   9  -7   1   17.55    0.76 
   9  -7   1   16.50    0.91 
  -9  -7  -1   15.80    0.76 
   9  -7   1   15.82    0.76 
  -9  -7  -1   16.82    0.83 
   9  -7   1   16.90    0.68 
  -9  -7  -1   16.62    0.82 
  -9  -7  -1   16.48    0.75 
  -9   7  -1   17.52    0.91 
   9   7   1   17.91    0.71 
  -9   7  -1   17.23    0.91 
  -9   7  -1   17.97    0.75 
  -9   7  -1   16.66    0.90 
 -10  -7  -1    5.75    0.42 
 -10  -7  -1    6.10    0.61 
  10  -7   1    5.56    0.43 
 -10  -7  -1    6.45    0.60 
 -10  -7  -1    5.59    0.52 
  10  -7   1    5.62    0.37 
 -10  -7  -1    5.84    0.58 
  10  -7   1    6.18    0.47 
 -10  -7  -1    6.23    0.45 
  10  -7   1    6.71    0.71 
 -10   7  -1    6.53    0.70 
 -10   7  -1    5.46    0.62 
 -10   7  -1    5.46    0.43 
 -10   7  -1    5.06    0.59 
  10   7   1    5.88    0.41 
  11  -7   1   15.59    0.93 
 -11  -7  -1   18.28    0.87 
  11  -7   1   17.61    0.81 
 -11  -7  -1   18.44    0.78 
 -11  -7  -1   15.73    0.83 
 -11  -7  -1   15.87    0.86 
  11  -7   1   18.40    0.78 
  11  -7   1   16.39    0.67 
 -11  -7  -1   17.47    0.73 
 -11  -7  -1   16.62    0.78 
 -11   7  -1   17.92    0.98 
  11   7   1   16.14    0.70 
 -11   7  -1   18.26    0.83 
 -11   7  -1   18.29    0.98 
 -11   7  -1   17.33    0.95 
 -12  -7  -1   27.19    1.07 
 -12  -7  -1   28.48    0.98 
 -12  -7  -1   27.26    1.02 
  12  -7   1   28.21    1.28 
 -12  -7  -1   29.50    1.17 
  12  -7   1   29.15    1.04 
 -12  -7  -1   27.85    1.13 
  12  -7   1   29.53    1.10 
 -12  -7  -1   27.24    1.21 
 -12   7  -1   29.08    1.33 
 -12   7  -1   28.19    1.26 
 -12   7  -1   28.10    1.25 
 -12   7  -1   28.63    1.14 
 -12   7  -1   28.40    1.28 
  12   7   1   27.80    0.99 
  13  -7   1    0.33    0.19 
 -13  -7  -1    0.56    0.18 
 -13  -7  -1    0.94    0.26 
 -13  -7  -1    0.12    0.19 
 -13  -7  -1    0.26    0.22 
 -13  -7  -1    0.49    0.17 
 -13  -7  -1    0.41    0.20 
 -13   7  -1    0.72    0.28 
 -13   7  -1    0.14    0.23 
 -13   7  -1    0.18    0.24 
 -13   7  -1    0.17    0.23 
 -13   7  -1    0.24    0.20 
 -14  -7  -1   26.22    1.14 
 -14  -7  -1   26.80    1.11 
 -14  -7  -1   26.07    1.25 
 -14  -7  -1   25.36    0.88 
  14  -7   1   27.46    1.07 
 -14  -7  -1   26.92    0.98 
 -14   7  -1   25.84    1.25 
 -14   7  -1   26.25    1.31 
 -14   7  -1   28.18    1.29 
 -14   7  -1   26.90    1.23 
 -14   7  -1   25.30    1.14 
  15  -7   1    7.94    0.55 
 -15  -7  -1    8.35    0.43 
 -15  -7  -1    9.23    0.66 
 -15  -7  -1    7.53    0.49 
 -15  -7  -1    7.54    0.79 
 -15   7  -1    7.87    0.79 
 -15   7  -1    7.85    0.88 
 -15   7  -1    8.11    0.80 
 -15   7  -1    8.77    0.73 
 -15   7  -1    8.33    0.66 
 -16  -7  -1   18.27    0.63 
 -16  -7  -1   19.14    0.65 
 -16  -7  -1   19.72    0.99 
  16  -7   1   21.14    0.93 
 -16  -7  -1   20.73    1.15 
 -16   7  -1   19.85    1.11 
 -16   7  -1   18.99    1.18 
 -16   7  -1   18.45    1.04 
 -16   7  -1   19.96    1.06 
 -16   7  -1   19.62    1.10 
 -17  -7  -1    5.88    0.77 
 -17   7  -1    3.73    0.58 
 -17   7  -1    4.32    0.71 
 -17   7  -1    3.94    0.62 
 -17   7  -1    3.89    0.59 
 -18  -7  -1    0.30    0.30 
 -18   7  -1    0.64    0.34 
 -18   7  -1    1.01    0.35 
 -18   7  -1    0.33    0.29 
 -18   7  -1    1.26    0.41 
 -19  -7  -1   -0.41    0.21 
 -19   7  -1    0.05    0.28 
 -19   7  -1   -0.12    0.23 
 -19   7  -1   -0.06    0.23 
 -19   7  -1   -0.14    0.23 
 -20  -7  -1    6.12    0.84 
 -20   7  -1    5.84    0.78 
 -20   7  -1    5.91    0.77 
 -20   7  -1    4.71    0.71 
 -20   7  -1    6.33    0.91 
 -21  -7  -1    0.39    0.35 
 -21   7  -1    1.05    0.41 
 -21   7  -1    0.85    0.42 
 -21   7  -1    0.05    0.31 
 -21   7  -1    0.11    0.27 
 -22  -7  -1    0.00    0.34 
 -22   7  -1   -0.12    0.27 
 -22   7  -1    0.26    0.41 
 -22   7  -1    0.09    0.26 
 -23  -7  -1    2.89    0.67 
 -23   7  -1    1.77    0.60 
 -23   7  -1    2.94    0.61 
 -23   7  -1    3.26    0.59 
 -24  -7  -1    0.41    0.43 
 -24   7  -1    0.23    0.38 
 -24   7  -1   -0.22    0.24 
 -24   7  -1   -0.11    0.32 
 -24  -8   1    1.68    0.55 
 -24   8   1    1.07    0.46 
 -24   8   1    0.70    0.49 
 -23  -8   1   18.29    1.31 
 -23   8   1   18.10    1.35 
 -23   8   1   22.66    1.36 
 -23   8   1   21.46    1.36 
 -22  -8   1    5.25    0.85 
 -22   8   1    5.04    0.77 
 -22   8   1    4.39    0.81 
 -22   8   1    6.91    0.91 
 -21  -8   1   20.30    1.29 
 -21   8   1   19.97    1.35 
 -21   8   1   20.55    1.28 
 -21   8   1   20.61    1.31 
 -20  -8   1    1.69    0.49 
 -20   8   1    1.60    0.47 
 -20   8   1    2.08    0.50 
 -20   8   1    2.19    0.56 
 -20   8   1    1.66    0.47 
 -19  -8   1   16.85    0.62 
 -19  -8   1   18.71    1.19 
 -19   8   1   17.60    1.15 
 -19   8   1   17.20    1.10 
 -19   8   1   16.56    1.13 
 -19   8   1   16.80    1.20 
 -18  -8   1    4.79    0.71 
 -18  -8   1    5.03    0.66 
 -18  -8   1    5.56    0.39 
 -18   8   1    4.79    0.77 
 -18   8   1    5.72    0.74 
 -18   8   1    5.25    0.73 
 -18   8   1    5.57    0.74 
 -18   8   1    6.15    0.79 
 -17  -8   1   26.43    1.33 
  17  -8  -1   22.59    1.07 
 -17  -8   1   23.75    0.89 
 -17  -8   1   26.60    1.25 
 -17   8   1   23.43    1.32 
 -17   8   1   24.88    1.35 
 -17   8   1   24.48    1.31 
 -17   8   1   24.51    1.24 
 -17   8   1   23.77    1.35 
 -16  -8   1   10.52    0.58 
 -16  -8   1   11.83    0.86 
 -16  -8   1   10.70    0.66 
 -16  -8   1   10.43    0.78 
  16  -8  -1    9.87    0.66 
 -16   8   1    9.95    0.76 
 -16   8   1   11.33    0.90 
 -16   8   1   10.54    1.01 
 -16   8   1    8.86    0.93 
 -16   8   1   10.04    0.85 
  15  -8  -1   19.03    0.92 
 -15  -8   1   20.68    0.93 
 -15  -8   1   20.17    0.99 
 -15  -8   1   19.11    1.04 
 -15  -8   1   18.64    1.06 
 -15  -8   1   19.33    0.83 
 -15   8   1   19.88    1.17 
 -15   8   1   18.31    1.10 
 -15   8   1   18.06    1.11 
 -15   8   1   19.21    1.01 
 -15   8   1   19.72    1.16 
 -14  -8   1   29.51    1.16 
 -14  -8   1   29.21    1.09 
  14  -8  -1   31.38    1.20 
 -14  -8   1   27.77    1.26 
 -14  -8   1   29.40    1.31 
 -14  -8   1   30.63    1.25 
 -14   8   1   28.61    1.40 
 -14   8   1   29.51    1.41 
 -14   8   1   31.76    1.29 
 -14   8   1   29.25    1.42 
 -14   8   1   28.97    1.39 
 -13  -8   1   28.74    1.14 
 -13  -8   1   27.25    1.06 
 -13  -8   1   29.68    1.21 
 -13  -8   1   26.34    1.21 
  13  -8  -1   29.78    1.16 
  13  -8  -1   30.27    1.15 
  13  -8  -1   27.33    1.36 
 -13  -8   1   31.17    1.29 
 -13   8   1   30.04    1.39 
 -13   8   1   28.81    1.20 
 -13   8   1   25.74    1.30 
  13   8  -1   27.60    1.07 
 -13   8   1   29.63    1.39 
 -13   8   1   27.88    1.36 
 -12  -8   1    4.52    0.56 
 -12  -8   1    6.20    0.58 
 -12  -8   1    4.02    0.52 
  12  -8  -1    4.94    0.54 
 -12  -8   1    5.65    0.61 
 -12  -8   1    3.80    0.43 
  12  -8  -1    5.78    0.58 
 -12  -8   1    4.34    0.50 
  12  -8  -1    5.20    0.71 
 -12   8   1    4.57    0.52 
  12   8  -1    5.21    0.52 
 -12   8   1    4.67    0.62 
 -12   8   1    4.88    0.64 
 -12   8   1    4.67    0.66 
 -12   8   1    5.70    0.68 
  11  -8  -1   35.52    1.27 
 -11  -8   1   33.30    1.26 
  11  -8  -1   34.73    1.27 
 -11  -8   1   32.58    1.28 
 -11  -8   1   35.97    1.34 
  11  -8  -1   33.07    1.10 
  11  -8  -1   30.63    1.44 
 -11  -8   1   34.07    1.22 
 -11  -8   1   35.43    1.39 
 -11  -8   1   33.14    1.21 
 -11   8   1   31.19    1.37 
  11   8  -1   34.56    1.20 
 -11   8   1   34.64    1.49 
 -11   8   1   36.63    1.27 
 -11   8   1   33.88    1.47 
 -10  -8   1    0.07    0.17 
 -10  -8   1    0.05    0.16 
  10  -8  -1    0.10    0.23 
 -10  -8   1    0.08    0.14 
  10  -8  -1    0.04    0.17 
 -10  -8   1   -0.09    0.15 
  10  -8  -1   -0.20    0.14 
 -10  -8   1    0.17    0.21 
  10  -8  -1    0.00    0.13 
 -10  -8   1    0.18    0.18 
 -10   8   1   -0.10    0.18 
  10   8  -1    0.35    0.18 
 -10   8   1    0.13    0.20 
 -10   8   1   -0.02    0.19 
  -9  -8   1    3.19    0.47 
  -9  -8   1    4.07    0.48 
  -9  -8   1    4.00    0.45 
   9  -8  -1    4.34    0.48 
   9  -8  -1    3.74    0.57 
  -9  -8   1    3.81    0.48 
  -9  -8   1    4.02    0.52 
   9  -8  -1    4.40    0.43 
  -9  -8   1    4.38    0.48 
   9  -8  -1    3.14    0.43 
  -9   8   1    3.77    0.56 
  -9   8   1    4.60    0.56 
   9   8  -1    4.85    0.48 
  -9   8   1    4.72    0.61 
  -8  -8   1    0.93    0.25 
  -8  -8   1    1.37    0.32 
   8  -8  -1    1.01    0.31 
  -8  -8   1    1.34    0.30 
  -8  -8   1    0.48    0.20 
  -8  -8   1    0.70    0.23 
   8  -8  -1    1.24    0.29 
   8  -8  -1    1.06    0.24 
   8  -8  -1    1.65    0.32 
  -8  -8   1    0.77    0.28 
  -8   8   1    1.13    0.34 
   8   8  -1    1.12    0.21 
   8   8  -1    1.00    0.23 
  -8   8   1    0.79    0.32 
  -8   8   1    0.95    0.28 
   7  -8  -1   41.15    1.43 
   7  -8  -1   39.51    1.57 
   7  -8  -1   45.12    1.35 
  -7  -8   1   42.01    1.47 
   7  -8  -1   38.38    1.58 
   7  -8  -1   44.10    1.44 
  -7  -8   1   44.82    1.49 
  -7  -8   1   42.40    1.52 
  -7  -8   1   41.56    1.44 
  -7  -8   1   41.06    1.37 
  -7  -8   1   43.18    1.48 
  -7   8   1   45.96    1.63 
   7   8  -1   42.94    1.22 
  -7   8   1   43.23    1.62 
  -7   8   1   44.46    1.50 
   7   8  -1   41.85    1.48 
   7   8  -1   43.32    1.37 
   6  -8  -1    4.56    0.59 
   6  -8  -1    4.63    0.59 
   6  -8  -1    6.18    0.43 
  -6  -8   1    5.58    0.56 
   6  -8  -1    5.68    0.58 
  -6  -8   1    5.73    0.58 
  -6  -8   1    5.76    0.59 
   6  -8  -1    5.42    0.53 
  -6  -8   1    6.25    0.56 
  -6  -8   1    6.30    0.60 
  -6  -8   1    5.48    0.56 
  -6   8   1    5.57    0.56 
  -6   8   1    5.80    0.64 
   6   8  -1    5.23    0.45 
   6   8  -1    5.68    0.51 
  -6   8   1    6.09    0.67 
   6   8  -1    6.11    0.37 
   5  -8  -1   20.75    1.05 
   5  -8  -1   20.18    0.90 
  -5  -8   1   24.34    1.01 
   5  -8  -1   19.65    0.92 
  -5  -8   1   22.55    0.98 
  -5  -8   1   22.47    1.00 
   5  -8  -1   21.99    0.87 
  -5  -8   1   23.75    1.03 
  -5  -8   1   21.37    0.90 
   5  -8  -1   22.55    1.07 
  -5  -8   1   21.62    0.94 
  -5   8   1   23.12    1.08 
   5   8  -1   22.80    0.78 
  -5   8   1   23.79    1.08 
   5   8  -1   21.92    0.93 
   5   8  -1   21.86    0.89 
  -5   8   1   21.00    1.00 
  -5   8   1   22.63    0.94 
  -4  -8   1    0.43    0.21 
   4  -8  -1    0.42    0.23 
  -4  -8   1    0.25    0.18 
  -4  -8   1    0.25    0.19 
   4  -8  -1    0.30    0.18 
  -4  -8   1    0.40    0.19 
  -4  -8   1    0.28    0.20 
  -4  -8   1    0.29    0.19 
   4  -8  -1    0.40    0.22 
   4  -8  -1    0.36    0.19 
   4  -8  -1    0.22    0.17 
  -4   8   1    0.35    0.20 
   4   8  -1    0.31    0.18 
  -4   8   1    0.21    0.17 
  -4   8   1    0.34    0.23 
   4   8  -1    0.11    0.15 
   4   8  -1    0.32    0.14 
  -4   8   1    0.58    0.24 
  -3  -8   1    1.60    0.29 
   3  -8  -1    1.24    0.30 
  -3  -8   1    1.56    0.30 
  -3  -8   1    2.00    0.35 
   3  -8  -1    1.24    0.28 
   3  -8  -1    1.80    0.38 
   3  -8  -1    1.64    0.28 
   3  -8  -1    1.26    0.28 
  -3  -8   1    1.68    0.33 
  -3  -8   1    1.46    0.29 
   3   8  -1    1.90    0.32 
  -3   8   1    1.81    0.33 
   3   8  -1    1.66    0.26 
  -3   8   1    2.09    0.32 
  -3   8   1    1.75    0.34 
  -3   8   1    1.56    0.35 
   3   8  -1    1.55    0.30 
   2  -8  -1    7.94    0.56 
   2  -8  -1    6.56    0.55 
  -2  -8   1    6.46    0.53 
  -2  -8   1    7.32    0.50 
  -2  -8   1    7.40    0.56 
   2  -8  -1    7.19    0.50 
  -2  -8   1    6.94    0.53 
   2  -8  -1    6.79    0.48 
   2  -8  -1    7.32    0.58 
  -2  -8   1    5.91    0.46 
  -2   8   1    7.29    0.54 
   2   8  -1    6.26    0.47 
   2   8  -1    7.46    0.43 
   2   8  -1    6.50    0.51 
  -2   8   1    6.56    0.64 
  -2   8   1    7.29    0.46 
  -2   8   1    7.78    0.58 
  -1  -8   1    2.19    0.38 
  -1  -8   1    2.26    0.33 
   1  -8  -1    2.03    0.32 
  -1  -8   1    1.77    0.32 
  -1  -8   1    2.01    0.32 
   1  -8  -1    1.88    0.34 
   1  -8  -1    2.80    0.44 
  -1  -8   1    2.09    0.36 
   1  -8  -1    1.88    0.38 
   1  -8  -1    2.29    0.36 
   1   8  -1    2.10    0.35 
  -1   8   1    2.15    0.35 
  -1   8   1    2.65    0.32 
   1   8  -1    1.91    0.32 
  -1   8   1    2.48    0.42 
  -1   8   1    2.82    0.42 
   1   8  -1    1.79    0.27 
   1   8  -1    2.13    0.35 
   0  -8   1    1.26    0.28 
   0  -8  -1    1.48    0.30 
   0  -8  -1    1.34    0.31 
   0  -8   1    2.12    0.33 
   0  -8   1    1.14    0.28 
   0  -8   1    1.91    0.37 
   0  -8  -1    1.29    0.31 
   0  -8  -1    1.62    0.29 
   0  -8   1    1.76    0.30 
   0  -8  -1    1.78    0.34 
   0   8   1    1.88    0.27 
   0   8   1    1.20    0.30 
   0   8  -1    1.59    0.27 
   0   8  -1    1.67    0.33 
   0   8  -1    1.59    0.33 
   0   8   1    1.29    0.28 
   0   8  -1    1.99    0.34 
   0   8   1    1.61    0.29 
  -1  -8  -1    7.69    0.58 
   1  -8   1    7.62    0.50 
   1  -8   1    8.88    0.58 
  -1  -8  -1    8.10    0.60 
   1  -8   1    8.06    0.53 
  -1  -8  -1    6.55    0.49 
   1  -8   1    6.87    0.57 
  -1  -8  -1    8.07    0.56 
   1  -8   1    9.59    0.64 
  -1  -8  -1    9.14    0.56 
   1   8   1    7.03    0.54 
  -1   8  -1    7.76    0.49 
  -1   8  -1    7.67    0.57 
   1   8   1    8.41    0.53 
  -1   8  -1    8.69    0.57 
  -1   8  -1    7.77    0.58 
   1   8   1    8.15    0.43 
   2  -8   1    1.49    0.34 
  -2  -8  -1    1.59    0.31 
   2  -8   1    1.66    0.30 
  -2  -8  -1    1.76    0.33 
  -2  -8  -1    1.16    0.27 
   2  -8   1    1.75    0.32 
   2  -8   1    1.97    0.34 
  -2  -8  -1    1.33    0.31 
  -2  -8  -1    2.00    0.36 
   2  -8   1    1.73    0.37 
  -2   8  -1    1.90    0.36 
   2   8   1    1.76    0.24 
   2   8   1    1.57    0.32 
   2   8   1    1.67    0.29 
  -2   8  -1    1.59    0.29 
  -2   8  -1    1.53    0.35 
  -2   8  -1    1.50    0.30 
  -3  -8  -1    3.16    0.44 
  -3  -8  -1    3.93    0.48 
   3  -8   1    3.06    0.39 
   3  -8   1    3.32    0.39 
  -3  -8  -1    3.26    0.42 
  -3  -8  -1    2.87    0.41 
   3  -8   1    2.46    0.38 
   3  -8   1    2.94    0.44 
  -3  -8  -1    3.02    0.41 
   3  -8   1    2.88    0.46 
  -3   8  -1    3.23    0.47 
  -3   8  -1    2.70    0.42 
   3   8   1    3.38    0.31 
   3   8   1    3.17    0.39 
  -3   8  -1    3.13    0.43 
  -3   8  -1    2.53    0.35 
   3   8   1    3.61    0.44 
  -4  -8  -1    5.27    0.54 
   4  -8   1    5.16    0.60 
   4  -8   1    5.98    0.57 
   4  -8   1    4.99    0.59 
   4  -8   1    5.49    0.54 
  -4  -8  -1    5.13    0.52 
  -4  -8  -1    5.71    0.59 
  -4  -8  -1    4.69    0.52 
   4  -8   1    4.59    0.45 
  -4  -8  -1    4.84    0.49 
  -4   8  -1    4.54    0.55 
  -4   8  -1    4.91    0.54 
   4   8   1    5.18    0.32 
  -4   8  -1    6.16    0.63 
   4   8   1    5.47    0.53 
   4   8   1    5.22    0.48 
  -4   8  -1    5.58    0.55 
  -5  -8  -1    1.63    0.36 
  -5  -8  -1    1.39    0.29 
  -5  -8  -1    1.56    0.32 
   5  -8   1    1.74    0.29 
  -5  -8  -1    1.65    0.33 
   5  -8   1    1.32    0.29 
   5  -8   1    2.04    0.40 
   5  -8   1    1.42    0.29 
   5  -8   1    2.30    0.44 
  -5  -8  -1    1.60    0.32 
  -5   8  -1    1.73    0.37 
   5   8   1    1.84    0.22 
   5   8   1    1.79    0.29 
  -5   8  -1    2.00    0.36 
  -5   8  -1    2.20    0.40 
  -5   8  -1    1.50    0.34 
   5   8   1    1.71    0.30 
   6  -8   1    0.35    0.22 
   6  -8   1    0.67    0.21 
  -6  -8  -1    0.32    0.18 
  -6  -8  -1    0.40    0.20 
  -6  -8  -1    0.69    0.26 
   6  -8   1    0.58    0.20 
  -6  -8  -1    0.09    0.16 
   6  -8   1    0.49    0.25 
   6  -8   1    0.67    0.23 
  -6   8  -1    0.48    0.24 
  -6   8  -1    0.32    0.24 
   6   8   1    0.37    0.17 
  -6   8  -1    0.50    0.25 
  -6   8  -1    0.43    0.23 
   7  -8   1    7.36    0.53 
   7  -8   1    6.21    0.50 
  -7  -8  -1    7.23    0.53 
  -7  -8  -1    8.26    0.60 
   7  -8   1    7.71    0.48 
  -7  -8  -1    6.40    0.50 
  -7  -8  -1    7.63    0.56 
  -7  -8  -1    7.57    0.69 
   7  -8   1    7.32    0.62 
  -7   8  -1    7.07    0.72 
  -7   8  -1    6.99    0.69 
  -7   8  -1    8.05    0.61 
   7   8   1    7.04    0.47 
  -7   8  -1    6.18    0.66 
   8  -8   1    0.15    0.14 
  -8  -8  -1   -0.21    0.11 
  -8  -8  -1   -0.13    0.15 
   8  -8   1    0.03    0.17 
  -8  -8  -1   -0.05    0.14 
   8  -8   1   -0.03    0.14 
  -8  -8  -1    0.03    0.15 
   8  -8   1    0.01    0.13 
  -8  -8  -1   -0.02    0.13 
   8   8   1    0.15    0.14 
  -8   8  -1    0.22    0.21 
  -8   8  -1   -0.28    0.16 
  -8   8  -1    0.01    0.18 
  -9  -8  -1   18.20    0.92 
   9  -8   1   15.58    0.80 
  -9  -8  -1   17.22    0.88 
  -9  -8  -1   15.48    0.79 
   9  -8   1   16.53    0.96 
  -9  -8  -1   15.81    0.78 
  -9  -8  -1   17.31    0.83 
   9  -8   1   17.26    0.73 
   9  -8   1   16.14    0.80 
  -9   8  -1   16.06    0.92 
  -9   8  -1   16.82    0.74 
   9   8   1   16.93    0.73 
  -9   8  -1   15.66    0.94 
  -9   8  -1   15.49    0.92 
 -10  -8  -1    0.31    0.21 
 -10  -8  -1    0.28    0.18 
  10  -8   1    0.55    0.28 
 -10  -8  -1    0.11    0.18 
 -10  -8  -1    0.23    0.24 
  10  -8   1    0.07    0.18 
  10  -8   1    0.13    0.15 
 -10  -8  -1    0.02    0.19 
  10  -8   1    0.10    0.16 
  10   8   1    0.46    0.19 
 -10   8  -1    0.46    0.20 
 -10   8  -1    0.44    0.26 
 -10   8  -1    0.23    0.24 
 -10   8  -1    0.97    0.33 
  11  -8   1   11.72    0.59 
  11  -8   1   13.21    0.71 
 -11  -8  -1   12.26    0.77 
 -11  -8  -1   13.16    0.73 
 -11  -8  -1   12.69    0.67 
 -11  -8  -1   12.17    0.69 
  11  -8   1   12.95    0.89 
 -11  -8  -1   12.15    0.76 
  11  -8   1   12.04    0.70 
 -11   8  -1   11.03    0.67 
 -11   8  -1   11.11    0.82 
 -11   8  -1   11.95    0.83 
  11   8   1   12.25    0.62 
 -11   8  -1   12.25    0.86 
 -12  -8  -1    8.92    0.60 
 -12  -8  -1    9.38    0.57 
 -12  -8  -1   10.81    0.66 
  12  -8   1    8.59    0.86 
  12  -8   1   10.41    0.66 
  12  -8   1   10.87    0.64 
 -12  -8  -1   10.50    0.72 
 -12  -8  -1   10.51    0.70 
 -12  -8  -1    9.34    0.70 
 -12   8  -1   10.44    0.81 
 -12   8  -1   11.02    0.81 
 -12   8  -1   10.51    0.80 
 -12   8  -1    8.97    0.62 
 -13  -8  -1    2.83    0.36 
 -13  -8  -1    2.69    0.48 
 -13  -8  -1    2.23    0.41 
  13  -8   1    2.63    0.41 
 -13  -8  -1    2.90    0.46 
 -13  -8  -1    3.34    0.43 
 -13   8  -1    2.40    0.50 
 -13   8  -1    2.56    0.51 
 -13   8  -1    3.40    0.49 
 -13   8  -1    2.89    0.51 
 -13   8  -1    2.32    0.47 
  14  -8   1    0.60    0.24 
 -14  -8  -1    0.71    0.32 
 -14  -8  -1    0.35    0.26 
 -14  -8  -1    0.70    0.28 
 -14  -8  -1    0.82    0.22 
 -14   8  -1    0.75    0.29 
 -14   8  -1    0.22    0.28 
 -14   8  -1    0.45    0.27 
 -14   8  -1    0.65    0.33 
 -14   8  -1    0.36    0.29 
 -15  -8  -1    8.21    0.67 
 -15  -8  -1    8.59    0.86 
 -15  -8  -1    8.38    0.56 
  15  -8   1    7.63    0.59 
 -15  -8  -1    6.98    0.46 
 -15   8  -1    7.70    0.85 
 -15   8  -1    5.98    0.81 
 -15   8  -1    7.02    0.79 
 -15   8  -1    8.16    0.83 
 -16  -8  -1    4.84    0.62 
 -16  -8  -1    3.54    0.61 
  16  -8   1    3.46    0.49 
 -16  -8  -1    2.97    0.33 
 -16   8  -1    3.11    0.57 
 -16   8  -1    4.10    0.71 
 -16   8  -1    4.15    0.64 
 -16   8  -1    2.48    0.52 
 -17  -8  -1    2.75    0.28 
 -17  -8  -1    2.78    0.56 
  17  -8   1    2.77    0.49 
 -17   8  -1    2.45    0.57 
 -17   8  -1    1.95    0.48 
 -17   8  -1    3.33    0.59 
 -18  -8  -1    6.80    0.83 
 -18   8  -1    5.65    0.87 
 -18   8  -1    6.43    0.83 
 -18   8  -1    6.49    0.81 
 -19  -8  -1    4.36    0.73 
 -19   8  -1    4.06    0.67 
 -19   8  -1    3.16    0.65 
 -19   8  -1    3.23    0.60 
 -20  -8  -1    1.33    0.50 
 -20   8  -1    0.64    0.46 
 -20   8  -1    0.73    0.38 
 -20   8  -1    0.22    0.31 
 -21  -8  -1    8.43    1.01 
 -21   8  -1   10.21    1.02 
 -21   8  -1    9.58    1.03 
 -21   8  -1   10.78    1.20 
 -22  -8  -1    1.06    0.49 
 -22   8  -1    0.92    0.45 
 -22   8  -1    1.05    0.51 
 -22   8  -1    0.62    0.37 
 -23  -8  -1   15.92    1.22 
 -23   8  -1   12.79    1.37 
 -23   8  -1   13.16    1.05 
 -23   8  -1   14.67    1.13 
 -23  -9   1    0.28    0.41 
 -23   9   1    0.25    0.37 
 -23   9   1    0.39    0.42 
 -22  -9   1    8.36    1.03 
 -22   9   1    7.13    1.00 
 -22   9   1    8.29    1.01 
 -22   9   1    7.75    1.03 
 -21  -9   1    0.18    0.34 
 -21   9   1    0.17    0.34 
 -21   9   1    0.15    0.36 
 -21   9   1    0.03    0.35 
 -20  -9   1    2.17    0.55 
 -20  -9   1    2.59    0.26 
 -20   9   1    2.75    0.64 
 -20   9   1    2.73    0.62 
 -20   9   1    2.28    0.57 
 -19  -9   1    0.56    0.19 
 -19  -9   1    0.24    0.30 
 -19   9   1   -0.18    0.26 
 -19   9   1   -0.11    0.30 
 -19   9   1    0.29    0.34 
 -18  -9   1    6.00    0.78 
 -18  -9   1    4.97    0.67 
 -18  -9   1    5.61    0.45 
 -18   9   1    5.85    0.82 
 -18   9   1    4.20    0.70 
 -18   9   1    6.56    0.90 
 -17  -9   1    2.36    0.53 
 -17  -9   1    2.13    0.34 
 -17  -9   1    2.42    0.50 
  17  -9  -1    1.50    0.37 
 -17   9   1    1.46    0.49 
 -17   9   1    0.98    0.41 
 -17   9   1    2.34    0.56 
 -17   9   1    1.76    0.49 
 -16  -9   1   15.10    0.98 
 -16  -9   1   16.69    0.99 
  16  -9  -1   15.56    0.89 
 -16  -9   1   13.23    0.74 
 -16  -9   1   14.40    0.84 
 -16   9   1   15.05    1.09 
 -16   9   1   15.50    1.10 
 -16   9   1   17.86    1.15 
 -16   9   1   16.16    1.13 
 -15  -9   1    1.31    0.38 
 -15  -9   1    2.18    0.39 
 -15  -9   1    2.03    0.46 
  15  -9  -1    1.80    0.39 
 -15  -9   1    2.25    0.48 
 -15  -9   1    1.86    0.34 
 -15   9   1    1.67    0.48 
 -15   9   1    1.20    0.41 
 -15   9   1    2.27    0.52 
 -15   9   1    1.30    0.43 
 -14  -9   1   16.66    0.98 
 -14  -9   1   15.41    0.80 
  14  -9  -1   17.26    0.92 
 -14  -9   1   14.56    0.91 
 -14  -9   1   16.41    0.89 
 -14  -9   1   16.92    0.95 
 -14   9   1   17.16    1.13 
 -14   9   1   17.68    1.12 
 -14   9   1   16.46    1.08 
 -14   9   1   16.79    1.10 
 -13  -9   1    1.57    0.38 
  13  -9  -1    1.66    0.48 
  13  -9  -1    1.77    0.38 
 -13  -9   1    2.10    0.39 
  13  -9  -1    2.12    0.40 
 -13  -9   1    1.63    0.39 
 -13  -9   1    1.90    0.42 
 -13  -9   1    1.48    0.31 
 -13   9   1    2.51    0.57 
 -13   9   1    2.82    0.56 
 -13   9   1    1.25    0.41 
 -13   9   1    2.02    0.47 
 -12  -9   1   46.94    1.63 
 -12  -9   1   44.62    1.55 
 -12  -9   1   48.13    1.70 
 -12  -9   1   44.16    1.70 
  12  -9  -1   43.18    1.85 
 -12  -9   1   42.97    1.53 
  12  -9  -1   46.79    1.62 
  12  -9  -1   46.30    1.61 
 -12   9   1   47.55    1.82 
 -12   9   1   46.05    1.86 
 -12   9   1   47.04    1.89 
  12   9  -1   46.16    1.51 
 -11  -9   1   13.11    0.82 
 -11  -9   1   10.62    0.70 
 -11  -9   1   12.14    0.83 
  11  -9  -1   11.21    0.72 
 -11  -9   1   11.60    0.72 
  11  -9  -1   12.00    0.92 
 -11  -9   1   11.86    0.76 
  11  -9  -1   11.14    0.73 
  11  -9  -1   12.91    0.68 
 -11   9   1   13.37    0.94 
 -11   9   1   12.04    0.70 
 -11   9   1   12.57    0.85 
 -11   9   1   11.90    0.89 
  11   9  -1   11.56    0.68 
 -10  -9   1   43.61    1.65 
  10  -9  -1   44.76    1.82 
 -10  -9   1   42.37    1.59 
  10  -9  -1   41.95    1.52 
 -10  -9   1   43.21    1.50 
 -10  -9   1   42.50    1.52 
 -10  -9   1   44.07    1.58 
  10  -9  -1   45.36    1.57 
  10  -9  -1   45.29    1.41 
 -10   9   1   42.73    1.77 
 -10   9   1   43.39    1.67 
  10   9  -1   44.54    1.46 
 -10   9   1   43.91    1.77 
  -9  -9   1   19.23    1.00 
   9  -9  -1   20.75    0.98 
  -9  -9   1   19.50    0.98 
  -9  -9   1   18.44    0.94 
   9  -9  -1   19.59    0.85 
  -9  -9   1   20.38    0.95 
  -9  -9   1   19.63    1.00 
  -9  -9   1   21.17    1.06 
   9  -9  -1   19.22    0.95 
   9  -9  -1   20.45    1.16 
   9   9  -1   19.62    0.89 
  -9   9   1   19.77    1.03 
  -9   9   1   19.84    1.12 
  -9   9   1   21.07    1.16 
  -8  -9   1   27.77    1.11 
   8  -9  -1   24.66    1.29 
   8  -9  -1   26.69    1.14 
   8  -9  -1   27.16    1.13 
   8  -9  -1   27.05    1.03 
  -8  -9   1   27.38    1.23 
  -8  -9   1   25.90    1.16 
  -8  -9   1   26.28    1.16 
  -8  -9   1   25.29    1.15 
  -8  -9   1   27.31    1.15 
  -8   9   1   27.11    1.19 
  -8   9   1   25.94    1.30 
   8   9  -1   25.42    1.04 
  -8   9   1   25.97    1.28 
  -7  -9   1    8.80    0.67 
   7  -9  -1    9.94    0.67 
  -7  -9   1    9.52    0.68 
   7  -9  -1    8.81    0.75 
  -7  -9   1    9.15    0.66 
  -7  -9   1    9.60    0.63 
   7  -9  -1    8.17    0.55 
   7  -9  -1    9.66    0.65 
  -7  -9   1    9.06    0.68 
  -7  -9   1   10.70    0.72 
  -7   9   1    9.25    0.74 
   7   9  -1    8.83    0.58 
  -7   9   1   10.11    0.77 
  -7   9   1    8.55    0.63 
  -6  -9   1   40.60    1.42 
  -6  -9   1   40.84    1.54 
   6  -9  -1   40.60    1.36 
  -6  -9   1   38.33    1.46 
   6  -9  -1   41.83    1.65 
   6  -9  -1   39.26    1.43 
  -6  -9   1   41.46    1.51 
  -6  -9   1   40.81    1.52 
   6  -9  -1   42.60    1.68 
   6  -9  -1   43.56    1.51 
  -6  -9   1   38.62    1.45 
  -6   9   1   41.80    1.64 
   6   9  -1   39.17    1.37 
  -6   9   1   39.75    1.44 
  -6   9   1   41.53    1.62 
  -5  -9   1    0.20    0.20 
   5  -9  -1    0.17    0.19 
   5  -9  -1    0.01    0.19 
  -5  -9   1    0.13    0.19 
  -5  -9   1    0.27    0.20 
   5  -9  -1    0.28    0.24 
   5  -9  -1    0.43    0.22 
  -5  -9   1   -0.13    0.15 
  -5  -9   1    0.34    0.20 
   5  -9  -1    0.55    0.27 
  -5   9   1   -0.02    0.20 
   5   9  -1    0.15    0.20 
  -5   9   1    0.17    0.19 
  -5   9   1    0.15    0.22 
   5   9  -1   -0.01    0.12 
   5   9  -1    0.38    0.21 
  -5   9   1    0.02    0.19 
   4  -9  -1   41.70    1.41 
  -4  -9   1   42.23    1.55 
  -4  -9   1   40.91    1.55 
   4  -9  -1   41.45    1.46 
  -4  -9   1   40.26    1.50 
   4  -9  -1   41.47    1.50 
   4  -9  -1   43.93    1.69 
   4  -9  -1   43.76    1.66 
  -4  -9   1   41.93    1.48 
  -4  -9   1   41.74    1.45 
   4   9  -1   41.53    1.26 
   4   9  -1   42.03    1.43 
   4   9  -1   42.09    1.49 
  -4   9   1   43.09    1.62 
  -4   9   1   41.76    1.41 
  -4   9   1   40.17    1.53 
  -4   9   1   44.89    1.65 
   3  -9  -1   14.34    0.78 
  -3  -9   1   16.52    0.83 
   3  -9  -1   14.84    0.83 
   3  -9  -1   15.60    0.78 
   3  -9  -1   14.82    0.90 
  -3  -9   1   15.79    0.88 
   3  -9  -1   14.62    0.91 
  -3  -9   1   15.68    0.85 
  -3  -9   1   15.36    0.79 
  -3  -9   1   15.16    0.87 
  -3   9   1   13.98    0.85 
   3   9  -1   16.36    0.81 
   3   9  -1   15.05    0.83 
  -3   9   1   14.24    0.83 
  -3   9   1   15.15    0.74 
   3   9  -1   15.64    0.68 
   2  -9  -1   25.72    1.06 
  -2  -9   1   24.66    1.03 
  -2  -9   1   23.36    1.11 
   2  -9  -1   23.35    1.08 
  -2  -9   1   23.74    1.02 
   2  -9  -1   25.59    1.20 
  -2  -9   1   23.60    1.07 
   2  -9  -1   26.14    1.05 
  -2  -9   1   23.45    1.12 
   2  -9  -1   25.41    1.18 
   2   9  -1   24.86    1.10 
  -2   9   1   22.61    1.10 
   2   9  -1   23.99    0.90 
  -2   9   1   26.40    1.11 
  -2   9   1   24.80    0.95 
   2   9  -1   21.51    0.98 
  -1  -9   1   25.96    1.19 
   1  -9  -1   25.58    1.07 
  -1  -9   1   27.90    1.09 
   1  -9  -1   26.30    1.13 
  -1  -9   1   26.17    1.13 
   1  -9  -1   23.52    1.17 
   1  -9  -1   26.10    1.07 
   1  -9  -1   25.55    1.19 
  -1  -9   1   25.99    1.06 
  -1  -9   1   24.53    1.14 
   1   9  -1   26.58    1.10 
  -1   9   1   26.04    0.95 
   1   9  -1   24.56    0.94 
  -1   9   1   24.06    1.12 
   1   9  -1   24.38    1.11 
  -1   9   1   25.14    1.08 
   0  -9  -1  154.16    3.96 
   0  -9  -1  148.49    3.90 
   0  -9   1  153.21    3.71 
   0  -9  -1  150.50    3.83 
   0  -9  -1  151.01    3.74 
   0  -9  -1  149.99    3.74 
   0  -9   1  152.25    3.81 
   0  -9   1  151.75    3.73 
   0  -9   1  148.17    3.91 
   0  -9   1  153.03    3.92 
   0   9   1  151.25    3.51 
   0   9   1  149.89    3.84 
   0   9   1  149.58    3.74 
   0   9  -1  154.34    3.78 
   0   9  -1  146.45    3.84 
   0   9  -1  153.21    3.60 
  -1  -9  -1   21.15    1.05 
  -1  -9  -1   20.18    0.93 
  -1  -9  -1   18.83    1.00 
  -1  -9  -1   20.36    0.94 
   1  -9   1   21.18    1.07 
   1  -9   1   17.21    0.90 
   1  -9   1   19.16    0.88 
  -1  -9  -1   20.28    0.98 
   1  -9   1   18.35    0.89 
   1  -9   1   19.97    1.03 
  -1   9  -1   19.64    0.99 
   1   9   1   20.85    0.94 
   1   9   1   19.26    0.76 
   1   9   1   21.21    1.00 
  -1   9  -1   19.79    0.86 
  -1   9  -1   17.97    0.92 
  -2  -9  -1  116.56    3.18 
   2  -9   1  112.95    3.05 
   2  -9   1  117.78    3.21 
  -2  -9  -1  114.05    3.10 
   2  -9   1  112.82    3.20 
  -2  -9  -1  116.02    3.15 
   2  -9   1  115.68    2.95 
  -2  -9  -1  112.87    3.03 
  -2  -9  -1  115.60    3.02 
   2  -9   1  112.15    2.99 
   2   9   1  111.07    3.05 
  -2   9  -1  118.13    3.18 
  -2   9  -1  117.68    3.22 
   2   9   1  116.49    2.97 
  -2   9  -1  113.50    3.07 
  -2   9  -1  119.63    2.96 
  -3  -9  -1   22.21    1.06 
  -3  -9  -1   22.82    1.06 
  -3  -9  -1   20.94    0.96 
   3  -9   1   20.97    0.99 
  -3  -9  -1   22.22    1.07 
   3  -9   1   23.41    1.01 
   3  -9   1   22.07    0.94 
   3  -9   1   22.57    1.12 
  -3  -9  -1   19.01    0.96 
   3  -9   1   18.97    1.07 
  -3   9  -1   20.47    1.01 
  -3   9  -1   22.84    1.09 
  -3   9  -1   22.25    0.96 
  -3   9  -1   22.15    1.11 
   3   9   1   21.56    1.00 
   3   9   1   21.37    0.94 
  -4  -9  -1   71.10    2.22 
   4  -9   1   71.45    2.12 
  -4  -9  -1   72.41    2.21 
   4  -9   1   74.59    2.33 
  -4  -9  -1   71.36    2.21 
   4  -9   1   74.13    2.17 
   4  -9   1   71.93    2.04 
  -4  -9  -1   71.41    2.17 
  -4  -9  -1   72.51    2.13 
   4  -9   1   72.03    2.34 
  -4   9  -1   70.67    2.11 
  -4   9  -1   74.78    2.32 
  -4   9  -1   70.44    2.22 
  -4   9  -1   71.89    2.28 
   4   9   1   70.52    2.12 
   4   9   1   72.84    2.05 
   5  -9   1   21.59    1.15 
   5  -9   1   22.72    0.95 
  -5  -9  -1   20.34    0.97 
   5  -9   1   23.05    1.03 
  -5  -9  -1   21.81    1.04 
   5  -9   1   23.52    1.17 
  -5  -9  -1   23.14    1.07 
  -5  -9  -1   22.89    1.06 
   5  -9   1   21.53    0.99 
  -5  -9  -1   22.94    1.07 
   5   9   1   24.40    0.97 
  -5   9  -1   23.42    1.04 
  -5   9  -1   22.72    1.14 
  -5   9  -1   19.63    1.09 
  -5   9  -1   22.81    1.11 
  -6  -9  -1   48.22    1.69 
  -6  -9  -1   50.79    1.73 
   6  -9   1   50.20    1.55 
  -6  -9  -1   50.36    1.76 
  -6  -9  -1   50.85    1.67 
   6  -9   1   53.79    1.70 
   6  -9   1   48.55    1.66 
   6  -9   1   47.39    1.84 
   6   9   1   50.75    1.56 
  -6   9  -1   47.71    1.78 
  -6   9  -1   47.37    1.81 
  -6   9  -1   50.43    1.72 
  -6   9  -1   51.58    1.86 
  -7  -9  -1    8.17    0.61 
   7  -9   1    6.19    0.72 
  -7  -9  -1    7.96    0.75 
   7  -9   1    7.93    0.54 
   7  -9   1    7.66    0.60 
  -7  -9  -1    6.74    0.66 
   7  -9   1    8.27    0.61 
  -7  -9  -1    7.00    0.60 
  -7   9  -1    8.55    0.85 
  -7   9  -1    7.06    0.75 
  -7   9  -1    5.92    0.66 
   7   9   1    7.82    0.53 
  -7   9  -1    9.17    0.74 
   8  -9   1   62.00    1.80 
  -8  -9  -1   60.93    2.02 
  -8  -9  -1   60.58    1.93 
   8  -9   1   62.28    2.19 
   8  -9   1   62.89    1.94 
  -8  -9  -1   61.35    1.97 
  -8  -9  -1   60.49    1.94 
   8  -9   1   64.74    1.97 
  -8   9  -1   61.30    2.05 
  -8   9  -1   65.00    2.20 
  -8   9  -1   64.28    2.17 
   8   9   1   60.15    1.79 
  -9  -9  -1    2.24    0.43 
   9  -9   1    1.31    0.31 
   9  -9   1    1.90    0.33 
  -9  -9  -1    2.22    0.40 
  -9  -9  -1    2.70    0.44 
  -9  -9  -1    1.64    0.33 
   9  -9   1    2.10    0.46 
   9  -9   1    2.11    0.39 
  -9   9  -1    2.12    0.47 
   9   9   1    2.04    0.35 
  -9   9  -1    1.15    0.37 
  -9   9  -1    2.16    0.45 
 -10  -9  -1   26.22    1.21 
 -10  -9  -1   26.93    1.15 
 -10  -9  -1   27.06    1.16 
  10  -9   1   25.93    1.12 
  10  -9   1   27.62    1.03 
 -10  -9  -1   25.90    1.11 
  10  -9   1   25.25    1.32 
  10  -9   1   26.53    1.15 
 -10  -9  -1   28.82    1.26 
 -10   9  -1   27.68    1.30 
 -10   9  -1   27.48    1.34 
  10   9   1   27.17    1.03 
 -10   9  -1   27.02    1.34 
  11  -9   1   21.31    0.88 
 -11  -9  -1   23.91    1.13 
  11  -9   1   20.90    0.99 
 -11  -9  -1   19.34    0.94 
 -11  -9  -1   21.29    1.00 
 -11  -9  -1   21.26    1.07 
  11  -9   1   20.01    1.18 
  11  -9   1   20.55    0.99 
 -11  -9  -1   19.93    0.98 
 -11   9  -1   18.95    1.15 
 -11   9  -1   19.03    1.14 
 -11   9  -1   21.62    1.16 
 -12  -9  -1   31.33    1.34 
 -12  -9  -1   28.10    1.21 
  12  -9   1   29.96    1.23 
  12  -9   1   29.63    1.46 
  12  -9   1   31.69    1.23 
 -12  -9  -1   29.09    1.21 
 -12  -9  -1   28.31    1.15 
 -12  -9  -1   29.65    1.31 
 -12   9  -1   30.56    1.48 
 -12   9  -1   29.65    1.43 
 -12   9  -1   28.79    1.41 
 -13  -9  -1    3.98    0.48 
 -13  -9  -1    5.38    0.59 
 -13  -9  -1    5.34    0.65 
 -13  -9  -1    6.03    0.67 
  13  -9   1    4.80    0.57 
 -13   9  -1    4.08    0.64 
 -13   9  -1    4.98    0.71 
 -13   9  -1    6.00    0.78 
 -13   9  -1    4.99    0.71 
  14  -9   1   17.52    0.95 
 -14  -9  -1   19.63    1.07 
 -14  -9  -1   18.60    0.92 
 -14  -9  -1   19.17    0.87 
 -14  -9  -1   18.75    1.03 
 -14   9  -1   18.65    1.16 
 -14   9  -1   17.40    1.13 
 -14   9  -1   20.72    1.22 
 -14   9  -1   17.45    1.10 
 -15  -9  -1   15.45    0.98 
 -15  -9  -1   14.51    0.81 
 -15  -9  -1   14.30    0.73 
  15  -9   1   15.05    0.86 
 -15  -9  -1   15.33    0.95 
 -15   9  -1   13.98    1.05 
 -15   9  -1   13.59    1.02 
 -15   9  -1   17.62    1.10 
 -15   9  -1   15.55    1.09 
 -16  -9  -1   16.06    0.75 
 -16  -9  -1   18.83    1.12 
 -16  -9  -1   16.41    1.00 
  16  -9   1   16.14    0.92 
 -16   9  -1   14.95    1.10 
 -16   9  -1   18.38    1.18 
 -16   9  -1   16.13    1.13 
 -16   9  -1   17.85    1.19 
 -17  -9  -1    0.45    0.33 
 -17  -9  -1    0.43    0.18 
  17  -9   1    0.43    0.25 
 -17   9  -1    0.34    0.33 
 -17   9  -1    0.26    0.36 
 -17   9  -1    0.27    0.34 
 -18  -9  -1    7.70    0.91 
 -18  -9  -1    8.93    0.43 
 -18   9  -1    9.17    1.00 
 -18   9  -1    8.76    0.99 
 -18   9  -1    8.17    1.01 
 -19  -9  -1    3.38    0.67 
 -19   9  -1    2.98    0.69 
 -19   9  -1    5.14    0.81 
 -19   9  -1    3.33    0.64 
 -20  -9  -1    1.60    0.49 
 -20   9  -1    2.23    0.57 
 -20   9  -1    1.49    0.49 
 -20   9  -1    2.29    0.63 
 -21  -9  -1    1.27    0.48 
 -21   9  -1    1.40    0.49 
 -21   9  -1    2.07    0.57 
 -21   9  -1    1.41    0.52 
 -22  -9  -1    5.69    0.87 
 -22   9  -1    7.18    1.05 
 -22   9  -1    7.36    0.94 
 -21 -10   1    0.17    0.38 
 -21  10   1    0.48    0.41 
 -21  10   1    0.51    0.44 
 -20 -10   1    9.81    0.51 
 -20 -10   1    9.20    1.01 
 -20  10   1    7.74    1.00 
 -20  10   1    9.46    1.09 
 -20  10   1   10.26    1.16 
 -19 -10   1    0.00    0.16 
 -19 -10   1    0.09    0.31 
 -19  10   1    0.07    0.33 
 -19  10   1   -0.07    0.30 
 -19  10   1    0.34    0.37 
 -18 -10   1    8.22    0.90 
 -18 -10   1    7.92    0.89 
 -18 -10   1    8.02    0.57 
 -18  10   1    7.49    0.94 
 -18  10   1    8.53    1.03 
 -18  10   1    8.04    0.97 
  17 -10  -1   -0.17    0.21 
 -17 -10   1   -0.09    0.29 
 -17 -10   1   -0.19    0.14 
 -17  10   1    0.33    0.37 
 -17  10   1    0.08    0.29 
 -17  10   1    0.37    0.37 
 -17  10   1    0.18    0.32 
 -16 -10   1   26.66    1.22 
  16 -10  -1   27.62    1.24 
 -16 -10   1   27.37    1.38 
 -16 -10   1   26.73    1.13 
 -16  10   1   25.71    1.46 
 -16  10   1   29.32    1.57 
 -16  10   1   25.10    1.50 
 -16  10   1   25.15    1.46 
 -15 -10   1   -0.08    0.23 
 -15 -10   1    0.21    0.21 
 -15 -10   1    0.04    0.21 
  15 -10  -1    0.08    0.24 
 -15 -10   1    0.28    0.29 
 -15  10   1    0.13    0.31 
 -15  10   1    0.21    0.33 
 -15  10   1    0.26    0.31 
 -15  10   1    0.11    0.30 
 -14 -10   1   28.70    1.34 
 -14 -10   1   27.96    1.37 
 -14 -10   1   27.48    1.25 
 -14 -10   1   27.00    1.18 
  14 -10  -1   25.86    1.21 
 -14  10   1   25.54    1.46 
 -14  10   1   26.71    1.41 
 -14  10   1   27.99    1.48 
 -14  10   1   29.23    1.55 
 -13 -10   1    0.20    0.19 
 -13 -10   1    0.24    0.30 
  13 -10  -1    0.27    0.24 
  13 -10  -1   -0.06    0.29 
 -13 -10   1    0.29    0.27 
 -13 -10   1    0.16    0.21 
 -13  10   1    0.27    0.31 
 -13  10   1    0.24    0.32 
 -13  10   1    0.29    0.33 
 -13  10   1    0.48    0.35 
 -12 -10   1   19.84    1.01 
 -12 -10   1   20.91    1.08 
  12 -10  -1   21.63    1.30 
  12 -10  -1   22.12    1.08 
 -12 -10   1   22.60    1.06 
 -12 -10   1   19.98    1.14 
 -12 -10   1   21.19    1.13 
  12 -10  -1   19.94    1.03 
 -12  10   1   19.00    1.23 
 -12  10   1   20.51    1.25 
 -12  10   1   19.37    1.15 
 -11 -10   1    0.21    0.20 
 -11 -10   1    0.03    0.21 
 -11 -10   1    0.30    0.29 
 -11 -10   1   -0.25    0.18 
  11 -10  -1    0.07    0.22 
 -11 -10   1    0.08    0.20 
  11 -10  -1   -0.14    0.21 
  11  10  -1    0.22    0.21 
 -11  10   1    0.05    0.22 
 -11  10   1    0.05    0.28 
 -11  10   1   -0.35    0.20 
  10 -10  -1   16.44    0.93 
  10 -10  -1   16.44    0.92 
 -10 -10   1   17.55    0.98 
  10 -10  -1   17.69    1.16 
 -10 -10   1   17.00    0.91 
 -10 -10   1   16.56    0.97 
 -10 -10   1   17.13    0.94 
 -10 -10   1   18.45    1.05 
  10 -10  -1   17.37    0.84 
 -10  10   1   17.23    1.13 
  10  10  -1   17.64    0.87 
 -10  10   1   15.76    1.07 
 -10  10   1   15.40    0.98 
  -9 -10   1    0.19    0.27 
  -9 -10   1   -0.05    0.19 
  -9 -10   1   -0.12    0.19 
   9 -10  -1   -0.06    0.20 
   9 -10  -1    0.19    0.22 
   9 -10  -1    0.18    0.29 
  -9 -10   1    0.11    0.19 
   9 -10  -1   -0.01    0.19 
  -9 -10   1   -0.21    0.19 
  -9  10   1   -0.05    0.21 
  -9  10   1   -0.14    0.23 
  -9  10   1    0.25    0.28 
   9  10  -1   -0.10    0.16 
  -8 -10   1    6.72    0.70 
  -8 -10   1    8.44    0.83 
   8 -10  -1    9.04    0.82 
   8 -10  -1    8.81    0.80 
  -8 -10   1    7.77    0.78 
   8 -10  -1    7.00    0.83 
   8 -10  -1    7.03    0.55 
  -8 -10   1    8.24    0.82 
  -8 -10   1    8.95    0.66 
  -8  10   1    8.75    0.69 
   8  10  -1    7.61    0.59 
  -8  10   1    7.63    0.88 
  -8  10   1    7.60    0.86 
   7 -10  -1    0.36    0.25 
  -7 -10   1    1.05    0.33 
  -7 -10   1    0.69    0.29 
   7 -10  -1    0.05    0.26 
  -7 -10   1    1.04    0.33 
  -7 -10   1    0.51    0.29 
   7 -10  -1    0.96    0.36 
   7 -10  -1    1.03    0.30 
  -7 -10   1    0.72    0.32 
   7  10  -1    0.39    0.23 
  -7  10   1    0.39    0.29 
  -7  10   1    0.58    0.32 
  -7  10   1    0.81    0.32 
   6 -10  -1    1.25    0.32 
   6 -10  -1    1.48    0.44 
  -6 -10   1    1.82    0.42 
  -6 -10   1    1.80    0.41 
  -6 -10   1    1.73    0.41 
  -6 -10   1    1.21    0.34 
   6 -10  -1    1.99    0.38 
  -6 -10   1    1.46    0.34 
   6 -10  -1    0.97    0.32 
  -6  10   1    2.07    0.41 
  -6  10   1    1.07    0.37 
   6  10  -1    1.51    0.33 
   5 -10  -1    0.32    0.21 
   5 -10  -1    0.58    0.31 
  -5 -10   1    0.22    0.25 
  -5 -10   1    0.66    0.27 
  -5 -10   1    0.26    0.22 
   5 -10  -1    0.41    0.27 
  -5 -10   1    0.20    0.24 
   5 -10  -1    0.39    0.30 
  -5 -10   1    0.46    0.28 
   5 -10  -1    0.13    0.21 
  -5  10   1    0.63    0.26 
  -5  10   1    0.33    0.25 
   5  10  -1    0.20    0.22 
  -5  10   1    0.28    0.28 
  -4 -10   1   -0.04    0.18 
   4 -10  -1   -0.15    0.18 
   4 -10  -1   -0.09    0.21 
  -4 -10   1   -0.06    0.18 
   4 -10  -1   -0.27    0.20 
  -4 -10   1   -0.29    0.16 
  -4 -10   1    0.10    0.21 
  -4 -10   1   -0.04    0.18 
   4 -10  -1   -0.08    0.16 
   4 -10  -1    0.00    0.19 
  -4  10   1   -0.16    0.17 
  -4  10   1   -0.03    0.21 
   4  10  -1   -0.40    0.16 
  -4  10   1    0.15    0.23 
   4  10  -1   -0.10    0.17 
  -3 -10   1    2.26    0.46 
   3 -10  -1    3.16    0.46 
  -3 -10   1    2.82    0.45 
   3 -10  -1    2.52    0.47 
  -3 -10   1    3.20    0.50 
  -3 -10   1    3.32    0.50 
   3 -10  -1    2.64    0.45 
   3 -10  -1    2.89    0.55 
   3 -10  -1    3.45    0.59 
  -3 -10   1    2.76    0.49 
  -3  10   1    3.44    0.47 
  -3  10   1    2.69    0.47 
   3  10  -1    3.43    0.49 
  -3  10   1    2.17    0.48 
   3  10  -1    2.52    0.46 
   2 -10  -1   10.80    0.70 
  -2 -10   1   12.00    0.75 
   2 -10  -1   12.49    0.87 
   2 -10  -1   10.34    0.83 
  -2 -10   1    8.95    0.75 
   2 -10  -1   10.73    0.72 
   2 -10  -1   11.51    0.78 
  -2 -10   1   11.46    0.72 
  -2 -10   1   12.61    0.81 
  -2 -10   1   11.90    0.84 
   2  10  -1   10.50    0.72 
   2  10  -1   10.54    0.60 
  -2  10   1   11.34    0.66 
  -2  10   1   10.20    0.73 
  -2  10   1   10.59    0.80 
   2  10  -1   11.35    0.79 
  -1 -10   1    1.47    0.39 
   1 -10  -1    1.74    0.43 
  -1 -10   1    1.20    0.33 
   1 -10  -1    1.45    0.42 
   1 -10  -1    1.27    0.34 
  -1 -10   1    1.33    0.34 
   1 -10  -1    1.16    0.38 
  -1 -10   1    1.14    0.36 
   1 -10  -1    0.84    0.32 
  -1 -10   1    0.72    0.29 
   1  10  -1    0.79    0.32 
  -1  10   1    1.29    0.38 
   1  10  -1    1.79    0.34 
  -1  10   1    1.00    0.33 
   1  10  -1    0.66    0.28 
   0 -10  -1   10.91    0.78 
   0 -10   1    9.71    0.67 
   0 -10  -1   11.60    0.74 
   0 -10  -1   11.41    0.84 
   0 -10   1    9.29    0.70 
   0 -10   1   10.55    0.82 
   0 -10   1   11.42    0.83 
   0 -10  -1   11.03    0.83 
   0 -10   1   11.12    0.72 
   0 -10  -1   11.26    0.74 
   0  10   1   12.45    0.83 
   0  10   1   11.50    0.76 
   0  10  -1   11.03    0.64 
   0  10  -1    9.21    0.69 
   0  10  -1   10.32    0.79 
  -1 -10  -1    7.09    0.70 
   1 -10   1    7.75    0.80 
   1 -10   1    6.68    0.67 
  -1 -10  -1    7.48    0.79 
  -1 -10  -1    7.48    0.73 
  -1 -10  -1    6.83    0.77 
   1 -10   1    6.84    0.78 
   1 -10   1    6.02    0.62 
   1 -10   1    7.08    0.72 
  -1 -10  -1    6.94    0.73 
  -1  10  -1    6.91    0.70 
  -1  10  -1    8.74    0.84 
   1  10   1    7.07    0.75 
  -1  10  -1    7.37    0.55 
   1  10   1    8.04    0.63 
  -2 -10  -1    0.99    0.37 
  -2 -10  -1    1.10    0.32 
  -2 -10  -1    1.81    0.42 
   2 -10   1    1.45    0.35 
   2 -10   1    0.82    0.36 
   2 -10   1    1.23    0.33 
   2 -10   1    0.83    0.30 
   2 -10   1    1.22    0.38 
  -2 -10  -1    1.43    0.37 
  -2 -10  -1    1.64    0.41 
   2  10   1    1.31    0.32 
  -2  10  -1    1.56    0.35 
   2  10   1    1.20    0.36 
  -2  10  -1    1.46    0.38 
  -2  10  -1    1.31    0.38 
   3 -10   1    6.03    0.66 
  -3 -10  -1    5.65    0.65 
   3 -10   1    5.90    0.72 
  -3 -10  -1    6.10    0.65 
   3 -10   1    5.20    0.60 
  -3 -10  -1    4.67    0.62 
   3 -10   1    5.74    0.59 
   3 -10   1    5.85    0.74 
  -3 -10  -1    5.79    0.69 
  -3 -10  -1    5.21    0.65 
  -3  10  -1    6.62    0.77 
   3  10   1    5.40    0.61 
  -3  10  -1    6.53    0.65 
   3  10   1    5.34    0.56 
  -3  10  -1    5.48    0.63 
  -4 -10  -1   -0.01    0.21 
   4 -10   1    0.02    0.24 
  -4 -10  -1   -0.10    0.20 
   4 -10   1    0.00    0.24 
   4 -10   1   -0.03    0.19 
  -4 -10  -1    0.30    0.25 
  -4 -10  -1   -0.22    0.16 
   4 -10   1   -0.22    0.19 
  -4 -10  -1    0.06    0.21 
   4 -10   1    0.22    0.23 
  -4  10  -1    0.19    0.22 
   4  10   1    0.25    0.22 
  -4  10  -1   -0.05    0.22 
  -4  10  -1    0.44    0.27 
  -5 -10  -1   -0.06    0.19 
   5 -10   1   -0.01    0.21 
  -5 -10  -1    0.11    0.21 
   5 -10   1   -0.07    0.19 
  -5 -10  -1    0.06    0.24 
  -5 -10  -1    0.24    0.25 
   5 -10   1    0.16    0.24 
   5 -10   1   -0.02    0.21 
   5  10   1    0.10    0.20 
  -5  10  -1    0.04    0.19 
  -5  10  -1    0.12    0.25 
  -5  10  -1    0.38    0.29 
  -6 -10  -1    6.53    0.71 
   6 -10   1    6.67    0.68 
  -6 -10  -1    5.24    0.64 
  -6 -10  -1    5.76    0.67 
  -6 -10  -1    6.61    0.68 
   6 -10   1    4.96    0.69 
   6 -10   1    5.67    0.56 
   6 -10   1    5.55    0.61 
  -6  10  -1    5.77    0.70 
  -6  10  -1    7.37    0.84 
  -6  10  -1    4.81    0.62 
  -6  10  -1    6.50    0.78 
   6  10   1    6.30    0.60 
  -7 -10  -1    3.43    0.51 
   7 -10   1    4.79    0.55 
   7 -10   1    5.17    0.63 
   7 -10   1    4.71    0.68 
  -7 -10  -1    3.69    0.57 
  -7 -10  -1    4.15    0.55 
  -7 -10  -1    4.56    0.59 
   7 -10   1    4.40    0.56 
  -7  10  -1    5.32    0.66 
  -7  10  -1    3.85    0.60 
   7  10   1    4.72    0.52 
  -7  10  -1    3.84    0.62 
   8 -10   1    4.31    0.50 
   8 -10   1    3.58    0.61 
  -8 -10  -1    4.58    0.59 
   8 -10   1    4.62    0.59 
   8 -10   1    4.10    0.56 
  -8 -10  -1    4.28    0.60 
  -8 -10  -1    3.54    0.51 
  -8 -10  -1    3.59    0.52 
  -8  10  -1    3.80    0.57 
  -8  10  -1    3.88    0.62 
  -8  10  -1    4.71    0.69 
   8  10   1    4.26    0.50 
   9 -10   1   -0.03    0.18 
  -9 -10  -1    0.04    0.18 
  -9 -10  -1    0.04    0.18 
   9 -10   1   -0.02    0.19 
  -9 -10  -1   -0.03    0.23 
   9 -10   1   -0.02    0.29 
  -9 -10  -1    0.22    0.21 
   9 -10   1   -0.19    0.17 
  -9  10  -1   -0.12    0.23 
  -9  10  -1   -0.10    0.20 
  -9  10  -1    0.01    0.24 
   9  10   1   -0.04    0.17 
 -10 -10  -1   22.71    1.11 
 -10 -10  -1   22.13    1.17 
  10 -10   1   21.92    1.28 
  10 -10   1   21.42    1.07 
  10 -10   1   22.94    0.98 
 -10 -10  -1   19.52    1.02 
 -10 -10  -1   20.75    1.06 
  10 -10   1   19.62    1.03 
 -10  10  -1   21.39    1.24 
 -10  10  -1   25.29    1.34 
 -10  10  -1   23.12    1.20 
  11 -10   1    1.82    0.49 
 -11 -10  -1    2.15    0.49 
 -11 -10  -1    1.46    0.35 
 -11 -10  -1    1.62    0.39 
 -11 -10  -1    1.81    0.40 
  11 -10   1    2.31    0.45 
  11 -10   1    1.69    0.38 
 -11  10  -1    1.49    0.46 
 -11  10  -1    2.01    0.50 
 -11  10  -1    2.72    0.53 
 -12 -10  -1    8.05    0.79 
 -12 -10  -1    8.29    0.87 
  12 -10   1    8.29    0.98 
  12 -10   1    8.47    0.81 
  12 -10   1    7.68    0.75 
 -12 -10  -1    7.36    0.62 
 -12 -10  -1    7.85    0.66 
 -12  10  -1    8.52    0.92 
 -12  10  -1    9.09    1.00 
 -12  10  -1    8.10    0.94 
  13 -10   1   -0.19    0.17 
 -13 -10  -1    0.12    0.22 
 -13 -10  -1    0.10    0.20 
 -13 -10  -1   -0.06    0.26 
 -13  10  -1    0.07    0.28 
 -13  10  -1    0.01    0.29 
 -13  10  -1    0.14    0.28 
  14 -10   1   10.12    0.74 
 -14 -10  -1   10.06    0.95 
 -14 -10  -1   10.26    0.74 
 -14 -10  -1    9.38    0.66 
 -14  10  -1   11.51    1.15 
 -14  10  -1    9.03    0.99 
 -14  10  -1   10.16    1.05 
 -14  10  -1    9.26    1.01 
  15 -10   1   -0.07    0.21 
 -15 -10  -1   -0.02    0.21 
 -15 -10  -1    0.06    0.19 
 -15  10  -1    0.00    0.28 
 -15  10  -1   -0.05    0.32 
 -15  10  -1    0.04    0.28 
 -15  10  -1    0.10    0.30 
  16 -10   1   13.57    0.88 
 -16 -10  -1   12.95    0.73 
 -16  10  -1   13.28    1.07 
 -16  10  -1   15.13    1.14 
 -16  10  -1   13.33    1.09 
  17 -10   1    0.62    0.32 
 -17 -10  -1    0.36    0.20 
 -17  10  -1    0.25    0.36 
 -17  10  -1    0.25    0.32 
 -17  10  -1    0.39    0.36 
 -18 -10  -1   13.73    0.64 
 -18  10  -1   11.47    1.17 
 -18  10  -1   11.81    1.22 
 -18  10  -1   11.76    1.21 
 -19 -10  -1   -0.03    0.11 
 -19  10  -1   -0.40    0.28 
 -19  10  -1    0.04    0.37 
 -19  10  -1   -0.23    0.33 
 -20  10  -1   21.56    1.47 
 -20  10  -1   21.68    1.46 
 -20  10  -1   20.93    1.41 
 -21  10  -1    0.26    0.39 
 -21  10  -1   -0.14    0.33 
 -20 -11   1    0.07    0.17 
 -20  11   1   -0.03    0.35 
 -20  11   1   -0.12    0.38 
 -19 -11   1   -0.28    0.16 
 -19  11   1   -0.07    0.39 
 -19  11   1    0.47    0.43 
 -18 -11   1    0.66    0.27 
 -18 -11   1    0.47    0.41 
 -18  11   1    1.04    0.45 
 -18  11   1    0.54    0.44 
 -18  11   1    0.95    0.48 
 -17 -11   1    0.10    0.20 
 -17 -11   1    0.13    0.30 
  17 -11  -1   -0.17    0.25 
 -17  11   1    0.08    0.36 
 -17  11   1    0.75    0.44 
 -17  11   1   -0.29    0.33 
 -17  11   1    0.49    0.38 
 -16 -11   1    1.18    0.44 
  16 -11  -1    0.83    0.33 
 -16 -11   1    0.70    0.32 
 -16 -11   1    0.94    0.29 
 -16  11   1    1.05    0.46 
 -16  11   1    1.07    0.51 
 -16  11   1    1.23    0.47 
 -16  11   1    0.86    0.43 
 -15 -11   1   -0.13    0.23 
 -15 -11   1   -0.08    0.18 
 -15 -11   1   -0.33    0.19 
  15 -11  -1   -0.22    0.17 
 -15 -11   1   -0.01    0.24 
 -15  11   1    0.07    0.28 
 -15  11   1    0.11    0.33 
 -15  11   1   -0.05    0.26 
 -15  11   1    0.16    0.34 
 -14 -11   1    1.07    0.32 
 -14 -11   1    0.48    0.34 
 -14 -11   1    0.91    0.38 
  14 -11  -1    1.15    0.37 
 -14 -11   1    1.76    0.42 
 -14  11   1    1.19    0.47 
 -14  11   1    1.59    0.46 
 -14  11   1    0.70    0.41 
 -14  11   1    1.35    0.47 
 -13 -11   1    2.55    0.52 
  13 -11  -1    3.23    0.55 
 -13 -11   1    2.42    0.47 
 -13 -11   1    2.64    0.48 
 -13  11   1    2.17    0.50 
 -13  11   1    2.20    0.58 
 -13  11   1    1.82    0.54 
 -12 -11   1   16.58    1.05 
 -12 -11   1   14.47    0.92 
 -12 -11   1   16.66    1.00 
  12 -11  -1   15.83    0.96 
  12 -11  -1   14.26    1.12 
  12 -11  -1   13.65    0.89 
 -12 -11   1   16.00    0.96 
 -12  11   1   13.83    1.09 
 -12  11   1   15.84    1.06 
 -12  11   1   16.15    1.16 
 -11 -11   1    2.16    0.45 
  11 -11  -1    1.56    0.39 
 -11 -11   1    2.17    0.46 
  11 -11  -1    2.01    0.55 
 -11 -11   1    1.64    0.45 
  11 -11  -1    1.79    0.44 
 -11 -11   1    1.25    0.36 
 -11  11   1    2.37    0.53 
 -11  11   1    2.63    0.57 
 -11  11   1    2.00    0.52 
 -10 -11   1    7.05    0.76 
  10 -11  -1    6.89    0.67 
 -10 -11   1    6.55    0.78 
 -10 -11   1    6.57    0.71 
  10 -11  -1    6.24    0.71 
  10 -11  -1    8.59    1.05 
  10 -11  -1    7.53    0.81 
 -10 -11   1    7.27    0.81 
 -10  11   1    8.67    0.87 
 -10  11   1    4.96    0.75 
  10  11  -1    5.70    0.63 
  -9 -11   1    0.33    0.24 
  -9 -11   1   -0.16    0.21 
   9 -11  -1   -0.13    0.24 
   9 -11  -1    0.27    0.23 
   9 -11  -1    0.29    0.27 
   9 -11  -1   -0.33    0.19 
  -9 -11   1   -0.33    0.16 
  -9 -11   1   -0.15    0.18 
   9  11  -1   -0.25    0.18 
  -9  11   1    0.04    0.22 
  -9  11   1   -0.10    0.24 
   8 -11  -1    6.46    0.75 
   8 -11  -1    5.51    0.62 
  -8 -11   1    5.66    0.68 
  -8 -11   1    5.84    0.72 
  -8 -11   1    5.46    0.69 
  -8 -11   1    5.31    0.65 
   8 -11  -1    5.23    0.64 
   8 -11  -1    5.55    0.80 
  -8  11   1    5.49    0.68 
   8  11  -1    5.00    0.59 
  -8  11   1    5.96    0.81 
  -7 -11   1    6.31    0.76 
   7 -11  -1    5.18    0.64 
   7 -11  -1    5.28    0.79 
   7 -11  -1    5.43    0.69 
  -7 -11   1    5.07    0.67 
  -7 -11   1    5.32    0.66 
  -7 -11   1    5.88    0.71 
   7 -11  -1    6.44    0.66 
  -7 -11   1    5.11    0.62 
   7  11  -1    5.48    0.63 
  -7  11   1    4.63    0.61 
  -7  11   1    6.12    0.79 
  -6 -11   1    8.31    0.82 
  -6 -11   1    7.55    0.77 
  -6 -11   1    7.94    0.76 
  -6 -11   1    7.54    0.83 
   6 -11  -1    6.48    0.87 
   6 -11  -1    7.28    0.75 
   6 -11  -1    7.30    0.70 
   6 -11  -1    7.94    0.81 
  -6 -11   1    6.55    0.75 
  -6  11   1    8.13    0.78 
  -6  11   1    6.32    0.82 
   6  11  -1    8.33    0.75 
   5 -11  -1    5.66    0.70 
  -5 -11   1    7.52    0.74 
  -5 -11   1    6.54    0.75 
  -5 -11   1    7.29    0.77 
   5 -11  -1    7.36    0.72 
   5 -11  -1    6.33    0.69 
  -5 -11   1    7.79    0.83 
  -5 -11   1    7.22    0.79 
   5 -11  -1    7.75    0.89 
   5  11  -1    8.31    0.77 
  -5  11   1    8.46    0.91 
  -5  11   1    7.49    0.72 
  -4 -11   1    4.99    0.65 
  -4 -11   1    5.23    0.68 
  -4 -11   1    6.51    0.78 
   4 -11  -1    5.52    0.75 
  -4 -11   1    6.14    0.68 
  -4 -11   1    5.29    0.63 
   4 -11  -1    4.50    0.69 
   4 -11  -1    4.64    0.58 
   4 -11  -1    5.57    0.69 
   4 -11  -1    5.34    0.63 
   4  11  -1    4.47    0.56 
  -4  11   1    4.89    0.69 
  -4  11   1    5.97    0.73 
  -3 -11   1    7.05    0.77 
  -3 -11   1    7.53    0.85 
   3 -11  -1    6.21    0.79 
   3 -11  -1    7.15    0.74 
  -3 -11   1    7.95    0.78 
   3 -11  -1    7.23    0.87 
  -3 -11   1    6.87    0.76 
   3 -11  -1    7.70    0.83 
   3 -11  -1    7.33    0.73 
  -3 -11   1    6.72    0.70 
  -3  11   1    6.49    0.77 
  -3  11   1    8.56    0.84 
   3  11  -1    7.86    0.78 
   3  11  -1    7.20    0.77 
  -2 -11   1    2.74    0.52 
   2 -11  -1    2.69    0.50 
   2 -11  -1    2.95    0.55 
   2 -11  -1    2.63    0.45 
  -2 -11   1    2.78    0.46 
  -2 -11   1    3.12    0.49 
   2 -11  -1    2.62    0.56 
   2 -11  -1    2.28    0.45 
  -2 -11   1    1.94    0.45 
  -2 -11   1    2.75    0.49 
   2  11  -1    2.38    0.43 
   2  11  -1    2.99    0.53 
  -2  11   1    2.96    0.53 
  -2  11   1    2.96    0.50 
   1 -11  -1   19.36    1.03 
   1 -11  -1   17.41    1.04 
  -1 -11   1   19.57    1.13 
  -1 -11   1   18.73    1.00 
  -1 -11   1   19.59    1.08 
   1 -11  -1   18.74    1.15 
   1 -11  -1   19.10    1.13 
  -1 -11   1   17.76    1.10 
  -1 -11   1   21.50    1.05 
   1 -11  -1   19.75    1.04 
  -1  11   1   18.58    1.09 
  -1  11   1   20.15    1.06 
   1  11  -1   18.33    1.02 
   1  11  -1   21.12    1.13 
   0 -11  -1   29.56    1.39 
   0 -11   1   32.58    1.49 
   0 -11   1   27.42    1.33 
   0 -11  -1   33.92    1.54 
   0 -11  -1   30.06    1.32 
   0 -11   1   31.25    1.50 
   0 -11   1   28.51    1.28 
   0 -11  -1   28.91    1.43 
   0 -11  -1   30.91    1.34 
   0 -11   1   32.09    1.33 
   0  11   1   32.10    1.44 
   0  11  -1   31.85    1.37 
   0  11   1   32.99    1.37 
   0  11  -1   32.63    1.45 
  -1 -11  -1   30.04    1.31 
  -1 -11  -1   29.59    1.37 
   1 -11   1   30.14    1.47 
   1 -11   1   28.35    1.24 
  -1 -11  -1   27.19    1.36 
  -1 -11  -1   29.60    1.30 
   1 -11   1   32.27    1.48 
  -1 -11  -1   31.18    1.47 
   1 -11   1   27.78    1.32 
   1 -11   1   27.71    1.25 
   1  11   1   28.32    1.34 
   1  11   1   29.87    1.29 
  -1  11  -1   30.11    1.41 
  -1  11  -1   27.32    1.28 
  -1  11  -1   29.82    1.30 
   2 -11   1   33.34    1.35 
  -2 -11  -1   29.67    1.46 
  -2 -11  -1   32.46    1.37 
   2 -11   1   31.58    1.35 
  -2 -11  -1   32.01    1.48 
   2 -11   1   31.35    1.42 
  -2 -11  -1   32.52    1.39 
   2 -11   1   35.97    1.61 
  -2 -11  -1   35.31    1.50 
   2 -11   1   33.27    1.55 
  -2  11  -1   32.46    1.28 
   2  11   1   32.17    1.42 
  -2  11  -1   31.91    1.48 
   2  11   1   33.44    1.36 
  -2  11  -1   31.04    1.40 
   3 -11   1   24.37    1.11 
  -3 -11  -1   24.51    1.25 
  -3 -11  -1   24.31    1.25 
  -3 -11  -1   23.90    1.18 
   3 -11   1   22.96    1.17 
   3 -11   1   22.72    1.29 
  -3 -11  -1   22.55    1.24 
  -3 -11  -1   23.24    1.14 
   3 -11   1   26.99    1.20 
   3  11   1   21.89    1.09 
  -3  11  -1   22.71    1.18 
  -3  11  -1   26.37    1.31 
  -3  11  -1   24.56    1.11 
   4 -11   1   16.08    1.09 
  -4 -11  -1   13.80    0.95 
  -4 -11  -1   15.57    0.98 
  -4 -11  -1   14.89    0.91 
   4 -11   1   13.89    0.82 
   4 -11   1   14.24    0.89 
  -4 -11  -1   15.58    0.99 
   4 -11   1   14.48    0.91 
  -4  11  -1   15.01    0.87 
   4  11   1   17.05    0.91 
  -4  11  -1   16.38    1.00 
  -4  11  -1   13.97    0.98 
   5 -11   1    8.31    0.79 
  -5 -11  -1    7.97    0.82 
  -5 -11  -1    9.14    0.70 
  -5 -11  -1    8.97    0.76 
   5 -11   1    7.77    0.72 
   5 -11   1    7.44    0.87 
   5 -11   1    7.67    0.78 
  -5 -11  -1    7.89    0.84 
  -5  11  -1    8.75    0.88 
   5  11   1    7.98    0.63 
  -5  11  -1    7.88    0.79 
  -5  11  -1    8.83    0.93 
  -6 -11  -1   17.39    1.04 
   6 -11   1   15.63    0.94 
  -6 -11  -1   16.41    1.01 
  -6 -11  -1   16.87    1.04 
   6 -11   1   18.05    1.01 
  -6 -11  -1   19.82    1.03 
   6 -11   1   15.85    0.88 
   6 -11   1   16.07    1.12 
   6  11   1   19.28    0.95 
  -6  11  -1   17.66    1.12 
  -6  11  -1   16.41    0.96 
  -6  11  -1   16.88    1.06 
   7 -11   1   12.14    0.76 
  -7 -11  -1   13.32    0.86 
  -7 -11  -1   14.31    0.94 
  -7 -11  -1   10.89    0.86 
   7 -11   1   12.25    0.85 
   7 -11   1   12.90    0.99 
  -7 -11  -1   11.69    0.85 
   7 -11   1   13.24    0.85 
   7  11   1   12.35    0.76 
  -7  11  -1   11.80    0.82 
  -7  11  -1   13.50    0.99 
   8 -11   1   14.97    0.94 
   8 -11   1   15.24    0.84 
  -8 -11  -1   15.12    0.95 
  -8 -11  -1   15.84    0.96 
  -8 -11  -1   15.87    1.02 
   8 -11   1   15.10    1.10 
   8 -11   1   16.71    0.96 
  -8 -11  -1   15.05    0.97 
  -8  11  -1   15.19    1.07 
  -8  11  -1   16.05    0.99 
  -9 -11  -1    0.56    0.29 
   9 -11   1    0.34    0.28 
   9 -11   1    0.16    0.26 
   9 -11   1    0.17    0.23 
  -9 -11  -1    0.07    0.20 
  -9 -11  -1    0.22    0.25 
  -9 -11  -1    0.05    0.26 
   9 -11   1    0.59    0.36 
  -9  11  -1    0.47    0.40 
  -9  11  -1    0.25    0.29 
  -9  11  -1    0.35    0.25 
  10 -11   1    3.59    0.68 
 -10 -11  -1    3.82    0.58 
 -10 -11  -1    3.10    0.55 
  10 -11   1    3.00    0.52 
  10 -11   1    3.99    0.57 
 -10 -11  -1    4.33    0.63 
 -10 -11  -1    3.76    0.57 
  10 -11   1    3.38    0.49 
 -10  11  -1    3.01    0.61 
 -10  11  -1    2.87    0.55 
 -10  11  -1    3.14    0.64 
  11 -11   1    3.15    0.64 
  11 -11   1    2.67    0.50 
 -11 -11  -1    2.55    0.50 
 -11 -11  -1    2.11    0.43 
  11 -11   1    2.42    0.50 
 -11 -11  -1    2.89    0.51 
 -11 -11  -1    2.32    0.53 
 -11  11  -1    2.87    0.59 
 -11  11  -1    2.48    0.58 
 -11  11  -1    1.57    0.50 
 -12 -11  -1    8.62    0.93 
 -12 -11  -1    9.73    0.77 
  12 -11   1    9.95    0.77 
 -12 -11  -1    9.36    0.76 
 -12 -11  -1    8.75    0.72 
  12 -11   1    9.89    0.76 
 -12  11  -1    8.78    1.01 
 -12  11  -1   10.15    1.06 
 -12  11  -1   10.43    1.13 
  13 -11   1    4.09    0.61 
 -13 -11  -1    4.06    0.55 
 -13 -11  -1    4.48    0.67 
 -13 -11  -1    4.73    0.64 
 -13  11  -1    4.54    0.75 
 -13  11  -1    3.80    0.67 
 -13  11  -1    6.10    0.89 
 -14 -11  -1    7.01    0.83 
 -14 -11  -1    6.95    0.76 
  14 -11   1    6.00    0.72 
 -14 -11  -1    5.34    0.62 
 -14  11  -1    5.38    0.82 
 -14  11  -1    5.83    0.85 
 -14  11  -1    6.30    0.86 
 -14  11  -1    5.77    0.83 
 -15 -11  -1    2.15    0.46 
 -15 -11  -1    2.19    0.41 
  15 -11   1    1.87    0.44 
 -15  11  -1    1.61    0.52 
 -15  11  -1    2.17    0.62 
 -15  11  -1    3.24    0.68 
 -15  11  -1    1.74    0.52 
  16 -11   1    1.05    0.38 
 -16 -11  -1    1.44    0.34 
 -16  11  -1    1.31    0.49 
 -16  11  -1    0.93    0.46 
 -16  11  -1    1.92    0.57 
  17 -11   1    2.28    0.51 
 -17 -11  -1    1.66    0.35 
 -17  11  -1    2.43    0.66 
 -17  11  -1    1.07    0.46 
 -17  11  -1    1.83    0.56 
 -18 -11  -1    6.34    0.50 
 -18  11  -1    6.43    0.94 
 -18  11  -1    6.39    0.94 
 -18  11  -1    7.89    1.04 
 -19 -11  -1    0.80    0.21 
 -19  11  -1    0.97    0.48 
 -19  11  -1    0.74    0.45 
 -18 -12   1    2.12    0.42 
 -18  12   1    1.66    0.59 
 -18  12   1    1.48    0.57 
  17 -12  -1    0.45    0.37 
 -17 -12   1   -0.06    0.21 
 -17  12   1    0.29    0.39 
 -17  12   1    0.75    0.49 
 -16 -12   1    2.15    0.46 
 -16 -12   1    3.10    0.56 
  16 -12  -1    2.19    0.53 
 -16  12   1    2.30    0.62 
 -16  12   1    2.02    0.57 
 -16  12   1    2.67    0.64 
 -16  12   1    2.34    0.67 
 -15 -12   1    6.65    0.85 
 -15 -12   1    4.99    0.72 
  15 -12  -1    4.63    0.69 
 -15 -12   1    5.11    0.65 
 -15  12   1    6.22    0.92 
 -15  12   1    4.78    0.83 
 -15  12   1    4.15    0.74 
 -15  12   1    5.47    0.92 
 -14 -12   1    0.09    0.28 
 -14 -12   1    0.30    0.26 
  14 -12  -1    0.62    0.35 
 -14 -12   1    0.26    0.28 
 -14  12   1    0.47    0.39 
 -14  12   1    1.36    0.49 
 -14  12   1    0.54    0.40 
 -13 -12   1   16.78    1.03 
 -13 -12   1   17.32    1.10 
 -13 -12   1   18.42    1.17 
  13 -12  -1   17.51    1.07 
 -13  12   1   17.20    1.16 
 -13  12   1   15.39    1.20 
 -12 -12   1   -0.14    0.21 
 -12 -12   1   -0.15    0.21 
  12 -12  -1   -0.36    0.26 
  12 -12  -1   -0.13    0.24 
 -12 -12   1    0.05    0.30 
  12 -12  -1   -0.01    0.27 
 -12  12   1    0.11    0.31 
 -12  12   1    0.24    0.32 
 -11 -12   1    9.89    1.00 
  11 -12  -1    9.90    0.96 
  11 -12  -1    8.36    0.90 
 -11 -12   1   10.20    0.83 
 -11 -12   1    9.85    0.77 
  11 -12  -1    8.21    1.05 
 -11 -12   1   11.24    0.89 
 -11  12   1   10.17    1.14 
 -11  12   1   11.25    1.06 
 -10 -12   1    0.14    0.30 
 -10 -12   1   -0.30    0.19 
  10 -12  -1    0.40    0.30 
  10 -12  -1    0.14    0.33 
  10 -12  -1    0.21    0.27 
 -10 -12   1    0.02    0.23 
 -10 -12   1    0.07    0.24 
 -10  12   1    0.06    0.28 
 -10  12   1   -0.08    0.28 
   9 -12  -1    3.25    0.60 
   9 -12  -1    4.68    0.61 
  -9 -12   1    3.48    0.58 
  -9 -12   1    3.34    0.62 
  -9 -12   1    3.71    0.61 
   9 -12  -1    3.00    0.66 
   9 -12  -1    3.86    0.60 
  -9 -12   1    3.38    0.57 
  -9  12   1    4.37    0.73 
  -9  12   1    3.01    0.55 
  -8 -12   1   -0.27    0.20 
  -8 -12   1    0.17    0.25 
   8 -12  -1    0.03    0.21 
   8 -12  -1   -0.28    0.23 
   8 -12  -1   -0.11    0.19 
   8 -12  -1   -0.22    0.25 
  -8 -12   1    0.49    0.27 
  -8 -12   1   -0.23    0.24 
  -8  12   1    0.30    0.31 
   8  12  -1   -0.08    0.19 
  -7 -12   1    6.00    0.78 
   7 -12  -1    5.45    0.71 
   7 -12  -1    6.02    0.86 
   7 -12  -1    3.71    0.57 
   7 -12  -1    6.53    0.70 
  -7 -12   1    4.86    0.73 
  -7 -12   1    4.83    0.64 
  -7 -12   1    6.21    0.78 
  -7  12   1    5.45    0.80 
   7  12  -1    5.09    0.64 
  -6 -12   1    0.68    0.34 
  -6 -12   1   -0.07    0.18 
   6 -12  -1   -0.11    0.26 
  -6 -12   1    0.21    0.27 
   6 -12  -1   -0.11    0.18 
   6 -12  -1    0.08    0.28 
  -6 -12   1    0.07    0.23 
  -6 -12   1   -0.08    0.23 
   6 -12  -1    0.09    0.23 
   6  12  -1    0.12    0.25 
  -6  12   1    0.05    0.26 
  -5 -12   1   -0.01    0.23 
   5 -12  -1   -0.11    0.19 
   5 -12  -1   -0.05    0.23 
   5 -12  -1    0.11    0.23 
  -5 -12   1   -0.30    0.19 
  -5 -12   1   -0.18    0.18 
  -5 -12   1   -0.01    0.23 
  -5 -12   1   -0.34    0.17 
   5 -12  -1   -0.16    0.23 
   5  12  -1    0.24    0.23 
  -5  12   1    0.08    0.24 
  -4 -12   1    1.20    0.42 
   4 -12  -1    1.89    0.43 
   4 -12  -1    1.31    0.44 
  -4 -12   1    1.78    0.48 
  -4 -12   1    1.96    0.44 
  -4 -12   1    2.30    0.49 
  -4 -12   1    1.76    0.46 
   4 -12  -1    1.48    0.44 
   4 -12  -1    1.50    0.40 
   4  12  -1    0.99    0.32 
  -4  12   1    0.88    0.34 
  -4  12   1    1.93    0.47 
  -3 -12   1    0.24    0.27 
  -3 -12   1    0.80    0.33 
   3 -12  -1    0.46    0.27 
   3 -12  -1    0.09    0.22 
   3 -12  -1    0.21    0.28 
  -3 -12   1    0.01    0.28 
  -3 -12   1    0.68    0.28 
   3 -12  -1    0.91    0.39 
  -3 -12   1    0.76    0.34 
  -3  12   1    0.90    0.41 
   3  12  -1    0.27    0.23 
  -3  12   1    0.20    0.30 
   2 -12  -1    2.79    0.52 
  -2 -12   1    2.88    0.51 
   2 -12  -1    2.66    0.56 
  -2 -12   1    2.61    0.53 
   2 -12  -1    2.01    0.44 
   2 -12  -1    2.56    0.57 
   2 -12  -1    2.52    0.56 
  -2 -12   1    2.16    0.48 
  -2 -12   1    3.22    0.59 
  -2 -12   1    2.91    0.59 
   2  12  -1    3.21    0.53 
  -2  12   1    2.43    0.54 
  -2  12   1    2.14    0.46 
   1 -12  -1    8.14    0.97 
  -1 -12   1    8.70    0.85 
   1 -12  -1    9.46    0.90 
  -1 -12   1    8.68    0.95 
  -1 -12   1    8.53    0.88 
  -1 -12   1   10.73    0.80 
  -1 -12   1    9.50    0.97 
   1 -12  -1    7.03    0.83 
   1 -12  -1    7.57    0.90 
   1 -12  -1    9.67    0.75 
  -1  12   1    8.68    0.87 
  -1  12   1    8.04    0.86 
   1  12  -1    8.42    0.86 
   1  12  -1    9.85    0.96 
   0 -12  -1   -0.09    0.21 
   0 -12  -1    0.17    0.28 
   0 -12   1   -0.12    0.19 
   0 -12   1   -0.30    0.22 
   0 -12   1    0.14    0.28 
   0 -12   1    0.01    0.26 
   0 -12  -1    0.00    0.25 
   0 -12  -1    0.34    0.25 
   0 -12   1   -0.07    0.20 
   0 -12  -1   -0.25    0.21 
   0  12   1    0.27    0.22 
   0  12   1   -0.04    0.23 
   0  12  -1    0.42    0.25 
   0  12  -1   -0.24    0.19 
  -1 -12  -1    2.64    0.54 
   1 -12   1    3.02    0.62 
  -1 -12  -1    2.13    0.49 
   1 -12   1    2.15    0.52 
   1 -12   1    2.53    0.48 
   1 -12   1    1.80    0.45 
  -1 -12  -1    1.85    0.43 
   1 -12   1    1.74    0.44 
  -1 -12  -1    1.89    0.45 
  -1 -12  -1    2.55    0.54 
  -1  12  -1    1.77    0.44 
  -1  12  -1    1.57    0.44 
   1  12   1    1.83    0.42 
   2 -12   1    0.12    0.23 
  -2 -12  -1   -0.15    0.21 
   2 -12   1   -0.21    0.20 
   2 -12   1   -0.07    0.24 
  -2 -12  -1   -0.07    0.25 
  -2 -12  -1    0.37    0.26 
   2 -12   1   -0.02    0.21 
  -2 -12  -1   -0.21    0.18 
  -2 -12  -1   -0.26    0.17 
  -2  12  -1   -0.17    0.23 
  -2  12  -1   -0.23    0.18 
   2  12   1   -0.05    0.20 
  -3 -12  -1    1.17    0.40 
   3 -12   1    1.11    0.35 
  -3 -12  -1    0.97    0.36 
   3 -12   1    1.74    0.47 
   3 -12   1    1.72    0.46 
  -3 -12  -1    1.30    0.42 
  -3 -12  -1    1.74    0.41 
   3 -12   1    1.72    0.39 
  -3  12  -1    2.27    0.50 
  -3  12  -1    2.06    0.49 
   3  12   1    1.49    0.40 
   4 -12   1    0.60    0.34 
  -4 -12  -1    0.72    0.30 
  -4 -12  -1    0.38    0.29 
  -4 -12  -1    0.49    0.30 
  -4 -12  -1    0.18    0.26 
   4 -12   1    0.27    0.28 
   4 -12   1   -0.07    0.19 
  -4  12  -1    0.16    0.25 
   4  12   1    0.22    0.24 
  -4  12  -1    0.00    0.25 
  -5 -12  -1    1.30    0.42 
  -5 -12  -1    2.22    0.49 
   5 -12   1    1.80    0.43 
   5 -12   1    1.36    0.36 
  -5 -12  -1    2.02    0.49 
   5 -12   1    1.42    0.47 
  -5 -12  -1    1.63    0.43 
   5 -12   1    1.55    0.43 
  -5  12  -1    1.84    0.43 
  -5  12  -1    2.11    0.52 
   5  12   1    1.40    0.37 
  -5  12  -1    1.65    0.44 
  -6 -12  -1    0.31    0.27 
   6 -12   1    0.36    0.33 
   6 -12   1    0.01    0.24 
   6 -12   1    0.04    0.22 
  -6 -12  -1    0.30    0.30 
  -6 -12  -1   -0.03    0.23 
   6 -12   1   -0.36    0.14 
  -6 -12  -1   -0.07    0.22 
   6  12   1    0.08    0.23 
  -6  12  -1    0.05    0.29 
  -6  12  -1    0.04    0.25 
  -7 -12  -1    1.44    0.44 
  -7 -12  -1    1.70    0.45 
   7 -12   1    1.61    0.42 
  -7 -12  -1    1.81    0.48 
   7 -12   1    1.88    0.54 
  -7 -12  -1    2.13    0.46 
   7 -12   1    1.30    0.35 
   7 -12   1    1.53    0.41 
  -7  12  -1    1.65    0.48 
  -7  12  -1    1.84    0.44 
   8 -12   1   -0.23    0.24 
   8 -12   1    0.55    0.31 
  -8 -12  -1   -0.01    0.25 
  -8 -12  -1   -0.33    0.19 
   8 -12   1    0.00    0.21 
   8 -12   1    0.23    0.22 
  -8 -12  -1    0.03    0.21 
  -8 -12  -1    0.01    0.25 
  -8  12  -1   -0.06    0.24 
  -8  12  -1   -0.06    0.24 
  -9 -12  -1    1.03    0.36 
  -9 -12  -1    1.05    0.40 
   9 -12   1    1.03    0.44 
   9 -12   1    0.69    0.34 
   9 -12   1    0.98    0.35 
   9 -12   1    0.90    0.32 
  -9 -12  -1    0.73    0.35 
  -9 -12  -1    0.60    0.34 
  -9  12  -1    1.28    0.42 
  -9  12  -1    1.05    0.43 
  10 -12   1    0.39    0.31 
 -10 -12  -1    0.07    0.32 
 -10 -12  -1    0.12    0.26 
  10 -12   1    0.14    0.27 
 -10 -12  -1    0.13    0.24 
 -10 -12  -1   -0.03    0.23 
  10 -12   1    0.51    0.38 
 -10  12  -1   -0.19    0.22 
 -10  12  -1    0.14    0.29 
  11 -12   1   -0.05    0.33 
 -11 -12  -1    0.27    0.29 
  11 -12   1    0.50    0.33 
 -11 -12  -1   -0.02    0.25 
  11 -12   1    0.36    0.32 
 -11 -12  -1    0.15    0.26 
 -11 -12  -1   -0.07    0.29 
 -11  12  -1    0.08    0.32 
 -11  12  -1    0.39    0.31 
  12 -12   1    0.31    0.28 
 -12 -12  -1    0.33    0.32 
 -12 -12  -1   -0.06    0.24 
 -12 -12  -1   -0.04    0.22 
 -12  12  -1    0.92    0.36 
 -12  12  -1   -0.24    0.26 
 -13 -12  -1    0.58    0.30 
 -13 -12  -1    0.49    0.36 
 -13 -12  -1    1.23    0.42 
  13 -12   1    0.18    0.29 
 -13  12  -1    0.68    0.47 
 -13  12  -1    0.48    0.39 
 -13  12  -1    1.22    0.45 
  14 -12   1   -0.11    0.23 
 -14 -12  -1    0.12    0.25 
 -14 -12  -1    0.48    0.33 
 -14 -12  -1   -0.18    0.28 
 -14  12  -1    0.25    0.34 
 -14  12  -1    0.55    0.40 
 -14  12  -1    0.25    0.38 
 -14  12  -1    0.61    0.44 
 -15 -12  -1    3.99    0.64 
  15 -12   1    3.25    0.57 
 -15 -12  -1    3.61    0.53 
 -15  12  -1    4.33    0.79 
 -15  12  -1    3.01    0.68 
 -15  12  -1    3.92    0.75 
 -15  12  -1    3.65    0.76 
  16 -12   1    0.05    0.26 
 -16 -12  -1    0.25    0.25 
 -16  12  -1   -0.40    0.27 
 -16  12  -1    0.04    0.38 
 -16  12  -1   -0.47    0.30 
  17 -12   1    1.64    0.49 
 -17 -12  -1    1.60    0.37 
 -17  12  -1    2.26    0.63 
 -17  12  -1    1.54    0.54 
  16 -13  -1    9.14    0.98 
 -16 -13   1    8.48    0.97 
 -16  13   1    7.06    1.06 
 -16  13   1    6.48    0.96 
 -15 -13   1    0.51    0.38 
  15 -13  -1   -0.04    0.32 
 -15 -13   1    0.88    0.40 
 -15 -13   1    0.47    0.38 
 -15  13   1    0.74    0.45 
 -15  13   1    0.85    0.52 
 -14 -13   1   13.01    1.03 
  14 -13  -1   12.93    0.99 
 -14 -13   1   14.02    1.32 
 -14 -13   1   14.46    1.02 
 -14  13   1   16.15    1.31 
 -14  13   1   13.64    1.40 
 -14  13   1   13.60    1.08 
 -13 -13   1    1.47    0.51 
  13 -13  -1    1.03    0.43 
 -13 -13   1    1.82    0.51 
 -13  13   1    1.18    0.53 
 -12 -13   1    4.27    0.67 
  12 -13  -1    4.49    0.95 
  12 -13  -1    4.77    0.77 
 -12 -13   1    4.44    0.72 
  12 -13  -1    4.78    0.70 
 -12 -13   1    5.29    0.83 
 -12  13   1    4.25    0.80 
  11 -13  -1    0.77    0.40 
 -11 -13   1    2.01    0.55 
 -11 -13   1    1.04    0.42 
 -11 -13   1    1.41    0.45 
  11 -13  -1    0.85    0.45 
  11 -13  -1    0.68    0.35 
 -11 -13   1    1.50    0.46 
 -11  13   1    1.05    0.51 
  10 -13  -1   14.97    1.03 
  10 -13  -1   14.79    1.08 
 -10 -13   1   13.46    1.02 
 -10 -13   1   14.07    1.00 
  10 -13  -1   14.63    1.45 
 -10 -13   1   15.24    1.10 
 -10 -13   1   13.81    1.06 
 -10  13   1   16.49    1.26 
   9 -13  -1    1.08    0.41 
  -9 -13   1    0.71    0.38 
   9 -13  -1    0.55    0.32 
  -9 -13   1    0.82    0.40 
   9 -13  -1    1.52    0.53 
  -9 -13   1    0.92    0.39 
   9 -13  -1    0.37    0.37 
  -9 -13   1    0.79    0.38 
  -9  13   1    1.19    0.48 
  -8 -13   1   21.77    1.23 
   8 -13  -1   23.98    1.53 
   8 -13  -1   22.02    1.16 
  -8 -13   1   21.62    1.29 
  -8 -13   1   23.96    1.38 
   8 -13  -1   24.07    1.34 
  -8 -13   1   22.07    1.34 
   8 -13  -1   21.70    1.24 
  -8  13   1   22.76    1.43 
  -7 -13   1   -0.09    0.25 
   7 -13  -1    0.30    0.33 
   7 -13  -1    0.03    0.33 
  -7 -13   1    0.55    0.34 
  -7 -13   1    0.07    0.29 
  -7 -13   1    0.09    0.24 
   7 -13  -1   -0.26    0.22 
   7 -13  -1    0.24    0.27 
  -7  13   1    0.04    0.32 
   7  13  -1   -0.07    0.25 
  -6 -13   1   15.48    1.13 
   6 -13  -1   13.65    0.93 
  -6 -13   1   14.99    1.08 
  -6 -13   1   14.66    1.00 
   6 -13  -1   15.70    1.23 
  -6 -13   1   15.91    1.11 
   6 -13  -1   14.83    1.01 
   6 -13  -1   15.03    1.06 
  -6  13   1   13.90    1.12 
   6  13  -1   15.55    0.98 
   5 -13  -1    0.06    0.24 
  -5 -13   1    0.46    0.37 
  -5 -13   1    0.84    0.42 
  -5 -13   1    0.38    0.34 
   5 -13  -1    0.44    0.30 
  -5 -13   1    0.70    0.37 
   5 -13  -1    0.33    0.33 
  -5 -13   1    0.14    0.25 
   5 -13  -1    0.10    0.34 
  -5  13   1    0.49    0.32 
   5  13  -1    0.27    0.30 
  -4 -13   1   10.94    1.14 
   4 -13  -1    9.10    0.94 
   4 -13  -1   10.57    0.99 
  -4 -13   1   10.75    1.10 
  -4 -13   1   11.58    1.11 
   4 -13  -1    9.07    0.99 
   4 -13  -1   10.56    1.15 
  -4 -13   1    9.67    0.99 
  -4 -13   1   11.40    0.86 
  -4  13   1   11.93    1.01 
   4  13  -1   11.65    0.86 
  -3 -13   1   -0.22    0.28 
   3 -13  -1    0.09    0.33 
  -3 -13   1   -0.41    0.19 
  -3 -13   1   -0.05    0.20 
   3 -13  -1   -0.17    0.28 
   3 -13  -1    0.00    0.22 
   3 -13  -1    0.19    0.26 
  -3 -13   1    0.16    0.28 
  -3 -13   1   -0.20    0.20 
  -3  13   1    0.01    0.28 
   3  13  -1    0.02    0.25 
  -3  13   1   -0.04    0.25 
   2 -13  -1   26.01    1.40 
   2 -13  -1   23.96    1.30 
  -2 -13   1   23.86    1.28 
  -2 -13   1   24.68    1.32 
  -2 -13   1   26.83    1.47 
  -2 -13   1   24.75    1.38 
   2 -13  -1   23.08    1.46 
   2 -13  -1   26.26    1.31 
  -2 -13   1   23.43    1.42 
   2  13  -1   25.25    1.30 
  -2  13   1   25.24    1.35 
  -2  13   1   24.38    1.40 
  -1 -13   1    0.46    0.33 
   1 -13  -1    0.09    0.28 
  -1 -13   1    0.21    0.34 
   1 -13  -1    0.01    0.29 
   1 -13  -1    0.11    0.26 
   1 -13  -1    0.40    0.34 
  -1 -13   1    0.26    0.26 
  -1 -13   1   -0.01    0.23 
   1 -13  -1    0.19    0.28 
  -1 -13   1   -0.24    0.26 
  -1  13   1    0.12    0.25 
   1  13  -1    0.56    0.32 
   0 -13   1   23.85    1.33 
   0 -13  -1   24.14    1.36 
   0 -13  -1   24.23    1.44 
   0 -13  -1   22.38    1.26 
   0 -13   1   24.98    1.29 
   0 -13  -1   23.72    1.44 
   0 -13   1   24.06    1.45 
   0 -13   1   24.25    1.44 
   0 -13   1   26.25    1.32 
   0  13  -1   24.12    1.31 
   0  13   1   23.13    1.27 
   0  13  -1   24.91    1.40 
  -1 -13  -1    5.86    0.80 
  -1 -13  -1    6.59    0.89 
  -1 -13  -1    5.23    0.80 
  -1 -13  -1    4.83    0.69 
   1 -13   1    5.40    0.76 
   1 -13   1    6.19    0.76 
   1 -13   1    6.79    0.79 
   1 -13   1    5.24    0.80 
   1  13   1    6.13    0.76 
  -1  13  -1    5.88    0.78 
  -1  13  -1    4.98    0.74 
   2 -13   1   43.46    2.06 
  -2 -13  -1   49.38    1.92 
   2 -13   1   49.64    1.87 
   2 -13   1   45.26    1.93 
  -2 -13  -1   43.73    2.02 
   2 -13   1   45.64    1.85 
  -2 -13  -1   48.43    2.01 
  -2 -13  -1   49.35    2.07 
   2  13   1   47.62    1.86 
  -2  13  -1   43.16    1.95 
  -2  13  -1   45.12    1.92 
  -3 -13  -1    3.03    0.63 
   3 -13   1    2.44    0.52 
  -3 -13  -1    2.53    0.56 
  -3 -13  -1    2.19    0.55 
   3 -13   1    2.00    0.55 
   3 -13   1    2.26    0.52 
   3 -13   1    2.66    0.51 
  -3 -13  -1    2.08    0.48 
  -3  13  -1    1.52    0.47 
  -3  13  -1    2.82    0.58 
   3  13   1    2.40    0.47 
  -4 -13  -1   28.72    1.44 
   4 -13   1   30.79    1.46 
  -4 -13  -1   28.67    1.58 
  -4 -13  -1   28.87    1.55 
  -4 -13  -1   30.95    1.57 
   4 -13   1   32.08    1.44 
   4 -13   1   31.43    1.55 
   4 -13   1   31.71    1.72 
  -4  13  -1   31.66    1.60 
   4  13   1   31.99    1.44 
  -4  13  -1   32.31    1.66 
  -5 -13  -1   -0.15    0.20 
   5 -13   1   -0.04    0.30 
  -5 -13  -1    0.36    0.30 
   5 -13   1    0.82    0.38 
   5 -13   1    0.34    0.27 
  -5 -13  -1   -0.23    0.22 
   5 -13   1    0.49    0.30 
  -5 -13  -1    0.16    0.30 
   5  13   1    0.55    0.29 
  -5  13  -1    0.13    0.30 
   6 -13   1   18.62    1.18 
  -6 -13  -1   19.37    1.23 
   6 -13   1   18.31    1.11 
  -6 -13  -1   18.83    1.15 
   6 -13   1   16.02    1.26 
  -6 -13  -1   17.11    1.19 
  -6 -13  -1   17.89    1.21 
   6 -13   1   20.58    1.11 
  -6  13  -1   15.57    1.18 
  -7 -13  -1    0.72    0.37 
  -7 -13  -1    0.33    0.31 
   7 -13   1    0.76    0.37 
  -7 -13  -1    0.01    0.32 
   7 -13   1    0.29    0.30 
   7 -13   1   -0.05    0.33 
  -7 -13  -1    0.48    0.34 
   7 -13   1    0.76    0.36 
  -7  13  -1    0.87    0.40 
   8 -13   1   24.33    1.35 
  -8 -13  -1   22.87    1.37 
   8 -13   1   22.55    1.26 
   8 -13   1   27.02    1.27 
   8 -13   1   23.64    1.53 
  -8 -13  -1   24.61    1.33 
  -8 -13  -1   25.30    1.44 
  -8 -13  -1   25.56    1.41 
  -8  13  -1   24.19    1.48 
  -9 -13  -1    1.96    0.51 
  -9 -13  -1    1.15    0.44 
  -9 -13  -1    2.04    0.52 
   9 -13   1    0.55    0.33 
   9 -13   1    1.54    0.40 
  -9 -13  -1    2.22    0.52 
   9 -13   1    2.32    0.55 
   9 -13   1    1.05    0.50 
  -9  13  -1    1.45    0.52 
  -9  13  -1    1.21    0.52 
  10 -13   1   23.42    1.56 
 -10 -13  -1   22.79    1.40 
 -10 -13  -1   27.32    1.47 
  10 -13   1   25.83    1.37 
 -10 -13  -1   25.06    1.37 
  10 -13   1   24.14    1.36 
 -10 -13  -1   24.55    1.37 
 -10  13  -1   27.56    1.47 
 -10  13  -1   28.15    1.63 
  11 -13   1    0.54    0.35 
 -11 -13  -1    0.00    0.36 
  11 -13   1    0.15    0.31 
 -11 -13  -1   -0.07    0.25 
 -11 -13  -1    0.07    0.32 
 -11 -13  -1    0.06    0.27 
 -11  13  -1    0.36    0.39 
 -11  13  -1    0.18    0.38 
 -12 -13  -1    6.11    0.77 
 -12 -13  -1    7.65    0.96 
 -12 -13  -1    5.77    0.83 
  12 -13   1    5.82    0.77 
 -12  13  -1    5.32    0.84 
 -12  13  -1    6.07    0.92 
 -13 -13  -1    1.96    0.52 
  13 -13   1    3.17    0.62 
 -13 -13  -1    2.04    0.58 
 -13 -13  -1    2.98    0.57 
 -13  13  -1    4.00    0.80 
 -13  13  -1    3.20    0.69 
 -14 -13  -1   19.83    1.33 
  14 -13   1   17.75    1.15 
 -14 -13  -1   19.74    1.24 
 -14 -13  -1   20.62    1.18 
 -14  13  -1   20.77    1.39 
 -14  13  -1   20.40    1.45 
 -15 -13  -1    1.39    0.42 
  15 -13   1    2.17    0.51 
 -15  13  -1    2.37    0.63 
  13 -14  -1   -0.18    0.26 
 -13 -14   1   -0.39    0.28 
 -13 -14   1   -0.30    0.34 
  12 -14  -1   14.70    1.11 
 -12 -14   1   14.46    1.17 
 -12 -14   1   16.62    1.18 
 -12 -14   1   17.27    1.25 
  11 -14  -1    0.95    0.45 
  11 -14  -1    0.98    0.47 
  11 -14  -1    1.45    0.62 
 -11 -14   1    0.77    0.42 
 -11 -14   1    1.88    0.53 
 -11 -14   1    1.52    0.52 
 -11  14   1    1.84    0.60 
 -10 -14   1   10.46    1.16 
 -10 -14   1    9.65    1.03 
  10 -14  -1   10.90    1.11 
  10 -14  -1   12.62    1.44 
 -10 -14   1   11.26    1.16 
 -10 -14   1   12.21    1.14 
  10 -14  -1   10.67    1.08 
 -10  14   1   11.66    1.31 
   9 -14  -1    1.31    0.46 
  -9 -14   1    1.05    0.44 
  -9 -14   1    1.09    0.45 
  -9 -14   1    1.69    0.52 
  -9 -14   1    1.28    0.50 
   9 -14  -1    1.20    0.46 
   9 -14  -1    1.02    0.54 
  -9  14   1    1.32    0.55 
  -8 -14   1    8.17    1.03 
   8 -14  -1    6.91    0.94 
  -8 -14   1    8.16    0.94 
   8 -14  -1    6.96    0.88 
   8 -14  -1   10.88    1.34 
  -8 -14   1    9.76    1.15 
  -8 -14   1    6.48    0.88 
  -8  14   1    8.32    1.13 
  -7 -14   1    1.13    0.46 
  -7 -14   1    0.82    0.41 
   7 -14  -1    0.82    0.49 
  -7 -14   1    0.72    0.44 
   7 -14  -1    0.46    0.38 
   7 -14  -1    0.60    0.35 
  -7 -14   1    0.89    0.42 
  -7  14   1    1.05    0.49 
  -6 -14   1    6.62    0.83 
   6 -14  -1    6.98    0.89 
  -6 -14   1    6.57    0.94 
  -6 -14   1    6.02    0.87 
  -6 -14   1    5.20    0.83 
   6 -14  -1    6.77    0.90 
   6 -14  -1    6.90    1.02 
  -6  14   1    5.03    0.86 
   6  14  -1    6.64    0.81 
  -5 -14   1    5.45    0.85 
   5 -14  -1    5.90    0.83 
  -5 -14   1    6.09    0.82 
   5 -14  -1    5.82    0.94 
   5 -14  -1    5.77    0.84 
  -5 -14   1    7.08    0.92 
  -5 -14   1    6.21    0.92 
   5  14  -1    6.35    0.82 
  -5  14   1    5.30    0.87 
   4 -14  -1    5.52    0.79 
   4 -14  -1    4.86    0.87 
  -4 -14   1    5.65    0.83 
  -4 -14   1    6.92    0.98 
  -4 -14   1    5.43    0.76 
  -4 -14   1    4.51    0.78 
   4 -14  -1    4.22    0.75 
   4  14  -1    5.67    0.76 
  -4  14   1    5.43    0.89 
  -3 -14   1    2.80    0.58 
  -3 -14   1    1.28    0.49 
  -3 -14   1    1.39    0.49 
  -3 -14   1    1.08    0.49 
  -3 -14   1    1.16    0.45 
   3 -14  -1    1.48    0.52 
   3 -14  -1    2.74    0.66 
   3 -14  -1    1.72    0.49 
   3  14  -1    2.40    0.54 
  -3  14   1    1.54    0.56 
   2 -14  -1    3.30    0.72 
  -2 -14   1    4.84    0.81 
   2 -14  -1    4.69    0.74 
  -2 -14   1    4.75    0.78 
   2 -14  -1    4.74    0.78 
  -2 -14   1    5.94    0.78 
  -2 -14   1    2.81    0.66 
  -2 -14   1    6.16    0.84 
   2  14  -1    4.47    0.68 
  -1 -14   1    0.38    0.39 
  -1 -14   1   -0.47    0.28 
  -1 -14   1   -0.23    0.29 
   1 -14  -1    0.22    0.31 
   1 -14  -1    0.14    0.34 
  -1 -14   1    0.37    0.33 
  -1 -14   1   -0.33    0.27 
   1 -14  -1   -0.13    0.26 
  -1  14   1   -0.09    0.25 
   1  14  -1    0.28    0.33 
   0 -14  -1    3.32    0.67 
   0 -14  -1    2.67    0.66 
   0 -14   1    3.65    0.72 
   0 -14   1    2.99    0.58 
   0 -14   1    2.20    0.52 
   0 -14   1    4.62    0.77 
   0 -14  -1    3.85    0.67 
   0 -14  -1    3.40    0.71 
   0  14   1    2.77    0.63 
   0  14  -1    3.39    0.62 
  -1 -14  -1   -0.38    0.25 
   1 -14   1   -0.04    0.29 
   1 -14   1    0.07    0.32 
   1 -14   1    0.03    0.33 
  -1 -14  -1    0.10    0.37 
  -1 -14  -1    0.07    0.34 
  -1 -14  -1   -0.36    0.27 
   1 -14   1   -0.02    0.33 
   1  14   1   -0.10    0.26 
  -1  14  -1    0.14    0.30 
  -2 -14  -1    0.92    0.46 
   2 -14   1    0.32    0.32 
   2 -14   1    1.32    0.52 
  -2 -14  -1    1.10    0.52 
  -2 -14  -1    1.34    0.43 
   2 -14   1    1.11    0.44 
   2 -14   1    1.13    0.47 
  -2 -14  -1    0.81    0.47 
  -2  14  -1    0.90    0.43 
  -2  14  -1    1.44    0.49 
   2  14   1    1.70    0.49 
   3 -14   1    0.90    0.46 
  -3 -14  -1   -0.22    0.29 
   3 -14   1    0.45    0.37 
  -3 -14  -1    0.35    0.38 
   3 -14   1    0.06    0.29 
  -3 -14  -1   -0.15    0.30 
   3 -14   1   -0.07    0.28 
  -3 -14  -1    0.77    0.39 
  -3  14  -1    0.43    0.35 
  -3  14  -1    0.35    0.37 
   3  14   1   -0.04    0.28 
  -4 -14  -1    0.92    0.45 
  -4 -14  -1    0.56    0.45 
   4 -14   1    0.23    0.33 
  -4 -14  -1    1.48    0.52 
   4 -14   1    0.66    0.38 
  -4 -14  -1    0.37    0.33 
   4 -14   1    0.27    0.34 
   4 -14   1    0.75    0.45 
  -4  14  -1    0.39    0.40 
  -5 -14  -1    4.83    0.73 
  -5 -14  -1    4.12    0.78 
   5 -14   1    4.46    0.71 
  -5 -14  -1    3.60    0.72 
   5 -14   1    3.94    0.65 
   5 -14   1    2.74    0.69 
   5 -14   1    3.04    0.63 
  -5 -14  -1    3.43    0.71 
  -5  14  -1    3.99    0.77 
   6 -14   1    1.73    0.63 
  -6 -14  -1    2.20    0.60 
   6 -14   1    2.21    0.52 
  -6 -14  -1    1.43    0.51 
   6 -14   1    1.97    0.49 
  -6 -14  -1    2.09    0.55 
  -6 -14  -1    1.21    0.46 
   6 -14   1    2.00    0.54 
  -6  14  -1    0.97    0.47 
   7 -14   1    2.78    0.55 
  -7 -14  -1    1.67    0.54 
  -7 -14  -1    0.88    0.47 
   7 -14   1    1.95    0.53 
   7 -14   1    2.87    0.64 
  -7 -14  -1    1.94    0.55 
  -7 -14  -1    2.46    0.57 
   7 -14   1    3.08    0.75 
  -7  14  -1    2.56    0.65 
   8 -14   1    4.14    0.65 
   8 -14   1    3.46    0.65 
   8 -14   1    4.25    0.86 
  -8 -14  -1    4.59    0.75 
  -8 -14  -1    3.58    0.74 
  -8 -14  -1    5.27    0.88 
  -8 -14  -1    4.72    0.78 
   8 -14   1    5.28    0.80 
  -8  14  -1    4.44    0.81 
  -9 -14  -1    1.15    0.50 
   9 -14   1    2.14    0.72 
   9 -14   1    1.92    0.52 
  -9 -14  -1    1.54    0.54 
  -9 -14  -1    2.21    0.57 
   9 -14   1    1.54    0.53 
  -9 -14  -1    1.81    0.58 
  -9  14  -1    1.61    0.57 
  10 -14   1    2.81    0.74 
 -10 -14  -1    2.41    0.60 
 -10 -14  -1    1.40    0.49 
 -10 -14  -1    2.28    0.59 
  10 -14   1    2.35    0.58 
  10 -14   1    1.74    0.56 
 -10 -14  -1    1.29    0.51 
 -10  14  -1    1.87    0.60 
  11 -14   1    0.01    0.36 
  11 -14   1   -0.09    0.31 
 -11 -14  -1   -0.46    0.32 
 -11 -14  -1    0.20    0.35 
 -11 -14  -1   -0.13    0.30 
 -12 -14  -1   14.55    1.39 
  12 -14   1   11.44    1.12 
 -12 -14  -1   10.41    1.12 
 -12 -14  -1   12.62    1.02 
  -9 -15   1    2.57    0.65 
  -9 -15   1    2.48    0.60 
  -9 -15   1    2.70    0.63 
   9 -15  -1    3.09    0.65 
   9 -15  -1    3.84    0.90 
   9 -15  -1    2.58    0.66 
   8 -15  -1    5.48    0.84 
  -8 -15   1    5.03    0.88 
   8 -15  -1    4.07    0.88 
  -8 -15   1    5.82    0.85 
  -8 -15   1    5.33    0.84 
   8 -15  -1    5.47    0.85 
  -8  15   1    6.09    1.00 
   7 -15  -1    4.59    0.75 
  -7 -15   1    5.40    0.86 
   7 -15  -1    5.71    0.92 
   7 -15  -1    4.97    0.96 
  -7 -15   1    5.71    0.88 
  -7 -15   1    4.13    0.75 
  -7  15   1    5.39    0.94 
  -6 -15   1    7.85    0.98 
  -6 -15   1    6.22    0.97 
   6 -15  -1    5.03    0.86 
   6 -15  -1    6.16    1.01 
  -6 -15   1    7.17    1.00 
   6 -15  -1    6.92    0.90 
  -6  15   1    5.80    0.94 
   5 -15  -1    5.67    0.91 
  -5 -15   1    4.26    0.78 
  -5 -15   1    4.06    0.73 
   5 -15  -1    4.70    0.88 
  -5 -15   1    5.63    0.87 
   5 -15  -1    5.00    0.79 
  -5 -15   1    4.27    0.91 
  -5  15   1    3.34    0.75 
   4 -15  -1    4.54    0.80 
  -4 -15   1    6.06    0.84 
  -4 -15   1    4.83    0.81 
  -4 -15   1    6.79    1.03 
  -4 -15   1    5.13    0.86 
   4 -15  -1    6.31    0.88 
   4 -15  -1    5.60    0.97 
   4  15  -1    7.65    0.93 
   3 -15  -1    4.59    0.75 
  -3 -15   1    3.15    0.73 
   3 -15  -1    3.47    0.73 
  -3 -15   1    3.75    0.75 
  -3 -15   1    4.45    0.80 
   3 -15  -1    3.42    0.80 
  -3 -15   1    2.63    0.59 
   3  15  -1    4.48    0.73 
  -2 -15   1    8.49    1.04 
  -2 -15   1    9.66    1.21 
  -2 -15   1    9.65    1.05 
   2 -15  -1   10.08    1.27 
   2 -15  -1    9.62    1.12 
  -2 -15   1   11.11    1.29 
   2 -15  -1    9.32    1.08 
   2  15  -1    8.34    0.96 
  -1 -15   1   15.98    1.23 
  -1 -15   1   20.41    1.46 
  -1 -15   1   17.98    1.22 
   1 -15  -1   18.05    1.31 
   1 -15  -1   17.52    1.41 
   1 -15  -1   19.53    1.28 
   1  15  -1   18.05    1.25 
   0 -15   1   11.70    1.33 
   0 -15   1    9.43    1.10 
   0 -15  -1   12.24    1.27 
   0 -15   1   12.25    1.21 
   0 -15  -1   12.91    1.37 
   0 -15  -1   11.32    1.14 
   0 -15   1   10.20    1.08 
   0  15   1   10.60    1.10 
   0  15  -1    9.97    1.09 
  -1 -15  -1   18.45    1.31 
   1 -15   1   15.83    1.34 
   1 -15   1   13.84    1.08 
   1 -15   1   15.20    1.14 
   1 -15   1   16.25    1.22 
  -1 -15  -1   16.41    1.34 
  -1 -15  -1   15.91    1.16 
  -1 -15  -1   17.01    1.34 
   1  15   1   16.77    1.19 
  -1  15  -1   15.92    1.22 
   2 -15   1   15.60    1.32 
  -2 -15  -1   11.75    1.24 
  -2 -15  -1   11.20    1.26 
  -2 -15  -1   13.06    1.24 
   2 -15   1   13.95    1.10 
  -2 -15  -1   13.22    1.37 
   2 -15   1   12.07    1.18 
   2  15   1   13.99    1.09 
  -2  15  -1   12.40    1.23 
   3 -15   1    9.93    1.15 
   3 -15   1   11.54    1.12 
   3 -15   1   12.51    1.36 
  -3 -15  -1    9.59    1.18 
   3 -15   1   10.59    1.09 
  -3 -15  -1   11.94    1.27 
  -3 -15  -1   14.01    1.38 
  -3 -15  -1   12.24    1.20 
   4 -15   1    4.49    0.77 
   4 -15   1    5.66    0.90 
   4 -15   1    6.65    0.88 
  -4 -15  -1    6.00    0.93 
   4 -15   1    6.68    1.01 
  -4 -15  -1    6.51    0.97 
  -4 -15  -1    5.40    0.92 
  -4 -15  -1    4.60    0.78 
  -4  15  -1    5.60    0.93 
  -5 -15  -1   14.73    1.44 
   5 -15   1   10.15    1.12 
   5 -15   1   13.87    1.04 
   5 -15   1   10.98    1.10 
  -5 -15  -1   12.09    1.22 
   5 -15   1   14.32    1.51 
  -5 -15  -1   11.20    1.24 
  -5  15  -1   13.28    1.37 
   6 -15   1    3.39    0.77 
   6 -15   1    1.77    0.56 
  -6 -15  -1    1.81    0.56 
   6 -15   1    2.33    0.56 
   6 -15   1    2.48    0.57 
  -6 -15  -1    1.81    0.55 
  -6 -15  -1    3.01    0.69 
  -6  15  -1    3.69    0.81 
   7 -15   1    1.29    0.53 
   7 -15   1    1.90    0.57 
  -7 -15  -1    1.94    0.63 
  -7 -15  -1    1.85    0.57 
   7 -15   1    1.20    0.55 
   7 -15   1    1.83    0.51 
  -7 -15  -1    1.88    0.56 
  -7  15  -1    1.28    0.61 
  -8 -15  -1    3.85    0.71 
   8 -15   1    4.91    0.76 
   8 -15   1    3.79    0.88 
   8 -15   1    3.76    0.71 
  -8 -15  -1    5.46    0.90 
  -8 -15  -1    2.61    0.64 
   8 -15   1    3.60    0.70 
 -28   0   2    0.20    0.38 
 -28   0   2    0.55    0.37 
 -27   0   2   -0.50    0.26 
 -27   0   2    0.16    0.41 
 -26   0   2    0.87    0.44 
 -26   0   2    0.31    0.36 
 -25   0   2   -0.23    0.24 
 -25   0   2    0.06    0.31 
 -24   0   2    0.58    0.39 
 -24   0   2    0.46    0.34 
 -23   0   2    0.09    0.12 
 -23   0   2    0.39    0.35 
 -23   0   2   -0.34    0.23 
 -22   0   2    7.12    0.83 
  22   0  -2    7.92    0.80 
 -22   0   2    6.60    0.88 
 -22   0   2    7.58    0.41 
  21   0  -2    0.01    0.21 
 -21   0   2   -0.06    0.16 
 -21   0   2   -0.09    0.12 
 -21   0   2    0.17    0.27 
 -21   0   2    0.07    0.33 
  20   0  -2    2.44    0.44 
 -20   0   2    2.56    0.56 
 -20   0   2    2.89    0.52 
 -20   0   2    2.84    0.32 
 -20   0   2    2.83    0.38 
 -19   0   2    0.02    0.10 
 -19   0   2    0.10    0.12 
 -19   0   2    0.14    0.20 
  19   0  -2   -0.17    0.16 
 -19   0   2   -0.09    0.17 
 -19   0   2    0.14    0.15 
 -19   0   2    0.03    0.24 
 -18   0   2    7.48    0.44 
 -18   0   2    7.83    0.76 
 -18   0   2    7.84    0.42 
 -18   0   2    7.78    0.59 
  18   0  -2    7.65    0.60 
 -18   0   2    8.27    0.51 
 -18   0   2    7.72    0.82 
 -17   0   2   -0.01    0.11 
 -17   0   2   -0.28    0.16 
 -17   0   2    0.07    0.11 
 -17   0   2    0.00    0.18 
 -17   0   2    0.22    0.15 
  17   0  -2    0.01    0.15 
 -17   0   2   -0.03    0.17 
 -16   0   2   19.26    0.69 
 -16   0   2   18.22    0.92 
 -16   0   2   19.53    0.72 
  16   0  -2   19.18    0.89 
 -16   0   2   19.05    0.88 
 -16   0   2   19.36    0.76 
 -16   0   2   18.07    0.99 
 -15   0   2   -0.08    0.14 
 -15   0   2    0.12    0.16 
 -15   0   2   -0.02    0.09 
 -15   0   2    0.04    0.11 
 -15   0   2    0.01    0.09 
 -15   0   2   -0.14    0.14 
  15   0  -2   -0.07    0.11 
 -14   0   2   13.91    0.71 
 -14   0   2   14.29    0.80 
 -14   0   2   14.73    0.62 
 -14   0   2   14.41    0.59 
 -14   0   2   15.74    0.77 
  14   0  -2   14.85    0.72 
 -14   0   2   15.16    0.58 
 -13   0   2   -0.08    0.11 
 -13   0   2   -0.05    0.14 
 -13   0   2   -0.02    0.11 
  13   0  -2    0.05    0.13 
 -13   0   2    0.10    0.11 
 -13   0   2    0.15    0.10 
 -13   0   2   -0.11    0.07 
 -12   0   2   87.42    2.09 
 -12   0   2   88.43    2.11 
 -12   0   2   88.38    2.13 
  12   0  -2   89.37    2.01 
 -12   0   2   89.33    2.42 
 -12   0   2   87.17    2.27 
  12   0  -2   90.52    2.29 
 -12   0   2   90.40    2.33 
 -11   0   2    0.09    0.08 
  11   0  -2    0.11    0.11 
 -11   0   2    0.03    0.12 
 -11   0   2    0.19    0.13 
 -11   0   2   -0.06    0.06 
 -11   0   2    0.03    0.11 
  11   0  -2    0.02    0.07 
 -11   0   2    0.03    0.08 
 -10   0   2   93.30    2.34 
 -10   0   2   97.23    2.22 
 -10   0   2   96.62    2.45 
  10   0  -2   97.63    2.35 
 -10   0   2   93.35    2.21 
 -10   0   2   93.87    2.36 
  10   0  -2   97.83    2.16 
 -10   0   2   96.86    2.21 
  -9   0   2    0.03    0.08 
  -9   0   2    0.11    0.08 
   9   0  -2   -0.04    0.06 
  -9   0   2    0.11    0.10 
  -9   0   2   -0.04    0.06 
  -9   0   2    0.02    0.07 
   9   0  -2   -0.02    0.09 
  -9   0   2   -0.02    0.10 
  -8   0   2   97.00    2.36 
   8   0  -2   99.50    2.30 
  -8   0   2   97.34    1.99 
  -8   0   2   97.59    2.31 
  -8   0   2   96.73    2.20 
  -8   0   2   96.84    2.19 
  -8   0   2   96.47    2.20 
  -8   0   2   98.58    2.31 
  -7   0   2    0.06    0.06 
  -7   0   2    0.00    0.06 
  -7   0   2   -0.10    0.05 
  -7   0   2   -0.11    0.06 
  -7   0   2   -0.04    0.07 
   7   0  -2   -0.01    0.07 
  -7   0   2    0.05    0.08 
   6   0  -2  238.98    4.99 
  -6   0   2  235.85    4.92 
  -6   0   2  237.32    5.00 
  -6   0   2  239.89    5.02 
  -6   0   2  234.96    4.92 
  -6   0   2  231.25    4.97 
  -6   0   2  238.06    4.91 
  -5   0   2   -0.04    0.05 
  -5   0   2   -0.04    0.05 
  -5   0   2   -0.03    0.06 
  -5   0   2   -0.07    0.06 
  -5   0   2    0.00    0.05 
   5   0  -2   -0.08    0.06 
  -5   0   2   -0.03    0.06 
   4   0  -2    0.81    0.12 
  -4   0   2    0.57    0.10 
  -4   0   2    0.90    0.12 
  -4   0   2    0.85    0.11 
  -4   0   2    0.76    0.11 
  -3   0   2   -0.03    0.03 
   3   0  -2   -0.02    0.04 
  -3   0   2   -0.03    0.04 
  -3   0   2    0.13    0.05 
   3   0  -2   -0.01    0.04 
   3   0  -2   -0.03    0.03 
  -3   0   2   -0.04    0.04 
  -3   0   2    0.02    0.05 
  -2   0   2  463.52    9.54 
  -2   0   2  451.96    9.49 
   2   0  -2  459.65    9.46 
  -2   0   2  465.92    9.61 
   2   0  -2  451.65    9.39 
   2   0  -2  450.87    9.52 
  -1   0   2   -0.37    0.02 
  -1   0   2   -0.34    0.03 
  -1   0   2   -0.33    0.03 
   1   0  -2   -0.32    0.03 
   1   0  -2   -0.19    0.04 
   1   0  -2   -0.36    0.02 
   0   0  -2  441.98    8.75 
   0   0  -2  440.67    8.73 
   0   0   2  436.01    8.73 
   0   0  -2  452.17    8.89 
   0   0  -2  437.52    8.79 
   0   0  -2  437.45    8.71 
   0   0  -2  444.54    8.88 
   0   0   2  381.92    8.81 
   0   0   2  372.92    8.68 
   0   0   2  433.77    8.78 
  -1   0  -2   -0.39    0.03 
  -1   0  -2   -0.42    0.03 
  -1   0  -2   -0.40    0.03 
   1   0   2   -0.36    0.03 
  -1   0  -2   -0.35    0.03 
  -1   0  -2   -0.40    0.02 
  -1   0  -2   -0.45    0.03 
  -1   0  -2   -0.41    0.03 
   1   0   2   -0.36    0.02 
  -1   0  -2   -0.42    0.02 
  -1   0  -2   -0.34    0.03 
  -2   0  -2  183.88    3.77 
  -2   0  -2  188.78    3.86 
  -2   0  -2  182.78    3.86 
  -2   0  -2  191.71    3.78 
  -2   0  -2  184.35    3.77 
  -2   0  -2  188.47    3.77 
   2   0   2  183.01    3.81 
  -2   0  -2  186.45    3.81 
  -2   0  -2  183.13    3.78 
  -3   0  -2   -0.03    0.03 
  -3   0  -2    0.20    0.04 
   3   0   2    0.03    0.02 
  -3   0  -2    0.01    0.05 
  -3   0  -2    0.07    0.06 
   3   0   2    0.06    0.03 
  -3   0  -2    0.09    0.03 
  -3   0  -2    0.05    0.03 
  -3   0  -2    0.07    0.03 
  -3   0  -2    0.07    0.06 
  -3   0  -2    0.06    0.03 
  -4   0  -2  930.77   18.87 
  -4   0  -2  906.05   18.69 
  -4   0  -2  923.67   18.72 
  -4   0  -2  950.89   18.71 
  -4   0  -2  941.62   18.72 
  -4   0  -2  915.22   19.02 
  -4   0  -2  919.30   18.71 
  -4   0  -2  932.89   18.97 
  -4   0  -2  932.66   18.75 
  -5   0  -2    0.20    0.11 
  -5   0  -2   -0.09    0.03 
  -5   0  -2   -0.12    0.08 
  -5   0  -2    0.03    0.05 
  -5   0  -2   -0.01    0.04 
  -5   0  -2   -0.06    0.04 
   5   0   2    0.03    0.07 
  -5   0  -2   -0.07    0.05 
  -5   0  -2   -0.09    0.06 
  -5   0  -2   -0.09    0.03 
  -6   0  -2   13.87    0.57 
  -6   0  -2   14.66    0.38 
  -6   0  -2   14.40    0.38 
  -6   0  -2   14.37    0.43 
  -6   0  -2   14.00    0.38 
  -6   0  -2   13.91    0.54 
   6   0   2   14.85    0.49 
  -6   0  -2   14.01    0.48 
  -6   0  -2   13.93    0.39 
  -7   0  -2    0.03    0.05 
  -7   0  -2   -0.09    0.08 
  -7   0  -2   -0.08    0.03 
  -7   0  -2    0.07    0.05 
  -7   0  -2   -0.03    0.07 
  -7   0  -2    0.02    0.04 
  -7   0  -2    0.06    0.06 
   7   0   2   -0.10    0.06 
  -7   0  -2   -0.11    0.07
[truncated: 4,065,906 more chars]
